# Supplementary material for: Composition and mixing state of atmospheric aerosols determined byelectron microscopy: method development and application to aged Saharandust deposition in the Caribbean boundary layer
Source: Copernicus journal article supplement (doi:10.5194/acp-2018-417), 2018-05-02
Supplement: Supplementary file 1 [file acp-2018-417-supplement.zip]

Archive with 4 entries (4 files):
- RPS_2013_2016_all.txt
- sampling_times.txt
- Supplement_Tables_Figures.pdf
- table_description.txt
