# Supplementary material for: Composition and mixing state of atmospheric aerosols determined byelectron microscopy: method development and application to aged Saharandust deposition in the Caribbean boundary layer
Source: Copernicus journal article supplement (doi:10.5194/acp-2018-417), 2018-05-02
Supplement: Supplementary file 1 [file acp-2018-417-supplement.zip › RPS_2013_2016_all.txt]

sample name	AvgDiam	LProj	Area	Perim	Aspe	XPos_abs	YPos_abs	C	N	O	Na	Mg	Al	Si	P	S	Cl	K	Ca	Ti	V	Cr	Mn	Fe	Co	B	F	Ni	Cu	Zn	Br	Sr	Zr	Mo	Ag	Sn	Sb	Ba	Y	In	Ce	Nd	Tb	Re	Os	Pt	Tl	Pb	Ge
RPS_01	3.78	4.36	11.2	13.17	1.33	4119.786133	21107.025	76.7864	1.2429	3.9788	8.4343	0.5505	0	0	0	0.3975	8.6095	0	0	0	0	0	0	0	0	0	0	0	0	0	0	0	0	0	0	0	0	0	0	0	0	0	0	0	0	0	0	0	0
RPS_01	1.62	2.01	2.05	5.35	1.55	4096.292969	21099.8475	93.1003	1.111	3.8718	0.8057	0.2	0	0	0	0.1782	0.7329	0	0	0	0	0	0	0	0	0	0	0	0	0	0	0	0	0	0	0	0	0	0	0	0	0	0	0	0	0	0	0	0
RPS_01	2.39	2.78	4.48	7.81	1.36	4130.445068	21093.685	86.9892	1.8236	7.7379	0	0	0	3.4493	0	0	0	0	0	0	0	0	0	0	0	0	0	0	0	0	0	0	0	0	0	0	0	0	0	0	0	0	0	0	0	0	0	0	0
RPS_01	4.11	5.1	13.29	13.31	1.53	4116.668213	21084.4775	79.1388	1.1964	5.3635	6.2038	0.7853	0	0	0	0.6367	6.6755	0	0	0	0	0	0	0	0	0	0	0	0	0	0	0	0	0	0	0	0	0	0	0	0	0	0	0	0	0	0	0	0
RPS_01	5.25	6.79	21.67	18.09	1.67	4100.063477	21071.7175	56.4539	2.0084	24.9411	1.1194	0.8479	3.7254	9.5063	0	0	0.1566	0.2929	0.1665	0	0	0	0	0.7815	0	0	0	0	0	0	0	0	0	0	0	0	0	0	0	0	0	0	0	0	0	0	0	0	0
RPS_01	2.71	3.02	5.76	8.54	1.25	4132.837891	21053.23	86.161	1.1984	3.7244	4.1683	0.2307	0	0	0	0.1673	4.3498	0	0	0	0	0	0	0	0	0	0	0	0	0	0	0	0	0	0	0	0	0	0	0	0	0	0	0	0	0	0	0	0
RPS_01	3.57	4.09	10.01	11.43	1.31	4066.128906	21051.8525	75.1571	0.8608	3.9108	9.1967	0.4313	0	0	0	0.5551	9.6651	0	0.2231	0	0	0	0	0	0	0	0	0	0	0	0	0	0	0	0	0	0	0	0	0	0	0	0	0	0	0	0	0	0
RPS_01	2.92	3.2	6.68	9.26	1.21	4018.5625	21048.155	76.2028	1.701	11.8573	1.288	0.2159	1.017	5.4302	0	0.2904	1.4164	0	0	0	0	0	0	0.581	0	0	0	0	0	0	0	0	0	0	0	0	0	0	0	0	0	0	0	0	0	0	0	0	0
RPS_01	3.71	4.78	10.8	12.15	1.66	4137.768555	21045.11	79.5398	2.0472	11.8451	0	0.3162	0.8472	1.6475	0	0	0	0.1691	3.1568	0	0	0	0	0.4312	0	0	0	0	0	0	0	0	0	0	0	0	0	0	0	0	0	0	0	0	0	0	0	0	0
RPS_01	5.94	7.78	27.72	20.4	1.71	4009.716309	21042.1375	48.6546	2.2684	30.2231	0.1746	3.0659	4.3483	7.4008	0	0	0	0.8092	0	0.3508	0	0	0	2.7043	0	0	0	0	0	0	0	0	0	0	0	0	0	0	0	0	0	0	0	0	0	0	0	0	0
RPS_01	2.6	2.88	5.32	8.54	1.23	4059.458008	21035.54	88.291	1.2649	3.7212	2.9386	0.3009	0	0	0	0.332	3.1515	0	0	0	0	0	0	0	0	0	0	0	0	0	0	0	0	0	0	0	0	0	0	0	0	0	0	0	0	0	0	0	0
RPS_01	3.14	3.53	7.72	11	1.27	4004.205566	21025.4625	73.3482	1.4453	14.1199	0.7154	0.3926	2.1737	6.6197	0	0.1491	0.4685	0	0	0	0	0	0	0.5676	0	0	0	0	0	0	0	0	0	0	0	0	0	0	0	0	0	0	0	0	0	0	0	0	0
RPS_01	5.72	6.51	25.69	18.52	1.3	4048.654053	21020.6775	53.4054	2.1082	28.0093	0	0.369	5.1573	5.9634	0	0	0	0.1828	0	0	0	0	0	4.5766	0.2281	0	0	0	0	0	0	0	0	0	0	0	0	0	0	0	0	0	0	0	0	0	0	0	0
RPS_01	3.67	4.4	10.59	12.3	1.44	4073.089844	21019.88	77.5383	1.1213	5.6464	6.7654	0.7674	0	0	0	0.8515	7.0262	0	0.2835	0	0	0	0	0	0	0	0	0	0	0	0	0	0	0	0	0	0	0	0	0	0	0	0	0	0	0	0	0	0
RPS_01	3.38	3.86	8.98	10.85	1.3	4042.925781	21019.155	80.653	1.0353	5.8023	4.9317	0.6332	0	0	0	1.1213	5.3968	0	0.4264	0	0	0	0	0	0	0	0	0	0	0	0	0	0	0	0	0	0	0	0	0	0	0	0	0	0	0	0	0	0
RPS_01	7.29	10.18	41.79	28.36	1.95	4115.145508	21008.9325	58.4381	1.6655	21.948	0.175	1.1637	4.4971	8.3455	0	0.3171	0.3389	0.6234	0.9627	0	0	0	0	1.5251	0	0	0	0	0	0	0	0	0	0	0	0	0	0	0	0	0	0	0	0	0	0	0	0	0
RPS_01	2.5	2.95	4.9	11	1.4	4043.21582	21010.165	90.4586	1.5007	5.0711	1.0115	0.4018	0	0	0	0.4724	0.8339	0	0.25	0	0	0	0	0	0	0	0	0	0	0	0	0	0	0	0	0	0	0	0	0	0	0	0	0	0	0	0	0	0
RPS_01	1.78	2.85	2.49	8.54	2.56	4043.070801	21006.395	93.4974	1.3509	3.3885	1.012	0	0	0	0	0	0.7511	0	0	0	0	0	0	0	0	0	0	0	0	0	0	0	0	0	0	0	0	0	0	0	0	0	0	0	0	0	0	0	0
RPS_01	3.18	3.69	7.96	10.56	1.34	4216.15918	21103.255	78.6047	0.9564	4.5036	7.0318	0.6163	0	0	0	0.4708	7.8164	0	0	0	0	0	0	0	0	0	0	0	0	0	0	0	0	0	0	0	0	0	0	0	0	0	0	0	0	0	0	0	0
RPS_01	3.22	3.58	8.14	10.85	1.24	4161.776855	21090.35	80.4058	0.9098	3.8224	6.9083	0.3948	0	0	0	0.4617	7.0972	0	0	0	0	0	0	0	0	0	0	0	0	0	0	0	0	0	0	0	0	0	0	0	0	0	0	0	0	0	0	0	0
RPS_01	3.29	3.97	8.48	11.43	1.46	4190.345703	21088.3925	82.3029	1.0009	4.6074	5.4566	0.4293	0	0	0	0.598	5.3715	0	0.2333	0	0	0	0	0	0	0	0	0	0	0	0	0	0	0	0	0	0	0	0	0	0	0	0	0	0	0	0	0	0
RPS_01	3.64	5.81	10.4	23.29	2.55	4240.087402	21086.5075	92.0762	2.2364	3.2426	1.2672	0	0	0	0	0	1.1776	0	0	0	0	0	0	0	0	0	0	0	0	0	0	0	0	0	0	0	0	0	0	0	0	0	0	0	0	0	0	0	0
RPS_01	6.23	7.95	30.52	24.89	1.62	4255.024414	21076.2125	60.2123	1.562	22.843	1.2921	0.1976	5.8175	6.2894	0	0	1.2865	0	0	0	0	0	0	0.4996	0	0	0	0	0	0	0	0	0	0	0	0	0	0	0	0	0	0	0	0	0	0	0	0	0
RPS_01	3.85	4.54	11.66	13.17	1.39	4217.319336	21071.645	73.1451	1.9244	15.9448	0	0.4397	2.8618	4.5671	0	0	0	0.238	0	0	0	0	0	0.8789	0	0	0	0	0	0	0	0	0	0	0	0	0	0	0	0	0	0	0	0	0	0	0	0	0
RPS_01	5.88	6.84	27.11	19.97	1.36	4258.504883	21057.6525	61.9184	0.5513	5.8702	14.4413	0.9714	0	0	0	1.1013	14.6144	0.1789	0.3527	0	0	0	0	0	0	0	0	0	0	0	0	0	0	0	0	0	0	0	0	0	0	0	0	0	0	0	0	0	0
RPS_01	5.09	6.33	20.35	16.78	1.55	4229.065918	21054.825	49.3361	2.111	31.3218	0.1039	0.2589	7.9838	7.9496	0	0	0	0.1929	0	0	0	0	0	0.742	0	0	0	0	0	0	0	0	0	0	0	0	0	0	0	0	0	0	0	0	0	0	0	0	0
RPS_01	2.99	3.77	7.03	14.76	1.59	4218.914551	21052.65	91.1196	1.3651	3.0273	2.2487	0	0	0	0	0	2.2393	0	0	0	0	0	0	0	0	0	0	0	0	0	0	0	0	0	0	0	0	0	0	0	0	0	0	0	0	0	0	0	0
RPS_01	6.43	8.06	32.49	23.01	1.57	4216.449219	21046.6325	50.9303	0.804	17.7538	9.5628	0.8534	4.2142	4.1496	0	0.4951	10.8942	0	0	0	0	0	0	0.3425	0	0	0	0	0	0	0	0	0	0	0	0	0	0	0	0	0	0	0	0	0	0	0	0	0
RPS_01	5.82	6.61	26.57	21.99	1.29	4240.014893	21042.21	58.2915	1.2089	19.9572	3.478	0.6257	4.9535	5.4077	0	0.3771	3.922	1.3948	0	0	0	0	0	0.3836	0	0	0	0	0	0	0	0	0	0	0	0	0	0	0	0	0	0	0	0	0	0	0	0	0
RPS_01	4.32	4.86	14.63	14.18	1.27	4277.502441	21042.645	75.1958	0.9562	2.978	9.9543	0.3107	0	0	0	0.2245	10.3804	0	0	0	0	0	0	0	0	0	0	0	0	0	0	0	0	0	0	0	0	0	0	0	0	0	0	0	0	0	0	0	0
RPS_01	3.42	3.91	9.21	11.43	1.3	4158.876465	21033.51	81.1653	1.3148	5.277	5.0363	0.5851	0	0	0	0.6941	5.5931	0	0.3343	0	0	0	0	0	0	0	0	0	0	0	0	0	0	0	0	0	0	0	0	0	0	0	0	0	0	0	0	0	0
RPS_01	2.17	2.56	3.68	7.23	1.4	4255.169434	21029.885	88.6189	2.3826	6.5581	0	0	0.2654	0.4504	0	0	0	0	0	1.7246	0	0	0	0	0	0	0	0	0	0	0	0	0	0	0	0	0	0	0	0	0	0	0	0	0	0	0	0	0
RPS_01	2.26	2.72	4	7.23	1.45	4238.202148	21027.42	87.8727	1.6206	8.1461	0	0.1951	0.775	1.3904	0	0	0	0	0	0	0	0	0	0	0	0	0	0	0	0	0	0	0	0	0	0	0	0	0	0	0	0	0	0	0	0	0	0	0
RPS_01	5.05	6.67	20.03	19.53	1.74	4221.959961	21024.1575	64.8897	0	8.3395	10.2176	1.0784	0.5274	0.9345	0	1.6319	10.5963	0.232	1.3132	0	0	0	0	0.2393	0	0	0	0	0	0	0	0	0	0	0	0	0	0	0	0	0	0	0	0	0	0	0	0	0
RPS_01	4.46	6.53	15.6	19.39	2.15	4255.169434	21016.545	77.7015	1.3873	4.4931	7.6401	0.2865	0	0	0	0.428	7.8118	0	0.2518	0	0	0	0	0	0	0	0	0	0	0	0	0	0	0	0	0	0	0	0	0	0	0	0	0	0	0	0	0	0
RPS_01	4.68	6.46	17.17	15.92	1.91	4178.164063	21014.5875	76.7143	0.6309	2.8605	9.726	0.1757	0	0	0	0.1346	9.7581	0	0	0	0	0	0	0	0	0	0	0	0	0	0	0	0	0	0	0	0	0	0	0	0	0	0	0	0	0	0	0	0
RPS_01	3.46	4.21	9.4	12.3	1.48	4206.87793	21014.515	81.3986	1.0431	4.4623	5.4676	0.65	0	0	0	0.8611	5.759	0	0.3584	0	0	0	0	0	0	0	0	0	0	0	0	0	0	0	0	0	0	0	0	0	0	0	0	0	0	0	0	0	0
RPS_01	1.7	2.07	2.26	5.35	1.49	4254.589355	21013.5725	91.2663	0.9543	5.3865	0.7491	0.1721	0	0	0	0.6755	0.3591	0	0.4371	0	0	0	0	0	0	0	0	0	0	0	0	0	0	0	0	0	0	0	0	0	0	0	0	0	0	0	0	0	0
RPS_01	2.79	3.26	6.09	9.4	1.37	4235.011719	21005.38	84.7108	1.0841	5.3556	3.3559	0.798	0	0	0	0.8504	3.5346	0	0.3108	0	0	0	0	0	0	0	0	0	0	0	0	0	0	0	0	0	0	0	0	0	0	0	0	0	0	0	0	0	0
RPS_01	2.74	2.98	5.9	9.26	1.18	4155.976074	20989.85	86.0845	1.3034	4.2062	3.7847	0.3384	0	0	0	0.3131	3.9696	0	0	0	0	0	0	0	0	0	0	0	0	0	0	0	0	0	0	0	0	0	0	0	0	0	0	0	0	0	0	0	0
RPS_01	3.85	4.38	11.64	12.59	1.29	4241.537598	20986.95	71.2115	0.9656	5.0724	9.8685	0.8092	0.1201	0.118	0	1.2711	10.1196	0	0.4441	0	0	0	0	0	0	0	0	0	0	0	0	0	0	0	0	0	0	0	0	0	0	0	0	0	0	0	0	0	0
RPS_01	5.97	12.82	27.97	24.74	4.61	4185.850098	20977.67	77.558	2.2316	12.1341	0	0	0	0	0	4.2987	0	0	3.7777	0	0	0	0	0	0	0	0	0	0	0	0	0	0	0	0	0	0	0	0	0	0	0	0	0	0	0	0	0	0
RPS_01	2.44	2.81	4.67	8.1	1.33	4235.446777	20982.31	86.23	1.1422	4.4336	3.6261	0.3824	0	0	0	0.351	3.8346	0	0	0	0	0	0	0	0	0	0	0	0	0	0	0	0	0	0	0	0	0	0	0	0	0	0	0	0	0	0	0	0
RPS_01	4.16	5.19	13.59	14.18	1.56	4178.671631	20976.945	67.5539	0.5299	3.6535	13.3166	0.5139	0.1155	0	0	0.5082	13.8085	0	0	0	0	0	0	0	0	0	0	0	0	0	0	0	0	0	0	0	0	0	0	0	0	0	0	0	0	0	0	0	0
RPS_01	5.44	6.24	23.22	19.53	1.32	4195.131348	20922.0625	65.6589	0	4.0826	14.0341	0.7386	0	0	0	0.7778	14.708	0	0	0	0	0	0	0	0	0	0	0	0	0	0	0	0	0	0	0	0	0	0	0	0	0	0	0	0	0	0	0	0
RPS_01	5.03	6.02	19.85	17.07	1.43	4172.943359	20916.1175	66.9549	0	3.596	13.6461	0.7052	0	0	0	1.0019	14.0958	0	0	0	0	0	0	0	0	0	0	0	0	0	0	0	0	0	0	0	0	0	0	0	0	0	0	0	0	0	0	0	0
RPS_01	3.78	4.24	11.2	12.15	1.26	4244.292969	20910.1	71.263	0.7013	3.537	11.3355	0.6077	0	0	0	0.3694	12.1861	0	0	0	0	0	0	0	0	0	0	0	0	0	0	0	0	0	0	0	0	0	0	0	0	0	0	0	0	0	0	0	0
RPS_01	5.18	7.02	21.08	18.38	1.84	4228.775879	20892.99	53.8544	1.8739	26.0864	0.1046	0.2205	7.7469	8.447	0	0	0	0.1666	0	0.2208	0	0	0	1.0086	0.2703	0	0	0	0	0	0	0	0	0	0	0	0	0	0	0	0	0	0	0	0	0	0	0	0
RPS_01	4.47	5.27	15.72	14.18	1.39	4043.36084	20992.025	64.6083	1.9228	19.9063	0.1867	0.4498	4.6742	6.2103	0	0	0	1.0812	0	0	0	0	0	0.9605	0	0	0	0	0	0	0	0	0	0	0	0	0	0	0	0	0	0	0	0	0	0	0	0	0
RPS_01	3.55	4.09	9.92	13.89	1.33	4109.634766	20983.325	89.5637	1.4629	3.099	2.8659	0.1097	0	0	0	0	2.8989	0	0	0	0	0	0	0	0	0	0	0	0	0	0	0	0	0	0	0	0	0	0	0	0	0	0	0	0	0	0	0	0
RPS_01	5.71	8.47	25.6	45.58	2.2	4014.501953	20979.4825	85.4118	1.5291	5.5069	3.0904	0.3525	0	0	0	0.616	3.2562	0	0.2372	0	0	0	0	0	0	0	0	0	0	0	0	0	0	0	0	0	0	0	0	0	0	0	0	0	0	0	0	0	0
RPS_01	1.93	2.39	2.93	8.39	1.53	4058.007813	20974.48	91.8227	1.4182	4.9161	0.7662	0.2298	0	0	0	0.4206	0.4263	0	0	0	0	0	0	0	0	0	0	0	0	0	0	0	0	0	0	0	0	0	0	0	0	0	0	0	0	0	0	0	0
RPS_01	3.6	4.93	10.2	15.92	1.87	4051.626953	20969.26	85.8594	1.6722	4.3688	3.2483	0.545	0	0	0	0.6742	3.4038	0	0.2283	0	0	0	0	0	0	0	0	0	0	0	0	0	0	0	0	0	0	0	0	0	0	0	0	0	0	0	0	0	0
RPS_01	2.91	3.17	6.66	9.26	1.19	4040.17041	20967.4475	75.8893	0.8061	4.908	7.7367	0.9394	0	0	0	0.9973	8.4272	0	0.2959	0	0	0	0	0	0	0	0	0	0	0	0	0	0	0	0	0	0	0	0	0	0	0	0	0	0	0	0	0	0
RPS_01	3.59	4.3	10.11	11.14	1.44	4045.681152	20951.28	76.2373	1.0763	5.3498	7.2771	0.8121	0	0	0	1.0524	7.8423	0	0.3528	0	0	0	0	0	0	0	0	0	0	0	0	0	0	0	0	0	0	0	0	0	0	0	0	0	0	0	0	0	0
RPS_01	3.54	4.9	9.84	13.89	1.91	4120.65625	20948.09	76.3582	0.7811	4.1994	8.6467	0.3491	0	0	0	0.3556	9.3098	0	0	0	0	0	0	0	0	0	0	0	0	0	0	0	0	0	0	0	0	0	0	0	0	0	0	0	0	0	0	0	0
RPS_01	2.94	4.2	6.78	11.29	2.04	4066.273926	20932.575	88.2135	1.5884	5.0961	2.1955	0.3626	0	0	0	0.5237	2.0201	0	0	0	0	0	0	0	0	0	0	0	0	0	0	0	0	0	0	0	0	0	0	0	0	0	0	0	0	0	0	0	0
RPS_01	4.52	5.88	16.08	15.92	1.69	4129.502441	20920.105	53.6518	1.7943	25.7897	0	0.2693	2.2042	15.2854	0	0	0	0.2829	0	0	0	0	0	0.7223	0	0	0	0	0	0	0	0	0	0	0	0	0	0	0	0	0	0	0	0	0	0	0	0	0
RPS_01	2.77	3.07	6.03	8.54	1.23	4025.233398	20912.565	81.8954	1.0734	3.8496	6.0896	0.2361	0	0	0	0.293	6.5629	0	0	0	0	0	0	0	0	0	0	0	0	0	0	0	0	0	0	0	0	0	0	0	0	0	0	0	0	0	0	0	0
RPS_01	4.54	6.15	16.18	17.65	1.83	4094.117676	20904.59	68.8719	0.7243	4.5288	11.9207	0.6514	0	0	0	0.7052	12.3324	0	0.2652	0	0	0	0	0	0	0	0	0	0	0	0	0	0	0	0	0	0	0	0	0	0	0	0	0	0	0	0	0	0
RPS_01	4.37	5.91	14.99	15.77	1.83	4113.550293	20894.15	69.2509	1.7164	19.947	0	0.1043	4.155	4.3156	0	0	0	0	0	0	0	0	0	0.5107	0	0	0	0	0	0	0	0	0	0	0	0	0	0	0	0	0	0	0	0	0	0	0	0	0
RPS_01	4.98	5.65	19.49	16.93	1.29	4143.424316	20893.57	59.4369	2.1082	23.9471	0	0.499	4.4254	8.0095	0	0	0	0.1901	0	0	0	0	0	1.3839	0	0	0	0	0	0	0	0	0	0	0	0	0	0	0	0	0	0	0	0	0	0	0	0	0
RPS_01	4.18	4.78	13.75	14.03	1.31	3860.121094	20991.01	69.6336	0.7152	6.4199	9.695	1.3291	0	0.1289	0	1.1718	10.6429	0	0.2637	0	0	0	0	0	0	0	0	0	0	0	0	0	0	0	0	0	0	0	0	0	0	0	0	0	0	0	0	0	0
RPS_01	2.24	2.5	3.96	7.23	1.24	3965.115234	20988.4	88.0816	1.486	2.9679	3.5276	0.1907	0	0	0	0.1455	3.6007	0	0	0	0	0	0	0	0	0	0	0	0	0	0	0	0	0	0	0	0	0	0	0	0	0	0	0	0	0	0	0	0
RPS_01	2.23	3.07	3.91	7.96	1.89	3937.561523	20981.15	88.323	1.33	5.4017	1.9388	0.5387	0	0	0	0.4795	1.9883	0	0	0	0	0	0	0	0	0	0	0	0	0	0	0	0	0	0	0	0	0	0	0	0	0	0	0	0	0	0	0	0
RPS_01	4.48	5.26	15.74	16.35	1.38	3923.929688	20978.395	69.9318	0.5467	3.5116	12.2826	0.5151	0	0	0	0.2563	12.956	0	0	0	0	0	0	0	0	0	0	0	0	0	0	0	0	0	0	0	0	0	0	0	0	0	0	0	0	0	0	0	0
RPS_01	5.15	5.79	20.81	17.36	1.27	3930.890625	20974.8425	56.5435	1.7249	26.3721	0.9318	0	6.9362	6.6738	0	0	0	0.4753	0	0	0	0	0	0.3423	0	0	0	0	0	0	0	0	0	0	0	0	0	0	0	0	0	0	0	0	0	0	0	0	0
RPS_01	3.93	4.3	12.1	12.44	1.2	3952.933594	20960.85	69.4221	0.8885	6.0172	10.4333	0.8283	0	0	0	0.8503	11.2958	0	0.2645	0	0	0	0	0	0	0	0	0	0	0	0	0	0	0	0	0	0	0	0	0	0	0	0	0	0	0	0	0	0
RPS_01	2.43	2.76	4.65	8.1	1.29	3973.091309	20952.295	87.9079	1.1845	3.5358	3.2527	0.3098	0	0	0	0.2499	3.5594	0	0	0	0	0	0	0	0	0	0	0	0	0	0	0	0	0	0	0	0	0	0	0	0	0	0	0	0	0	0	0	0
RPS_01	5.12	5.52	20.56	17.22	1.16	3958.879395	20945.1175	61.671	2.0362	22.8373	0	5.6656	0.2452	0.5243	0	0	0	0	6.5064	0	0	0	0	0.2723	0.2416	0	0	0	0	0	0	0	0	0	0	0	0	0	0	0	0	0	0	0	0	0	0	0	0
RPS_01	2.58	3.24	5.23	8.68	1.57	3969.755859	20934.315	90.0055	1.8987	6.7897	0	0	0.3423	0.6383	0	0	0	0	0.3255	0	0	0	0	0	0	0	0	0	0	0	0	0	0	0	0	0	0	0	0	0	0	0	0	0	0	0	0	0	0
RPS_01	2.58	2.84	5.23	8.1	1.21	3909.572754	20930.545	81.3825	1.1302	4.2354	5.6531	0.481	0	0	0	0.9876	5.7697	0	0.3604	0	0	0	0	0	0	0	0	0	0	0	0	0	0	0	0	0	0	0	0	0	0	0	0	0	0	0	0	0	0
RPS_01	4.06	4.43	12.92	12.88	1.19	3918.854004	20928.37	68.0152	0.5249	2.4904	13.903	0.6419	0	0	0	0.5521	13.8725	0	0	0	0	0	0	0	0	0	0	0	0	0	0	0	0	0	0	0	0	0	0	0	0	0	0	0	0	0	0	0	0
RPS_01	5.58	6.54	24.45	21.85	1.37	3921.464355	20916.19	56.5311	0.7407	8.8685	14.7464	1.4036	0	0	0	1.3014	16.0445	0	0.3638	0	0	0	0	0	0	0	0	0	0	0	0	0	0	0	0	0	0	0	0	0	0	0	0	0	0	0	0	0	0
RPS_01	3.09	3.58	7.52	10.56	1.34	3978.74707	20910.1	83.0438	1.1049	4.8984	4.6778	0.5004	0	0	0	0.5225	5.0678	0	0.1844	0	0	0	0	0	0	0	0	0	0	0	0	0	0	0	0	0	0	0	0	0	0	0	0	0	0	0	0	0	0
RPS_01	4.23	5.19	14.03	14.32	1.51	3912.038086	20908.505	59.5909	1.7821	23.9188	0.1436	0.2007	2.9687	10.693	0	0	0	0	0	0	0	0	0	0.7022	0	0	0	0	0	0	0	0	0	0	0	0	0	0	0	0	0	0	0	0	0	0	0	0	0
RPS_01	2.4	2.64	4.52	7.81	1.21	3991.653809	20904.59	89.0721	1.1852	4.7915	2.1308	0.3031	0	0	0	0.4303	2.087	0	0	0	0	0	0	0	0	0	0	0	0	0	0	0	0	0	0	0	0	0	0	0	0	0	0	0	0	0	0	0	0
RPS_01	4.97	5.99	19.36	16.2	1.46	3919.869141	20902.6325	66.4826	0.6287	6.6912	11.0458	1.3997	0	0	0	1.3648	12.032	0	0.3553	0	0	0	0	0	0	0	0	0	0	0	0	0	0	0	0	0	0	0	0	0	0	0	0	0	0	0	0	0	0
RPS_01	3.85	4.4	11.66	12.59	1.3	3931.398193	20890.5975	73.9455	0.6722	4.0386	9.6497	0.5492	0	0	0	0.8261	9.9523	0	0.3664	0	0	0	0	0	0	0	0	0	0	0	0	0	0	0	0	0	0	0	0	0	0	0	0	0	0	0	0	0	0
RPS_01	4.1	5.83	13.23	17.07	2.02	3948.728027	20890.09	77.3906	1.5871	10.6922	1.7053	0.2854	1.567	2.0464	0	0.9629	1.9703	0.3253	1.1611	0	0	0	0	0.3064	0	0	0	0	0	0	0	0	0	0	0	0	0	0	0	0	0	0	0	0	0	0	0	0	0
RPS_01	3.42	4.52	9.21	12.01	1.74	3882.164063	20889.51	85.4042	1.4178	4.691	3.5964	0.2027	0	0	0	0.6636	3.6226	0	0.4016	0	0	0	0	0	0	0	0	0	0	0	0	0	0	0	0	0	0	0	0	0	0	0	0	0	0	0	0	0	0
RPS_01	3.89	4.63	11.87	13.31	1.42	3892.460449	20887.19	73.1853	0.9785	4.8714	9.5149	0.697	0	0	0	0.7752	9.7174	0	0.2603	0	0	0	0	0	0	0	0	0	0	0	0	0	0	0	0	0	0	0	0	0	0	0	0	0	0	0	0	0	0
RPS_01	6.2	7.09	30.21	21.41	1.31	3983.242676	21109.9975	48.8594	2.2733	31.3035	0.159	0.8632	5.7366	6.6285	0	0.3672	0	0.5116	0	0	0	0	0	3.2976	0	0	0	0	0	0	0	0	0	0	0	0	0	0	0	0	0	0	0	0	0	0	0	0	0
RPS_01	4.74	6.34	17.63	16.49	1.79	3857.075684	21102.965	69.461	0.7801	3.5538	12.7259	0.4137	0	0	0	0.2507	12.8147	0	0	0	0	0	0	0	0	0	0	0	0	0	0	0	0	0	0	0	0	0	0	0	0	0	0	0	0	0	0	0	0
RPS_01	3.61	4.26	10.26	12.59	1.39	3879.69873	21086.29	74.0283	1.0153	7.8361	6.436	1.4212	0	0	0	1.1686	7.6737	0	0.4208	0	0	0	0	0	0	0	0	0	0	0	0	0	0	0	0	0	0	0	0	0	0	0	0	0	0	0	0	0	0
RPS_01	2.98	3.3	6.97	9.98	1.23	3861.571289	21079.765	84.1916	0.987	5.0718	4.1616	0.5371	0	0	0	0.5432	4.3132	0	0.1947	0	0	0	0	0	0	0	0	0	0	0	0	0	0	0	0	0	0	0	0	0	0	0	0	0	0	0	0	0	0
RPS_01	2.81	3.39	6.2	9.4	1.45	3957.574219	21071.065	85.1122	1.3959	5.2238	3.5922	0.1429	0	0	0	0.614	3.4639	0	0.4552	0	0	0	0	0	0	0	0	0	0	0	0	0	0	0	0	0	0	0	0	0	0	0	0	0	0	0	0	0	0
RPS_01	4.1	4.95	13.21	14.32	1.46	3889.850098	21040.035	71.6623	0.7229	4.1778	11.0858	0.6574	0	0.1275	0	0.2691	11.2973	0	0	0	0	0	0	0	0	0	0	0	0	0	0	0	0	0	0	0	0	0	0	0	0	0	0	0	0	0	0	0	0
RPS_01	2.47	2.61	4.79	7.67	1.11	3946.262695	21020.17	87.6881	1.2522	4.2577	2.8991	0.3686	0	0	0	0.598	2.9363	0	0	0	0	0	0	0	0	0	0	0	0	0	0	0	0	0	0	0	0	0	0	0	0	0	0	0	0	0	0	0	0
RPS_01	5.48	7.1	23.59	24.31	1.68	3902.611816	21013.4275	61.6565	1.8449	22.0448	0	0.4112	4.4344	8.2091	0	0	0	0.2106	0.2513	0.1832	0	0	0	0.7539	0	0	0	0	0	0	0	0	0	0	0	0	0	0	0	0	0	0	0	0	0	0	0	0	0
RPS_01	3.17	3.5	7.91	10.13	1.21	3939.156738	21007.12	76.3345	0.8951	4.0729	8.6714	0.4173	0	0	0	0.3706	9.2381	0	0	0	0	0	0	0	0	0	0	0	0	0	0	0	0	0	0	0	0	0	0	0	0	0	0	0	0	0	0	0	0
RPS_01	4.32	4.81	14.65	14.18	1.24	3865.196777	21218.835	68.6207	0.9884	7.5391	9.009	1.453	0	0	0	1.6798	9.9855	0.163	0.5614	0	0	0	0	0	0	0	0	0	0	0	0	0	0	0	0	0	0	0	0	0	0	0	0	0	0	0	0	0	0
RPS_01	2.52	2.84	4.98	8.54	1.27	3931.180664	21217.385	82.6081	0.9926	5.7557	4.2294	0.8007	0	0	0	0.9255	4.3497	0	0.3383	0	0	0	0	0	0	0	0	0	0	0	0	0	0	0	0	0	0	0	0	0	0	0	0	0	0	0	0	0	0
RPS_01	3.33	3.86	8.73	11	1.34	3884.049316	21214.63	78.4622	0.914	6.1389	6.1064	0.5691	0	0	0	0.9513	6.4905	0	0.3676	0	0	0	0	0	0	0	0	0	0	0	0	0	0	0	0	0	0	0	0	0	0	0	0	0	0	0	0	0	0
RPS_01	4.83	6.45	18.3	17.07	1.78	3921.464355	21213.47	59.9804	4.7279	19.9959	0	0.8124	1.3761	2.0716	0	0	0	0.1718	0	5.8071	0	0	0	5.0569	0	0	0	0	0	0	0	0	0	0	0	0	0	0	0	0	0	0	0	0	0	0	0	0	0
RPS_01	4.94	6.26	19.2	17.22	1.6	3875.638184	21208.6125	64.2477	2.1911	21.1251	0.1852	0.3047	4.5435	6.0693	0	0	0	0.5833	0	0	0	0	0	0.7502	0	0	0	0	0	0	0	0	0	0	0	0	0	0	0	0	0	0	0	0	0	0	0	0	0
RPS_01	3.6	3.92	10.2	11.72	1.18	3964.970215	21208.975	73.8567	0.6651	3.7582	10.1149	0.4462	0	0	0	0.4935	10.4958	0	0.1696	0	0	0	0	0	0	0	0	0	0	0	0	0	0	0	0	0	0	0	0	0	0	0	0	0	0	0	0	0	0
RPS_01	5.97	9.69	27.97	20.69	2.63	3929.875488	21203.175	65.1022	2.0738	21.4315	0.3682	0.1066	0.4404	10.2767	0	0	0	0	0	0	0	0	0	0.2007	0	0	0	0	0	0	0	0	0	0	0	0	0	0	0	0	0	0	0	0	0	0	0	0	0
RPS_01	4.42	8.09	15.32	29.95	3.35	3901.886719	21200.0575	88.3346	2.0721	3.2407	3.207	0	0	0	0	0	3.1456	0	0	0	0	0	0	0	0	0	0	0	0	0	0	0	0	0	0	0	0	0	0	0	0	0	0	0	0	0	0	0	0
RPS_01	1.39	1.69	1.53	4.63	1.47	3902.321777	21199.0425	94.5092	0.6097	2.0786	1.441	0	0	0	0	0	1.3615	0	0	0	0	0	0	0	0	0	0	0	0	0	0	0	0	0	0	0	0	0	0	0	0	0	0	0	0	0	0	0	0
RPS_01	3.6	5.41	10.15	20.11	2.26	3899.566406	21195.345	86.4472	1.6914	8.7371	0.5477	0.4596	0	0	0	1.1862	0.3079	0	0.6229	0	0	0	0	0	0	0	0	0	0	0	0	0	0	0	0	0	0	0	0	0	0	0	0	0	0	0	0	0	0
RPS_01	5.35	6	22.5	17.65	1.25	3916.678711	21191.6475	54.7479	1.7339	25.1495	0.1367	0.3393	1.5966	14.2417	0	0	0.2234	0.2484	0.9433	0	0	0	0	0.6392	0	0	0	0	0	0	0	0	0	0	0	0	0	0	0	0	0	0	0	0	0	0	0	0	0
RPS_01	2.51	3.2	4.94	9.55	1.62	3869.257324	21190.705	85.2854	1.1842	4.5437	4.1111	0.3353	0	0	0	0.3237	4.2166	0	0	0	0	0	0	0	0	0	0	0	0	0	0	0	0	0	0	0	0	0	0	0	0	0	0	0	0	0	0	0	0
RPS_01	2.79	3.41	6.09	9.4	1.5	3901.669189	21187.8775	80.7459	1.0405	4.7524	5.7589	0.6739	0	0	0	0.7994	5.9231	0	0.3059	0	0	0	0	0	0	0	0	0	0	0	0	0	0	0	0	0	0	0	0	0	0	0	0	0	0	0	0	0	0
RPS_01	2.05	2.39	3.29	6.66	1.36	3935.821289	21187.225	88.1735	0.873	3.7218	3.3534	0.2422	0	0	0	0.2498	3.3863	0	0	0	0	0	0	0	0	0	0	0	0	0	0	0	0	0	0	0	0	0	0	0	0	0	0	0	0	0	0	0	0
RPS_01	2.34	2.53	4.31	7.38	1.16	3929.29541	21174.175	86.1681	1.0316	5.3438	2.939	0.5755	0	0	0	0.648	2.9926	0	0.3014	0	0	0	0	0	0	0	0	0	0	0	0	0	0	0	0	0	0	0	0	0	0	0	0	0	0	0	0	0	0
RPS_01	2.27	3.17	4.06	8.25	1.95	3919.434082	21164.17	91.27	1.2318	4.188	1.3361	0.3482	0	0	0	0.2899	1.3361	0	0	0	0	0	0	0	0	0	0	0	0	0	0	0	0	0	0	0	0	0	0	0	0	0	0	0	0	0	0	0	0
RPS_01	2.51	2.98	4.96	8.54	1.41	3869.547363	21162.72	87.3629	1.2288	5.2861	2.3655	0.4785	0	0	0	0.5889	2.4485	0	0.2407	0	0	0	0	0	0	0	0	0	0	0	0	0	0	0	0	0	0	0	0	0	0	0	0	0	0	0	0	0	0
RPS_01	3.54	4	9.82	11.72	1.28	3966.130371	21152.86	72.5892	0.9102	4.1485	10.5104	0.3594	0	0	0	0.364	11.1183	0	0	0	0	0	0	0	0	0	0	0	0	0	0	0	0	0	0	0	0	0	0	0	0	0	0	0	0	0	0	0	0
RPS_01	3.27	3.57	8.42	10.85	1.19	3944.66748	21140.535	76.582	1.0316	3.7356	8.7339	0.4058	0	0	0	0.338	9.1731	0	0	0	0	0	0	0	0	0	0	0	0	0	0	0	0	0	0	0	0	0	0	0	0	0	0	0	0	0	0	0	0
RPS_01	7.56	10.84	44.88	33.71	2.06	3975.121582	21135.75	61.1301	0.7961	18.674	3.5808	0.3837	5.039	5.2949	0	0.2882	3.5508	0.7426	0.2061	0	0	0	0	0.3135	0	0	0	0	0	0	0	0	0	0	0	0	0	0	0	0	0	0	0	0	0	0	0	0	0
RPS_01	2.42	2.85	4.61	7.67	1.39	3998.179688	21139.085	87.9196	1.6581	4.8984	2.3891	0.3512	0	0	0	0.303	2.4807	0	0	0	0	0	0	0	0	0	0	0	0	0	0	0	0	0	0	0	0	0	0	0	0	0	0	0	0	0	0	0	0
RPS_01	8.26	11.32	53.59	29.23	1.88	3890.865234	21132.705	49.4357	1.9356	31.2228	0.1468	0	0.3505	16.9087	0	0	0	0	0	0	0	0	0	0	0	0	0	0	0	0	0	0	0	0	0	0	0	0	0	0	0	0	0	0	0	0	0	0	0
RPS_01	3.69	4.49	10.68	15.05	1.48	3865.776855	21135.895	79.9136	0.9814	4.4301	6.5891	0.4371	0	0	0	0.4384	7.2104	0	0	0	0	0	0	0	0	0	0	0	0	0	0	0	0	0	0	0	0	0	0	0	0	0	0	0	0	0	0	0	0
RPS_01	5.11	5.93	20.54	18.09	1.35	3870.41748	21122.3375	56.623	0	10.2297	12.0607	1.2697	0.858	3.9312	0	0.7111	13.155	0.2779	0.6187	0	0	0	0	0.265	0	0	0	0	0	0	0	0	0	0	0	0	0	0	0	0	0	0	0	0	0	0	0	0	0
RPS_01	5.49	7.16	23.68	23.58	1.7	3995.859375	21118.7125	64.8966	1.1884	13.7206	6.6309	0.4493	0.8218	5.0829	0	0.4337	6.7757	0	0	0	0	0	0	0	0	0	0	0	0	0	0	0	0	0	0	0	0	0	0	0	0	0	0	0	0	0	0	0	0
RPS_01	4.08	4.69	13.04	13.75	1.32	4138.203613	21221.3	66.1984	0.6319	10.0002	7.4695	0.871	1.9392	3.5281	0	0.4672	7.8041	0.3241	0.2477	0	0	0	0	0.5186	0	0	0	0	0	0	0	0	0	0	0	0	0	0	0	0	0	0	0	0	0	0	0	0	0
RPS_01	2.97	3.34	6.91	10.13	1.27	4049.59668	21217.24	75.9583	0.9576	6.3455	6.6551	0.9374	0	0	0	0.9117	7.8898	0	0.3446	0	0	0	0	0	0	0	0	0	0	0	0	0	0	0	0	0	0	0	0	0	0	0	0	0	0	0	0	0	0
RPS_01	1.85	2.26	2.68	6.22	1.5	4091.797363	21216.08	86.1676	1.3351	7.874	0	0	0.6207	3.7285	0	0	0	0	0	0	0	0	0	0.274	0	0	0	0	0	0	0	0	0	0	0	0	0	0	0	0	0	0	0	0	0	0	0	0	0
RPS_01	3.76	4.44	11.1	12.15	1.39	4119.206055	21206.655	69.8842	0.9113	6.0051	9.7076	0.9958	0	0	0	1.1753	10.6794	0.155	0.4863	0	0	0	0	0	0	0	0	0	0	0	0	0	0	0	0	0	0	0	0	0	0	0	0	0	0	0	0	0	0
RPS_01	3.48	3.76	9.53	11	1.17	4036.689941	21204.045	72.6953	0.699	5.238	9.5738	0.8243	0	0	0	0.8277	9.9515	0	0.1904	0	0	0	0	0	0	0	0	0	0	0	0	0	0	0	0	0	0	0	0	0	0	0	0	0	0	0	0	0	0
RPS_01	4.41	5.14	15.28	15.05	1.36	4108.909668	21203.465	56.8786	1.6611	23.4969	0	0.1731	4.0044	10.4555	0	0	0	2.4606	0	0	0	0	0	0.6115	0.2583	0	0	0	0	0	0	0	0	0	0	0	0	0	0	0	0	0	0	0	0	0	0	0	0
RPS_01	3.9	4.6	11.93	13.46	1.39	4116.885742	21196.505	68.0716	1.2554	6.7684	10.1111	1.0353	0	0	0	1.2634	11.1252	0	0.3698	0	0	0	0	0	0	0	0	0	0	0	0	0	0	0	0	0	0	0	0	0	0	0	0	0	0	0	0	0	0
RPS_01	2.81	3.02	6.2	8.83	1.16	4041.040527	21193.315	86.0409	1.7889	9.052	0	0.2715	0.6858	1.755	0	0	0	0	0	0	0	0	0	0.4058	0	0	0	0	0	0	0	0	0	0	0	0	0	0	0	0	0	0	0	0	0	0	0	0	0
RPS_01	3.15	3.63	7.79	10.13	1.33	4134.288086	21185.63	79.6848	1.0922	6.4811	5.0444	0.8585	0	0	0	0.9542	5.6099	0	0.2749	0	0	0	0	0	0	0	0	0	0	0	0	0	0	0	0	0	0	0	0	0	0	0	0	0	0	0	0	0	0
RPS_01	4.2	4.64	13.88	15.48	1.22	4056.847656	21175.915	67.0011	0.7555	5.3899	12.1129	0.7801	0	0	0	0.9285	12.569	0.1909	0.2721	0	0	0	0	0	0	0	0	0	0	0	0	0	0	0	0	0	0	0	0	0	0	0	0	0	0	0	0	0	0
RPS_01	3.55	4.07	9.9	11.72	1.32	4087.156738	21173.595	62.6585	1.8466	22.4634	0	0.9719	4.0889	6.928	0	0	0	0.3478	0	0	0	0	0	0.6948	0	0	0	0	0	0	0	0	0	0	0	0	0	0	0	0	0	0	0	0	0	0	0	0	0
RPS_01	4.44	5.16	15.47	14.61	1.35	4086.286621	21161.9225	64.1509	0	2.9374	15.1276	0.5993	0	0	0	0.9874	15.7764	0	0.4209	0	0	0	0	0	0	0	0	0	0	0	0	0	0	0	0	0	0	0	0	0	0	0	0	0	0	0	0	0	0
RPS_01	1.9	2.34	2.83	6.22	1.52	4028.278809	21156.775	90.8013	0.9272	4.0724	1.7987	0.2764	0	0	0	0.2114	1.9126	0	0	0	0	0	0	0	0	0	0	0	0	0	0	0	0	0	0	0	0	0	0	0	0	0	0	0	0	0	0	0	0
RPS_01	4.67	5.78	17.1	16.49	1.54	4007.105957	21151.265	67.4692	1.851	19.5486	0	0.7288	2.2693	4.6877	0	0	0.1919	0	2.4282	0	0	0	0	0.8252	0	0	0	0	0	0	0	0	0	0	0	0	0	0	0	0	0	0	0	0	0	0	0	0	0
RPS_01	2.29	2.7	4.1	7.67	1.4	4002.320313	21144.45	89.9758	1.526	4.4843	1.7969	0.2281	0	0	0	0.208	1.7808	0	0	0	0	0	0	0	0	0	0	0	0	0	0	0	0	0	0	0	0	0	0	0	0	0	0	0	0	0	0	0	0
RPS_01	2.56	2.93	5.15	8.54	1.31	4071.349609	21130.24	82.0559	1.2099	4.908	4.7807	0.6051	0	0	0	0.9555	5.1644	0	0.3206	0	0	0	0	0	0	0	0	0	0	0	0	0	0	0	0	0	0	0	0	0	0	0	0	0	0	0	0	0	0
RPS_01	5.9	7.24	27.3	20.26	1.51	4133.998047	21122.3375	56.3088	1.9283	25.7434	0	0.7775	5.0662	7.9338	0	0	0	0.5884	0.4293	0	0	0	0	1.2241	0	0	0	0	0	0	0	0	0	0	0	0	0	0	0	0	0	0	0	0	0	0	0	0	0
RPS_01	2.49	2.88	4.88	8.1	1.34	4108.039551	21122.845	81.0939	0.9235	5.5201	4.9873	0.7424	0	0	0	0.8778	5.5668	0	0.2882	0	0	0	0	0	0	0	0	0	0	0	0	0	0	0	0	0	0	0	0	0	0	0	0	0	0	0	0	0	0
RPS_01	6.3	10.67	31.15	32.84	2.87	4162.501953	21216.1525	75.7028	0	5.517	8.5874	0.6865	0	0	0	0.3947	9.1117	0	0	0	0	0	0	0	0	0	0	0	0	0	0	0	0	0	0	0	0	0	0	0	0	0	0	0	0	0	0	0	0
RPS_01	3.92	4.78	12.06	13.75	1.49	4212.89624	21217.675	71.6619	0.6418	6.1385	9.2753	0.6506	0.3912	1.0734	0	0.381	9.7863	0	0	0	0	0	0	0	0	0	0	0	0	0	0	0	0	0	0	0	0	0	0	0	0	0	0	0	0	0	0	0	0
RPS_01	3.09	3.48	7.52	14.47	1.26	4170.478027	21206.22	86.0573	1.1942	5.875	2.6582	0.5309	0	0	0	0.6345	2.7829	0	0.267	0	0	0	0	0	0	0	0	0	0	0	0	0	0	0	0	0	0	0	0	0	0	0	0	0	0	0	0	0	0
RPS_01	5.45	8.81	23.3	24.89	2.62	4160.036621	21199.4775	83.5954	2.2198	11.3037	0	0.1441	0.9516	1.4986	0	0	0	0	0	0	0	0	0	0.2868	0	0	0	0	0	0	0	0	0	0	0	0	0	0	0	0	0	0	0	0	0	0	0	0	0
RPS_01	1.74	2.64	2.39	7.09	2.29	4158.731445	21189.545	92.2546	1.1942	4.2668	1.1618	0	0	0	0	0	1.1227	0	0	0	0	0	0	0	0	0	0	0	0	0	0	0	0	0	0	0	0	0	0	0	0	0	0	0	0	0	0	0	0
RPS_01	6.06	7.02	28.83	26.04	1.34	4198.611816	21155.1075	61.4691	0.9227	15.2714	6.5028	0.6143	2.0732	4.1281	0	0.5714	6.9331	0.3369	0.5558	0	0	0	0	0.6213	0	0	0	0	0	0	0	0	0	0	0	0	0	0	0	0	0	0	0	0	0	0	0	0	0
RPS_01	4.72	5.52	17.52	16.64	1.36	4237.62207	21152.2075	70.8967	1.0565	6.7671	9.4299	0.6553	0	0	0	1.1532	9.6014	0	0.4399	0	0	0	0	0	0	0	0	0	0	0	0	0	0	0	0	0	0	0	0	0	0	0	0	0	0	0	0	0	0
RPS_01	2.66	2.95	5.57	8.97	1.23	4187.300293	21152.425	80.645	1.0382	5.3373	5.7717	0.4621	0	0	0	0.5524	5.9846	0	0.2087	0	0	0	0	0	0	0	0	0	0	0	0	0	0	0	0	0	0	0	0	0	0	0	0	0	0	0	0	0	0
RPS_01	6.22	8.23	30.42	22.28	1.75	4203.6875	21149.8875	59.7822	0	4.9933	16.1528	0.7126	0	0	0	0.5691	17.1055	0.1588	0.2384	0	0	0	0	0	0.2873	0	0	0	0	0	0	0	0	0	0	0	0	0	0	0	0	0	0	0	0	0	0	0	0
RPS_01	13.18	21.71	136.39	137.02	2.71	4267.061035	21140.7525	67.1757	1.7694	20.5694	0.373	0.3454	1.1566	7.7277	0	0	0.2775	0	0	0	0	0	0	0.6052	0	0	0	0	0	0	0	0	0	0	0	0	0	0	0	0	0	0	0	0	0	0	0	0	0
RPS_01	0.94	1.29	0.69	3.04	1.9	4259.22998	21141.3325	92.9011	1.0513	4.8691	0	0	0	1.1785	0	0	0	0	0	0	0	0	0	0	0	0	0	0	0	0	0	0	0	0	0	0	0	0	0	0	0	0	0	0	0	0	0	0	0
RPS_01	4.11	4.63	13.27	13.02	1.27	4175.84375	21135.75	70.26	0.5748	4.8522	10.7976	0.7217	0	0	0	0.9284	11.6128	0	0.2526	0	0	0	0	0	0	0	0	0	0	0	0	0	0	0	0	0	0	0	0	0	0	0	0	0	0	0	0	0	0
RPS_01	5.64	8.02	25.02	20.98	2.02	4217.174316	21132.6325	57.289	1.8426	21.9562	0.1745	0.1321	4.2959	11.0984	0	0	0	3.2112	0	0	0	0	0	0	0	0	0	0	0	0	0	0	0	0	0	0	0	0	0	0	0	0	0	0	0	0	0	0	0
RPS_01	2.09	2.43	3.43	7.23	1.35	4240.8125	21130.095	89.3662	1.292	5.7717	1.2038	0.3304	0	0	0	0.6022	1.1954	0	0.2382	0	0	0	0	0	0	0	0	0	0	0	0	0	0	0	0	0	0	0	0	0	0	0	0	0	0	0	0	0	0
RPS_01	3.39	3.79	9.04	11.29	1.25	4254.299316	21124.585	73.8749	0.6111	3.5827	10.4592	0.2647	0	0	0	0.2688	10.9386	0	0	0	0	0	0	0	0	0	0	0	0	0	0	0	0	0	0	0	0	0	0	0	0	0	0	0	0	0	0	0	0
RPS_01	3.63	6.21	10.36	22.28	2.93	4433.478516	21226.3025	91.1027	2.1553	3.8907	1.4077	0	0	0	0	0	1.4436	0	0	0	0	0	0	0	0	0	0	0	0	0	0	0	0	0	0	0	0	0	0	0	0	0	0	0	0	0	0	0	0
RPS_01	3.2	5.7	8.02	14.76	3.18	4436.378906	21224.49	92.5485	2.129	3.7593	0.7553	0	0	0	0	0	0.8079	0	0	0	0	0	0	0	0	0	0	0	0	0	0	0	0	0	0	0	0	0	0	0	0	0	0	0	0	0	0	0	0
RPS_01	1.77	2.05	2.45	5.79	1.34	4434.638672	21225.36	93.101	1.0473	2.3913	1.6302	0	0	0	0	0	1.8302	0	0	0	0	0	0	0	0	0	0	0	0	0	0	0	0	0	0	0	0	0	0	0	0	0	0	0	0	0	0	0	0
RPS_01	3.45	4.57	9.34	11.86	1.76	4314.127441	21220.43	79.1095	0.8529	4.5964	6.8322	0.5875	0	0	0	0.545	7.4765	0	0	0	0	0	0	0	0	0	0	0	0	0	0	0	0	0	0	0	0	0	0	0	0	0	0	0	0	0	0	0	0
RPS_01	4.44	5.57	15.45	22.28	1.58	4417.091309	21214.63	68.1015	1.6204	17.7116	2.1007	2.3325	0.7552	1.6069	0	0.1629	2.0984	0	3.2597	0	0	0	0	0.2501	0	0	0	0	0	0	0	0	0	0	0	0	0	0	0	0	0	0	0	0	0	0	0	0	0
RPS_01	2.99	3.39	7.03	9.69	1.28	4413.320801	21200.71	79.1013	0.9978	5.0398	6.6416	0.4183	0	0	0	0.5343	7.1015	0	0.1655	0	0	0	0	0	0	0	0	0	0	0	0	0	0	0	0	0	0	0	0	0	0	0	0	0	0	0	0	0	0
RPS_01	3.47	4.49	9.48	12.01	1.67	4419.121582	21197.085	76.7616	0.9229	6.1697	6.8534	0.8333	0	0	0	0.8998	7.21	0	0.3494	0	0	0	0	0	0	0	0	0	0	0	0	0	0	0	0	0	0	0	0	0	0	0	0	0	0	0	0	0	0
RPS_01	5.45	7.38	23.32	20.69	1.83	4336.605469	21183.2375	64.917	2.0861	19.4262	0	0.217	3.4552	7.4034	0	0	0	0.3582	0.2117	0.5523	0	0	0	1.373	0	0	0	0	0	0	0	0	0	0	0	0	0	0	0	0	0	0	0	0	0	0	0	0	0
RPS_01	2.59	2.78	5.28	8.39	1.15	4309.921875	21184.615	83.4337	1.1883	5.3811	4.0358	0.591	0	0	0	0.5398	4.5712	0	0.2592	0	0	0	0	0	0	0	0	0	0	0	0	0	0	0	0	0	0	0	0	0	0	0	0	0	0	0	0	0	0
RPS_01	2.42	2.78	4.58	9.4	1.33	4406.722412	21178.235	90.8052	1.175	4.0854	1.9838	0	0	0	0	0	1.9505	0	0	0	0	0	0	0	0	0	0	0	0	0	0	0	0	0	0	0	0	0	0	0	0	0	0	0	0	0	0	0	0
RPS_01	2.57	3.24	5.19	9.98	1.58	4415.496094	21177.655	89.3307	1.2776	6.6632	0.6321	0.4798	0	0	0	0.8741	0.4046	0	0.3379	0	0	0	0	0	0	0	0	0	0	0	0	0	0	0	0	0	0	0	0	0	0	0	0	0	0	0	0	0	0
RPS_01	1.4	1.79	1.55	4.63	1.62	4408.245117	21176.495	92.3722	1.0522	2.8516	1.8117	0	0	0	0	0	1.9123	0	0	0	0	0	0	0	0	0	0	0	0	0	0	0	0	0	0	0	0	0	0	0	0	0	0	0	0	0	0	0	0
RPS_01	4.38	11.03	15.07	33.42	6.34	4408.680176	21172.6525	90.9587	1.5924	4.2852	1.6227	0	0	0	0	0	1.5409	0	0	0	0	0	0	0	0	0	0	0	0	0	0	0	0	0	0	0	0	0	0	0	0	0	0	0	0	0	0	0	0
RPS_01	2.31	4.03	4.21	9.26	3.03	4409.695313	21173.885	91.7952	1.3686	3.0358	1.8737	0.1073	0	0	0	0	1.8194	0	0	0	0	0	0	0	0	0	0	0	0	0	0	0	0	0	0	0	0	0	0	0	0	0	0	0	0	0	0	0	0
RPS_01	1.68	2.07	2.22	5.35	1.52	4406.939941	21174.175	90.6238	0.8264	2.1762	3.0561	0	0	0	0	0	3.3176	0	0	0	0	0	0	0	0	0	0	0	0	0	0	0	0	0	0	0	0	0	0	0	0	0	0	0	0	0	0	0	0
RPS_01	3.37	4.35	8.94	11.14	1.66	4318.187988	21170.26	67.2842	1.5692	18.0411	0	0.9541	3.2908	6.6329	0	0.1948	0.1729	0.3472	0.6339	0	0	0	0	0.8791	0	0	0	0	0	0	0	0	0	0	0	0	0	0	0	0	0	0	0	0	0	0	0	0	0
RPS_01	4.99	5.59	19.59	17.22	1.25	4361.838867	21160.69	55.1404	2.0196	26.2994	0.1469	0.3766	3.6532	11.1029	0	0	0	0.3018	0	0	0	0	0	0.9592	0	0	0	0	0	0	0	0	0	0	0	0	0	0	0	0	0	0	0	0	0	0	0	0	0
RPS_01	5.09	5.37	20.33	16.78	1.11	4432.898438	21153.585	67.8696	0	7.5907	10.3213	1.1204	0	0	0	1.4895	10.9566	0.1703	0.4816	0	0	0	0	0	0	0	0	0	0	0	0	0	0	0	0	0	0	0	0	0	0	0	0	0	0	0	0	0	0
RPS_01	4.8	5.77	18.07	16.2	1.45	4355.022949	21152.2075	47.4162	2.3964	32.5839	0.1248	0.3775	5.8739	9.7783	0	0	0	0.2604	0	0	0	0	0	1.1886	0	0	0	0	0	0	0	0	0	0	0	0	0	0	0	0	0	0	0	0	0	0	0	0	0
RPS_01	2.35	2.91	4.35	9.26	1.53	4418.976563	21147.785	90.6425	1.2736	3.9803	1.9052	0.1145	0	0	0	0	2.0839	0	0	0	0	0	0	0	0	0	0	0	0	0	0	0	0	0	0	0	0	0	0	0	0	0	0	0	0	0	0	0	0
RPS_01	4.06	4.9	12.94	13.46	1.46	4308.036621	21142.855	66.2966	0.732	7.8479	9.7922	1.5001	0	0	0	1.673	11.3344	0.1926	0.6312	0	0	0	0	0	0	0	0	0	0	0	0	0	0	0	0	0	0	0	0	0	0	0	0	0	0	0	0	0	0
RPS_01	3.72	4.41	10.89	11.43	1.4	4323.263672	21136.62	74.6166	0.9848	6.8499	6.9245	0.6764	0	0	0	1.1046	8.0064	0.2196	0.6172	0	0	0	0	0	0	0	0	0	0	0	0	0	0	0	0	0	0	0	0	0	0	0	0	0	0	0	0	0	0
RPS_01	1.9	2.46	2.83	7.67	1.68	4309.921875	21136.765	91.0154	1.2781	4.1677	1.7442	0	0	0	0	0	1.7946	0	0	0	0	0	0	0	0	0	0	0	0	0	0	0	0	0	0	0	0	0	0	0	0	0	0	0	0	0	0	0	0
RPS_01	1.91	3.11	2.87	7.67	2.64	4333.560059	21120.525	92.3997	1.1028	3.0331	1.6355	0	0	0	0	0	1.8289	0	0	0	0	0	0	0	0	0	0	0	0	0	0	0	0	0	0	0	0	0	0	0	0	0	0	0	0	0	0	0	0
RPS_01	1.62	2.21	2.07	5.21	1.86	4335.155273	21113.4775	93.4801	1.1746	2.5712	1.3084	0	0	0	0	0	1.4658	0	0	0	0	0	0	0	0	0	0	0	0	0	0	0	0	0	0	0	0	0	0	0	0	0	0	0	0	0	0	0	0
RPS_01	1.77	2.73	2.47	6.66	2.37	4333.705078	21111.665	94.3339	1.1961	2.6169	0.8974	0	0	0	0	0	0.9558	0	0	0	0	0	0	0	0	0	0	0	0	0	0	0	0	0	0	0	0	0	0	0	0	0	0	0	0	0	0	0	0
RPS_01	3.7	4.43	10.74	13.02	1.43	4331.819824	21104.415	80.8142	0.9419	4.7949	6.0516	0.4049	0	0	0	0.4516	6.5409	0	0	0	0	0	0	0	0	0	0	0	0	0	0	0	0	0	0	0	0	0	0	0	0	0	0	0	0	0	0	0	0
RPS_01	3.58	4.34	10.05	13.75	1.47	4343.421387	21099.775	77.0608	0.8407	5.1162	7.644	0.6031	0	0	0	0.2286	8.5066	0	0	0	0	0	0	0	0	0	0	0	0	0	0	0	0	0	0	0	0	0	0	0	0	0	0	0	0	0	0	0	0
RPS_01	2.66	3.2	5.55	8.97	1.45	4339.36084	21097.89	90.9206	1.1896	3.0963	2.3331	0.1162	0	0	0	0	2.3441	0	0	0	0	0	0	0	0	0	0	0	0	0	0	0	0	0	0	0	0	0	0	0	0	0	0	0	0	0	0	0	0
RPS_01	2.94	3.73	6.8	11.14	1.61	4324.206299	21092.3075	85.8753	0.8889	5.6206	3.0792	0.5479	0	0	0	0.4834	3.5047	0	0	0	0	0	0	0	0	0	0	0	0	0	0	0	0	0	0	0	0	0	0	0	0	0	0	0	0	0	0	0	0
RPS_01	1.88	3.16	2.76	6.51	2.84	4317.462891	21090.205	92.0484	1.2274	3.2121	1.7076	0	0	0	0	0	1.8045	0	0	0	0	0	0	0	0	0	0	0	0	0	0	0	0	0	0	0	0	0	0	0	0	0	0	0	0	0	0	0	0
RPS_01	2.12	3.12	3.52	7.81	2.17	4319.493164	21088.03	91.1121	1.0685	2.5744	2.5285	0	0	0	0	0	2.7165	0	0	0	0	0	0	0	0	0	0	0	0	0	0	0	0	0	0	0	0	0	0	0	0	0	0	0	0	0	0	0	0
RPS_01	1.7	2.98	2.28	7.09	3.06	4318.042969	21087.015	93.2727	0.6229	1.9266	1.9635	0	0	0	0	0	2.2143	0	0	0	0	0	0	0	0	0	0	0	0	0	0	0	0	0	0	0	0	0	0	0	0	0	0	0	0	0	0	0	0
RPS_01	7.42	10.28	43.21	28.65	1.92	4390.335205	21080.345	64.4417	1.9829	20.438	0.2756	0.5267	2.628	5.3737	0	0	0.3055	0.2391	3.089	0	0	0	0	0.6997	0	0	0	0	0	0	0	0	0	0	0	0	0	0	0	0	0	0	0	0	0	0	0	0	0
RPS_01	3.59	4	10.13	12.01	1.24	4306.586426	21065.265	74.6316	0.7359	7.2044	6.775	0.8112	0	0	0	1.462	7.6485	0.1808	0.5505	0	0	0	0	0	0	0	0	0	0	0	0	0	0	0	0	0	0	0	0	0	0	0	0	0	0	0	0	0	0
RPS_01	4.95	5.83	19.26	16.49	1.38	4375.615723	21064.105	60.0963	1.0495	13.2501	6.409	0.3888	0.9626	10.3778	0	0.5166	5.9748	0.225	0.3562	0	0	0	0	0.3932	0	0	0	0	0	0	0	0	0	0	0	0	0	0	0	0	0	0	0	0	0	0	0	0	0
RPS_01	5.73	6.59	25.79	22.14	1.32	4423.327148	21053.8825	67.731	0.7425	7.4014	9.6571	1.1912	0	0	0	1.6614	10.7902	0.2091	0.6163	0	0	0	0	0	0	0	0	0	0	0	0	0	0	0	0	0	0	0	0	0	0	0	0	0	0	0	0	0	0
RPS_01	3.38	4.49	8.96	12.01	1.77	4416.221191	21054.8975	84.1191	0.9654	2.8307	5.9668	0	0	0	0	0	6.118	0	0	0	0	0	0	0	0	0	0	0	0	0	0	0	0	0	0	0	0	0	0	0	0	0	0	0	0	0	0	0	0
RPS_01	2.15	2.39	3.64	6.66	1.23	4416.51123	21050.765	92.5196	1.211	2.9847	1.56	0	0	0	0	0	1.7247	0	0	0	0	0	0	0	0	0	0	0	0	0	0	0	0	0	0	0	0	0	0	0	0	0	0	0	0	0	0	0	0
RPS_01	4.87	6.43	18.65	17.22	1.74	4355.458008	21035.7575	55.2908	1.926	27.7103	0	0.2124	5.201	7.7116	0	0	0	0	0	0	0	0	0	1.9478	0	0	0	0	0	0	0	0	0	0	0	0	0	0	0	0	0	0	0	0	0	0	0	0	0
RPS_01	4.3	5.03	14.55	14.9	1.37	4328.484375	21036.265	68.494	0.6727	5.8223	10.6499	1.1339	0	0	0	1.1923	11.4479	0.1707	0.4163	0	0	0	0	0	0	0	0	0	0	0	0	0	0	0	0	0	0	0	0	0	0	0	0	0	0	0	0	0	0
RPS_01	2.54	2.84	5.07	8.39	1.25	4306.441406	21023.505	85.0803	1.3763	9.0691	0	0.3425	0.5618	1.2977	0	0	0	0	1.9454	0	0	0	0	0.3269	0	0	0	0	0	0	0	0	0	0	0	0	0	0	0	0	0	0	0	0	0	0	0	0	0
RPS_01	3.29	4.07	8.5	10.42	1.53	4334.430176	21021.04	86.4294	0.9935	3.5216	4.4079	0.1096	0	0	0	0	4.5379	0	0	0	0	0	0	0	0	0	0	0	0	0	0	0	0	0	0	0	0	0	0	0	0	0	0	0	0	0	0	0	0
RPS_01	3.33	3.66	8.71	10.85	1.21	4369.959961	21009.73	73.0612	0.813	3.9369	9.7323	0.6757	0	0	0	1.1578	10.2498	0	0.3733	0	0	0	0	0	0	0	0	0	0	0	0	0	0	0	0	0	0	0	0	0	0	0	0	0	0	0	0	0	0
RPS_01	5.24	6.59	21.54	19.1	1.58	4400.269043	20994.345	56.9652	1.091	19.588	3.9342	0.7188	4.2301	7.8697	0	0.1318	4.0965	0.3807	0	0	0	0	0	0.994	0	0	0	0	0	0	0	0	0	0	0	0	0	0	0	0	0	0	0	0	0	0	0	0	0
RPS_01	5.14	6.28	20.77	19.68	1.49	4312.097168	20984.1225	63.1192	1.8179	19.8582	2.1282	0.5354	3.5569	5.8615	0	0	2.2999	0.2608	0	0	0	0	0	0.562	0	0	0	0	0	0	0	0	0	0	0	0	0	0	0	0	0	0	0	0	0	0	0	0	0
RPS_01	5.58	6.82	24.43	25.18	1.5	4370.685059	20984.5575	63.3717	1.6658	21.3918	0.7109	4.1306	0.4779	2.1721	0	0.3202	0.715	0	4.7323	0	0	0	0	0.3117	0	0	0	0	0	0	0	0	0	0	0	0	0	0	0	0	0	0	0	0	0	0	0	0	0
RPS_01	3.69	4.12	10.72	14.03	1.24	4359.083496	20973.9	70.9826	1.5982	15.9001	0	0.7256	2.0073	3.8658	0	0	0.4357	0.4062	3.4277	0	0	0	0	0.6509	0	0	0	0	0	0	0	0	0	0	0	0	0	0	0	0	0	0	0	0	0	0	0	0	0
RPS_01	4.7	5.73	17.38	28.5	1.49	4431.303223	20967.0125	74.4321	0.7206	5.4532	8.4353	0.4012	0	0	0	0.839	9.3394	0	0.3792	0	0	0	0	0	0	0	0	0	0	0	0	0	0	0	0	0	0	0	0	0	0	0	0	0	0	0	0	0	0
RPS_01	3.8	4.35	11.35	12.88	1.31	4402.299316	20966.505	71.3055	1.5938	16.8136	0	0.3081	2.4081	5.3906	0	0	0	0.8177	0	0	0	0	0	1.3625	0	0	0	0	0	0	0	0	0	0	0	0	0	0	0	0	0	0	0	0	0	0	0	0	0
RPS_01	2.72	2.98	5.8	9.4	1.21	4314.70752	20961.285	81.402	0.7539	5.7885	4.9295	0.7699	0	0	0	0.7551	5.316	0	0.2851	0	0	0	0	0	0	0	0	0	0	0	0	0	0	0	0	0	0	0	0	0	0	0	0	0	0	0	0	0	0
RPS_01	4.97	6.99	19.36	19.97	1.98	4417.091309	20939.4625	76.7144	1.1072	7.1285	6.1537	0.3157	0.3877	0.5137	0	0.5979	6.5877	0	0.4934	0	0	0	0	0	0	0	0	0	0	0	0	0	0	0	0	0	0	0	0	0	0	0	0	0	0	0	0	0	0
RPS_01	4.51	5.31	15.95	15.19	1.39	4334.575195	20936.925	67.6461	0.7029	5.6437	11.5542	0.7633	0	0	0	0.7882	12.6325	0	0.269	0	0	0	0	0	0	0	0	0	0	0	0	0	0	0	0	0	0	0	0	0	0	0	0	0	0	0	0	0	0
RPS_01	4.61	6.34	16.68	17.51	1.89	4406.649902	20932.43	59.6992	2.009	22.1826	0.1076	0.2074	2.8548	10.1925	0	0	0	0.358	0	0.2262	0	0	0	2.1627	0	0	0	0	0	0	0	0	0	0	0	0	0	0	0	0	0	0	0	0	0	0	0	0	0
RPS_01	4.1	4.39	13.19	12.44	1.15	4304.411133	20925.905	70.3135	0.7344	3.9301	11.656	0.4722	0	0	0	0.8617	11.7736	0	0.2584	0	0	0	0	0	0	0	0	0	0	0	0	0	0	0	0	0	0	0	0	0	0	0	0	0	0	0	0	0	0
RPS_01	8.32	10.95	54.37	38.34	1.73	4416.366211	20921.9175	55.5317	1.3042	21.3102	3.3453	0.6	4.1246	7.3368	0	0.2593	3.4499	0.614	0.2814	0	0	0	0	1.5886	0.254	0	0	0	0	0	0	0	0	0	0	0	0	0	0	0	0	0	0	0	0	0	0	0	0
RPS_01	3.08	3.5	7.47	9.98	1.28	4435.653809	20920.83	81.7091	1.2101	3.9758	6.109	0.3184	0	0	0	0.2939	6.3837	0	0	0	0	0	0	0	0	0	0	0	0	0	0	0	0	0	0	0	0	0	0	0	0	0	0	0	0	0	0	0	0
RPS_01	2.03	2.32	3.24	7.09	1.3	4378.371094	20920.395	90.295	1.223	4.499	1.8466	0.1662	0	0	0	0	1.97	0	0	0	0	0	0	0	0	0	0	0	0	0	0	0	0	0	0	0	0	0	0	0	0	0	0	0	0	0	0	0	0
RPS_01	2.05	2.29	3.31	6.51	1.24	4381.416504	20917.35	86.2481	1.2238	4.4224	3.6972	0.3322	0	0	0	0.3139	3.7624	0	0	0	0	0	0	0	0	0	0	0	0	0	0	0	0	0	0	0	0	0	0	0	0	0	0	0	0	0	0	0	0
RPS_01	2.87	3.5	6.47	9.84	1.49	4346.031738	20907.49	83.0744	1.2765	4.6439	5.1012	0.3496	0	0	0	0.4172	5.1372	0	0	0	0	0	0	0	0	0	0	0	0	0	0	0	0	0	0	0	0	0	0	0	0	0	0	0	0	0	0	0	0
RPS_01	3.52	3.94	9.76	11.29	1.25	4357.343262	20899.37	74.4883	1.0034	6.7606	7.5363	0.8343	0	0	0	1.394	7.5538	0	0.4292	0	0	0	0	0	0	0	0	0	0	0	0	0	0	0	0	0	0	0	0	0	0	0	0	0	0	0	0	0	0
RPS_01	4.55	5.51	16.25	16.35	1.47	4394.178223	20894.005	55.8864	1.3846	22.2605	3.1893	0.9349	3.5731	7.3912	0	0.3262	2.7152	1.4906	0.2679	0	0	0	0	0.58	0	0	0	0	0	0	0	0	0	0	0	0	0	0	0	0	0	0	0	0	0	0	0	0	0
RPS_01	1.65	2.03	2.14	5.5	1.52	4399.108887	20890.09	90.6282	1.4	5.421	1.2067	0.1297	0	0	0	0.137	1.0774	0	0	0	0	0	0	0	0	0	0	0	0	0	0	0	0	0	0	0	0	0	0	0	0	0	0	0	0	0	0	0	0
RPS_01	2.16	2.75	3.66	7.38	1.62	4404.764648	20885.885	87.3506	1.0849	5.4958	2.8574	0.2587	0	0	0	0	2.9527	0	0	0	0	0	0	0	0	0	0	0	0	0	0	0	0	0	0	0	0	0	0	0	0	0	0	0	0	0	0	0	0
RPS_01	5.46	6.07	23.38	20.11	1.24	4376.920898	20881.3025	50.5215	1.7812	30.7135	0	0.2317	7.4958	7.6531	0	0	0	0.1981	0	0.3169	0	0	0	1.0881	0	0	0	0	0	0	0	0	0	0	0	0	0	0	0	0	0	0	0	0	0	0	0	0	0
RPS_01	4.5	5.65	15.93	16.2	1.57	4310.066895	20879.7075	68.7346	1.2588	15.2535	3.3544	0.7521	2.0484	3.7987	0	0.2535	3.5324	0.1817	0.2334	0	0	0	0	0.5983	0	0	0	0	0	0	0	0	0	0	0	0	0	0	0	0	0	0	0	0	0	0	0	0	0
RPS_01	1.97	2.15	3.04	6.22	1.2	4411.435547	20878.91	88.3647	1.4983	5.2906	2.271	0.1999	0	0	0	0	2.3755	0	0	0	0	0	0	0	0	0	0	0	0	0	0	0	0	0	0	0	0	0	0	0	0	0	0	0	0	0	0	0	0
RPS_01	5.98	7.67	28.07	23.58	1.65	4433.478516	20853.3175	52.46	1.0392	18.5894	7.1833	0.5196	4.65	6.4246	0	0.442	7.0163	0.4008	0.2541	0	0	0	0	0.8028	0.2178	0	0	0	0	0	0	0	0	0	0	0	0	0	0	0	0	0	0	0	0	0	0	0	0
RPS_01	4.28	4.85	14.38	14.18	1.28	4377.355957	20851.505	65.0992	0.5239	3.5386	14.7208	0.3582	0	0	0	0.581	14.9746	0	0.2036	0	0	0	0	0	0	0	0	0	0	0	0	0	0	0	0	0	0	0	0	0	0	0	0	0	0	0	0	0	0
RPS_01	3.74	6.41	10.99	18.38	2.93	4329.064453	20843.095	80.1812	1.5774	11.1285	0.1315	0.1232	0.3644	0.8061	0	2.9532	0	0.1529	2.5816	0	0	0	0	0	0	0	0	0	0	0	0	0	0	0	0	0	0	0	0	0	0	0	0	0	0	0	0	0	0
RPS_01	2.02	2.25	3.2	6.8	1.24	4374.310547	20836.715	87.1252	0.8919	4.0877	3.2294	0.3659	0	0	0	0.4948	3.6051	0	0.2	0	0	0	0	0	0	0	0	0	0	0	0	0	0	0	0	0	0	0	0	0	0	0	0	0	0	0	0	0	0
RPS_01	2.98	3.5	6.99	9.69	1.38	4364.739258	20834.25	72.3654	0.6377	3.4764	10.8416	0.3054	0	0	0	0.3576	11.6903	0.156	0.1695	0	0	0	0	0	0	0	0	0	0	0	0	0	0	0	0	0	0	0	0	0	0	0	0	0	0	0	0	0	0
RPS_01	3.13	3.5	7.68	9.98	1.25	4382.794189	20822.36	77.1177	0.6847	5.4668	7.1707	0.7947	0	0	0	0.7366	7.7567	0	0.2722	0	0	0	0	0	0	0	0	0	0	0	0	0	0	0	0	0	0	0	0	0	0	0	0	0	0	0	0	0	0
RPS_01	3.17	3.58	7.89	10.56	1.27	4317.317871	20821.345	75.7096	1.5515	5.9269	7.0253	0.7703	0	0	0	0.9664	7.4695	0.1774	0.4031	0	0	0	0	0	0	0	0	0	0	0	0	0	0	0	0	0	0	0	0	0	0	0	0	0	0	0	0	0	0
RPS_01	1.67	2.18	2.2	6.08	1.69	4421.876953	20813.805	93.0475	1.135	3.6981	1.0497	0	0	0	0	0	1.0696	0	0	0	0	0	0	0	0	0	0	0	0	0	0	0	0	0	0	0	0	0	0	0	0	0	0	0	0	0	0	0	0
RPS_01	5.04	5.79	19.97	18.38	1.32	4388.377441	20808.295	66.041	0.8309	8.7188	9.7814	1.1717	0	0	0	1.6497	10.6358	0.1883	0.7416	0	0	0	0	0	0.2407	0	0	0	0	0	0	0	0	0	0	0	0	0	0	0	0	0	0	0	0	0	0	0	0
RPS_01	3.16	3.66	7.85	10.56	1.34	4329.064453	20807.715	79.5009	1.0149	4.5166	6.7201	0.4273	0	0	0	0.6663	6.9573	0	0.1966	0	0	0	0	0	0	0	0	0	0	0	0	0	0	0	0	0	0	0	0	0	0	0	0	0	0	0	0	0	0
RPS_01	3.81	5.54	11.39	13.46	2.12	4344.291504	20796.695	82.2896	1.6081	9.9842	0.9682	0.5381	0.1339	0.3382	0	0.9973	1.4533	0	1.6891	0	0	0	0	0	0	0	0	0	0	0	0	0	0	0	0	0	0	0	0	0	0	0	0	0	0	0	0	0	0
RPS_01	3.37	3.8	8.9	11	1.27	4331.964844	20794.955	73.6526	0.6124	6.4001	8.3337	0.624	0	0	0	0.9211	9.1759	0	0.2802	0	0	0	0	0	0	0	0	0	0	0	0	0	0	0	0	0	0	0	0	0	0	0	0	0	0	0	0	0	0
RPS_01	3.52	3.8	9.76	10.85	1.16	4412.015625	20793.94	73.1823	0.8253	5.0841	9.9017	0.5492	0	0	0	0.3763	10.0812	0	0	0	0	0	0	0	0	0	0	0	0	0	0	0	0	0	0	0	0	0	0	0	0	0	0	0	0	0	0	0	0
RPS_01	4.7	5.8	17.38	16.06	1.52	4377.065918	20782.8475	64.2388	0.9827	16.6478	3.828	0.2464	0.9085	9.0539	0	0.2687	3.8252	0	0	0	0	0	0	0	0	0	0	0	0	0	0	0	0	0	0	0	0	0	0	0	0	0	0	0	0	0	0	0	0
RPS_01	1.57	1.89	1.95	4.92	1.44	4364.304199	20775.1625	92.2506	0.9968	4.4114	1.0792	0.2079	0	0	0	0.1651	0.889	0	0	0	0	0	0	0	0	0	0	0	0	0	0	0	0	0	0	0	0	0	0	0	0	0	0	0	0	0	0	0	0
RPS_01	2.22	2.53	3.87	7.23	1.29	4149.957764	20873.3275	89.2105	1.2205	3.6176	2.9046	0.1536	0	0	0	0	2.8931	0	0	0	0	0	0	0	0	0	0	0	0	0	0	0	0	0	0	0	0	0	0	0	0	0	0	0	0	0	0	0	0
RPS_01	8.14	8.99	52.02	27.49	1.22	4198.756836	20866.73	43.1829	2.5925	35.2404	0	0.4197	7.1098	8.7649	0	0	0	0.484	0	0	0	0	0	1.9345	0.2712	0	0	0	0	0	0	0	0	0	0	0	0	0	0	0	0	0	0	0	0	0	0	0	0
RPS_01	2.95	4.6	6.85	11.58	2.43	4255.169434	20867.31	91.1021	1.6927	3.5947	1.8024	0	0	0	0	0	1.808	0	0	0	0	0	0	0	0	0	0	0	0	0	0	0	0	0	0	0	0	0	0	0	0	0	0	0	0	0	0	0	0
RPS_01	2.32	4.17	4.23	9.4	3.22	4250.818848	20863.7575	89.6429	1.2001	3.3327	2.8612	0	0	0	0	0	2.9631	0	0	0	0	0	0	0	0	0	0	0	0	0	0	0	0	0	0	0	0	0	0	0	0	0	0	0	0	0	0	0	0
RPS_01	6.1	7.76	29.27	21.12	1.61	4287.21875	20861.655	51.1499	1.8128	29.7414	0	0.4582	6.6867	8.4584	0	0	0	0.3146	0.1688	0	0	0	0	1.2092	0	0	0	0	0	0	0	0	0	0	0	0	0	0	0	0	0	0	0	0	0	0	0	0	0
RPS_01	1.88	2.19	2.78	6.08	1.35	4230.081055	20839.18	86.9407	1.6052	7.4046	0	0	0.305	0.5332	0	0	0	0	0	0	0	0	0	2.9941	0.2171	0	0	0	0	0	0	0	0	0	0	0	0	0	0	0	0	0	0	0	0	0	0	0	0
RPS_01	2.97	3.34	6.93	9.69	1.26	4199.916992	20834.975	80.7205	1.1292	5.2234	5.4239	0.6272	0	0	0	0.6219	6.075	0	0.179	0	0	0	0	0	0	0	0	0	0	0	0	0	0	0	0	0	0	0	0	0	0	0	0	0	0	0	0	0	0
RPS_01	4.07	5.78	12.98	16.78	2.02	4159.456543	20823.375	67.7969	2.0329	17.7874	0.1129	0.4464	0.2355	0.4666	0	0.3089	0.1933	0	10.6193	0	0	0	0	0	0	0	0	0	0	0	0	0	0	0	0	0	0	0	0	0	0	0	0	0	0	0	0	0	0
RPS_01	4.5	5.63	15.93	16.06	1.56	4290.40918	20815.4	72.0459	2.3173	16.7957	0	0.2703	0.5553	0.9269	0	0	0.1816	0	6.6705	0	0	0	0	0.2365	0	0	0	0	0	0	0	0	0	0	0	0	0	0	0	0	0	0	0	0	0	0	0	0	0
RPS_01	3.47	3.66	9.48	10.85	1.11	4237.912109	20802.93	81.9762	1.1649	5.2445	4.8638	0.4595	0	0	0	0.6647	5.4221	0	0.2044	0	0	0	0	0	0	0	0	0	0	0	0	0	0	0	0	0	0	0	0	0	0	0	0	0	0	0	0	0	0
RPS_01	2.86	3.2	6.41	9.4	1.26	4244.00293	20797.13	80.0056	1.1521	7.0476	4.6833	0.8344	0	0	0	1.1123	4.7498	0	0.4149	0	0	0	0	0	0	0	0	0	0	0	0	0	0	0	0	0	0	0	0	0	0	0	0	0	0	0	0	0	0
RPS_01	3.18	3.63	7.96	10.42	1.3	4250.963867	20775.67	78.878	0	4.6474	7.328	0.5376	0	0	0	0.9148	7.4042	0	0.2901	0	0	0	0	0	0	0	0	0	0	0	0	0	0	0	0	0	0	0	0	0	0	0	0	0	0	0	0	0	0
RPS_01	3.07	3.36	7.39	9.69	1.2	4237.912109	20772.915	78.1746	1.4601	14.1849	0	0.1047	2.6094	3.1988	0	0	0	0	0	0	0	0	0	0.2676	0	0	0	0	0	0	0	0	0	0	0	0	0	0	0	0	0	0	0	0	0	0	0	0	0
RPS_01	3.76	3.97	11.12	12.01	1.12	4289.974121	20771.755	70.5154	0.9583	7.7444	8.8014	1.035	0	0	0	1.3989	9.0967	0	0.4499	0	0	0	0	0	0	0	0	0	0	0	0	0	0	0	0	0	0	0	0	0	0	0	0	0	0	0	0	0	0
RPS_01	9.93	13.37	77.46	36.32	1.81	4048.001465	20873.545	45.0929	2.4759	31.4144	0.4992	0.6993	7.5505	9.4433	0	0	0.27	1.4252	0	0	0	0	0	1.1294	0	0	0	0	0	0	0	0	0	0	0	0	0	0	0	0	0	0	0	0	0	0	0	0	0
RPS_01	5.11	6.39	20.54	18.09	1.56	4009.28125	20866.3675	51.3623	1.7964	28.9534	0	0.3073	3.7541	12.2671	0	0	0	0.2092	0	0.2786	0	0	0	1.0715	0	0	0	0	0	0	0	0	0	0	0	0	0	0	0	0	0	0	0	0	0	0	0	0	0
RPS_01	3.43	4.22	9.25	11	1.51	4050.321777	20859.335	75.0718	0.9246	7.1718	6.8642	0.9046	0	0.1146	0	0.8584	7.7621	0	0.3279	0	0	0	0	0	0	0	0	0	0	0	0	0	0	0	0	0	0	0	0	0	0	0	0	0	0	0	0	0	0
RPS_01	1.8	2.73	2.55	7.38	2.29	4065.621338	20855.855	91.9952	1.0768	4.387	1.3308	0.1287	0	0	0	0	1.0815	0	0	0	0	0	0	0	0	0	0	0	0	0	0	0	0	0	0	0	0	0	0	0	0	0	0	0	0	0	0	0	0
RPS_01	4.57	6.21	16.41	15.19	1.85	4078.020508	20850.1275	65.8863	2.2189	20.3688	0	0.423	0.6903	1.6098	0	0	0	0	8.5292	0	0	0	0	0.2739	0	0	0	0	0	0	0	0	0	0	0	0	0	0	0	0	0	0	0	0	0	0	0	0	0
RPS_01	2.34	2.81	4.31	8.25	1.44	4039.735352	20848.75	86.2851	0.9843	5.847	3.0146	0.3442	0	0	0	0.3962	3.1287	0	0	0	0	0	0	0	0	0	0	0	0	0	0	0	0	0	0	0	0	0	0	0	0	0	0	0	0	0	0	0	0
RPS_01	4.13	4.79	13.38	13.17	1.35	4012.036621	20837.875	66.0709	0	5.601	12.4819	0.8702	0	0	0	0.8432	13.5662	0.2155	0.3512	0	0	0	0	0	0	0	0	0	0	0	0	0	0	0	0	0	0	0	0	0	0	0	0	0	0	0	0	0	0
RPS_01	1.56	2.21	1.9	5.5	2.02	4076.135254	20838.02	91.7709	0.8833	4.6408	0.9431	0.3299	0	0	0	0.5547	0.6489	0	0.2283	0	0	0	0	0	0	0	0	0	0	0	0	0	0	0	0	0	0	0	0	0	0	0	0	0	0	0	0	0	0
RPS_01	4.7	5.64	17.35	16.06	1.44	4140.378906	20830.045	64.208	0.6254	4.5019	14.2424	0.9933	0	0	0	0.4879	14.9411	0	0	0	0	0	0	0	0	0	0	0	0	0	0	0	0	0	0	0	0	0	0	0	0	0	0	0	0	0	0	0	0
RPS_01	3.77	4.28	11.14	11.72	1.29	4129.647461	20830.48	66.7466	0.6458	5.1638	11.9658	1.0804	0	0	0	1.1463	12.9012	0	0.3501	0	0	0	0	0	0	0	0	0	0	0	0	0	0	0	0	0	0	0	0	0	0	0	0	0	0	0	0	0	0
RPS_01	4.52	5.31	16.04	15.63	1.38	4003.480469	20827	65.7577	0.7909	9.3282	9.7056	0.5463	1.6285	1.7589	0	0.3568	9.5175	0	0	0	0	0	0.2	0.4095	0	0	0	0	0	0	0	0	0	0	0	0	0	0	0	0	0	0	0	0	0	0	0	0	0
RPS_01	4.45	5.37	15.55	14.32	1.46	4123.266602	20803.655	47.424	1.6923	31.3477	0	0.2247	8.831	9.4979	0	0	0	0.18	0	0	0	0	0	0.8025	0	0	0	0	0	0	0	0	0	0	0	0	0	0	0	0	0	0	0	0	0	0	0	0	0
RPS_01	3.37	3.76	8.92	11.29	1.24	4015.952148	20785.095	71.5718	0.7897	8.5718	7.6075	1.4179	0	0	0	1.5839	7.9555	0	0.5019	0	0	0	0	0	0	0	0	0	0	0	0	0	0	0	0	0	0	0	0	0	0	0	0	0	0	0	0	0	0
RPS_01	2.69	3.12	5.67	8.97	1.34	4003.480469	20780.02	84.6663	1.219	4.8304	3.6337	0.4296	0	0	0	0.951	3.8996	0	0.3704	0	0	0	0	0	0	0	0	0	0	0	0	0	0	0	0	0	0	0	0	0	0	0	0	0	0	0	0	0	0
RPS_01	4.08	4.6	13.06	13.02	1.27	4108.039551	20778.715	65.3536	0.5425	4.4602	13.4362	0.8599	0	0	0	0.9991	13.9782	0	0.3702	0	0	0	0	0	0	0	0	0	0	0	0	0	0	0	0	0	0	0	0	0	0	0	0	0	0	0	0	0	0
RPS_01	4.69	5.65	17.25	21.41	1.45	4043.505859	20772.8425	78.2043	0.9165	7.6809	5.6276	0.4246	0	0	0	1.0087	5.4932	0.1716	0.4727	0	0	0	0	0	0	0	0	0	0	0	0	0	0	0	0	0	0	0	0	0	0	0	0	0	0	0	0	0	0
RPS_01	3.36	4.46	8.88	12.3	1.76	3882.454102	20882.1	86.2982	1.5393	4.572	3.2576	0.2083	0	0	0	0.5702	3.3147	0	0.2396	0	0	0	0	0	0	0	0	0	0	0	0	0	0	0	0	0	0	0	0	0	0	0	0	0	0	0	0	0	0
RPS_01	3.79	4.58	11.26	12.44	1.46	3892.605469	20880.07	74.6367	0.9572	4.3223	9.1019	0.6337	0	0	0	0.6809	9.4749	0	0.1924	0	0	0	0	0	0	0	0	0	0	0	0	0	0	0	0	0	0	0	0	0	0	0	0	0	0	0	0	0	0
RPS_01	7.19	8.57	40.65	29.37	1.42	3954.818848	20870.4275	56.3319	0.6102	8.9959	14.0601	1.1312	0	0	0	1.6514	16.288	0.1632	0.7683	0	0	0	0	0	0	0	0	0	0	0	0	0	0	0	0	0	0	0	0	0	0	0	0	0	0	0	0	0	0
RPS_01	3.84	4.67	11.56	14.9	1.48	3989.478516	20872.095	72.5715	0.884	5.2314	10.0953	0.6239	0	0	0	0.1723	10.4216	0	0	0	0	0	0	0	0	0	0	0	0	0	0	0	0	0	0	0	0	0	0	0	0	0	0	0	0	0	0	0	0
RPS_01	2.05	2.76	3.29	7.23	1.83	3992.233887	20872.965	89.1053	1.557	6.4989	0.5431	0.1097	0	0	0	1.1233	0.1973	0	0.8655	0	0	0	0	0	0	0	0	0	0	0	0	0	0	0	0	0	0	0	0	0	0	0	0	0	0	0	0	0	0
RPS_01	3.38	5.36	8.98	16.35	2.51	3950.033203	20868.8325	84.6531	0.7096	5.6988	3.7295	0.6577	0	0.1341	0	0	4.4172	0	0	0	0	0	0	0	0	0	0	0	0	0	0	0	0	0	0	0	0	0	0	0	0	0	0	0	0	0	0	0	0
RPS_01	4.81	7.69	18.17	42.39	2.56	3946.987793	20864.9175	86.2701	0.9566	5.7606	3.1824	0.3851	0	0	0	0	3.4451	0	0	0	0	0	0	0	0	0	0	0	0	0	0	0	0	0	0	0	0	0	0	0	0	0	0	0	0	0	0	0	0
RPS_01	0.95	1.17	0.71	2.89	1.5	3946.842773	20864.6275	91.2697	0.5983	3.4455	2.0846	0.3233	0	0	0	0	2.2787	0	0	0	0	0	0	0	0	0	0	0	0	0	0	0	0	0	0	0	0	0	0	0	0	0	0	0	0	0	0	0	0
RPS_01	4.36	5.26	14.93	14.32	1.46	3996.584473	20849.475	72.5668	0.8531	5.4914	9.597	0.6136	0	0	0	0.8105	9.8512	0	0.2165	0	0	0	0	0	0	0	0	0	0	0	0	0	0	0	0	0	0	0	0	0	0	0	0	0	0	0	0	0	0
RPS_01	5.1	5.55	20.45	18.09	1.18	3975.556641	20847.9525	64.4217	0	5.777	13.4901	0.8529	0	0	0	1.1083	14.044	0	0.3059	0	0	0	0	0	0	0	0	0	0	0	0	0	0	0	0	0	0	0	0	0	0	0	0	0	0	0	0	0	0
RPS_01	3.14	3.44	7.77	9.98	1.2	3966.275391	20830.48	77.7737	0.9708	7.0183	5.417	1.0812	0	0	0	1.1592	6.1132	0	0.4665	0	0	0	0	0	0	0	0	0	0	0	0	0	0	0	0	0	0	0	0	0	0	0	0	0	0	0	0	0	0
RPS_01	6.48	8.88	33.01	22.43	1.88	3887.602295	20825.1875	51.163	1.2407	21.2707	5.7613	0.2988	4.7338	5.6876	0	0.9527	5.6594	0.4098	0.7114	0.2139	0	0	0.2	1.4375	0.2594	0	0	0	0	0	0	0	0	0	0	0	0	0	0	0	0	0	0	0	0	0	0	0	0
RPS_01	3.02	4.47	7.16	11.29	2.19	3926.39502	20828.16	86.8904	1.9597	8.8279	0	0	0.6917	0.8704	0	0	0	0	0.3624	0	0	0	0	0.3975	0	0	0	0	0	0	0	0	0	0	0	0	0	0	0	0	0	0	0	0	0	0	0	0	0
RPS_01	2.67	3.04	5.59	8.54	1.3	3936.691406	20825.115	83.7891	1.0722	3.7856	4.9515	0.3588	0	0	0	0.6441	5.2179	0	0.1808	0	0	0	0	0	0	0	0	0	0	0	0	0	0	0	0	0	0	0	0	0	0	0	0	0	0	0	0	0	0
RPS_01	2	2.56	3.14	6.66	1.64	3962.649902	20823.955	87.2022	1.1252	4.8929	3.1685	0.2833	0	0	0	0.2736	3.0544	0	0	0	0	0	0	0	0	0	0	0	0	0	0	0	0	0	0	0	0	0	0	0	0	0	0	0	0	0	0	0	0
RPS_01	3.99	4.85	12.48	13.31	1.48	3898.696289	20799.74	60.3084	1.8665	23.7278	0.1041	2.0225	3.8792	5.854	0	0	0	0.2624	0	0	0	0	0	1.975	0	0	0	0	0	0	0	0	0	0	0	0	0	0	0	0	0	0	0	0	0	0	0	0	0
RPS_01	2.66	3.07	5.57	8.54	1.33	3878.248535	20796.695	82.8021	1.038	4.547	5.1512	0.4425	0.1126	0	0	0.3806	5.5259	0	0	0	0	0	0	0	0	0	0	0	0	0	0	0	0	0	0	0	0	0	0	0	0	0	0	0	0	0	0	0	0
RPS_01	2.57	2.98	5.17	8.25	1.35	3978.094482	20795.535	81.9727	0.9554	5.0062	4.8292	0.5548	0	0	0	1.2448	5.0037	0	0.4332	0	0	0	0	0	0	0	0	0	0	0	0	0	0	0	0	0	0	0	0	0	0	0	0	0	0	0	0	0	0
RPS_01	3.37	4.36	8.94	12.15	1.67	3945.247559	20793.505	67.5136	1.5253	18.1671	0	0	0.609	11.9049	0	0	0	0	0	0	0	0	0	0.28	0	0	0	0	0	0	0	0	0	0	0	0	0	0	0	0	0	0	0	0	0	0	0	0	0
RPS_01	3.33	3.76	8.73	10.56	1.27	3939.591797	20789.3	71.0739	0.9296	8.0196	8.028	1.1752	0	0	0	1.2868	8.9916	0	0.4953	0	0	0	0	0	0	0	0	0	0	0	0	0	0	0	0	0	0	0	0	0	0	0	0	0	0	0	0	0	0
RPS_01	3.98	5.34	12.46	13.89	1.8	3988.463379	20787.27	75.5351	1.032	8.1395	5.0447	0.6924	0.8285	1.7688	0	0.4453	5.2786	0	1.0272	0	0	0	0	0.208	0	0	0	0	0	0	0	0	0	0	0	0	0	0	0	0	0	0	0	0	0	0	0	0	0
RPS_01	4.01	4.77	12.64	13.75	1.41	3951.483398	20786.545	72.74	0.9999	7.6486	7.3801	1.0817	0	0	0	1.2675	8.2363	0.1623	0.4836	0	0	0	0	0	0	0	0	0	0	0	0	0	0	0	0	0	0	0	0	0	0	0	0	0	0	0	0	0	0
RPS_01	2.33	2.84	4.27	8.83	1.49	3930.745605	20786.4	84.6613	0.8917	4.4953	4.4006	0.3811	0	0	0	0.2015	4.9686	0	0	0	0	0	0	0	0	0	0	0	0	0	0	0	0	0	0	0	0	0	0	0	0	0	0	0	0	0	0	0	0
RPS_01	3.04	3.39	7.24	9.98	1.24	3898.986328	20783.935	74.7458	0.9871	6.7103	7.5082	0.7945	0	0	0	1.0645	7.8865	0	0.3031	0	0	0	0	0	0	0	0	0	0	0	0	0	0	0	0	0	0	0	0	0	0	0	0	0	0	0	0	0	0
RPS_01	3.51	4	9.65	11.72	1.3	3892.460449	20772.77	70.9707	1.0584	5.5489	9.7526	0.9054	0	0	0	1.1466	10.2318	0	0.3856	0	0	0	0	0	0	0	0	0	0	0	0	0	0	0	0	0	0	0	0	0	0	0	0	0	0	0	0	0	0
RPS_01	2.53	2.93	5.02	8.1	1.34	3778.39502	20872.82	82.5433	1.0395	6.3672	3.8424	0.8068	0	0	0	0.8945	4.1461	0	0.3602	0	0	0	0	0	0	0	0	0	0	0	0	0	0	0	0	0	0	0	0	0	0	0	0	0	0	0	0	0	0
RPS_01	2.88	3.24	6.51	9.69	1.26	3807.688965	20870.935	81.1546	1.04	4.3857	6.0782	0.4106	0	0	0	0.3734	6.5575	0	0	0	0	0	0	0	0	0	0	0	0	0	0	0	0	0	0	0	0	0	0	0	0	0	0	0	0	0	0	0	0
RPS_01	1.93	2.98	2.93	7.81	2.38	3828.281738	20862.09	91.1277	0.9772	3.056	2.311	0	0	0	0	0	2.5282	0	0	0	0	0	0	0	0	0	0	0	0	0	0	0	0	0	0	0	0	0	0	0	0	0	0	0	0	0	0	0	0
RPS_01	1.83	2.79	2.62	6.95	2.34	3826.396484	20861.655	88.9334	0.8237	2.706	3.551	0.1205	0	0	0	0	3.8655	0	0	0	0	0	0	0	0	0	0	0	0	0	0	0	0	0	0	0	0	0	0	0	0	0	0	0	0	0	0	0	0
RPS_01	3.95	4.46	12.25	13.75	1.27	3831.472168	20856.87	79.6417	1.1385	6.2607	5.2597	0.7857	0	0	0	1.1266	5.4559	0	0.3312	0	0	0	0	0	0	0	0	0	0	0	0	0	0	0	0	0	0	0	0	0	0	0	0	0	0	0	0	0	0
RPS_01	4.37	6	15.03	14.76	1.88	3823.206055	20842.1525	67.8089	0.9054	7.1447	11.044	0.9426	0	0	0	0.6712	11.483	0	0	0	0	0	0	0	0	0	0	0	0	0	0	0	0	0	0	0	0	0	0	0	0	0	0	0	0	0	0	0	0
RPS_01	4.37	6.09	14.99	14.9	1.94	3849.019531	20835.41	68.0444	1.576	16.0131	0	0	0	0.1306	0	7.6792	0	0	6.5567	0	0	0	0	0	0	0	0	0	0	0	0	0	0	0	0	0	0	0	0	0	0	0	0	0	0	0	0	0	0
RPS_01	1.5	1.76	1.76	5.35	1.38	3718.791992	20830.5525	94.8551	1.0659	3.2391	0.4294	0.132	0	0	0	0	0.2784	0	0	0	0	0	0	0	0	0	0	0	0	0	0	0	0	0	0	0	0	0	0	0	0	0	0	0	0	0	0	0	0
RPS_01	2.76	3.26	5.97	8.68	1.4	3822.045898	20828.45	80.5722	1.5515	12.6289	0	0.2888	1.5787	2.8013	0	0	0	0	0	0	0	0	0	0.5786	0	0	0	0	0	0	0	0	0	0	0	0	0	0	0	0	0	0	0	0	0	0	0	0	0
RPS_01	1.65	1.93	2.14	5.35	1.37	3830.312012	20826.565	93.5048	1.1894	3.4291	0.8379	0	0	0	0	0.1516	0.8873	0	0	0	0	0	0	0	0	0	0	0	0	0	0	0	0	0	0	0	0	0	0	0	0	0	0	0	0	0	0	0	0
RPS_01	3.52	3.72	9.73	11	1.12	3837.417969	20821.78	76.6417	0.9822	5.0147	7.3894	0.7326	0	0	0	0.9934	7.9883	0	0.2576	0	0	0	0	0	0	0	0	0	0	0	0	0	0	0	0	0	0	0	0	0	0	0	0	0	0	0	0	0	0
RPS_01	4.59	5.57	16.54	15.77	1.47	3718.211914	20816.415	63.4722	0.6967	5.6255	13.7932	1.0483	0	0	0	0.6508	14.7132	0	0	0	0	0	0	0	0	0	0	0	0	0	0	0	0	0	0	0	0	0	0	0	0	0	0	0	0	0	0	0	0
RPS_01	3.95	4.79	12.25	14.18	1.47	3753.161621	20803.8	52.0995	1.5352	28.6802	0	0	2.3233	14.9597	0	0	0	0	0	0	0	0	0	0.4021	0	0	0	0	0	0	0	0	0	0	0	0	0	0	0	0	0	0	0	0	0	0	0	0	0
RPS_01	6.58	8.18	34	24.74	1.54	3806.673828	20800.9725	46.303	1.7858	31.5204	0	0.6314	6.4989	9.8159	0	0	0	0.8691	0.2769	0.2647	0	0	0	1.7754	0.2585	0	0	0	0	0	0	0	0	0	0	0	0	0	0	0	0	0	0	0	0	0	0	0	0
RPS_01	2.58	2.78	5.23	7.81	1.16	3847.859375	20791.04	82.9971	0.8704	3.9259	5.7734	0.303	0	0	0	0.2124	5.9178	0	0	0	0	0	0	0	0	0	0	0	0	0	0	0	0	0	0	0	0	0	0	0	0	0	0	0	0	0	0	0	0
RPS_01	5.55	6.23	24.22	18.81	1.26	3834.807617	20789.3725	51.5093	1.8784	24.8099	1.6706	0.4509	6.8897	8.0043	0	0.2837	1.6582	1.3072	0.2692	0	0	0	0	0.9994	0.2693	0	0	0	0	0	0	0	0	0	0	0	0	0	0	0	0	0	0	0	0	0	0	0	0
RPS_01	2.68	3.41	5.63	9.69	1.62	3786.516113	20786.98	83.1836	1.0282	6.2343	4.1669	0.3609	0	0	0	0.7483	3.9425	0	0.3354	0	0	0	0	0	0	0	0	0	0	0	0	0	0	0	0	0	0	0	0	0	0	0	0	0	0	0	0	0	0
RPS_01	3.25	4.46	8.29	11.72	1.88	3810.879395	20781.76	79.7283	1.5585	12.4848	0	0.1585	2.2469	3.0918	0	0	0	0.2253	0	0	0	0	0	0.5058	0	0	0	0	0	0	0	0	0	0	0	0	0	0	0	0	0	0	0	0	0	0	0	0	0
RPS_01	4.38	6.02	15.05	16.35	1.89	3710.09082	20774.51	65.8593	1.0594	18.7276	0.6953	0.7092	0.6184	1.3226	0	0.2053	1.2303	0.1937	9.0704	0	0	0	0	0.3085	0	0	0	0	0	0	0	0	0	0	0	0	0	0	0	0	0	0	0	0	0	0	0	0	0
RPS_01	3.02	3.56	7.18	10.42	1.39	3807.688965	20993.62	75.005	0.6839	5.382	8.6725	0.7974	0	0	0	0.6094	8.8498	0	0	0	0	0	0	0	0	0	0	0	0	0	0	0	0	0	0	0	0	0	0	0	0	0	0	0	0	0	0	0	0
RPS_01	6.53	7.76	33.54	26.91	1.41	3740.907471	20991.0825	44.2684	2.0018	34.5549	0	0	10.0024	8.7865	0	0	0	0	0	0	0	0	0	0.386	0	0	0	0	0	0	0	0	0	0	0	0	0	0	0	0	0	0	0	0	0	0	0	0	0
RPS_01	7.98	9.33	50.03	28.5	1.37	3824.366211	20976.7275	49.2269	0	12.9608	15.2067	1.4481	1.2006	1.2985	0	1.1877	16.1244	0.4401	0.4467	0	0	0	0	0.2077	0.2518	0	0	0	0	0	0	0	0	0	0	0	0	0	0	0	0	0	0	0	0	0	0	0	0
RPS_01	4.16	5.52	13.61	14.18	1.76	3757.657227	20967.375	68.7624	1.7181	19.1701	0	0.3244	3.2656	5.5917	0	0	0	0.3487	0	0	0	0	0	0.8189	0	0	0	0	0	0	0	0	0	0	0	0	0	0	0	0	0	0	0	0	0	0	0	0	0
RPS_01	4.03	5.27	12.77	12.88	1.71	3834.952637	20965.925	75.7863	2.1395	14.8269	0	0.3405	0.2906	0.8538	0	0	0	0	5.7623	0	0	0	0	0	0	0	0	0	0	0	0	0	0	0	0	0	0	0	0	0	0	0	0	0	0	0	0	0	0
RPS_01	2.51	2.84	4.96	8.1	1.28	3788.256348	20963.315	85.8267	1.2698	6.1692	2.9701	0.3569	0	0	0	0.3432	3.064	0	0	0	0	0	0	0	0	0	0	0	0	0	0	0	0	0	0	0	0	0	0	0	0	0	0	0	0	0	0	0	0
RPS_01	2.92	3.24	6.7	9.26	1.23	3787.60376	20936.925	77.7693	0.9783	6.5737	6.1178	0.9857	0	0	0	0.9005	6.4836	0	0.1912	0	0	0	0	0	0	0	0	0	0	0	0	0	0	0	0	0	0	0	0	0	0	0	0	0	0	0	0	0	0
RPS_01	2.73	3.09	5.86	8.97	1.28	3776.654785	20922.86	81.3778	0.8947	6.872	4.2362	0.797	0	0	0	0.7365	4.7609	0	0.3249	0	0	0	0	0	0	0	0	0	0	0	0	0	0	0	0	0	0	0	0	0	0	0	0	0	0	0	0	0	0
RPS_01	4.29	5.45	14.49	15.34	1.61	3834.807617	20915.175	57.0482	1.6585	25.5258	0	0	0.4164	15.3512	0	0	0	0	0	0	0	0	0	0	0	0	0	0	0	0	0	0	0	0	0	0	0	0	0	0	0	0	0	0	0	0	0	0	0
RPS_01	2.2	2.75	3.79	7.81	1.57	3816.970215	20910.97	90.6801	1.1833	3.7489	1.932	0.28	0	0	0	0.1699	2.0059	0	0	0	0	0	0	0	0	0	0	0	0	0	0	0	0	0	0	0	0	0	0	0	0	0	0	0	0	0	0	0	0
RPS_01	2.73	3.07	5.86	9.26	1.26	3806.23877	20895.165	81.6357	0.9377	4.2973	6.0813	0.4859	0	0	0	0.4762	6.0858	0	0	0	0	0	0	0	0	0	0	0	0	0	0	0	0	0	0	0	0	0	0	0	0	0	0	0	0	0	0	0	0
RPS_01	3.09	3.52	7.49	10.56	1.3	3835.097656	20889.51	78.8688	0.9095	5.2802	6.4155	0.5969	0	0.1275	0	0.8061	6.7646	0	0.231	0	0	0	0	0	0	0	0	0	0	0	0	0	0	0	0	0	0	0	0	0	0	0	0	0	0	0	0	0	0
RPS_01	3.49	3.91	9.57	10.56	1.25	3733.293945	20887.045	71.1892	0.9816	6.6021	9.3142	0.8785	0	0	0	1.0111	9.7132	0	0.3102	0	0	0	0	0	0	0	0	0	0	0	0	0	0	0	0	0	0	0	0	0	0	0	0	0	0	0	0	0	0
RPS_01	1.85	2.56	2.7	6.22	1.91	3786.226074	21097.31	86.1282	0.7317	5.3065	3.1827	0.7296	0	0	0	0.9319	2.7121	0	0.2774	0	0	0	0	0	0	0	0	0	0	0	0	0	0	0	0	0	0	0	0	0	0	0	0	0	0	0	0	0	0
RPS_01	8.8	9.31	60.88	29.95	1.12	3799.132813	21093.105	43.4364	1.7673	29.9375	3.2004	0.7618	5.0114	9.0695	0	0.6299	3.2732	1.0488	0.4815	0	0	0	0	1.1071	0.2752	0	0	0	0	0	0	0	0	0	0	0	0	0	0	0	0	0	0	0	0	0	0	0	0
RPS_01	4.62	5.72	16.77	18.81	1.53	3777.814941	21090.1325	70.772	1.0172	10.282	6.6663	1.2125	0.3535	0.4958	0	1.2131	7.3449	0.2505	0.3923	0	0	0	0	0	0	0	0	0	0	0	0	0	0	0	0	0	0	0	0	0	0	0	0	0	0	0	0	0	0
RPS_01	3.42	3.97	9.17	17.07	1.35	3824.221191	21089.045	91.9	1.6493	3.4195	1.5067	0	0	0	0	0	1.5246	0	0	0	0	0	0	0	0	0	0	0	0	0	0	0	0	0	0	0	0	0	0	0	0	0	0	0	0	0	0	0	0
RPS_01	5.97	8.22	28.03	25.9	1.89	3824.366211	21076.6475	71.1044	0.5312	6.1803	10.0395	0.6266	0	0	0	0.5418	10.2603	0.1785	0.2709	0	0	0	0	0	0.2665	0	0	0	0	0	0	0	0	0	0	0	0	0	0	0	0	0	0	0	0	0	0	0	0
RPS_01	1.62	2.5	2.05	5.79	2.39	3721.402344	21070.485	93.1642	0.8652	4.1282	0.9789	0.1659	0	0	0	0	0.6976	0	0	0	0	0	0	0	0	0	0	0	0	0	0	0	0	0	0	0	0	0	0	0	0	0	0	0	0	0	0	0	0
RPS_01	4.7	5.42	17.31	15.63	1.33	3721.257324	21057.58	65.0999	1.0142	6.4374	12.1095	1.1329	0	0	0	1.0359	12.8802	0	0.2898	0	0	0	0	0	0	0	0	0	0	0	0	0	0	0	0	0	0	0	0	0	0	0	0	0	0	0	0	0	0
RPS_01	4	5.38	12.54	15.34	1.82	3794.637207	21048.735	76.6247	0.713	6.5995	7.0631	0.7782	0	0	0	0.7268	7.1353	0	0.3594	0	0	0	0	0	0	0	0	0	0	0	0	0	0	0	0	0	0	0	0	0	0	0	0	0	0	0	0	0	0
RPS_01	4.47	4.81	15.7	14.18	1.16	3823.641113	21043.37	65.9898	0	5.0011	12.9541	1.0755	0	0	0	1.0655	13.6101	0	0.3039	0	0	0	0	0	0	0	0	0	0	0	0	0	0	0	0	0	0	0	0	0	0	0	0	0	0	0	0	0	0
RPS_01	4.79	5.27	18	16.35	1.21	3778.39502	21039.165	59.9814	0	8.6737	12.6187	1.6461	0	0.1134	0	1.3956	14.3339	0.2098	0.4903	0	0	0	0	0.2038	0.3333	0	0	0	0	0	0	0	0	0	0	0	0	0	0	0	0	0	0	0	0	0	0	0	0
RPS_01	3.39	4.03	9.04	11.72	1.41	3832.052246	21038.295	78.8513	1.1262	6.7855	5.6647	0.8372	0	0	0	0.7812	5.6854	0	0.2684	0	0	0	0	0	0	0	0	0	0	0	0	0	0	0	0	0	0	0	0	0	0	0	0	0	0	0	0	0	0
RPS_01	1.5	1.83	1.76	4.92	1.5	3742.140137	21013.5725	93.328	0.9325	3.9485	0.967	0	0	0	0	0.1332	0.6908	0	0	0	0	0	0	0	0	0	0	0	0	0	0	0	0	0	0	0	0	0	0	0	0	0	0	0	0	0	0	0	0
RPS_01	4.52	5	16.04	14.61	1.22	3778.975098	21010.6	62.8854	0	4.7886	15.3249	0.7592	0	0	0	0.3274	15.9144	0	0	0	0	0	0	0	0	0	0	0	0	0	0	0	0	0	0	0	0	0	0	0	0	0	0	0	0	0	0	0	0
RPS_01	3.02	3.31	7.16	10.56	1.2	3808.124023	21002.045	76.1039	0.8479	4.9052	8.3059	0.7328	0	0	0	0.6139	8.4904	0	0	0	0	0	0	0	0	0	0	0	0	0	0	0	0	0	0	0	0	0	0	0	0	0	0	0	0	0	0	0	0
RPS_01	2.02	2.34	3.2	6.51	1.34	3788.546387	21224.345	86.1014	1.0498	4.7109	3.4744	0.4558	0	0	0	0.3376	3.8701	0	0	0	0	0	0	0	0	0	0	0	0	0	0	0	0	0	0	0	0	0	0	0	0	0	0	0	0	0	0	0	0
RPS_01	4.15	4.74	13.5	13.31	1.31	3720.242188	21211.73	67.952	0.7849	8.1317	9.7697	1.2784	0	0	0	1.4075	10.3128	0	0.3629	0	0	0	0	0	0	0	0	0	0	0	0	0	0	0	0	0	0	0	0	0	0	0	0	0	0	0	0	0	0
RPS_01	3.73	4.71	10.95	12.59	1.59	3781.730469	21206.51	73.2675	1.0523	6.4506	8.3182	0.8236	0	0	0	0.7262	9.1443	0	0.2173	0	0	0	0	0	0	0	0	0	0	0	0	0	0	0	0	0	0	0	0	0	0	0	0	0	0	0	0	0	0
RPS_01	3.39	4.28	9	11.43	1.59	3800.583008	21205.35	79.3098	1.0845	5.5826	6.1285	0.5249	0	0	0	0.6925	6.4066	0	0.2705	0	0	0	0	0	0	0	0	0	0	0	0	0	0	0	0	0	0	0	0	0	0	0	0	0	0	0	0	0	0
RPS_01	2.21	3.34	3.85	12.44	2.28	3840.463379	21203.9	89.9447	1.1534	6.2252	0.5148	0.6149	0	0	0	1.0033	0.3084	0	0.2353	0	0	0	0	0	0	0	0	0	0	0	0	0	0	0	0	0	0	0	0	0	0	0	0	0	0	0	0	0	0
RPS_01	2.96	3.44	6.87	9.4	1.35	3722.127441	21197.085	78.0079	0.8894	5.652	6.8416	0.7917	0	0	0	0.6793	6.9522	0	0.1859	0	0	0	0	0	0	0	0	0	0	0	0	0	0	0	0	0	0	0	0	0	0	0	0	0	0	0	0	0	0
RPS_01	6.12	7.8	29.39	30.1	1.63	3764.763184	21191.2125	60.1934	1.8465	24.4771	0	1.5774	2.8037	7.7208	0	0	0	0.4967	0.163	0	0	0	0	0.7214	0	0	0	0	0	0	0	0	0	0	0	0	0	0	0	0	0	0	0	0	0	0	0	0	0
RPS_01	1.49	2.21	1.74	6.66	2.2	3815.52002	21189.7625	93.5014	0.8701	2.662	1.3671	0	0	0	0	0	1.5994	0	0	0	0	0	0	0	0	0	0	0	0	0	0	0	0	0	0	0	0	0	0	0	0	0	0	0	0	0	0	0	0
RPS_01	3.1	3.44	7.54	10.85	1.23	3802.758301	21188.82	75.477	1.0191	6.2587	7.3815	0.8335	0	0	0	0.7524	8.0106	0	0.2673	0	0	0	0	0	0	0	0	0	0	0	0	0	0	0	0	0	0	0	0	0	0	0	0	0	0	0	0	0	0
RPS_01	4.9	6.14	18.84	16.06	1.57	3847.859375	21179.6125	76.3058	0.9459	6.2718	7.0744	0.9413	0	0	0	0.8882	7.3274	0	0.2452	0	0	0	0	0	0	0	0	0	0	0	0	0	0	0	0	0	0	0	0	0	0	0	0	0	0	0	0	0	0
RPS_01	5.46	6.02	23.38	18.23	1.22	3775.929688	21173.0875	60.8278	0.5123	5.8645	15.2927	1.1329	0	0	0	0.5283	15.8415	0	0	0	0	0	0	0	0	0	0	0	0	0	0	0	0	0	0	0	0	0	0	0	0	0	0	0	0	0	0	0	0
RPS_01	4.72	6.81	17.48	22.28	2.08	3819.145508	21173.015	62.9146	1.5323	17.6069	3.2684	0.7835	3.0066	4.8997	0	0.779	3.3053	0.3475	0.6805	0	0	0	0	0.8756	0	0	0	0	0	0	0	0	0	0	0	0	0	0	0	0	0	0	0	0	0	0	0	0	0
RPS_01	6.85	7.55	36.8	25.61	1.22	3726.913086	21170.4775	49.8814	2.2409	31.2418	0	0.1566	6.5796	9.029	0	0	0	0	0	0	0	0	0	0.8707	0	0	0	0	0	0	0	0	0	0	0	0	0	0	0	0	0	0	0	0	0	0	0	0	0
RPS_01	3.51	4.34	9.67	11.58	1.53	3760.267578	21153.15	77.5966	0.8463	6.8934	6.1209	0.5819	0	0	0	0.9448	6.4032	0.1604	0.4525	0	0	0	0	0	0	0	0	0	0	0	0	0	0	0	0	0	0	0	0	0	0	0	0	0	0	0	0	0	0
RPS_01	3.94	4.94	12.16	13.75	1.57	3811.169434	21140.1	66.6199	1.6543	19.0803	0	0	1.1361	11.186	0	0	0	0	0	0	0	0	0	0.3233	0	0	0	0	0	0	0	0	0	0	0	0	0	0	0	0	0	0	0	0	0	0	0	0	0
RPS_01	4.93	6.22	19.07	26.91	1.59	3844.523926	21127.8475	75.6898	1.1024	8.024	5.8634	0.7321	0	0	0	1.2901	6.2849	0.2399	0.556	0	0	0	0	0.2173	0	0	0	0	0	0	0	0	0	0	0	0	0	0	0	0	0	0	0	0	0	0	0	0	0
RPS_01	1.98	2.43	3.08	6.51	1.5	3765.053223	21120.235	85.5711	0.8331	4.7685	3.8394	0.5257	0	0	0	0.3153	4.1469	0	0	0	0	0	0	0	0	0	0	0	0	0	0	0	0	0	0	0	0	0	0	0	0	0	0	0	0	0	0	0	0
RPS_01	6.79	8.56	36.26	24.74	1.59	3809.13916	21326.5125	41.6162	2.6499	33.9534	0.1295	0.3956	7.3858	11.4848	0	0	0	0.2948	0	0.8842	0	0	0	1.2059	0	0	0	0	0	0	0	0	0	0	0	0	0	0	0	0	0	0	0	0	0	0	0	0	0
RPS_01	4.75	6.95	17.71	25.32	2.14	3817.840332	21315.7825	57.2872	1.9147	26.1953	0	0.5585	5.2811	7.3468	0	0	0	0.4516	0	0	0	0	0	0.7524	0.2123	0	0	0	0	0	0	0	0	0	0	0	0	0	0	0	0	0	0	0	0	0	0	0	0
RPS_01	3.46	3.81	9.4	11.29	1.21	3747.070801	21303.965	67.4719	1.834	19.8785	0	0.1492	4.3649	5.2896	0	0	0	0.1794	0	0	0	0	0	0.8324	0	0	0	0	0	0	0	0	0	0	0	0	0	0	0	0	0	0	0	0	0	0	0	0	0
RPS_01	4.27	5.67	14.3	18.95	1.77	3717.051758	21300.05	68.4698	1.7673	18.0966	0.1094	1.1533	1.0959	2.9387	0	0	0.4864	0	5.6206	0	0	0	0	0.2619	0	0	0	0	0	0	0	0	0	0	0	0	0	0	0	0	0	0	0	0	0	0	0	0	0
RPS_01	3.79	4.4	11.3	13.02	1.35	3732.568848	21275.545	65.8934	1.9491	21.009	0	0.2329	4.4489	5.8545	0	0	0	0	0	0	0	0	0	0.6122	0	0	0	0	0	0	0	0	0	0	0	0	0	0	0	0	0	0	0	0	0	0	0	0	0
RPS_01	5.84	6.96	26.78	19.53	1.42	3765.77832	21269.6725	54.5458	1.0535	18.8818	6.2182	0.3535	4.4031	5.6278	0	0.692	6.2583	0.3049	0.437	0	0	0	0	0.9381	0.286	0	0	0	0	0	0	0	0	0	0	0	0	0	0	0	0	0	0	0	0	0	0	0	0
RPS_01	4.88	5.88	18.72	15.92	1.45	3817.260254	21264.5975	57.0371	1.9562	25.8501	0	0.3777	5.5708	7.3628	0	0	0	0.3211	0	0.1965	0	0	0	1.3276	0	0	0	0	0	0	0	0	0	0	0	0	0	0	0	0	0	0	0	0	0	0	0	0	0
RPS_01	3.89	4.28	11.89	13.6	1.21	3840.463379	21247.995	71.6101	0.8702	3.6571	11.1988	0.5129	0	0	0	0.3782	11.7727	0	0	0	0	0	0	0	0	0	0	0	0	0	0	0	0	0	0	0	0	0	0	0	0	0	0	0	0	0	0	0	0
RPS_01	2.07	2.26	3.37	6.22	1.2	3788.981445	21232.045	85.1626	1.0366	4.3993	3.9223	0.5553	0	0	0	0.3491	4.5748	0	0	0	0	0	0	0	0	0	0	0	0	0	0	0	0	0	0	0	0	0	0	0	0	0	0	0	0	0	0	0	0
RPS_01	2.26	2.95	4	8.54	1.71	3925.524902	21340.94	87.9717	1.2743	4.8926	2.4883	0.2744	0	0	0	0.4169	2.5052	0	0.1766	0	0	0	0	0	0	0	0	0	0	0	0	0	0	0	0	0	0	0	0	0	0	0	0	0	0	0	0	0	0
RPS_01	2.95	3.41	6.85	9.98	1.33	3864.979248	21332.1675	77.0039	0.6954	5.2424	7.3295	0.7877	0	0	0	0.7633	7.9951	0	0.1826	0	0	0	0	0	0	0	0	0	0	0	0	0	0	0	0	0	0	0	0	0	0	0	0	0	0	0	0	0	0
RPS_01	1.53	1.94	1.84	5.21	1.61	3864.181641	21317.015	90.9119	0.7638	4.3432	1.4974	0.4522	0	0	0	0.3183	1.7132	0	0	0	0	0	0	0	0	0	0	0	0	0	0	0	0	0	0	0	0	0	0	0	0	0	0	0	0	0	0	0	0
RPS_01	2.29	2.85	4.12	8.1	1.55	3990.493652	21308.46	88.1994	1.3523	5.5574	2.1557	0.3306	0	0	0	0.2266	2.1781	0	0	0	0	0	0	0	0	0	0	0	0	0	0	0	0	0	0	0	0	0	0	0	0	0	0	0	0	0	0	0	0
RPS_01	3.67	4.49	10.59	13.02	1.5	3962.214844	21298.165	67.1036	1.8344	20.7211	0	0	4.8774	5.0476	0	0	0	0	0	0	0	0	0	0.416	0	0	0	0	0	0	0	0	0	0	0	0	0	0	0	0	0	0	0	0	0	0	0	0	0
RPS_01	3.05	3.97	7.31	12.01	1.7	3977.006836	21297.9475	84.9649	1.8101	9.3428	0	0.1721	0.1106	0.2995	0	0	0.2103	0	3.0897	0	0	0	0	0	0	0	0	0	0	0	0	0	0	0	0	0	0	0	0	0	0	0	0	0	0	0	0	0	0
RPS_01	2.19	3.41	3.77	7.52	2.42	3911.603027	21295.12	90.1802	1.0371	3.2821	2.6315	0	0	0	0	0	2.8692	0	0	0	0	0	0	0	0	0	0	0	0	0	0	0	0	0	0	0	0	0	0	0	0	0	0	0	0	0	0	0	0
RPS_01	4.32	4.71	14.63	14.47	1.19	3997.019531	21293.235	69.8516	0.6454	5.3289	11.0834	0.6903	0	0	0	0.7863	11.2361	0	0.3781	0	0	0	0	0	0	0	0	0	0	0	0	0	0	0	0	0	0	0	0	0	0	0	0	0	0	0	0	0	0
RPS_01	3.06	3.26	7.35	9.69	1.14	3899.566406	21293.235	70.1785	0.5151	5.1758	10.2394	1.0364	0	0	0	1.2641	11.0942	0	0.4965	0	0	0	0	0	0	0	0	0	0	0	0	0	0	0	0	0	0	0	0	0	0	0	0	0	0	0	0	0	0
RPS_01	1.52	1.76	1.82	4.92	1.34	3912.038086	21292.1475	93.652	0.9566	2.4599	1.4016	0	0	0	0	0	1.5299	0	0	0	0	0	0	0	0	0	0	0	0	0	0	0	0	0	0	0	0	0	0	0	0	0	0	0	0	0	0	0	0
RPS_01	5.12	6.19	20.58	16.78	1.46	3883.759277	21288.8125	61.3118	0.5634	10.6601	10.3229	1.1334	1.2748	2.0182	0	0.4462	12.0063	0	0	0	0	0	0	0.2628	0	0	0	0	0	0	0	0	0	0	0	0	0	0	0	0	0	0	0	0	0	0	0	0	0
RPS_01	3.73	4.35	10.95	12.44	1.36	3897.246094	21279.895	72.8324	0.8283	4.7151	9.8887	0.5106	0.1232	0.1465	0	0.6311	10.3241	0	0	0	0	0	0	0	0	0	0	0	0	0	0	0	0	0	0	0	0	0	0	0	0	0	0	0	0	0	0	0	0
RPS_01	1.77	2.25	2.45	5.79	1.62	3878.683594	21270.035	90.4986	1.0967	4.6251	1.4943	0.372	0	0	0	0.2361	1.6772	0	0	0	0	0	0	0	0	0	0	0	0	0	0	0	0	0	0	0	0	0	0	0	0	0	0	0	0	0	0	0	0
RPS_01	3.56	3.95	9.96	11.43	1.23	3924.219727	21263.945	80.0975	0.6	4.4263	6.7267	0.2987	0	0	0	0.4784	7.3724	0	0	0	0	0	0	0	0	0	0	0	0	0	0	0	0	0	0	0	0	0	0	0	0	0	0	0	0	0	0	0	0
RPS_01	5.16	7.38	20.93	18.66	2.05	3939.881836	21262.5675	70.3652	1.7889	19.6006	0.1019	0.5308	1.9829	4.8978	0	0	0	0.1685	0.1744	0	0	0	0	0.3889	0	0	0	0	0	0	0	0	0	0	0	0	0	0	0	0	0	0	0	0	0	0	0	0	0
RPS_01	3.82	5.62	11.47	13.89	2.16	3950.323242	21253.1425	79.5553	1.2135	5.4534	6.2726	0.5507	0	0	0	0.2619	6.6926	0	0	0	0	0	0	0	0	0	0	0	0	0	0	0	0	0	0	0	0	0	0	0	0	0	0	0	0	0	0	0	0
RPS_01	6.95	9.65	37.95	34.15	1.93	3891.880371	21249.6625	65.1853	0	7.3219	11.3395	1.0534	0	0	0	1.5589	12.9096	0	0.6315	0	0	0	0	0	0	0	0	0	0	0	0	0	0	0	0	0	0	0	0	0	0	0	0	0	0	0	0	0	0
RPS_01	5.52	6.26	23.91	19.68	1.29	3874.478027	21244.1525	56.9504	0.5543	8.7709	14.418	1.6021	0	0	0	1.6865	15.6688	0	0.3489	0	0	0	0	0	0	0	0	0	0	0	0	0	0	0	0	0	0	0	0	0	0	0	0	0	0	0	0	0	0
RPS_01	4.73	5.49	17.54	16.49	1.35	3978.89209	21244.225	68.5355	0.5952	8.0297	9.4139	1.0008	0	0	0	1.5782	10.1617	0.1575	0.5275	0	0	0	0	0	0	0	0	0	0	0	0	0	0	0	0	0	0	0	0	0	0	0	0	0	0	0	0	0	0
RPS_01	2.53	2.84	5.02	8.1	1.26	4063.663574	21343.115	79.4204	0.8206	4.4332	6.622	0.5335	0	0	0	0.9202	6.9462	0	0.3038	0	0	0	0	0	0	0	0	0	0	0	0	0	0	0	0	0	0	0	0	0	0	0	0	0	0	0	0	0	0
RPS_01	4.23	5.1	14.05	14.32	1.45	4113.260254	21328.035	67.6623	0	6.7368	10.8737	1.4124	0	0	0	1.1235	11.8763	0	0.3151	0	0	0	0	0	0	0	0	0	0	0	0	0	0	0	0	0	0	0	0	0	0	0	0	0	0	0	0	0	0
RPS_01	1.9	2.19	2.83	6.95	1.33	4118.335938	21329.195	91.408	1.0892	4.6551	1.1398	0.2289	0	0	0	0.3663	1.1128	0	0	0	0	0	0	0	0	0	0	0	0	0	0	0	0	0	0	0	0	0	0	0	0	0	0	0	0	0	0	0	0
RPS_01	4.21	5.09	13.92	14.47	1.46	4029.076416	21313.68	71.367	0.8063	5.5098	10.1048	0.7852	0	0	0	0.4118	11.0152	0	0	0	0	0	0	0	0	0	0	0	0	0	0	0	0	0	0	0	0	0	0	0	0	0	0	0	0	0	0	0	0
RPS_01	2.17	2.61	3.68	6.66	1.45	4054.092285	21314.84	88.4554	0.9661	4.968	1.9607	0.5284	0	0	0	0.4847	2.4723	0	0.1644	0	0	0	0	0	0	0	0	0	0	0	0	0	0	0	0	0	0	0	0	0	0	0	0	0	0	0	0	0	0
RPS_01	1.77	2.25	2.45	6.08	1.62	4123.411621	21309.91	91.9312	1.1164	3.8202	1.5477	0.1258	0	0	0	0	1.4587	0	0	0	0	0	0	0	0	0	0	0	0	0	0	0	0	0	0	0	0	0	0	0	0	0	0	0	0	0	0	0	0
RPS_01	3.78	4.53	11.24	14.9	1.43	4132.547852	21306.575	74.1932	1.3122	12.7785	2.1944	0.4532	2.3168	3.756	0	0	2.1064	0.3175	0	0	0	0	0	0.5719	0	0	0	0	0	0	0	0	0	0	0	0	0	0	0	0	0	0	0	0	0	0	0	0	0
RPS_01	3.76	4.21	11.12	12.44	1.25	4013.921875	21290.045	70.4122	1.557	17.9236	0	0.717	2.5157	4.9254	0	0	0	0.4181	0.2047	0	0	0	0	1.3263	0	0	0	0	0	0	0	0	0	0	0	0	0	0	0	0	0	0	0	0	0	0	0	0	0
RPS_01	6.71	7.81	35.38	22.14	1.36	4067.579102	21284.1	54.8284	0	8.6916	15.6947	1.5839	0	0.1162	0	1.3991	16.8295	0.2856	0.5708	0	0	0	0	0	0	0	0	0	0	0	0	0	0	0	0	0	0	0	0	0	0	0	0	0	0	0	0	0	0
RPS_01	11.8	17.15	109.36	83.77	2.11	4083.821289	21278.445	62.5124	2.2634	24.0283	0.1699	0.6088	3.0577	5.1593	0	0	0.2579	0.3415	0.751	0	0	0	0	0.8499	0	0	0	0	0	0	0	0	0	0	0	0	0	0	0	0	0	0	0	0	0	0	0	0	0
RPS_01	4	4.74	12.54	13.02	1.41	4140.233887	21271.92	70.6289	0.9048	5.482	10.0504	0.8061	0	0	0	0.8258	11.0503	0	0.2517	0	0	0	0	0	0	0	0	0	0	0	0	0	0	0	0	0	0	0	0	0	0	0	0	0	0	0	0	0	0
RPS_01	2.09	3.12	3.43	7.67	2.23	4038.720215	21271.195	91.1677	1.4042	3.2892	2.0652	0	0	0	0	0	2.0737	0	0	0	0	0	0	0	0	0	0	0	0	0	0	0	0	0	0	0	0	0	0	0	0	0	0	0	0	0	0	0	0
RPS_01	0.94	1.17	0.69	3.33	1.55	4040.460449	21272.1375	92.9514	1.19	2.4443	1.5951	0	0	0	0	0	1.8192	0	0	0	0	0	0	0	0	0	0	0	0	0	0	0	0	0	0	0	0	0	0	0	0	0	0	0	0	0	0	0	0
RPS_01	3.17	3.48	7.87	12.59	1.21	4108.909668	21268.005	82.5123	1.2005	4.3865	5.5717	0.2604	0	0	0	0.2147	5.8539	0	0	0	0	0	0	0	0	0	0	0	0	0	0	0	0	0	0	0	0	0	0	0	0	0	0	0	0	0	0	0	0
RPS_01	2.31	2.53	4.21	7.67	1.19	4145.45459	21245.53	86.9546	1.0449	3.9545	3.4835	0.3419	0	0	0	0.4655	3.755	0	0	0	0	0	0	0	0	0	0	0	0	0	0	0	0	0	0	0	0	0	0	0	0	0	0	0	0	0	0	0	0
RPS_01	4.47	4.92	15.68	15.19	1.21	4205.862793	21336.735	65.7378	0.5866	5.3205	13.1237	0.61	0	0	0	0.7174	13.6327	0	0.2714	0	0	0	0	0	0	0	0	0	0	0	0	0	0	0	0	0	0	0	0	0	0	0	0	0	0	0	0	0	0
RPS_01	4.96	5.86	19.3	16.2	1.4	4222.975098	21330.2825	52.4002	1.4972	24.1544	2.2561	0.3732	5.6707	10.6336	0	0.1908	0.6249	0.1775	1.4921	0	0	0	0	0.2943	0.2351	0	0	0	0	0	0	0	0	0	0	0	0	0	0	0	0	0	0	0	0	0	0	0	0
RPS_01	2.3	2.76	4.14	7.81	1.45	4182.514648	21323.83	88.3536	1.2267	5.5385	2.0651	0.3534	0	0	0	0.5633	1.8994	0	0	0	0	0	0	0	0	0	0	0	0	0	0	0	0	0	0	0	0	0	0	0	0	0	0	0	0	0	0	0	0
RPS_01	1.77	2.61	2.47	10.71	2.16	4244.583008	21307.88	91.6034	1.0159	4.8365	1.1864	0.1969	0	0	0	0.1908	0.97	0	0	0	0	0	0	0	0	0	0	0	0	0	0	0	0	0	0	0	0	0	0	0	0	0	0	0	0	0	0	0	0
RPS_01	6.71	8.17	35.34	23.73	1.48	4213.693848	21300.9925	48.3243	2.3561	31.2693	0.1086	0.9782	4.9751	9.0562	0	0	0	0.5697	0.4513	0	0	0	0	1.9112	0	0	0	0	0	0	0	0	0	0	0	0	0	0	0	0	0	0	0	0	0	0	0	0	0
RPS_01	2.7	3.2	5.74	8.83	1.4	4257.924805	21300.92	86.3923	1.164	6.7172	2.1963	0.4251	0	0	0	0.7167	2.0873	0	0.3011	0	0	0	0	0	0	0	0	0	0	0	0	0	0	0	0	0	0	0	0	0	0	0	0	0	0	0	0	0	0
RPS_01	5.55	6.24	24.22	18.66	1.26	4203.6875	21298.9625	65.0879	0.5836	6.3028	12.3954	1.0013	0	0	0	1.3817	12.7579	0	0.4892	0	0	0	0	0	0	0	0	0	0	0	0	0	0	0	0	0	0	0	0	0	0	0	0	0	0	0	0	0	0
RPS_01	3.98	4.49	12.44	13.17	1.27	4173.668457	21284.68	65.7545	0.5767	5.0999	12.902	1.0156	0	0	0	1.1806	13.1431	0	0.3278	0	0	0	0	0	0	0	0	0	0	0	0	0	0	0	0	0	0	0	0	0	0	0	0	0	0	0	0	0	0
RPS_01	3.29	3.84	8.5	10.27	1.37	4197.814209	21284.8975	59.4641	1.5521	22.9244	0	0.112	0.6202	14.9975	0	0	0	0	0	0	0	0	0	0.3298	0	0	0	0	0	0	0	0	0	0	0	0	0	0	0	0	0	0	0	0	0	0	0	0	0
RPS_01	3.71	4.03	10.8	11.72	1.18	4283.158203	21281.055	76.1865	0.8656	5.0061	7.9205	0.4224	0	0	0	0.5268	8.8904	0	0.1817	0	0	0	0	0	0	0	0	0	0	0	0	0	0	0	0	0	0	0	0	0	0	0	0	0	0	0	0	0	0
RPS_01	5.07	6.02	20.22	17.07	1.41	4267.061035	21262.5675	61.1886	0	6.4471	14.3973	0.7894	0	0	0	0.8717	15.019	0.2286	0.4049	0	0	0.1883	0	0.2277	0.2374	0	0	0	0	0	0	0	0	0	0	0	0	0	0	0	0	0	0	0	0	0	0	0	0
RPS_01	2.75	3.01	5.92	8.68	1.2	4213.983887	21263.365	81.0674	0.9781	3.4886	6.8953	0.1641	0	0	0	0.151	7.2555	0	0	0	0	0	0	0	0	0	0	0	0	0	0	0	0	0	0	0	0	0	0	0	0	0	0	0	0	0	0	0	0
RPS_01	3.47	4.29	9.44	18.66	1.53	4187.735352	21259.885	79.1364	1.0738	4.3667	6.8451	0.5558	0	0	0	0.7276	6.9777	0	0.3169	0	0	0	0	0	0	0	0	0	0	0	0	0	0	0	0	0	0	0	0	0	0	0	0	0	0	0	0	0	0
RPS_01	4.46	5.83	15.64	15.19	1.71	4268.65625	21253.4325	70.157	1.8564	17.7365	0.1823	0.5829	2.6594	5.2571	0	0	0	0.5871	0	0	0	0	0	0.9814	0	0	0	0	0	0	0	0	0	0	0	0	0	0	0	0	0	0	0	0	0	0	0	0	0
RPS_01	3.91	4.53	12.04	12.59	1.34	4249.94873	21245.965	60.0067	1.7153	22.4983	0.5226	0	3.5536	9.437	0	0	0	2.0622	0	0	0	0	0	0.2043	0	0	0	0	0	0	0	0	0	0	0	0	0	0	0	0	0	0	0	0	0	0	0	0	0
RPS_01	7.69	8.35	46.5	25.03	1.18	4169.317871	21236.6125	37.9661	1.8937	34.5449	1.9206	0.209	10.332	10.3152	0	0.1972	1.6908	0.1617	0.2088	0	0	0	0	0.5599	0	0	0	0	0	0	0	0	0	0	0	0	0	0	0	0	0	0	0	0	0	0	0	0	0
RPS_01	3.2	3.66	8.02	10.56	1.31	4394.323242	21337.895	80.6894	0.8314	3.7702	7.0765	0.2021	0	0	0	0.1358	7.2947	0	0	0	0	0	0	0	0	0	0	0	0	0	0	0	0	0	0	0	0	0	0	0	0	0	0	0	0	0	0	0	0
RPS_01	4.71	6.45	17.42	16.64	1.87	4346.466797	21332.8925	66.5467	1.3873	7.6345	10.6918	0.8734	0.2547	0.6823	0	1.0034	10.3867	0	0.3012	0	0	0	0	0.238	0	0	0	0	0	0	0	0	0	0	0	0	0	0	0	0	0	0	0	0	0	0	0	0	0
RPS_01	1.63	2.02	2.09	5.64	1.52	4389.392578	21333.545	89.9438	0.9694	3.7777	2.4247	0.195	0	0	0	0.1556	2.5337	0	0	0	0	0	0	0	0	0	0	0	0	0	0	0	0	0	0	0	0	0	0	0	0	0	0	0	0	0	0	0	0
RPS_01	5.53	6.74	24.03	18.66	1.48	4300.640625	21327.9625	52.11	2.2257	28.7939	0	0.4725	6.7224	7.8806	0	0	0	0.3996	0.1777	0	0	0	0	1.2176	0	0	0	0	0	0	0	0	0	0	0	0	0	0	0	0	0	0	0	0	0	0	0	0	0
RPS_01	5.56	6.53	24.28	19.53	1.38	4386.347168	21327.9625	51.3013	1.6099	25.9066	1.8313	0.4829	6.7635	7.7158	0	0.1387	1.8444	1.037	0	0.1916	0	0	0	0.9454	0.2317	0	0	0	0	0	0	0	0	0	0	0	0	0	0	0	0	0	0	0	0	0	0	0	0
RPS_01	3.58	3.9	10.07	11.58	1.18	4338.925781	21324.265	71.1247	0.8623	6.7028	9.5495	0.853	0	0	0	0.8391	9.8043	0	0.2643	0	0	0	0	0	0	0	0	0	0	0	0	0	0	0	0	0	0	0	0	0	0	0	0	0	0	0	0	0	0
RPS_01	4.85	5.23	18.44	15.63	1.16	4388.522461	21314.405	61.0333	2.1024	24.1117	0	0.2814	4.5927	6.5945	0	0	0	0.1597	0	0	0	0	0	1.1243	0	0	0	0	0	0	0	0	0	0	0	0	0	0	0	0	0	0	0	0	0	0	0	0	0
RPS_01	4.07	4.49	12.98	13.6	1.22	4412.160645	21314.405	73.6957	0.714	5.016	9.2497	0.7165	0	0	0	0.8606	9.5823	0	0.1652	0	0	0	0	0	0	0	0	0	0	0	0	0	0	0	0	0	0	0	0	0	0	0	0	0	0	0	0	0	0
RPS_01	3.93	4.35	12.14	13.6	1.22	4348.49707	21293.96	81.1139	1.253	7.0199	4.0463	0.6389	0	0	0	0.9821	4.5385	0	0.4073	0	0	0	0	0	0	0	0	0	0	0	0	0	0	0	0	0	0	0	0	0	0	0	0	0	0	0	0	0	0
RPS_01	3.97	7.84	12.39	18.81	3.9	4439.859375	21277.3575	89.9801	1.8067	4.1914	2.0049	0	0	0	0	0	2.0169	0	0	0	0	0	0	0	0	0	0	0	0	0	0	0	0	0	0	0	0	0	0	0	0	0	0	0	0	0	0	0	0
RPS_01	4.09	4.81	13.13	15.92	1.38	4329.209473	21273.225	67.4738	0.5213	4.8154	12.7616	0.6176	0	0	0	0.314	13.4963	0	0	0	0	0	0	0	0	0	0	0	0	0	0	0	0	0	0	0	0	0	0	0	0	0	0	0	0	0	0	0	0
RPS_01	1.8	2.46	2.53	6.95	1.88	4317.60791	21258.725	92.7109	1.185	3.08	1.4843	0	0	0	0	0	1.5399	0	0	0	0	0	0	0	0	0	0	0	0	0	0	0	0	0	0	0	0	0	0	0	0	0	0	0	0	0	0	0	0
RPS_01	4.79	5.88	17.98	16.93	1.51	4323.263672	21255.6075	74.6376	0.8685	6.8625	7.6694	0.7899	0	0	0	0.6616	8.5105	0	0	0	0	0	0	0	0	0	0	0	0	0	0	0	0	0	0	0	0	0	0	0	0	0	0	0	0	0	0	0	0
RPS_01	3.13	3.63	7.7	9.4	1.34	4372.715332	21253.215	76.1339	0.77	4.5494	8.6435	0.4676	0	0	0	0.4927	8.9429	0	0	0	0	0	0	0	0	0	0	0	0	0	0	0	0	0	0	0	0	0	0	0	0	0	0	0	0	0	0	0	0
RPS_01	2.85	3.16	6.39	9.4	1.23	4328.339355	21241.18	83.5767	1.6398	4.9041	4.3507	0.5309	0	0	0	0.4544	4.5435	0	0	0	0	0	0	0	0	0	0	0	0	0	0	0	0	0	0	0	0	0	0	0	0	0	0	0	0	0	0	0	0
RPS_01	5.55	6.59	24.2	19.82	1.41	4317.60791	21239.2225	57.898	1.7101	24.471	0	6.1746	1.1787	7.5906	0	0	0.3685	0.1822	0	0	0	0	0	0.4263	0	0	0	0	0	0	0	0	0	0	0	0	0	0	0	0	0	0	0	0	0	0	0	0	0
RPS_01	3.06	4.09	7.37	11.14	1.78	4433.188477	21234.945	85.9846	1.4644	5.0611	3.4282	0.3288	0	0	0	0.2831	3.4498	0	0	0	0	0	0	0	0	0	0	0	0	0	0	0	0	0	0	0	0	0	0	0	0	0	0	0	0	0	0	0	0
RPS_01	2.75	3.21	5.95	9.26	1.36	4361.258789	21234.51	80.3952	1.5919	11.7901	0	0.3541	1.4333	2.6448	0	0	0	0.2971	1.0155	0	0	0	0	0.4779	0	0	0	0	0	0	0	0	0	0	0	0	0	0	0	0	0	0	0	0	0	0	0	0	0
RPS_01	5	5.67	19.64	17.22	1.29	4404.32959	21232.6975	65.804	0.6645	7.4113	10.5085	0.6209	1.0856	1.817	0	0.7175	10.5885	0.4196	0.3627	0	0	0	0	0	0	0	0	0	0	0	0	0	0	0	0	0	0	0	0	0	0	0	0	0	0	0	0	0	0
RPS_01	2.97	3.37	6.95	9.4	1.28	4384.461914	21231.03	79.5919	0.8074	4.9844	6.5761	0.5138	0	0	0	0.6453	6.7005	0	0.1806	0	0	0	0	0	0	0	0	0	0	0	0	0	0	0	0	0	0	0	0	0	0	0	0	0	0	0	0	0	0
RPS_01	4	5.17	12.54	13.89	1.67	4451.105957	21338.91	76.4517	2.916	15.4809	0.1401	0.1461	1.203	1.8028	0	0	0.1914	0	1.0173	0	0	0	0	0.6508	0	0	0	0	0	0	0	0	0	0	0	0	0	0	0	0	0	0	0	0	0	0	0	0	0
RPS_01	5.81	6.61	26.52	21.56	1.29	4574.517578	21338.1125	56.8797	0	8.0144	15.5025	1.2594	0	0	0	1.2405	16.214	0.207	0.403	0	0	0	0	0	0.2795	0	0	0	0	0	0	0	0	0	0	0	0	0	0	0	0	0	0	0	0	0	0	0	0
RPS_01	5.83	6.95	26.69	21.7	1.42	4501.717773	21334.3425	63.9327	0.5248	7.8548	11.3556	1.2007	0	0	0	1.6333	12.8584	0	0.6397	0	0	0	0	0	0	0	0	0	0	0	0	0	0	0	0	0	0	0	0	0	0	0	0	0	0	0	0	0	0
RPS_01	2.59	3.2	5.28	10.27	1.53	4494.611816	21335.14	80.9548	0.8557	3.1115	7.4222	0.1136	0	0	0	0	7.5422	0	0	0	0	0	0	0	0	0	0	0	0	0	0	0	0	0	0	0	0	0	0	0	0	0	0	0	0	0	0	0	0
RPS_01	2.72	4.14	5.82	10.13	2.32	4493.306641	21331.225	81.8975	0.958	2.8015	6.9104	0.1412	0	0	0	0	7.2914	0	0	0	0	0	0	0	0	0	0	0	0	0	0	0	0	0	0	0	0	0	0	0	0	0	0	0	0	0	0	0	0
RPS_01	9.19	13.16	66.32	35.01	2.05	4479.674805	21324.9175	31.4572	2.1082	39.6242	0	0.59	9.9664	12.9886	0	0	0	1.8522	0	0	0	0	0	1.4132	0	0	0	0	0	0	0	0	0	0	0	0	0	0	0	0	0	0	0	0	0	0	0	0	0
RPS_01	3.11	3.41	7.58	10.13	1.2	4520.425293	21328.035	79.3397	1.0173	6.1316	5.748	0.5853	0	0	0	0.7286	6.1939	0	0.2555	0	0	0	0	0	0	0	0	0	0	0	0	0	0	0	0	0	0	0	0	0	0	0	0	0	0	0	0	0	0
RPS_01	2.24	2.53	3.96	7.38	1.27	4495.336914	21327.165	92.4496	1.3152	3.1233	1.5068	0	0	0	0	0	1.6051	0	0	0	0	0	0	0	0	0	0	0	0	0	0	0	0	0	0	0	0	0	0	0	0	0	0	0	0	0	0	0	0
RPS_01	2.05	2.69	3.31	7.23	1.72	4488.666016	21327.165	87.1986	1.0389	2.7127	4.4047	0.1329	0	0	0	0	4.5122	0	0	0	0	0	0	0	0	0	0	0	0	0	0	0	0	0	0	0	0	0	0	0	0	0	0	0	0	0	0	0	0
RPS_01	7.41	8.71	43.15	26.04	1.38	4546.673828	21322.5975	53.0477	2.2315	28.8888	0	0.8671	4.6364	8.0892	0	0	0	0.6338	0.3256	0	0	0	0	1.2797	0	0	0	0	0	0	0	0	0	0	0	0	0	0	0	0	0	0	0	0	0	0	0	0	0
RPS_01	2.75	3.02	5.92	8.97	1.21	4528.111328	21324.12	82.5916	1.7759	11.0359	0	0.1407	2.0182	2.159	0	0	0	0	0	0	0	0	0	0.2786	0	0	0	0	0	0	0	0	0	0	0	0	0	0	0	0	0	0	0	0	0	0	0	0	0
RPS_01	3.72	4.53	10.86	12.15	1.48	4460.677246	21322.815	57.3842	1.6726	24.7575	0	1.0673	4.0643	7.9625	0	0.2388	0.2643	0.6514	0.9685	0	0	0	0	0.9686	0	0	0	0	0	0	0	0	0	0	0	0	0	0	0	0	0	0	0	0	0	0	0	0	0
RPS_01	2.08	2.5	3.39	6.66	1.44	4572.777344	21317.015	89.1118	1.2684	5.6527	1.5047	0.3956	0	0	0	0.4841	1.4032	0	0.1795	0	0	0	0	0	0	0	0	0	0	0	0	0	0	0	0	0	0	0	0	0	0	0	0	0	0	0	0	0	0
RPS_01	2.82	4.88	6.24	13.46	3	4582.856201	21307.2275	90.3652	1.2424	3.2919	2.5138	0	0	0	0	0	2.5868	0	0	0	0	0	0	0	0	0	0	0	0	0	0	0	0	0	0	0	0	0	0	0	0	0	0	0	0	0	0	0	0
RPS_01	3.31	4.83	8.63	16.93	2.12	4589.019531	21305.27	86.7884	1.4472	5.1599	2.4779	0.3881	0	0	0	0.8595	2.4939	0	0.3851	0	0	0	0	0	0	0	0	0	0	0	0	0	0	0	0	0	0	0	0	0	0	0	0	0	0	0	0	0	0
RPS_01	4.62	6.42	16.75	19.24	1.93	4509.693848	21303.965	54.8709	1.6684	26.8243	0.139	0.6938	3.4392	10.4053	0	0	0	0.363	0.3171	0	0	0	0	1.2789	0	0	0	0	0	0	0	0	0	0	0	0	0	0	0	0	0	0	0	0	0	0	0	0	0
RPS_01	2.39	5.24	4.48	11.72	4.82	4581.913574	21302.95	91.0931	1.2169	3.0337	2.2817	0	0	0	0	0	2.3746	0	0	0	0	0	0	0	0	0	0	0	0	0	0	0	0	0	0	0	0	0	0	0	0	0	0	0	0	0	0	0	0
RPS_01	4.16	5	13.59	13.75	1.44	4472.061279	21298.745	63.8428	0	4.9238	14.5327	0.7937	0	0	0	0.9427	14.6976	0	0.2668	0	0	0	0	0	0	0	0	0	0	0	0	0	0	0	0	0	0	0	0	0	0	0	0	0	0	0	0	0	0
RPS_01	2.58	2.91	5.21	8.25	1.27	4555.810059	21299.18	83.2782	0.9578	4.5605	4.9809	0.4191	0	0	0	0.5642	5.2394	0	0	0	0	0	0	0	0	0	0	0	0	0	0	0	0	0	0	0	0	0	0	0	0	0	0	0	0	0	0	0	0
RPS_01	7.93	10.01	49.43	25.47	1.59	4473.874023	21285.115	43.4577	2.2997	36.4288	0	0	8.6224	8.1805	0	0	0	0	0	0	0	0	0	0.7049	0.306	0	0	0	0	0	0	0	0	0	0	0	0	0	0	0	0	0	0	0	0	0	0	0	0
RPS_01	3.22	4.26	8.14	11.72	1.75	4449.945801	21286.855	87.4925	1.3939	4.1066	3.4722	0	0	0	0	0	3.5347	0	0	0	0	0	0	0	0	0	0	0	0	0	0	0	0	0	0	0	0	0	0	0	0	0	0	0	0	0	0	0	0
RPS_01	2.55	3.66	5.09	9.55	2.07	4446.610352	21286.2025	87.2361	0.7898	3.1415	4.3771	0	0	0	0	0	4.4555	0	0	0	0	0	0	0	0	0	0	0	0	0	0	0	0	0	0	0	0	0	0	0	0	0	0	0	0	0	0	0	0
RPS_01	6.06	9.61	28.83	26.04	2.51	4553.779785	21280.1125	56.6661	1.6869	23.739	1.3014	0.4476	4.7602	9.7565	0	0	0	0.3118	0.2704	0	0	0	0	0.8127	0.2473	0	0	0	0	0	0	0	0	0	0	0	0	0	0	0	0	0	0	0	0	0	0	0	0
RPS_01	4.21	5.28	13.94	15.34	1.57	4481.27002	21275.835	76.2492	1.0918	7.3284	6.3116	0.7714	0	0	0	1.0334	6.8424	0	0.3717	0	0	0	0	0	0	0	0	0	0	0	0	0	0	0	0	0	0	0	0	0	0	0	0	0	0	0	0	0	0
RPS_01	1.1	1.33	0.94	3.76	1.48	4540.292969	21277.5025	89.3704	1.0656	5.9742	0	0	0	3.5898	0	0	0	0	0	0	0	0	0	0	0	0	0	0	0	0	0	0	0	0	0	0	0	0	0	0	0	0	0	0	0	0	0	0	0
RPS_01	4.55	6.64	16.27	17.22	2.13	4537.392578	21274.4575	55.9103	1.2293	25.304	0	0	0.1285	17.1982	0	0	0	0	0	0	0	0	0	0	0.2297	0	0	0	0	0	0	0	0	0	0	0	0	0	0	0	0	0	0	0	0	0	0	0	0
RPS_01	2.76	3.25	5.99	9.26	1.39	4590.179688	21276.125	84.454	1.1884	6.9321	2.6918	0.6022	0	0	0	0.8472	3.0452	0	0.2392	0	0	0	0	0	0	0	0	0	0	0	0	0	0	0	0	0	0	0	0	0	0	0	0	0	0	0	0	0	0
RPS_01	3.04	4.28	7.26	13.46	1.98	4448.785645	21275.69	85.6532	1.2483	4.192	4.1987	0.2189	0	0	0	0.1453	4.3436	0	0	0	0	0	0	0	0	0	0	0	0	0	0	0	0	0	0	0	0	0	0	0	0	0	0	0	0	0	0	0	0
RPS_01	6.61	7.72	34.31	23.15	1.36	4516.944824	21271.1225	45.4108	2.276	32.7943	0.1707	0.2442	7.6996	10.0917	0	0	0	0	0	0.3733	0	0	0	0.9393	0	0	0	0	0	0	0	0	0	0	0	0	0	0	0	0	0	0	0	0	0	0	0	0	0
RPS_01	2.26	3.07	4	7.67	1.85	4490.116211	21268.15	92.8126	1.4341	3.2655	1.2181	0	0	0	0	0	1.2697	0	0	0	0	0	0	0	0	0	0	0	0	0	0	0	0	0	0	0	0	0	0	0	0	0	0	0	0	0	0	0	0
RPS_01	4.38	4.92	15.09	15.77	1.26	4536.95752	21265.395	61.5706	1.6832	20.8307	0.2791	1.209	4.5401	6.6998	0	0.3093	0.3574	1.4327	0	0	0	0	0	1.0881	0	0	0	0	0	0	0	0	0	0	0	0	0	0	0	0	0	0	0	0	0	0	0	0	0
RPS_01	6.89	7.95	37.26	24.31	1.33	4531.301758	21261.6975	54.1171	0	6.6574	17.1198	0.9023	0.5488	1.3141	0	0.702	18.3259	0	0.3126	0	0	0	0	0	0	0	0	0	0	0	0	0	0	0	0	0	0	0	0	0	0	0	0	0	0	0	0	0	0
RPS_01	5.01	5.48	19.68	16.49	1.2	4451.686035	21247.125	61.0538	0	6.1906	15.1246	0.7499	0	0	0	1.1424	15.2906	0	0.4481	0	0	0	0	0	0	0	0	0	0	0	0	0	0	0	0	0	0	0	0	0	0	0	0	0	0	0	0	0	0
RPS_01	2.88	3.34	6.51	9.26	1.35	4542.613281	21243.21	80.478	1.1231	5.1805	5.502	0.4747	0	0	0	1.1173	5.6927	0	0.4317	0	0	0	0	0	0	0	0	0	0	0	0	0	0	0	0	0	0	0	0	0	0	0	0	0	0	0	0	0	0
RPS_01	4.96	5.97	19.32	15.63	1.45	4578.868164	21232.6975	61.7891	1.6474	24.4289	0	0	5.541	5.9073	0	0	0	0.2579	0	0	0	0	0	0.4284	0	0	0	0	0	0	0	0	0	0	0	0	0	0	0	0	0	0	0	0	0	0	0	0	0
RPS_01	2.22	2.48	3.87	7.23	1.24	4536.8125	21233.495	85.9271	1.0395	3.6895	4.0093	0.3439	0	0	0	0.5738	4.2307	0	0.186	0	0	0	0	0	0	0	0	0	0	0	0	0	0	0	0	0	0	0	0	0	0	0	0	0	0	0	0	0	0
RPS_01	4.78	5.86	17.94	15.19	1.5	4578.723145	21223.2575	60.5937	1.7704	24.5336	0	0.1193	6.0442	6.2766	0	0	0	0.263	0	0	0	0	0	0.3991	0	0	0	0	0	0	0	0	0	0	0	0	0	0	0	0	0	0	0	0	0	0	0	0	0
RPS_01	2.23	2.56	3.89	7.23	1.33	4536.95752	21223.91	88.1308	1.2199	3.284	3.1359	0.2456	0	0	0	0.447	3.3187	0	0.2182	0	0	0	0	0	0	0	0	0	0	0	0	0	0	0	0	0	0	0	0	0	0	0	0	0	0	0	0	0	0
RPS_01	2.86	4.62	6.43	13.31	2.6	4539.85791	21221.735	92.1105	1.3769	2.8427	1.7886	0	0	0	0	0	1.8813	0	0	0	0	0	0	0	0	0	0	0	0	0	0	0	0	0	0	0	0	0	0	0	0	0	0	0	0	0	0	0	0
RPS_01	4.08	4.95	13.08	13.46	1.47	4474.744141	21219.125	67.3752	0.5599	6.5761	11.1935	0.7528	0	0	0	0.9973	11.7171	0.2053	0.414	0	0	0	0	0.2088	0	0	0	0	0	0	0	0	0	0	0	0	0	0	0	0	0	0	0	0	0	0	0	0	0
RPS_01	3.78	4.27	11.2	12.44	1.28	4537.247559	21213.76	72.3675	0.761	5.7019	9.2894	0.8193	0	0	0	0.7367	10.0728	0	0.2514	0	0	0	0	0	0	0	0	0	0	0	0	0	0	0	0	0	0	0	0	0	0	0	0	0	0	0	0	0	0
RPS_01	2.33	2.7	4.25	7.67	1.35	4478.659668	21202.305	84.6821	0.9887	4.8353	4.2344	0.2898	0	0	0	0.631	4.1102	0	0.2284	0	0	0	0	0	0	0	0	0	0	0	0	0	0	0	0	0	0	0	0	0	0	0	0	0	0	0	0	0	0
RPS_01	4.4	4.85	15.2	14.9	1.22	4490.116211	21197.52	63.9505	0.6229	5.0302	13.691	0.962	0	0	0	1.0484	14.0253	0.2505	0.4192	0	0	0	0	0	0	0	0	0	0	0	0	0	0	0	0	0	0	0	0	0	0	0	0	0	0	0	0	0	0
RPS_01	5.32	6.12	22.23	18.81	1.32	4548.414063	21195.78	59.5112	1.5509	23.0161	0	2.6759	1.8393	4.8939	0	1.0558	0.2869	0.405	3.686	0.2463	0	0	0	0.8325	0	0	0	0	0	0	0	0	0	0	0	0	0	0	0	0	0	0	0	0	0	0	0	0	0
RPS_01	5.1	6.09	20.43	16.78	1.43	4473.874023	21184.6875	58.684	0.8781	9.8534	12.6458	1.1495	0.6822	1.3718	0	0.9453	13.5226	0	0.2673	0	0	0	0	0	0	0	0	0	0	0	0	0	0	0	0	0	0	0	0	0	0	0	0	0	0	0	0	0	0
RPS_01	2.3	2.61	4.17	7.38	1.28	4522.455566	21185.195	83.6947	0.873	4.6948	4.894	0.3298	0	0	0	0.258	5.2557	0	0	0	0	0	0	0	0	0	0	0	0	0	0	0	0	0	0	0	0	0	0	0	0	0	0	0	0	0	0	0	0
RPS_01	3.53	4.41	9.78	12.59	1.56	4532.316895	21180.265	79.8417	1.9048	13.2196	0	0.2015	1.6398	2.0485	0	0	0	0	0.6024	0	0	0	0	0.5416	0	0	0	0	0	0	0	0	0	0	0	0	0	0	0	0	0	0	0	0	0	0	0	0	0
RPS_01	4.14	4.71	13.44	13.75	1.3	4575.677734	21174.465	70.7348	0.834	6.652	9.5796	0.8407	0	0	0	0.7281	10.4318	0	0.199	0	0	0	0	0	0	0	0	0	0	0	0	0	0	0	0	0	0	0	0	0	0	0	0	0	0	0	0	0	0
RPS_01	5.07	5.88	20.16	17.36	1.34	4500.775146	21164.75	60.4075	1.9954	23.3651	0.5245	0.3129	5.4115	6.5974	0	0	0	0.6374	0.1769	0	0	0	0	0.5715	0	0	0	0	0	0	0	0	0	0	0	0	0	0	0	0	0	0	0	0	0	0	0	0	0
RPS_01	3.65	3.97	10.47	12.01	1.18	4527.096191	21164.46	71.3579	0.6929	4.094	11.3488	0.4888	0	0	0	0.375	11.6424	0	0	0	0	0	0	0	0	0	0	0	0	0	0	0	0	0	0	0	0	0	0	0	0	0	0	0	0	0	0	0	0
RPS_01	4.24	4.91	14.09	13.75	1.35	4577.998047	21158.95	71.5879	0.8461	6.5912	9.2083	0.7363	0	0	0	0.7997	9.9149	0	0.3156	0	0	0	0	0	0	0	0	0	0	0	0	0	0	0	0	0	0	0	0	0	0	0	0	0	0	0	0	0	0
RPS_01	2.72	2.98	5.8	8.83	1.21	4481.125	21147.495	78.739	0.8768	4.1625	6.8586	0.558	0	0	0	0.9428	7.5441	0	0.3182	0	0	0	0	0	0	0	0	0	0	0	0	0	0	0	0	0	0	0	0	0	0	0	0	0	0	0	0	0	0
RPS_01	4.63	5.73	16.85	15.77	1.53	4555.810059	21144.015	58.0942	1.832	25.4244	0.5032	0	5.267	7.7276	0	0.1718	0.4398	0	0	0	0	0	0	0.54	0	0	0	0	0	0	0	0	0	0	0	0	0	0	0	0	0	0	0	0	0	0	0	0	0
RPS_01	2.87	3.41	6.47	10.85	1.41	4538.262695	21144.16	85.2899	1.1652	5.3414	3.1795	0.5337	0	0	0	0.8772	3.2598	0	0.3534	0	0	0	0	0	0	0	0	0	0	0	0	0	0	0	0	0	0	0	0	0	0	0	0	0	0	0	0	0	0
RPS_01	1.69	2.11	2.24	5.35	1.56	4534.347168	21139.085	91.7928	1.2398	3.2457	1.8576	0	0	0	0	0	1.8641	0	0	0	0	0	0	0	0	0	0	0	0	0	0	0	0	0	0	0	0	0	0	0	0	0	0	0	0	0	0	0	0
RPS_01	1.62	2.02	2.05	5.06	1.55	4518.685059	21138.36	91.4097	0.932	4.4752	1.5013	0.1263	0	0	0	0.2861	1.2694	0	0	0	0	0	0	0	0	0	0	0	0	0	0	0	0	0	0	0	0	0	0	0	0	0	0	0	0	0	0	0	0
RPS_01	4	4.54	12.56	13.17	1.29	4521.585449	21135.895	70.198	0.6381	8.268	8.0473	1.417	0	0	0	1.5146	9.3804	0	0.5367	0	0	0	0	0	0	0	0	0	0	0	0	0	0	0	0	0	0	0	0	0	0	0	0	0	0	0	0	0	0
RPS_01	1.72	2.21	2.32	5.5	1.66	4514.479492	21135.315	89.6633	1.0132	3.461	2.6519	0.1581	0	0	0	0.1478	2.9047	0	0	0	0	0	0	0	0	0	0	0	0	0	0	0	0	0	0	0	0	0	0	0	0	0	0	0	0	0	0	0	0
RPS_01	2.05	2.56	3.31	9.26	1.56	4515.20459	21132.27	94.2438	1.5358	3.427	0.4223	0	0	0	0	0	0.3711	0	0	0	0	0	0	0	0	0	0	0	0	0	0	0	0	0	0	0	0	0	0	0	0	0	0	0	0	0	0	0	0
RPS_01	3.42	3.9	9.21	11	1.29	4551.314453	21128.065	74.9676	0.8228	8.3454	5.982	1.3584	0	0	0	1.4515	6.4666	0	0.6056	0	0	0	0	0	0	0	0	0	0	0	0	0	0	0	0	0	0	0	0	0	0	0	0	0	0	0	0	0	0
RPS_01	6.38	7.72	31.97	23.44	1.46	4488.085938	21122.1925	44.8321	1.4636	28.0489	5.2944	0.6219	6.2321	6.1355	0	0.8009	5.4295	0.1849	0.1759	0	0	0.1955	0	0.3406	0.2442	0	0	0	0	0	0	0	0	0	0	0	0	0	0	0	0	0	0	0	0	0	0	0	0
RPS_01	4.2	5.03	13.86	14.18	1.44	4581.768555	21106.155	68.641	0.8359	5.5302	11.2531	0.8345	0	0	0	0.8129	11.7946	0	0.2978	0	0	0	0	0	0	0	0	0	0	0	0	0	0	0	0	0	0	0	0	0	0	0	0	0	0	0	0	0	0
RPS_01	1.71	2.26	2.3	5.79	1.75	4562.335938	21097.745	90.6952	1.1023	4.507	1.7081	0.1838	0	0	0	0.2413	1.5622	0	0	0	0	0	0	0	0	0	0	0	0	0	0	0	0	0	0	0	0	0	0	0	0	0	0	0	0	0	0	0	0
RPS_01	7.08	9	39.42	29.66	1.61	4501.137695	21092.1625	57.4907	1.1836	21.619	3.2016	0.5888	0.5021	1.3364	0	0.4355	5.5687	0.1855	7.6443	0	0	0	0	0	0.2437	0	0	0	0	0	0	0	0	0	0	0	0	0	0	0	0	0	0	0	0	0	0	0	0
RPS_01	4.16	4.74	13.57	14.47	1.3	4485.185547	21092.38	72.182	0.8921	4.3021	10.3461	0.4682	0	0	0	0.6272	10.6933	0.1618	0.327	0	0	0	0	0	0	0	0	0	0	0	0	0	0	0	0	0	0	0	0	0	0	0	0	0	0	0	0	0	0
RPS_01	2.53	2.88	5.05	8.1	1.29	4549.429199	21092.96	86.0276	0.7519	5.2124	3.2028	0.5031	0	0	0	0.7929	3.292	0	0.2173	0	0	0	0	0	0	0	0	0	0	0	0	0	0	0	0	0	0	0	0	0	0	0	0	0	0	0	0	0	0
RPS_01	3.08	3.58	7.45	9.69	1.35	4450.960938	21083.4625	76.3388	1.0444	5.6397	7.0549	0.9735	0	0	0	1.0679	7.5932	0	0.2876	0	0	0	0	0	0	0	0	0	0	0	0	0	0	0	0	0	0	0	0	0	0	0	0	0	0	0	0	0	0
RPS_01	2.15	2.34	3.62	6.8	1.18	4462.272461	21081.36	85.6339	1.4963	8.7097	0	0.2287	1.0687	1.748	0	0.3061	0	0.1534	0.2959	0	0	0	0	0.3592	0	0	0	0	0	0	0	0	0	0	0	0	0	0	0	0	0	0	0	0	0	0	0	0	0
RPS_01	3.1	3.52	7.54	10.42	1.29	4552.18457	21076.285	78.4372	0.9224	3.9143	7.817	0.3415	0	0	0	0.2731	8.2945	0	0	0	0	0	0	0	0	0	0	0	0	0	0	0	0	0	0	0	0	0	0	0	0	0	0	0	0	0	0	0	0
RPS_01	3.27	3.76	8.37	11	1.32	4545.513672	21074.11	72.339	1.5287	16.596	0	1.0771	2.0498	5.5178	0	0	0	0.1982	0	0	0	0	0	0.6933	0	0	0	0	0	0	0	0	0	0	0	0	0	0	0	0	0	0	0	0	0	0	0	0	0
RPS_01	4.47	5.23	15.68	16.78	1.37	4460.387207	21073.24	66.3502	1.6082	20.585	0	0.2904	2.4984	7.641	0	0	0	0	0	0	0	0	0	1.0269	0	0	0	0	0	0	0	0	0	0	0	0	0	0	0	0	0	0	0	0	0	0	0	0	0
RPS_01	3.19	3.63	8	11.43	1.29	4474.599121	21067.44	75.1049	1.6624	14.5392	0	0	1.0933	7.3609	0	0	0	0	0	0	0	0	0	0.2394	0	0	0	0	0	0	0	0	0	0	0	0	0	0	0	0	0	0	0	0	0	0	0	0	0
RPS_01	3.06	3.33	7.35	10.13	1.19	4555.30249	21064.83	79.1502	0.7562	4.0097	7.6188	0.2938	0	0	0	0.1566	8.0147	0	0	0	0	0	0	0	0	0	0	0	0	0	0	0	0	0	0	0	0	0	0	0	0	0	0	0	0	0	0	0	0
RPS_01	2.98	3.56	6.99	8.97	1.42	4482.575195	21044.82	82.6027	0.9539	4.1365	5.7127	0.3007	0	0	0	0.3623	5.9312	0	0	0	0	0	0	0	0	0	0	0	0	0	0	0	0	0	0	0	0	0	0	0	0	0	0	0	0	0	0	0	0
RPS_01	3.21	3.58	8.08	11	1.25	4567.194092	21043.225	78.8345	0.9198	6.0168	5.9377	0.8081	0	0	0	0.9253	6.2526	0	0.3052	0	0	0	0	0	0	0	0	0	0	0	0	0	0	0	0	0	0	0	0	0	0	0	0	0	0	0	0	0	0
RPS_01	2.97	3.63	6.93	9.69	1.49	4527.966309	21030.32	82.8518	0.5966	4.4322	5.0729	0.5657	0	0	0	0.605	5.8758	0	0	0	0	0	0	0	0	0	0	0	0	0	0	0	0	0	0	0	0	0	0	0	0	0	0	0	0	0	0	0	0
RPS_01	2.38	2.66	4.44	7.38	1.25	4504.618164	21014.225	85.4513	1.4648	4.9441	3.9356	0.1241	0	0	0	0	4.0801	0	0	0	0	0	0	0	0	0	0	0	0	0	0	0	0	0	0	0	0	0	0	0	0	0	0	0	0	0	0	0	0
RPS_01	3.07	3.56	7.39	9.69	1.35	4549.719238	21013.065	78.9556	0	4.3722	7.4376	0.5418	0	0	0	0.5928	8.1	0	0	0	0	0	0	0	0	0	0	0	0	0	0	0	0	0	0	0	0	0	0	0	0	0	0	0	0	0	0	0	0
RPS_01	5.93	7.9	27.65	21.7	1.77	4570.457031	20988.3275	59.537	1.5018	21.0332	2.0067	0.6289	4.1862	6.9293	0	0.2136	2.8239	0.328	0.2427	0	0	0	0	0.5688	0	0	0	0	0	0	0	0	0	0	0	0	0	0	0	0	0	0	0	0	0	0	0	0	0
RPS_01	6.31	7.99	31.32	20.11	1.6	4509.403809	20976.8725	50.595	2.4008	29.1513	0.4115	0.7131	5.5533	7.8668	0	0.1585	0.3082	1.1154	0.2841	0.2638	0	0	0	0.9655	0.2125	0	0	0	0	0	0	0	0	0	0	0	0	0	0	0	0	0	0	0	0	0	0	0	0
RPS_01	3.82	4.47	11.45	11.72	1.37	4470.466064	20978.1775	68.4033	0	3.7447	13.2634	0.434	0	0	0	0.2426	13.9121	0	0	0	0	0	0	0	0	0	0	0	0	0	0	0	0	0	0	0	0	0	0	0	0	0	0	0	0	0	0	0	0
RPS_01	4.73	5.32	17.54	15.63	1.27	4523.978271	20977.67	70.6057	0.7571	5.1268	10.7852	0.6465	0	0	0	0.7181	11.1343	0	0.2264	0	0	0	0	0	0	0	0	0	0	0	0	0	0	0	0	0	0	0	0	0	0	0	0	0	0	0	0	0	0
RPS_01	3.67	4.24	10.55	12.15	1.34	4537.972656	20973.9725	76.5402	0.6413	4.4226	8.3613	0.4051	0	0.194	0	0.3504	9.085	0	0	0	0	0	0	0	0	0	0	0	0	0	0	0	0	0	0	0	0	0	0	0	0	0	0	0	0	0	0	0	0
RPS_01	2.97	4.34	6.95	12.01	2.12	4464.302734	20965.5625	91.2641	1.173	3.2768	1.5198	0.209	0	0	0	0.2667	2.2906	0	0	0	0	0	0	0	0	0	0	0	0	0	0	0	0	0	0	0	0	0	0	0	0	0	0	0	0	0	0	0	0
RPS_01	9.21	10.89	66.61	45.72	1.4	4557.840332	20961.575	54.2206	1.2688	23.9478	0.7647	0.5114	5.7	8.8872	0	0.3426	1.1567	0.5804	0.9022	0.5554	0	0	0	1.1622	0	0	0	0	0	0	0	0	0	0	0	0	0	0	0	0	0	0	0	0	0	0	0	0	0
RPS_01	2.2	2.61	3.79	6.95	1.41	4455.021484	20959.11	84.6521	0.8798	2.4565	5.6788	0.1312	0	0	0	0	6.2016	0	0	0	0	0	0	0	0	0	0	0	0	0	0	0	0	0	0	0	0	0	0	0	0	0	0	0	0	0	0	0	0
RPS_01	1.81	2.07	2.57	6.22	1.31	4534.202148	20956.5	91.0171	1.1927	4.1504	1.8348	0	0	0	0	0	1.805	0	0	0	0	0	0	0	0	0	0	0	0	0	0	0	0	0	0	0	0	0	0	0	0	0	0	0	0	0	0	0	0
RPS_01	4.59	6.53	16.54	15.05	2.02	4456.32666	20951.3525	73.1824	0.8613	6.0204	8.776	0.8803	0	0	0	0.9191	9.1128	0	0.2478	0	0	0	0	0	0	0	0	0	0	0	0	0	0	0	0	0	0	0	0	0	0	0	0	0	0	0	0	0	0
RPS_01	3.11	4.09	7.6	11.29	1.73	4508.388672	20947.22	83.4178	1.4523	6.3618	3.9572	0.3932	0	0	0	0.4485	3.7954	0	0.1738	0	0	0	0	0	0	0	0	0	0	0	0	0	0	0	0	0	0	0	0	0	0	0	0	0	0	0	0	0	0
RPS_01	3.8	5	11.33	12.73	1.73	4554.359863	20942.435	81.9372	1.0195	5.0295	5.381	0.4449	0	0	0	0.5198	5.478	0	0.19	0	0	0	0	0	0	0	0	0	0	0	0	0	0	0	0	0	0	0	0	0	0	0	0	0	0	0	0	0	0
RPS_01	5.12	6.04	20.58	17.36	1.39	4472.713867	20941.0575	64.8174	2.1006	21.1688	0	0.5598	3.6325	6.2146	0	0	0	0.3475	0.1904	0	0	0	0	0.9685	0	0	0	0	0	0	0	0	0	0	0	0	0	0	0	0	0	0	0	0	0	0	0	0	0
RPS_01	1.5	1.69	1.76	4.63	1.28	4505.633301	20940.1875	91.0968	1.16	3.6561	1.8659	0.1604	0	0	0	0	2.0607	0	0	0	0	0	0	0	0	0	0	0	0	0	0	0	0	0	0	0	0	0	0	0	0	0	0	0	0	0	0	0	0
RPS_01	3.22	3.97	8.12	11.29	1.53	4506.358398	20937.505	81.2835	1.4637	6.5227	4.4055	0.6839	0	0	0	0.6611	4.7901	0	0.1894	0	0	0	0	0	0	0	0	0	0	0	0	0	0	0	0	0	0	0	0	0	0	0	0	0	0	0	0	0	0
RPS_01	3.61	4.35	10.26	11.72	1.45	4489.971191	20935.475	77.5424	1.9147	13.6451	0	0.4144	1.9252	3.7253	0	0	0	0.231	0	0	0	0	0	0.6019	0	0	0	0	0	0	0	0	0	0	0	0	0	0	0	0	0	0	0	0	0	0	0	0	0
RPS_01	3.52	4.6	9.73	13.31	1.71	4475.324219	20931.125	78.5847	0.7323	6.0579	6.0587	0.6633	0	0	0	1.0466	6.4054	0	0.451	0	0	0	0	0	0	0	0	0	0	0	0	0	0	0	0	0	0	0	0	0	0	0	0	0	0	0	0	0	0
RPS_01	2.57	2.93	5.19	8.1	1.3	4578.723145	20928.515	85.7475	1.1107	4.4219	4.0951	0.2776	0	0	0	0.1816	4.1656	0	0	0	0	0	0	0	0	0	0	0	0	0	0	0	0	0	0	0	0	0	0	0	0	0	0	0	0	0	0	0	0
RPS_01	1.06	1.45	0.88	3.47	1.87	4576.547852	20929.0225	87.9199	0.5974	3.7039	2.4703	0.999	0.1067	0	0	0.8599	3.343	0	0	0	0	0	0	0	0	0	0	0	0	0	0	0	0	0	0	0	0	0	0	0	0	0	0	0	0	0	0	0	0
RPS_01	2.45	2.7	4.71	7.81	1.22	4488.956055	20928.08	90.1538	1.201	4.7014	1.6811	0.2566	0	0	0	0.1905	1.8157	0	0	0	0	0	0	0	0	0	0	0	0	0	0	0	0	0	0	0	0	0	0	0	0	0	0	0	0	0	0	0	0
RPS_01	3.43	4.85	9.25	11.72	2	4507.663574	20926.92	78.2831	1.3038	6.4495	6.1093	0.5196	0	0	0	0.8406	6.1912	0	0.3029	0	0	0	0	0	0	0	0	0	0	0	0	0	0	0	0	0	0	0	0	0	0	0	0	0	0	0	0	0	0
RPS_01	4.24	4.86	14.15	14.9	1.31	4479.094727	20925.76	62.1311	1.1699	20.3696	0.1621	0.6664	2.1662	12.1309	0	0	0	0.793	0	0	0	0	0	0.4108	0	0	0	0	0	0	0	0	0	0	0	0	0	0	0	0	0	0	0	0	0	0	0	0	0
RPS_01	11.92	16.34	111.5	66.41	1.88	4564.076172	20908.215	49.9189	1.981	30.4341	0.4625	0.4289	6.7611	7.4257	0	0	0.523	1.3363	0	0	0	0	0	0.7284	0	0	0	0	0	0	0	0	0	0	0	0	0	0	0	0	0	0	0	0	0	0	0	0	0
RPS_01	2.96	3.2	6.87	9.26	1.17	4473.583984	20904.445	80.7397	0.9366	5.1873	5.5531	0.6713	0	0	0	0.6162	6.2959	0	0	0	0	0	0	0	0	0	0	0	0	0	0	0	0	0	0	0	0	0	0	0	0	0	0	0	0	0	0	0	0
RPS_01	3.47	5.34	9.48	18.52	2.36	4462.852539	20900.965	91.1083	1.5135	5.1755	0.8894	0.1769	0	0	0	0.2768	0.8595	0	0	0	0	0	0	0	0	0	0	0	0	0	0	0	0	0	0	0	0	0	0	0	0	0	0	0	0	0	0	0	0
RPS_01	3.83	4.26	11.53	12.59	1.23	4486.635742	20894.875	74.5274	0.8208	7.8278	6.9324	0.7297	0	0	0	1.5027	7.2031	0	0.4562	0	0	0	0	0	0	0	0	0	0	0	0	0	0	0	0	0	0	0	0	0	0	0	0	0	0	0	0	0	0
RPS_01	2.43	2.81	4.63	8.1	1.34	4532.461914	20888.35	82.114	0.8815	5.1227	5.0962	0.5233	0	0	0	0.2695	5.9928	0	0	0	0	0	0	0	0	0	0	0	0	0	0	0	0	0	0	0	0	0	0	0	0	0	0	0	0	0	0	0	0
RPS_01	3.02	4.57	7.18	15.05	2.28	4462.852539	20881.52	90.7071	1.6786	4.078	1.5672	0.2159	0	0	0	0.1763	1.577	0	0	0	0	0	0	0	0	0	0	0	0	0	0	0	0	0	0	0	0	0	0	0	0	0	0	0	0	0	0	0	0
RPS_01	3.7	4.12	10.74	11.72	1.24	4486.345703	20875.575	74.9701	1.2148	6.8664	6.9975	0.7601	0	0	0	1.2719	7.4797	0	0.4395	0	0	0	0	0	0	0	0	0	0	0	0	0	0	0	0	0	0	0	0	0	0	0	0	0	0	0	0	0	0
RPS_01	2.38	2.7	4.46	7.67	1.29	4532.316895	20868.905	82.9238	0.9677	4.5323	5.0124	0.5782	0	0	0	0.3391	5.6465	0	0	0	0	0	0	0	0	0	0	0	0	0	0	0	0	0	0	0	0	0	0	0	0	0	0	0	0	0	0	0	0
RPS_01	2.06	2.7	3.33	6.95	1.72	4579.375732	20865.425	90.6343	1.3377	3.6284	2.1655	0.1311	0	0	0	0	2.1032	0	0	0	0	0	0	0	0	0	0	0	0	0	0	0	0	0	0	0	0	0	0	0	0	0	0	0	0	0	0	0	0
RPS_01	3.54	4.2	9.82	11.86	1.41	4521.150391	20849.62	71.6893	0.8463	8.7935	7.5303	1.1079	0	0	0	1.3853	8.107	0	0.5404	0	0	0	0	0	0	0	0	0	0	0	0	0	0	0	0	0	0	0	0	0	0	0	0	0	0	0	0	0	0
RPS_01	2.81	3.12	6.2	9.26	1.24	4448.060547	20846.43	83.1779	0.995	6.2738	3.6267	0.7321	0	0	0	0.8963	4.0291	0	0.269	0	0	0	0	0	0	0	0	0	0	0	0	0	0	0	0	0	0	0	0	0	0	0	0	0	0	0	0	0	0
RPS_01	2.7	2.93	5.72	8.54	1.18	4529.851563	20843.82	82.976	1.0036	6.0465	4.0648	0.5461	0	0	0	0.797	4.2738	0	0.2921	0	0	0	0	0	0	0	0	0	0	0	0	0	0	0	0	0	0	0	0	0	0	0	0	0	0	0	0	0	0
RPS_01	4.06	4.47	12.94	12.88	1.21	4560.450684	20837.44	66.7118	0.5454	3.4896	13.5348	0.5975	0.1062	0	0	0.485	14.5296	0	0	0	0	0	0	0	0	0	0	0	0	0	0	0	0	0	0	0	0	0	0	0	0	0	0	0	0	0	0	0	0
RPS_01	2.43	2.88	4.63	10.42	1.41	4464.085205	20836.4975	87.5193	0.8532	2.9058	3.7129	0.299	0	0	0	0.2702	4.4396	0	0	0	0	0	0	0	0	0	0	0	0	0	0	0	0	0	0	0	0	0	0	0	0	0	0	0	0	0	0	0	0
RPS_01	2.71	2.98	5.78	9.26	1.21	4553.997314	20833.525	75.5376	0	5.917	6.8187	1.1371	0	0	0	1.5587	8.3071	0.1609	0.5631	0	0	0	0	0	0	0	0	0	0	0	0	0	0	0	0	0	0	0	0	0	0	0	0	0	0	0	0	0	0
RPS_01	5.17	6.81	20.96	17.51	1.74	4574.952637	20809.8175	62.7121	1.7455	22.8444	0	0.1311	5.1994	6.0572	0	0	0	0.1807	0	0	0	0	0	1.1294	0	0	0	0	0	0	0	0	0	0	0	0	0	0	0	0	0	0	0	0	0	0	0	0	0
RPS_01	1.92	2.36	2.89	6.95	1.51	4588.874512	20809.6	93.5187	1.1409	3.7399	0.8782	0	0	0	0	0	0.7222	0	0	0	0	0	0	0	0	0	0	0	0	0	0	0	0	0	0	0	0	0	0	0	0	0	0	0	0	0	0	0	0
RPS_01	1.13	1.51	1	5.06	1.78	4487.36084	20804.3075	93.9946	1.1147	3.2556	0.7824	0	0	0	0	0	0.8526	0	0	0	0	0	0	0	0	0	0	0	0	0	0	0	0	0	0	0	0	0	0	0	0	0	0	0	0	0	0	0	0
RPS_01	3.72	5.42	10.89	14.9	2.12	4449.945801	20801.48	78.2962	0.7595	4.7828	6.7535	0.7207	0	0	0	0.8019	7.586	0	0.2993	0	0	0	0	0	0	0	0	0	0	0	0	0	0	0	0	0	0	0	0	0	0	0	0	0	0	0	0	0	0
RPS_01	1.39	1.65	1.51	4.63	1.42	4487.505859	20802.7125	93.2452	0.918	2.4032	1.7007	0	0	0	0	0	1.733	0	0	0	0	0	0	0	0	0	0	0	0	0	0	0	0	0	0	0	0	0	0	0	0	0	0	0	0	0	0	0	0
RPS_01	4.38	7.76	15.09	17.94	3.13	4513.899414	20796.3325	79.2907	1.1323	5.6216	6.6609	0.3963	0	0	0	0.4722	6.426	0	0	0	0	0	0	0	0	0	0	0	0	0	0	0	0	0	0	0	0	0	0	0	0	0	0	0	0	0	0	0	0
RPS_01	2.69	4.21	5.67	9.98	2.45	4478.224609	20795.535	85.7405	1.0511	3.0629	4.8424	0.1618	0	0	0	0	5.1413	0	0	0	0	0	0	0	0	0	0	0	0	0	0	0	0	0	0	0	0	0	0	0	0	0	0	0	0	0	0	0	0
RPS_01	3.03	5.19	7.2	11	2.94	4480.834961	20793.795	91.6247	2.0576	3.561	1.3373	0	0	0	0	0	1.4194	0	0	0	0	0	0	0	0	0	0	0	0	0	0	0	0	0	0	0	0	0	0	0	0	0	0	0	0	0	0	0	0
RPS_01	9.14	10.36	65.59	31.98	1.28	4490.40625	20791.185	55.6157	1.1664	19.0951	5.8946	1.6644	2.7076	5.568	0	0.5278	5.5152	0.6182	0.4677	0	0	0	0	1.1593	0	0	0	0	0	0	0	0	0	0	0	0	0	0	0	0	0	0	0	0	0	0	0	0	0
RPS_01	2.97	4.94	6.93	11.72	2.77	4467.493164	20793.36	79.8268	1.0891	7.4935	3.8685	1.0274	0	0	0	1.6	4.5127	0	0.5822	0	0	0	0	0	0	0	0	0	0	0	0	0	0	0	0	0	0	0	0	0	0	0	0	0	0	0	0	0	0
RPS_01	4.02	4.95	12.67	14.18	1.52	4507.953613	20791.91	74.7639	1.8216	15.3591	0.5985	0.2003	2.323	2.8402	0	0.6779	0.188	0.1879	0.5859	0	0	0	0	0.4537	0	0	0	0	0	0	0	0	0	0	0	0	0	0	0	0	0	0	0	0	0	0	0	0	0
RPS_01	2.03	2.61	3.22	6.66	1.66	4477.354492	20792.345	84.8247	0.736	2.4925	5.8541	0	0	0	0	0	6.0928	0	0	0	0	0	0	0	0	0	0	0	0	0	0	0	0	0	0	0	0	0	0	0	0	0	0	0	0	0	0	0	0
RPS_01	3.43	3.81	9.23	11.29	1.23	4457.196777	20785.53	69.6965	0	5.073	10.8961	0.7919	0	0	0	0.9364	11.8056	0.1842	0.3949	0	0	0	0	0	0.2215	0	0	0	0	0	0	0	0	0	0	0	0	0	0	0	0	0	0	0	0	0	0	0	0
RPS_01	2.65	3.52	5.51	11	1.77	4485.040527	20783.21	90.5475	1.4221	5.0228	1.4206	0.1576	0	0	0	0.1576	1.2718	0	0	0	0	0	0	0	0	0	0	0	0	0	0	0	0	0	0	0	0	0	0	0	0	0	0	0	0	0	0	0	0
RPS_01	6.88	9.64	37.22	36.17	1.96	4540.292969	20774.0025	49.4603	2.3533	31.279	0.1645	0.4554	5.4592	8.5734	0	0	0	0.382	0.2161	0	0	0	0	1.6568	0	0	0	0	0	0	0	0	0	0	0	0	0	0	0	0	0	0	0	0	0	0	0	0	0
RPS_01	6.15	7.16	29.75	21.56	1.35	4531.156738	20757.3125	52.1189	1.44	29.5097	0	0.8554	4.6698	9.1461	0	0	0	0.7035	0.3478	0	0	0	0	1.209	0	0	0	0	0	0	0	0	0	0	0	0	0	0	0	0	0	0	0	0	0	0	0	0	0
RPS_01	2.56	2.76	5.15	8.39	1.17	4560.595703	20755.935	84.0265	1.0854	4.7626	4.327	0.4576	0	0	0	0.6467	4.4089	0	0.2852	0	0	0	0	0	0	0	0	0	0	0	0	0	0	0	0	0	0	0	0	0	0	0	0	0	0	0	0	0	0
RPS_01	2.7	3.21	5.74	8.97	1.41	4515.639648	20754.485	81.0785	1.096	5.3629	5.6236	0.1563	0	0	0	0.5359	5.8494	0	0.2975	0	0	0	0	0	0	0	0	0	0	0	0	0	0	0	0	0	0	0	0	0	0	0	0	0	0	0	0	0	0
RPS_01	2.69	3.58	5.69	8.83	1.77	4535.652344	20748.685	83.2592	0.9417	4.2474	5.2387	0.3383	0	0	0	0.5618	5.413	0	0	0	0	0	0	0	0	0	0	0	0	0	0	0	0	0	0	0	0	0	0	0	0	0	0	0	0	0	0	0	0
RPS_01	4.54	4.91	16.18	14.47	1.17	4586.119141	20737.665	60.016	0	3.5192	16.984	0.5161	0	0.1518	0	0.5423	17.8224	0	0.2208	0	0	0	0	0	0.2274	0	0	0	0	0	0	0	0	0	0	0	0	0	0	0	0	0	0	0	0	0	0	0	0
RPS_01	1.64	2.2	2.11	5.79	1.8	4470.538574	20737.81	93.3226	1.3401	3.0409	1.1783	0	0	0	0	0	1.1181	0	0	0	0	0	0	0	0	0	0	0	0	0	0	0	0	0	0	0	0	0	0	0	0	0	0	0	0	0	0	0	0
RPS_01	1.28	1.45	1.28	4.2	1.29	4468.363281	20737.5925	91.1393	0.8538	2.5543	2.5837	0	0	0	0	0	2.8689	0	0	0	0	0	0	0	0	0	0	0	0	0	0	0	0	0	0	0	0	0	0	0	0	0	0	0	0	0	0	0	0
RPS_01	1.19	1.43	1.11	3.47	1.44	4467.203125	20735.5625	92.3061	0.7313	2.6093	2.1261	0	0	0	0	0	2.2271	0	0	0	0	0	0	0	0	0	0	0	0	0	0	0	0	0	0	0	0	0	0	0	0	0	0	0	0	0	0	0	0
RPS_01	1.62	1.83	2.05	5.21	1.28	4469.523438	20735.345	92.1373	1.1077	2.1061	2.2599	0	0	0	0	0	2.3891	0	0	0	0	0	0	0	0	0	0	0	0	0	0	0	0	0	0	0	0	0	0	0	0	0	0	0	0	0	0	0	0
RPS_01	3.03	4.08	7.2	12.15	1.82	4474.599121	20733.605	86.2075	1.2609	5.0249	3.423	0.2504	0	0	0	0.2644	3.5689	0	0	0	0	0	0	0	0	0	0	0	0	0	0	0	0	0	0	0	0	0	0	0	0	0	0	0	0	0	0	0	0
RPS_01	1.3	2.14	1.32	5.06	2.72	4467.203125	20733.605	94.0106	0.9885	2.4691	1.2598	0	0	0	0	0	1.2719	0	0	0	0	0	0	0	0	0	0	0	0	0	0	0	0	0	0	0	0	0	0	0	0	0	0	0	0	0	0	0	0
RPS_01	5.42	6.77	23.05	19.24	1.56	4468.290771	20726.79	60.1103	1.8833	25.5009	0	0	6.4065	5.8773	0	0	0	0	0	0	0	0	0	0.2218	0	0	0	0	0	0	0	0	0	0	0	0	0	0	0	0	0	0	0	0	0	0	0	0	0
RPS_01	3.46	3.99	9.4	12.44	1.33	4570.602051	20726.79	71.8617	0.8199	7.6858	8.058	0.9652	0	0.1131	0	1.4222	8.6938	0	0.3803	0	0	0	0	0	0	0	0	0	0	0	0	0	0	0	0	0	0	0	0	0	0	0	0	0	0	0	0	0	0
RPS_01	7.1	10.36	39.59	45	2.13	4504.980713	20723.165	64.124	0	9.6523	11.33	0.5335	0.7264	1.2403	0	0.9895	10.8613	0	0.368	0.1748	0	0	0	0	0	0	0	0	0	0	0	0	0	0	0	0	0	0	0	0	0	0	0	0	0	0	0	0	0
RPS_01	5.3	6.25	22.02	23.44	1.39	4576.257813	20712.7975	57.0433	1.8242	24.7135	1.3647	0	1.9004	11.3213	0	0.2326	1.3416	0	0	0	0	0	0	0.2584	0	0	0	0	0	0	0	0	0	0	0	0	0	0	0	0	0	0	0	0	0	0	0	0	0
RPS_01	4.81	5.42	18.15	15.92	1.27	4460.097168	20700.545	60.6948	0	5.4062	15.4891	1.0603	0.1044	0	0	0.7969	16.2434	0	0.2048	0	0	0	0	0	0	0	0	0	0	0	0	0	0	0	0	0	0	0	0	0	0	0	0	0	0	0	0	0	0
RPS_01	1.94	2.34	2.95	6.08	1.45	4525.936035	20695.615	90.3971	1.174	4.6252	1.9005	0.1429	0	0	0	0	1.7603	0	0	0	0	0	0	0	0	0	0	0	0	0	0	0	0	0	0	0	0	0	0	0	0	0	0	0	0	0	0	0	0
RPS_01	2.87	3.5	6.47	9.84	1.49	4564.80127	20691.41	84.9202	1.1808	6.4174	2.9859	0.5124	0	0	0	0.732	2.9513	0	0.3001	0	0	0	0	0	0	0	0	0	0	0	0	0	0	0	0	0	0	0	0	0	0	0	0	0	0	0	0	0	0
RPS_01	4.94	6.47	19.2	17.51	1.71	4458.356934	20664.0775	57.2511	2.4086	24.7754	0.4366	0.3497	2.6617	9.9802	0	0	0	0.1533	0	1.2178	0	0	0	0.7656	0	0	0	0	0	0	0	0	0	0	0	0	0	0	0	0	0	0	0	0	0	0	0	0	0
RPS_01	2.47	2.78	4.77	8.1	1.27	4523.615723	20663.28	81.1327	1.0393	5.6644	5.4735	0.5551	0	0	0	0.5537	5.5812	0	0	0	0	0	0	0	0	0	0	0	0	0	0	0	0	0	0	0	0	0	0	0	0	0	0	0	0	0	0	0	0
RPS_01	3.25	3.95	8.29	11.43	1.48	4474.599121	20657.045	83.3982	0.9517	3.4935	5.7814	0.2213	0	0	0	0.2054	5.9485	0	0	0	0	0	0	0	0	0	0	0	0	0	0	0	0	0	0	0	0	0	0	0	0	0	0	0	0	0	0	0	0
RPS_01	3.29	3.69	8.48	10.56	1.26	4404.764648	20761.445	72.9697	0.9516	6.8978	7.9939	1.0591	0	0	0	1.0569	8.7204	0	0.3507	0	0	0	0	0	0	0	0	0	0	0	0	0	0	0	0	0	0	0	0	0	0	0	0	0	0	0	0	0	0
RPS_01	5.84	7.04	26.75	20.11	1.46	4342.40625	20744.4075	61.5132	0	7.3388	13.3732	1.1232	0	0	0	1.5878	14.225	0.2375	0.6013	0	0	0	0	0	0	0	0	0	0	0	0	0	0	0	0	0	0	0	0	0	0	0	0	0	0	0	0	0	0
RPS_01	2.56	3.16	5.15	10.27	1.52	4432.318359	20746.075	81.9857	0.9714	5.3663	4.9557	0.4926	0	0	0	0.5225	5.5066	0	0.1993	0	0	0	0	0	0	0	0	0	0	0	0	0	0	0	0	0	0	0	0	0	0	0	0	0	0	0	0	0	0
RPS_01	2.93	3.21	6.76	10.13	1.2	4329.209473	20743.32	76.5335	0.5519	3.9098	8.9048	0.4149	0	0	0	0.6784	9.0066	0	0	0	0	0	0	0	0	0	0	0	0	0	0	0	0	0	0	0	0	0	0	0	0	0	0	0	0	0	0	0	0
RPS_01	2.05	2.93	3.31	7.38	2.04	4335.735352	20729.98	89.3535	1.1337	2.9259	3.1849	0.1111	0	0	0	0	3.2908	0	0	0	0	0	0	0	0	0	0	0	0	0	0	0	0	0	0	0	0	0	0	0	0	0	0	0	0	0	0	0	0
RPS_01	1.17	1.45	1.07	3.76	1.54	4331.819824	20730.0525	90.971	0.8213	3.0095	2.4435	0.1101	0	0	0	0	2.6446	0	0	0	0	0	0	0	0	0	0	0	0	0	0	0	0	0	0	0	0	0	0	0	0	0	0	0	0	0	0	0	0
RPS_01	2.07	2.25	3.35	6.51	1.18	4333.125	20728.675	80.5281	0	2.1773	8.2064	0.115	0	0	0	0	8.9732	0	0	0	0	0	0	0	0	0	0	0	0	0	0	0	0	0	0	0	0	0	0	0	0	0	0	0	0	0	0	0	0
RPS_01	3.04	3.95	7.26	10.71	1.69	4331.529785	20724.18	83.8076	0.7446	5.2114	4.3095	0.4271	0	0	0	0.6555	4.6329	0	0.2113	0	0	0	0	0	0	0	0	0	0	0	0	0	0	0	0	0	0	0	0	0	0	0	0	0	0	0	0	0	0
RPS_01	1.8	2.21	2.53	5.79	1.52	4326.454102	20720.7725	87.012	1.3195	8.3477	0	0	0.1823	3.1384	0	0	0	0	0	0	0	0	0	0	0	0	0	0	0	0	0	0	0	0	0	0	0	0	0	0	0	0	0	0	0	0	0	0	0
RPS_01	2.69	3.16	5.67	8.97	1.38	4395.918457	20718.38	80.4995	1.0163	5.4513	5.7453	0.5734	0	0	0	0.5352	5.9742	0	0.2049	0	0	0	0	0	0	0	0	0	0	0	0	0	0	0	0	0	0	0	0	0	0	0	0	0	0	0	0	0	0
RPS_01	3.39	3.8	9	11.29	1.26	4305.42627	20699.385	75.022	0.9418	4.4152	8.9736	0.4258	0	0	0	0.5068	9.7148	0	0	0	0	0	0	0	0	0	0	0	0	0	0	0	0	0	0	0	0	0	0	0	0	0	0	0	0	0	0	0	0
RPS_01	2.1	3.41	3.48	6.8	2.62	4330.514648	20697.21	89.9122	1.6009	6.421	0.4983	0	0	0	0	0.8122	0.1633	0	0.5923	0	0	0	0	0	0	0	0	0	0	0	0	0	0	0	0	0	0	0	0	0	0	0	0	0	0	0	0	0	0
RPS_01	5.86	7.96	26.94	21.7	1.85	4327.03418	20691.7725	63.0186	0.7048	11.5769	8.6902	0.4524	1.5107	3.6142	0	0.2427	8.9241	0.7102	0	0	0	0	0	0.233	0.3221	0	0	0	0	0	0	0	0	0	0	0	0	0	0	0	0	0	0	0	0	0	0	0	0
RPS_01	4.09	4.49	13.13	13.75	1.21	4436.233887	20692.86	67.3786	0	5.8472	12.0046	0.889	0	0	0	1.0025	12.4731	0	0.4051	0	0	0	0	0	0	0	0	0	0	0	0	0	0	0	0	0	0	0	0	0	0	0	0	0	0	0	0	0	0
RPS_01	4.11	5.59	13.25	16.35	1.85	4395.338379	20689.525	58.7921	1.3691	23.8416	0.1334	0.2643	0.787	14.2949	0	0	0	0.1702	0	0	0	0	0	0.3474	0	0	0	0	0	0	0	0	0	0	0	0	0	0	0	0	0	0	0	0	0	0	0	0	0
RPS_01	1.8	2.07	2.53	6.08	1.33	4428.98291	20682.565	89.7988	0.9822	4.3547	2.2604	0.1335	0	0	0	0	2.4703	0	0	0	0	0	0	0	0	0	0	0	0	0	0	0	0	0	0	0	0	0	0	0	0	0	0	0	0	0	0	0	0
RPS_01	4.51	5.07	15.95	15.34	1.26	4437.974121	20675.315	64.4334	0.5448	8.3382	11.6016	1.018	0	0	0	1.3774	12.1546	0	0.532	0	0	0	0	0	0	0	0	0	0	0	0	0	0	0	0	0	0	0	0	0	0	0	0	0	0	0	0	0	0
RPS_01	2.77	3.34	6.01	9.4	1.46	4411.000488	20671.835	77.0085	0.7302	6.3246	6.8036	0.7848	0	0	0	0.8677	7.1681	0	0.3125	0	0	0	0	0	0	0	0	0	0	0	0	0	0	0	0	0	0	0	0	0	0	0	0	0	0	0	0	0	0
RPS_01	3.69	4.26	10.7	13.31	1.33	4419.266602	20666.18	73.775	0.8892	7.3269	7.0125	1.2186	0	0	0	1.3821	7.9239	0	0.4719	0	0	0	0	0	0	0	0	0	0	0	0	0	0	0	0	0	0	0	0	0	0	0	0	0	0	0	0	0	0
RPS_01	5.22	6.84	21.44	19.39	1.72	4320.65332	20662.1925	52.6645	1.8236	26.9805	1.3584	0.2352	5.8367	9.448	0	0	0	0.5342	0.6237	0	0	0	0	0.4952	0	0	0	0	0	0	0	0	0	0	0	0	0	0	0	0	0	0	0	0	0	0	0	0	0
RPS_01	3.98	5.12	12.44	13.17	1.65	4220.654785	20766.955	70.2055	2.0959	18.0113	0	0.1932	3.0051	5.3771	0	0	0	0.2625	0	0	0	0	0	0.8493	0	0	0	0	0	0	0	0	0	0	0	0	0	0	0	0	0	0	0	0	0	0	0	0	0
RPS_01	1.92	2.33	2.91	6.22	1.47	4251.108887	20749.41	86.9685	0.9237	4.0921	3.3742	0.4516	0	0	0	0.3597	3.8302	0	0	0	0	0	0	0	0	0	0	0	0	0	0	0	0	0	0	0	0	0	0	0	0	0	0	0	0	0	0	0	0
RPS_01	2.76	3.2	5.97	9.26	1.35	4176.278809	20746.075	81.055	0.9433	4.035	6.4109	0.3489	0	0	0	0.2792	6.9277	0	0	0	0	0	0	0	0	0	0	0	0	0	0	0	0	0	0	0	0	0	0	0	0	0	0	0	0	0	0	0	0
RPS_01	2.9	3.12	6.59	9.4	1.16	4277.9375	20741.87	80.0501	0	3.6782	7.6515	0.4293	0	0	0	0.1671	8.0239	0	0	0	0	0	0	0	0	0	0	0	0	0	0	0	0	0	0	0	0	0	0	0	0	0	0	0	0	0	0	0	0
RPS_01	6.67	9.39	34.98	30.67	1.98	4222.10498	20739.0425	46.7842	1.4621	27.6086	3.7131	0.9286	6.6518	7.158	0	0.2251	3.8905	0.2124	0	0.2128	0	0	0	0.9176	0.2351	0	0	0	0	0	0	0	0	0	0	0	0	0	0	0	0	0	0	0	0	0	0	0	0
RPS_01	3.5	3.77	9.61	11.29	1.16	4289.394043	20736.36	72.2279	0.8249	4.6328	10.5485	0.6304	0	0	0	0.4439	10.6916	0	0	0	0	0	0	0	0	0	0	0	0	0	0	0	0	0	0	0	0	0	0	0	0	0	0	0	0	0	0	0	0
RPS_01	2.3	2.53	4.14	7.23	1.21	4212.243652	20731.43	86.483	1.1799	3.9333	3.917	0.1872	0	0	0	0.1437	4.1559	0	0	0	0	0	0	0	0	0	0	0	0	0	0	0	0	0	0	0	0	0	0	0	0	0	0	0	0	0	0	0	0
RPS_01	2.29	2.67	4.1	7.38	1.36	4155.395996	20724.615	84.2244	1.1197	4.5841	4.1769	0.5488	0	0	0	0.5809	4.7654	0	0	0	0	0	0	0	0	0	0	0	0	0	0	0	0	0	0	0	0	0	0	0	0	0	0	0	0	0	0	0	0
RPS_01	4.04	4.83	12.83	13.46	1.43	4202.237305	20718.38	64.6838	1.8561	21.1239	0	0.2357	4.5804	6.8234	0	0	0	0	0	0	0	0	0	0.6969	0	0	0	0	0	0	0	0	0	0	0	0	0	0	0	0	0	0	0	0	0	0	0	0	0
RPS_01	4.21	5.19	13.94	14.18	1.52	4157.716309	20711.13	75.2209	0.8133	6.7734	7.5047	0.5663	0	0	0	0.8334	7.9225	0	0.3655	0	0	0	0	0	0	0	0	0	0	0	0	0	0	0	0	0	0	0	0	0	0	0	0	0	0	0	0	0	0
RPS_01	2.17	2.61	3.68	6.95	1.45	4172.65332	20710.84	82.7582	1.3363	10.609	0	0	0.7616	4.5349	0	0	0	0	0	0	0	0	0	0	0	0	0	0	0	0	0	0	0	0	0	0	0	0	0	0	0	0	0	0	0	0	0	0	0
RPS_01	4.95	5.79	19.24	17.8	1.37	4171.058105	20704.6775	69.1572	0	6.4013	9.8285	1.067	0	0	0	1.574	10.894	0.1672	0.6552	0	0	0	0	0.2556	0	0	0	0	0	0	0	0	0	0	0	0	0	0	0	0	0	0	0	0	0	0	0	0	0
RPS_01	4.58	6.08	16.45	16.78	1.77	4239.362305	20703.735	66.1009	0.7736	8.9782	10.1727	1.1078	0	0	0	1.5703	10.7717	0	0.5247	0	0	0	0	0	0	0	0	0	0	0	0	0	0	0	0	0	0	0	0	0	0	0	0	0	0	0	0	0	0
RPS_01	4.45	5.63	15.55	14.32	1.6	4283.230713	20702.2125	66.3593	2.0089	19.8154	0	0.6616	2.6273	7.2987	0	0	0	0.7345	0	0	0	0	0	0.4943	0	0	0	0	0	0	0	0	0	0	0	0	0	0	0	0	0	0	0	0	0	0	0	0	0
RPS_01	2.98	3.5	6.97	10.85	1.38	4162.066895	20702.14	86.1828	0.7827	2.7677	5.0239	0	0	0	0	0	5.2429	0	0	0	0	0	0	0	0	0	0	0	0	0	0	0	0	0	0	0	0	0	0	0	0	0	0	0	0	0	0	0	0
RPS_01	3.17	3.5	7.91	10.42	1.22	4191.21582	20689.96	81.0102	1.0019	5.0897	5.7377	0.459	0	0	0	0.6905	5.7943	0	0.2167	0	0	0	0	0	0	0	0	0	0	0	0	0	0	0	0	0	0	0	0	0	0	0	0	0	0	0	0	0	0
RPS_01	2.99	3.44	7.03	10.13	1.32	4232.981445	20673.72	77.831	0.7357	4.0435	7.9157	0.462	0	0	0	0.6202	8.1159	0	0.276	0	0	0	0	0	0	0	0	0	0	0	0	0	0	0	0	0	0	0	0	0	0	0	0	0	0	0	0	0	0
RPS_01	3.43	3.76	9.25	11.43	1.2	4193.246094	20671.545	79.6385	0.7176	5.5506	6.1141	0.4887	0	0	0	0.7368	6.4566	0	0.2971	0	0	0	0	0	0	0	0	0	0	0	0	0	0	0	0	0	0	0	0	0	0	0	0	0	0	0	0	0	0
RPS_01	2.86	3.52	6.43	9.12	1.51	4156.846191	20667.2675	66.1119	1.2797	19.182	0	0	1.2819	12.1445	0	0	0	0	0	0	0	0	0	0	0	0	0	0	0	0	0	0	0	0	0	0	0	0	0	0	0	0	0	0	0	0	0	0	0
RPS_01	4.13	4.67	13.4	13.75	1.28	4186.865234	20663.135	66.9103	0.7422	5.0695	12.051	0.8587	0	0	0	0.9442	13.2022	0	0.2219	0	0	0	0	0	0	0	0	0	0	0	0	0	0	0	0	0	0	0	0	0	0	0	0	0	0	0	0	0	0
RPS_01	4.66	5.97	17.06	16.49	1.64	4206.87793	20658.8575	71.4412	1.3251	13.8924	2.632	0.5777	2.482	3.8295	0	0	2.2203	0.5367	0	0	0	0	0	1.063	0	0	0	0	0	0	0	0	0	0	0	0	0	0	0	0	0	0	0	0	0	0	0	0	0
RPS_01	3.04	3.79	7.24	10.27	1.55	4105.429199	20767.245	83.0455	1.0339	3.0826	6.265	0.1911	0	0	0	0	6.3818	0	0	0	0	0	0	0	0	0	0	0	0	0	0	0	0	0	0	0	0	0	0	0	0	0	0	0	0	0	0	0	0
RPS_01	2.07	2.72	3.37	7.38	1.72	4053.657227	20760.865	84.6457	1.427	9.66	0	0	0.4098	3.5243	0	0	0	0	0	0	0	0	0	0.3333	0	0	0	0	0	0	0	0	0	0	0	0	0	0	0	0	0	0	0	0	0	0	0	0	0
RPS_01	2.88	3.52	6.51	10.13	1.5	4106.009277	20746.945	77.8295	0.8361	5.6155	7.0791	0.6846	0	0	0	0.472	7.4832	0	0	0	0	0	0	0	0	0	0	0	0	0	0	0	0	0	0	0	0	0	0	0	0	0	0	0	0	0	0	0	0
RPS_01	2.71	3.16	5.78	8.97	1.36	4144.439453	20744.625	86.6574	1.4804	6.7159	1.3721	0.6293	0.1357	0.1382	0	0.2785	1.9195	0	0.673	0	0	0	0	0	0	0	0	0	0	0	0	0	0	0	0	0	0	0	0	0	0	0	0	0	0	0	0	0	0
RPS_01	2.76	3.16	5.97	9.26	1.31	4018.852539	20735.2	80.2974	0.8759	4.3641	6.6381	0.4638	0	0	0	0.3808	6.98	0	0	0	0	0	0	0	0	0	0	0	0	0	0	0	0	0	0	0	0	0	0	0	0	0	0	0	0	0	0	0	0
RPS_01	3.26	3.55	8.33	10.42	1.19	4032.339355	20723.02	74.6576	0.6263	3.6219	10.0537	0.3583	0	0	0	0.2674	10.4147	0	0	0	0	0	0	0	0	0	0	0	0	0	0	0	0	0	0	0	0	0	0	0	0	0	0	0	0	0	0	0	0
RPS_01	3.47	4.14	9.48	11.14	1.42	4031.759277	20710.695	78.2337	0.716	6.6159	5.7096	0.8294	0	0	0	1.0071	6.4396	0	0.4486	0	0	0	0	0	0	0	0	0	0	0	0	0	0	0	0	0	0	0	0	0	0	0	0	0	0	0	0	0	0
RPS_01	3.59	4.12	10.13	11.86	1.31	4122.396484	20703.88	76.2091	0.5867	5.1647	8.0764	0.4514	0	0	0	0.879	8.0766	0.156	0.4002	0	0	0	0	0	0	0	0	0	0	0	0	0	0	0	0	0	0	0	0	0	0	0	0	0	0	0	0	0	0
RPS_01	2.58	2.98	5.21	8.1	1.34	4114.42041	20703.445	81.3204	1.4596	11.4635	0	0.4749	1.1325	2.3661	0	0.16	0.3699	0	0.7415	0	0	0	0	0.5116	0	0	0	0	0	0	0	0	0	0	0	0	0	0	0	0	0	0	0	0	0	0	0	0	0
RPS_01	3.69	4.39	10.72	12.44	1.41	4035.094727	20694.31	70.8914	0.792	3.8145	11.7809	0.4266	0	0	0	0.2391	12.0556	0	0	0	0	0	0	0	0	0	0	0	0	0	0	0	0	0	0	0	0	0	0	0	0	0	0	0	0	0	0	0	0
RPS_01	2.84	3.24	6.32	9.4	1.3	4114.855469	20692.135	80.4786	1.684	11.4561	0.2427	0.4017	1.8197	3.0748	0	0	0	0.3075	0.3027	0	0	0	0	0.2322	0	0	0	0	0	0	0	0	0	0	0	0	0	0	0	0	0	0	0	0	0	0	0	0	0
RPS_01	2.38	2.93	4.46	7.67	1.51	4088.316895	20684.015	81.0309	0.976	5.8441	4.7671	0.7578	0	0	0	0.8827	5.3569	0	0.3845	0	0	0	0	0	0	0	0	0	0	0	0	0	0	0	0	0	0	0	0	0	0	0	0	0	0	0	0	0	0
RPS_01	5.62	6.25	24.79	18.81	1.24	4112.970215	20678.505	53.8586	1.9484	28.0143	0.1164	0.3227	6.49	7.912	0	0	0	0.2567	0	0	0	0	0	1.081	0	0	0	0	0	0	0	0	0	0	0	0	0	0	0	0	0	0	0	0	0	0	0	0	0
RPS_01	3.19	3.9	7.98	11.58	1.49	4046.986328	20677.055	75.3687	1.4466	14.909	0	0.1809	3.246	4.0017	0	0	0	0	0	0.2589	0	0	0	0.5883	0	0	0	0	0	0	0	0	0	0	0	0	0	0	0	0	0	0	0	0	0	0	0	0	0
RPS_01	4.73	6.16	17.61	16.78	1.69	4123.121582	20670.82	66.1978	1.3874	19.2877	0	0	6.4698	6.1099	0	0	0	0	0	0	0	0	0	0.5475	0	0	0	0	0	0	0	0	0	0	0	0	0	0	0	0	0	0	0	0	0	0	0	0	0
RPS_01	1.61	1.97	2.03	5.06	1.5	4111.52002	20671.4	88.8314	1.1314	6.1577	0.4369	0.2167	0	0	0	1.8829	0	0	1.343	0	0	0	0	0	0	0	0	0	0	0	0	0	0	0	0	0	0	0	0	0	0	0	0	0	0	0	0	0	0
RPS_01	3.78	4.43	11.22	12.88	1.37	4036.689941	20669.515	70.1466	0.5944	5.7652	10.5948	0.6784	0	0	0	1.0197	10.8945	0	0.3064	0	0	0	0	0	0	0	0	0	0	0	0	0	0	0	0	0	0	0	0	0	0	0	0	0	0	0	0	0	0
RPS_01	4.55	5.57	16.27	17.22	1.5	4109.779785	20668.21	74.9746	0.7905	3.5214	9.6809	0.3313	0	0	0	0.3508	10.3504	0	0	0	0	0	0	0	0	0	0	0	0	0	0	0	0	0	0	0	0	0	0	0	0	0	0	0	0	0	0	0	0
RPS_01	4.31	5	14.59	14.9	1.34	4043.940918	20664.295	73.8472	1.1931	12.5805	2.9969	0.6235	1.3726	1.9261	0	0.4679	3.4068	0.2284	0.9265	0	0	0	0	0.4304	0	0	0	0	0	0	0	0	0	0	0	0	0	0	0	0	0	0	0	0	0	0	0	0	0
RPS_01	3.19	3.8	7.98	10.27	1.42	3949.598145	20765.07	77.3813	0.719	5.2143	7.1292	0.5691	0	0	0	0.9634	7.5994	0	0.4243	0	0	0	0	0	0	0	0	0	0	0	0	0	0	0	0	0	0	0	0	0	0	0	0	0	0	0	0	0	0
RPS_01	3.65	4.28	10.47	12.44	1.38	3896.666016	20760.9375	71.9732	0.741	6.7666	8.5687	1.0046	0	0.1447	0	0.9754	9.4335	0	0.3923	0	0	0	0	0	0	0	0	0	0	0	0	0	0	0	0	0	0	0	0	0	0	0	0	0	0	0	0	0	0
RPS_01	2.03	2.66	3.24	6.66	1.71	3867.227051	20761.59	89.1684	1.0094	4.8431	2.0898	0.2996	0	0	0	0.4126	2.1771	0	0	0	0	0	0	0	0	0	0	0	0	0	0	0	0	0	0	0	0	0	0	0	0	0	0	0	0	0	0	0	0
RPS_01	1.43	2.09	1.61	5.21	2.12	3994.119141	20758.7625	92.1635	1.2174	3.005	1.7734	0	0	0	0	0	1.8407	0	0	0	0	0	0	0	0	0	0	0	0	0	0	0	0	0	0	0	0	0	0	0	0	0	0	0	0	0	0	0	0
RPS_01	4.86	5.79	18.57	17.22	1.42	3875.058105	20754.92	59.8135	1.8572	22.4842	0.1149	0.1443	5.1592	8.434	0	0	0	1.6716	0	0	0	0	0	0.3211	0	0	0	0	0	0	0	0	0	0	0	0	0	0	0	0	0	0	0	0	0	0	0	0	0
RPS_01	5.36	6.17	22.55	18.38	1.33	3864.616699	20754.1225	49.6131	1.7693	29.0346	1.4256	0.6318	5.608	8.8159	0	0.272	1.7839	0.3034	0	0	0	0	0	0.7423	0	0	0	0	0	0	0	0	0	0	0	0	0	0	0	0	0	0	0	0	0	0	0	0	0
RPS_01	1.95	2.66	2.97	7.96	1.87	3910.87793	20749.845	91.2503	1.0226	5.3518	0.889	0.249	0	0	0	0.3839	0.6578	0	0.1956	0	0	0	0	0	0	0	0	0	0	0	0	0	0	0	0	0	0	0	0	0	0	0	0	0	0	0	0	0	0
RPS_01	4.05	5.02	12.85	12.88	1.54	3942.202148	20737.955	68.0395	0.8854	6.4319	10.872	0.7692	0	0	0	1.1965	11.3488	0	0.4566	0	0	0	0	0	0	0	0	0	0	0	0	0	0	0	0	0	0	0	0	0	0	0	0	0	0	0	0	0	0
RPS_01	7.91	11.82	49.11	30.96	2.24	3976.426758	20732.735	57.8004	1.6982	23.9846	0.9942	0.5386	3.7427	6.3075	0	0.3007	1.9338	0.52	0.4606	0.2152	0	0	0.6248	0.8789	0	0	0	0	0	0	0	0	0	0	0	0	0	0	0	0	0	0	0	0	0	0	0	0	0
RPS_01	3.21	3.52	8.1	10.56	1.2	3986.433105	20734.8375	76.4548	0.7362	6.7301	6.7988	0.8008	0	0	0	1.0538	7.0396	0	0.3859	0	0	0	0	0	0	0	0	0	0	0	0	0	0	0	0	0	0	0	0	0	0	0	0	0	0	0	0	0	0
RPS_01	6.16	8.96	29.79	24.02	2.12	3903.626953	20719.3225	65.0437	1.9397	22.0871	0	0.2409	1.5336	2.1116	0	0	0	0	7.0433	0	0	0	0	0	0	0	0	0	0	0	0	0	0	0	0	0	0	0	0	0	0	0	0	0	0	0	0	0	0
RPS_01	3.55	4.9	9.9	23.01	1.9	3987.158203	20714.03	87.7809	1.5083	6.08	1.7423	0.2806	0	0	0	0.5306	1.794	0	0.2832	0	0	0	0	0	0	0	0	0	0	0	0	0	0	0	0	0	0	0	0	0	0	0	0	0	0	0	0	0	0
RPS_01	2.89	3.26	6.55	9.69	1.28	3946.987793	20713.74	81.5995	0.6666	5.0136	5.4409	0.5274	0	0	0	0.8061	5.7147	0	0.2312	0	0	0	0	0	0	0	0	0	0	0	0	0	0	0	0	0	0	0	0	0	0	0	0	0	0	0	0	0	0
RPS_01	2.12	2.67	3.52	7.38	1.59	3976.571777	20711.855	86.9006	0.8965	3.2826	4.4209	0	0	0	0	0	4.4994	0	0	0	0	0	0	0	0	0	0	0	0	0	0	0	0	0	0	0	0	0	0	0	0	0	0	0	0	0	0	0	0
RPS_01	3.12	3.66	7.66	11	1.38	3977.876953	20709.245	81.0164	0.8011	2.5768	7.5224	0.1936	0	0	0	0	7.8896	0	0	0	0	0	0	0	0	0	0	0	0	0	0	0	0	0	0	0	0	0	0	0	0	0	0	0	0	0	0	0	0
RPS_01	6.77	9.59	36.03	24.45	2	3940.026855	20703.445	59.5451	0	14.6552	8.7261	0.6511	1.0388	4.707	0	0.8573	8.8626	0	0.5467	0	0	0	0	0.41	0	0	0	0	0	0	0	0	0	0	0	0	0	0	0	0	0	0	0	0	0	0	0	0	0
RPS_01	3.04	3.79	7.26	11.58	1.55	3984.112793	20672.995	79.5268	1.0463	4.8276	6.5973	0.5699	0	0	0	0.6265	6.64	0	0.1654	0	0	0	0	0	0	0	0	0	0	0	0	0	0	0	0	0	0	0	0	0	0	0	0	0	0	0	0	0	0
RPS_01	4.36	5.63	14.95	15.77	1.67	3932.630859	20668.935	66.0624	1.7787	19.3026	0	0	0.342	12.5143	0	0	0	0	0	0	0	0	0	0	0	0	0	0	0	0	0	0	0	0	0	0	0	0	0	0	0	0	0	0	0	0	0	0	0
RPS_01	3.58	4.09	10.07	12.88	1.31	3946.407715	20668.355	73.1709	0.6496	5.4085	9.2863	0.7752	0	0	0	0.6893	9.842	0	0.1781	0	0	0	0	0	0	0	0	0	0	0	0	0	0	0	0	0	0	0	0	0	0	0	0	0	0	0	0	0	0
RPS_01	3.4	4.21	9.09	11.58	1.53	3772.01416	20745.35	66.0232	1.7511	19.735	0	0.3837	2.2254	3.1233	0	0	0	0	6.1653	0	0	0	0	0.593	0	0	0	0	0	0	0	0	0	0	0	0	0	0	0	0	0	0	0	0	0	0	0	0	0
RPS_01	4	4.32	12.56	12.88	1.17	3736.919434	20743.755	69.0746	0	7.6548	9.5749	0.9516	0	0	0	1.4603	10.1922	0.2056	0.6615	0	0	0	0	0.2246	0	0	0	0	0	0	0	0	0	0	0	0	0	0	0	0	0	0	0	0	0	0	0	0	0
RPS_01	2.8	3.09	6.15	9.12	1.22	3805.513672	20743.61	79.9658	1.0013	4.1951	6.7685	0.3806	0	0	0	0.5202	6.9969	0	0.1716	0	0	0	0	0	0	0	0	0	0	0	0	0	0	0	0	0	0	0	0	0	0	0	0	0	0	0	0	0	0
RPS_01	4.85	5.31	18.51	15.34	1.2	3847.714355	20735.925	61.4937	0	6.9738	13.5662	0.855	0	0	0	1.0674	14.4727	0.158	1.4133	0	0	0	0	0	0	0	0	0	0	0	0	0	0	0	0	0	0	0	0	0	0	0	0	0	0	0	0	0	0
RPS_01	3.14	3.5	7.75	10.42	1.24	3719.082031	20733.605	78.1459	1.7048	14.0969	0	0	2.9123	2.8541	0	0	0	0	0	0	0	0	0	0.286	0	0	0	0	0	0	0	0	0	0	0	0	0	0	0	0	0	0	0	0	0	0	0	0	0
RPS_01	12.63	16.51	125.21	48.33	1.71	3719.51709	20720.6275	35.3506	2.5822	39.679	0.1237	0.7439	8.208	10.1218	0	0	0	1.7879	0	0	0	0	0	1.4029	0	0	0	0	0	0	0	0	0	0	0	0	0	0	0	0	0	0	0	0	0	0	0	0	0
RPS_01	4.52	5.31	16.01	16.06	1.38	3848.729492	20721.135	66.8826	0.6356	8.0204	9.8945	1.0587	0	0	0	1.2815	11.1384	0.2045	0.646	0	0	0	0	0.2378	0	0	0	0	0	0	0	0	0	0	0	0	0	0	0	0	0	0	0	0	0	0	0	0	0
RPS_01	2.48	2.7	4.84	7.67	1.19	3777.524902	20721.28	81.1029	0.8526	5.2908	5.4436	0.4951	0	0	0	0.6812	5.8423	0	0.2914	0	0	0	0	0	0	0	0	0	0	0	0	0	0	0	0	0	0	0	0	0	0	0	0	0	0	0	0	0	0
RPS_01	1.58	2.48	1.97	6.08	2.45	3777.379883	20699.675	93.7546	0.8922	2.9704	1.0919	0	0	0	0	0	1.291	0	0	0	0	0	0	0	0	0	0	0	0	0	0	0	0	0	0	0	0	0	0	0	0	0	0	0	0	0	0	0	0
RPS_01	3.22	3.97	8.12	12.88	1.53	3785.500977	20698.08	88.7427	1.5674	4.9675	2.0097	0.3126	0	0	0	0.3765	2.0236	0	0	0	0	0	0	0	0	0	0	0	0	0	0	0	0	0	0	0	0	0	0	0	0	0	0	0	0	0	0	0	0
RPS_01	6.44	7.67	32.62	24.89	1.42	3730.538574	20687.8575	46.3924	3.9142	30.5104	0	0.3393	6.639	8.4628	0	0	0	0.2151	0	2.0099	0	0	0	1.5169	0	0	0	0	0	0	0	0	0	0	0	0	0	0	0	0	0	0	0	0	0	0	0	0	0
RPS_01	4.13	4.85	13.42	13.75	1.38	3749.101074	20676.33	81.2031	1.3306	6.1711	4.5944	0.6461	0	0	0	0.8922	4.8887	0	0.2739	0	0	0	0	0	0	0	0	0	0	0	0	0	0	0	0	0	0	0	0	0	0	0	0	0	0	0	0	0	0
RPS_01	2.16	2.29	3.66	6.8	1.12	3768.388672	20675.17	88.6929	1.242	4.5208	2.5596	0.2056	0	0	0	0	2.7791	0	0	0	0	0	0	0	0	0	0	0	0	0	0	0	0	0	0	0	0	0	0	0	0	0	0	0	0	0	0	0	0
RPS_01	3.68	4.44	10.63	12.15	1.45	3838.578125	20672.85	68.1973	1.6131	18.3627	0	0.6473	2.7518	7.5604	0	0	0	0.2418	0	0	0	0	0	0.6256	0	0	0	0	0	0	0	0	0	0	0	0	0	0	0	0	0	0	0	0	0	0	0	0	0
RPS_01	3.39	4.54	9	11.29	1.8	3805.94873	20668.065	78.4993	0.7124	5.2167	7.162	0.5328	0	0	0	0.6932	7.1837	0	0	0	0	0	0	0	0	0	0	0	0	0	0	0	0	0	0	0	0	0	0	0	0	0	0	0	0	0	0	0	0
RPS_01	5.14	6.48	20.79	19.24	1.59	3817.405273	20660.5975	56.5315	1.8751	24.0746	0.5262	0.8871	3.9723	9.4618	0	0	0	1.4796	0.2424	0	0	0	0	0.9494	0	0	0	0	0	0	0	0	0	0	0	0	0	0	0	0	0	0	0	0	0	0	0	0	0
RPS_01	2.72	3.04	5.82	8.54	1.25	3577.75293	20758.98	81.2515	0.8732	3.496	7.0625	0.1847	0	0	0	0	7.1322	0	0	0	0	0	0	0	0	0	0	0	0	0	0	0	0	0	0	0	0	0	0	0	0	0	0	0	0	0	0	0	0
RPS_01	1.94	2.36	2.95	6.22	1.48	3687.967773	20747.815	88.1186	0.9811	4.7464	2.6844	0.3747	0	0	0	0.4095	2.6854	0	0	0	0	0	0	0	0	0	0	0	0	0	0	0	0	0	0	0	0	0	0	0	0	0	0	0	0	0	0	0	0
RPS_01	4.69	5.76	17.27	15.48	1.51	3561.800781	20743.6825	63.8557	0	6.2311	13.2189	0.4957	0.4047	0.9778	0	0.9051	13.1076	0.1741	0.3963	0	0	0	0	0	0.2329	0	0	0	0	0	0	0	0	0	0	0	0	0	0	0	0	0	0	0	0	0	0	0	0
RPS_01	2.4	2.67	4.52	7.67	1.24	3654.613281	20732.735	78.4818	0.7119	4.0441	7.3191	0.5127	0	0	0	1.0844	7.4416	0	0.4044	0	0	0	0	0	0	0	0	0	0	0	0	0	0	0	0	0	0	0	0	0	0	0	0	0	0	0	0	0	0
RPS_01	3.2	3.63	8.06	10.56	1.28	3694.058594	20730.415	74.4541	0.8592	7.2776	7.0474	0.8663	0	0	0	1.1521	7.8501	0	0.4931	0	0	0	0	0	0	0	0	0	0	0	0	0	0	0	0	0	0	0	0	0	0	0	0	0	0	0	0	0	0
RPS_01	1.95	2.34	2.99	6.51	1.43	3699.279297	20723.6	91.1505	1.2061	3.5931	1.8905	0	0	0	0	0	2.1597	0	0	0	0	0	0	0	0	0	0	0	0	0	0	0	0	0	0	0	0	0	0	0	0	0	0	0	0	0	0	0	0
RPS_01	5.87	7.69	27.05	21.56	1.72	3628.219727	20720.0475	48.6252	1.3492	30.2295	0.6078	0.8863	6.6904	8.8265	0	0	0.7694	0.2609	0.9426	0	0	0	0	0.8123	0	0	0	0	0	0	0	0	0	0	0	0	0	0	0	0	0	0	0	0	0	0	0	0	0
RPS_01	6.75	10.75	35.78	29.08	2.54	3682.457031	20717.7275	57.6924	1.7772	25.6903	0.1138	0.734	4.0152	7.5388	0	0	0	0.3656	0.3095	0.2689	0	0	0	1.4943	0	0	0	0	0	0	0	0	0	0	0	0	0	0	0	0	0	0	0	0	0	0	0	0	0
RPS_01	6.28	7.99	30.98	23.01	1.62	3653.888184	20686.6975	55.076	0	8.5911	16.1466	1.3946	0	0	0	1.2753	16.7665	0.219	0.5309	0	0	0	0	0	0	0	0	0	0	0	0	0	0	0	0	0	0	0	0	0	0	0	0	0	0	0	0	0	0
RPS_01	4.81	6.98	18.17	19.1	2.11	3572.822266	20685.8275	64.7384	1.6736	20.5439	0.8036	0.197	5.0464	5.207	0	0.1548	0.7581	0.1816	0.2215	0	0	0	0	0.474	0	0	0	0	0	0	0	0	0	0	0	0	0	0	0	0	0	0	0	0	0	0	0	0	0
RPS_01	2.84	4.52	6.34	9.4	2.53	3658.673828	20686.335	86.48	1.6806	8.1782	0.6012	0.4773	0	0	0	1.2203	0.4745	0.2491	0.6389	0	0	0	0	0	0	0	0	0	0	0	0	0	0	0	0	0	0	0	0	0	0	0	0	0	0	0	0	0	0
RPS_01	3.02	3.41	7.16	9.69	1.27	3598.925781	20680.245	75.1046	0.8418	4.8366	8.363	0.7499	0	0	0	0.9807	8.9018	0	0.2217	0	0	0	0	0	0	0	0	0	0	0	0	0	0	0	0	0	0	0	0	0	0	0	0	0	0	0	0	0	0
RPS_01	3.84	4.26	11.6	12.44	1.23	3685.212402	20675.17	72.1439	0.856	6.002	9.1336	0.7939	0	0	0	0.888	9.9076	0	0.2751	0	0	0	0	0	0	0	0	0	0	0	0	0	0	0	0	0	0	0	0	0	0	0	0	0	0	0	0	0	0
RPS_01	5.71	6.82	25.6	18.66	1.43	3640.401367	20663.6425	56.3878	2.0677	26.9091	0.4438	1.1348	3.1961	7.412	0	0	0.3128	0.2884	0.4026	0	0	0	0	1.4448	0	0	0	0	0	0	0	0	0	0	0	0	0	0	0	0	0	0	0	0	0	0	0	0	0
RPS_01	4.61	5	16.68	15.34	1.17	3646.927246	20659.365	58.7825	1.6859	20.8395	1.9969	0.3011	3.8372	7.631	0	0.3513	2.2163	0.3541	0.4358	0.2297	0	0	0	1.0719	0.2668	0	0	0	0	0	0	0	0	0	0	0	0	0	0	0	0	0	0	0	0	0	0	0	0
RPS_01	3.65	4.03	10.49	12.01	1.22	3677.526367	20658.785	74.505	0.6415	4.8746	9.1967	0.4183	0	0	0	0.5572	9.6247	0	0.1821	0	0	0	0	0	0	0	0	0	0	0	0	0	0	0	0	0	0	0	0	0	0	0	0	0	0	0	0	0	0
RPS_01	2.12	2.91	3.54	9.69	1.88	3645.187012	20873.255	90.1496	1.4181	5.941	0.4228	0.6939	0	0	0	0.5633	0.6283	0	0.1829	0	0	0	0	0	0	0	0	0	0	0	0	0	0	0	0	0	0	0	0	0	0	0	0	0	0	0	0	0	0
RPS_01	2.48	3.55	4.81	8.54	2.05	3650.697754	20870.355	90.6153	1.5238	3.1888	2.3294	0	0	0	0	0	2.3427	0	0	0	0	0	0	0	0	0	0	0	0	0	0	0	0	0	0	0	0	0	0	0	0	0	0	0	0	0	0	0	0
RPS_01	3.82	4.08	11.47	12.01	1.14	3670.855469	20863.975	66.4435	0.7113	5.228	12.5641	0.91	0	0	0	0.7799	13.1299	0	0.2334	0	0	0	0	0	0	0	0	0	0	0	0	0	0	0	0	0	0	0	0	0	0	0	0	0	0	0	0	0	0
RPS_01	3.94	5.83	12.16	23.58	2.2	3560.930664	20855.42	85.5208	0.7584	3.859	4.3983	0.2445	0	0	0	0.2219	4.9971	0	0	0	0	0	0	0	0	0	0	0	0	0	0	0	0	0	0	0	0	0	0	0	0	0	0	0	0	0	0	0	0
RPS_01	5.3	6.69	22.04	19.97	1.6	3638.226074	20852.0125	67.796	0.7808	5.3696	11.9801	0.7079	0	0	0	0.7243	12.2296	0	0.4116	0	0	0	0	0	0	0	0	0	0	0	0	0	0	0	0	0	0	0	0	0	0	0	0	0	0	0	0	0	0
RPS_01	5.49	6.14	23.7	18.09	1.25	3699.714355	20852.52	57.4853	0	8.561	14.0215	1.4803	0	0	0	2.0187	15.0842	0.2126	0.8411	0	0	0	0	0	0.2952	0	0	0	0	0	0	0	0	0	0	0	0	0	0	0	0	0	0	0	0	0	0	0	0
RPS_01	3.13	3.58	7.68	10.42	1.31	3624.884277	20847.59	75.9831	0.5575	5.9866	7.4287	0.7334	0	0	0	0.8428	8.0454	0	0.4224	0	0	0	0	0	0	0	0	0	0	0	0	0	0	0	0	0	0	0	0	0	0	0	0	0	0	0	0	0	0
RPS_01	4.9	5.79	18.84	15.92	1.4	3606.466797	20845.1975	62.8815	0.7069	7.7317	12.4455	1.1563	0	0	0	1.3892	13.2863	0	0.4026	0	0	0	0	0	0	0	0	0	0	0	0	0	0	0	0	0	0	0	0	0	0	0	0	0	0	0	0	0	0
RPS_01	4.31	5.65	14.61	14.76	1.72	3586.599121	20839.5425	65.5427	1.1213	11.6317	7.057	0.8218	1.7514	3.4844	0	0.4834	7.0059	0.2892	0.3111	0	0	0	0	0.5002	0	0	0	0	0	0	0	0	0	0	0	0	0	0	0	0	0	0	0	0	0	0	0	0	0
RPS_01	3.69	4.49	10.68	12.01	1.49	3573.837402	20833.815	74.9784	0.6916	5.7037	7.8912	0.8773	0	0	0	1.0068	8.4828	0	0.3682	0	0	0	0	0	0	0	0	0	0	0	0	0	0	0	0	0	0	0	0	0	0	0	0	0	0	0	0	0	0
RPS_01	2.82	3.17	6.24	9.4	1.27	3597.620605	20829.61	83.7037	1.0247	6.0114	3.6602	0.5928	0	0	0	0.8004	3.8779	0	0.329	0	0	0	0	0	0	0	0	0	0	0	0	0	0	0	0	0	0	0	0	0	0	0	0	0	0	0	0	0	0
RPS_01	6.28	7.85	30.96	22.14	1.56	3680.281738	20822.4325	55.7216	1.8229	25.1312	0	0.4652	6.0817	8.1246	0	0	0	1.5071	0.1649	0	0	0	0	0.9808	0	0	0	0	0	0	0	0	0	0	0	0	0	0	0	0	0	0	0	0	0	0	0	0	0
RPS_01	3.17	3.77	7.89	13.17	1.42	3613.717773	20823.81	72.8453	1.4947	15.8391	0	0.6565	2.9256	4.939	0	0	0	0.4103	0	0	0	0	0	0.8896	0	0	0	0	0	0	0	0	0	0	0	0	0	0	0	0	0	0	0	0	0	0	0	0	0
RPS_01	4.83	5.67	18.32	16.78	1.38	3622.563965	20815.11	57.7804	1.6426	24.1544	0	0.804	3.6219	9.3806	0	0	0	0.7116	0.2617	0	0	0	0	1.6429	0	0	0	0	0	0	0	0	0	0	0	0	0	0	0	0	0	0	0	0	0	0	0	0	0
RPS_01	3.33	3.48	8.69	10.56	1.1	3638.081055	20814.82	75.7749	0.7024	3.8223	8.7484	0.5077	0	0	0	0.8819	9.3752	0	0.1872	0	0	0	0	0	0	0	0	0	0	0	0	0	0	0	0	0	0	0	0	0	0	0	0	0	0	0	0	0	0
RPS_01	1.91	2.53	2.87	6.66	1.75	3677.671387	20811.34	90.936	0.7802	4.0808	1.6551	0.3643	0	0	0	0.3159	1.8677	0	0	0	0	0	0	0	0	0	0	0	0	0	0	0	0	0	0	0	0	0	0	0	0	0	0	0	0	0	0	0	0
RPS_01	4.34	5.28	14.78	14.9	1.48	3658.673828	20807.715	62.0888	1.1917	19.4533	2.2202	0.4235	1.0132	9.1807	0	0.6512	2.7828	0.2083	0.486	0	0	0	0	0.3003	0	0	0	0	0	0	0	0	0	0	0	0	0	0	0	0	0	0	0	0	0	0	0	0	0
RPS_01	5.66	6.45	25.18	19.24	1.3	3693.333496	20795.8975	53.655	0	8.1967	16.8521	1.4557	0	0	0	1.5077	17.6742	0.2387	0.4198	0	0	0	0	0	0	0	0	0	0	0	0	0	0	0	0	0	0	0	0	0	0	0	0	0	0	0	0	0	0
RPS_01	1.53	2.01	1.84	5.21	1.72	3589.644531	20789.6625	92.9516	1.1831	2.9582	1.3995	0	0	0	0	0	1.5076	0	0	0	0	0	0	0	0	0	0	0	0	0	0	0	0	0	0	0	0	0	0	0	0	0	0	0	0	0	0	0	0
RPS_01	1.83	2.75	2.64	8.39	2.24	3588.194336	20787.85	91.9042	1.1221	2.3114	2.2255	0	0	0	0	0	2.4367	0	0	0	0	0	0	0	0	0	0	0	0	0	0	0	0	0	0	0	0	0	0	0	0	0	0	0	0	0	0	0	0
RPS_01	2.45	3.39	4.73	8.97	1.9	3590.949707	20785.53	88.3697	1.2207	4.8991	2.5036	0.253	0	0	0	0.2457	2.5083	0	0	0	0	0	0	0	0	0	0	0	0	0	0	0	0	0	0	0	0	0	0	0	0	0	0	0	0	0	0	0	0
RPS_01	3.34	4.14	8.75	13.17	1.54	3649.537598	20993.33	77.1771	0.9494	6.818	6.5205	0.6762	0	0	0	0.9069	6.5552	0	0.3968	0	0	0	0	0	0	0	0	0	0	0	0	0	0	0	0	0	0	0	0	0	0	0	0	0	0	0	0	0	0
RPS_01	2.1	2.43	3.45	6.95	1.34	3694.783691	20984.92	85.6821	1.1785	6.5643	2.3126	0.6583	0	0	0	0.8738	2.4405	0	0.2899	0	0	0	0	0	0	0	0	0	0	0	0	0	0	0	0	0	0	0	0	0	0	0	0	0	0	0	0	0	0
RPS_01	3.74	4.28	10.99	12.88	1.31	3681.151855	20979.41	69.471	0	3.8081	12.4205	0.5626	0	0	0	0.2771	13.2229	0	0	0	0	0	0	0.2377	0	0	0	0	0	0	0	0	0	0	0	0	0	0	0	0	0	0	0	0	0	0	0	0	0
RPS_01	3.39	3.95	9.04	11	1.36	3576.737793	20974.19	74.4335	0.7259	4.5934	9.3593	0.5595	0	0	0	0.1962	10.1322	0	0	0	0	0	0	0	0	0	0	0	0	0	0	0	0	0	0	0	0	0	0	0	0	0	0	0	0	0	0	0	0
RPS_01	3.43	4.62	9.25	14.47	1.81	3630.540039	20970.71	79.1709	0.9164	4.837	6.9507	0.4271	0	0	0	0.5664	6.8906	0	0.2409	0	0	0	0	0	0	0	0	0	0	0	0	0	0	0	0	0	0	0	0	0	0	0	0	0	0	0	0	0	0
RPS_01	3.94	4.79	12.16	12.88	1.48	3671.435547	20962.735	69.1059	0.6492	6.7227	10.06	0.9816	0.1192	0	0	0.8627	11.1901	0	0.3086	0	0	0	0	0	0	0	0	0	0	0	0	0	0	0	0	0	0	0	0	0	0	0	0	0	0	0	0	0	0
RPS_01	2.75	2.98	5.92	8.83	1.18	3614.587891	20950.99	83.2318	0.9837	4.954	4.7345	0.4367	0	0	0	0.4543	5.0412	0	0.1639	0	0	0	0	0	0	0	0	0	0	0	0	0	0	0	0	0	0	0	0	0	0	0	0	0	0	0	0	0	0
RPS_01	5.84	6.19	26.82	20.84	1.12	3667.810059	20941.855	46.684	2.3255	31.1294	0.1062	0.6184	7.0277	9.9339	0	0	0	0.6503	0.1814	0	0	0	0	1.3432	0	0	0	0	0	0	0	0	0	0	0	0	0	0	0	0	0	0	0	0	0	0	0	0	0
RPS_01	2.5	2.84	4.9	8.1	1.3	3591.602295	20938.5925	91.6786	1.3907	3.1566	1.8696	0	0	0	0	0	1.9046	0	0	0	0	0	0	0	0	0	0	0	0	0	0	0	0	0	0	0	0	0	0	0	0	0	0	0	0	0	0	0	0
RPS_01	8.62	10.67	58.34	37.62	1.53	3584.278809	20928.95	54.2882	1.6951	26.5098	0.6803	0.3552	2.5007	11.5189	0	0.4029	0.5302	0.3524	0.3948	0	0	0	0	0.7715	0	0	0	0	0	0	0	0	0	0	0	0	0	0	0	0	0	0	0	0	0	0	0	0	0
RPS_01	3.58	4.24	10.07	13.17	1.4	3625.319336	20926.92	73.4572	1.0471	7.8465	7.0782	0.6488	0	0	0	1.36	7.4595	0	1.1028	0	0	0	0	0	0	0	0	0	0	0	0	0	0	0	0	0	0	0	0	0	0	0	0	0	0	0	0	0	0
RPS_01	2.84	3.16	6.32	9.26	1.24	3635.035645	20915.32	78.771	0.933	6.7259	5.7368	0.8244	0	0	0	0.7863	5.9851	0	0.2375	0	0	0	0	0	0	0	0	0	0	0	0	0	0	0	0	0	0	0	0	0	0	0	0	0	0	0	0	0	0
RPS_01	2.67	3.2	5.59	8.83	1.44	3690.578125	20896.18	79.5884	1.0053	6.0748	5.9182	0.7672	0	0	0	0.5149	6.1311	0	0	0	0	0	0	0	0	0	0	0	0	0	0	0	0	0	0	0	0	0	0	0	0	0	0	0	0	0	0	0	0
RPS_01	9.44	12.21	69.96	37.91	1.67	3653.453125	20890.815	45.6182	2.0045	29.4169	2.2843	0.4021	5.2189	9.4066	0	0.2931	2.7772	0.4069	0.3963	0.2821	0	0	0.2462	1.2468	0	0	0	0	0	0	0	0	0	0	0	0	0	0	0	0	0	0	0	0	0	0	0	0	0
RPS_01	2.97	3.44	6.95	9.98	1.34	3699.569336	20889.655	79.6828	1.9932	13.1921	0	0.2646	1.2397	2.6199	0	0	0	0	0	0	0	0	0	1.0076	0	0	0	0	0	0	0	0	0	0	0	0	0	0	0	0	0	0	0	0	0	0	0	0	0
RPS_01	2.69	3.97	5.67	10.27	2.19	3582.538574	21111.81	92.0161	1.5866	3.4652	1.4113	0	0	0	0	0	1.5208	0	0	0	0	0	0	0	0	0	0	0	0	0	0	0	0	0	0	0	0	0	0	0	0	0	0	0	0	0	0	0	0
RPS_01	4.81	5.76	18.19	18.38	1.43	3639.38623	21110.94	64.3364	0.891	9.9038	9.2354	0.8851	0.9908	1.9549	0	0.9355	9.4041	0.3706	0.5274	0	0	0	0	0.3451	0.22	0	0	0	0	0	0	0	0	0	0	0	0	0	0	0	0	0	0	0	0	0	0	0	0
RPS_01	1.69	2.07	2.24	5.64	1.5	3579.348145	21110.94	92.4635	0.893	2.9302	1.7772	0	0	0	0	0	1.936	0	0	0	0	0	0	0	0	0	0	0	0	0	0	0	0	0	0	0	0	0	0	0	0	0	0	0	0	0	0	0	0
RPS_01	3.14	4.4	7.75	16.64	1.96	3577.75293	21104.27	82.9903	1.2114	6.3008	3.8775	0.5376	0	0	0	0.9415	3.6969	0	0.4443	0	0	0	0	0	0	0	0	0	0	0	0	0	0	0	0	0	0	0	0	0	0	0	0	0	0	0	0	0	0
RPS_01	5.34	6.32	22.38	19.39	1.4	3671.435547	21097.0925	62.6989	0	7.2746	13.2383	1.3808	0	0	0	1.2176	13.8822	0	0.3077	0	0	0	0	0	0	0	0	0	0	0	0	0	0	0	0	0	0	0	0	0	0	0	0	0	0	0	0	0	0
RPS_01	1.97	2.17	3.04	6.08	1.22	3601.536133	21078.605	90.182	1.3457	6.7536	0	0.1395	0.5926	0.9867	0	0	0	0	0	0	0	0	0	0	0	0	0	0	0	0	0	0	0	0	0	0	0	0	0	0	0	0	0	0	0	0	0	0	0
RPS_01	5.88	8.67	27.17	22.43	2.17	3645.332031	21072.0075	58.8688	1.8204	24.9337	0.2457	0.1849	6.1752	6.3406	0	0	0	0.8813	0	0	0	0	0	0.5493	0	0	0	0	0	0	0	0	0	0	0	0	0	0	0	0	0	0	0	0	0	0	0	0	0
RPS_01	4.24	5.57	14.15	13.89	1.72	3678.251465	21072.8775	72.8154	0.8034	6.1673	8.9187	0.8461	0	0	0	0.642	9.6072	0	0.1998	0	0	0	0	0	0	0	0	0	0	0	0	0	0	0	0	0	0	0	0	0	0	0	0	0	0	0	0	0	0
RPS_01	6	7.99	28.3	25.75	1.77	3592.97998	21069.8325	64.6984	0.997	11.3419	8.3945	1.167	0	2.0211	0	1.2713	9.3373	0.2047	0.5668	0	0	0	0	0	0	0	0	0	0	0	0	0	0	0	0	0	0	0	0	0	0	0	0	0	0	0	0	0	0
RPS_01	3.35	4.71	8.81	12.15	1.98	3641.416504	21065.265	76.3757	1.1036	7.4971	6.1813	0.7351	0.2981	0.5404	0	0.4366	6.8321	0	0	0	0	0	0	0	0	0	0	0	0	0	0	0	0	0	0	0	0	0	0	0	0	0	0	0	0	0	0	0	0
RPS_01	3.59	4.53	10.11	12.88	1.59	3576.592773	21046.705	75.9707	0.8013	5.2195	8.6565	0.4069	0	0	0	0.1751	8.7699	0	0	0	0	0	0	0	0	0	0	0	0	0	0	0	0	0	0	0	0	0	0	0	0	0	0	0	0	0	0	0	0
RPS_01	3.29	3.79	8.52	11.29	1.32	3563.105957	21040.325	75.9376	0.8328	5.4	8.1048	0.5466	0	0	0	0.4733	8.5331	0	0.1718	0	0	0	0	0	0	0	0	0	0	0	0	0	0	0	0	0	0	0	0	0	0	0	0	0	0	0	0	0	0
RPS_01	4.66	6.46	17.08	15.63	1.92	3600.811035	21036.7725	63.3744	1.6855	21.7306	0	0	1.0415	11.8528	0	0	0	0	0	0	0	0	0	0.3152	0	0	0	0	0	0	0	0	0	0	0	0	0	0	0	0	0	0	0	0	0	0	0	0	0
RPS_01	4.68	6.88	17.23	17.8	2.16	3642.141602	21025.535	58.8957	1.7526	22.6239	0.1383	0.6104	6.039	7.8139	0	0	0	1.5929	0	0	0	0	0	0.5334	0	0	0	0	0	0	0	0	0	0	0	0	0	0	0	0	0	0	0	0	0	0	0	0	0
RPS_01	9.5	12.63	70.91	34.15	1.77	3588.774414	21014.805	49.6366	1.7465	29.1201	0.6478	0.713	6.453	8.5558	0	0	0.7185	1.0335	0.3191	0	0	0	0	0.8438	0.2123	0	0	0	0	0	0	0	0	0	0	0	0	0	0	0	0	0	0	0	0	0	0	0	0
RPS_01	2.93	3.16	6.74	9.4	1.16	3661.28418	21015.095	79.7637	0.8702	5.8264	5.856	0.4123	0	0	0	0.559	6.4514	0	0.2608	0	0	0	0	0	0	0	0	0	0	0	0	0	0	0	0	0	0	0	0	0	0	0	0	0	0	0	0	0	0
RPS_01	3.41	4.26	9.13	11.86	1.56	3649.972656	21007.7	79.7604	1.0966	6.2772	5.5798	0.6458	0	0	0	0.7459	5.6122	0	0.282	0	0	0	0	0	0	0	0	0	0	0	0	0	0	0	0	0	0	0	0	0	0	0	0	0	0	0	0	0	0
RPS_01	2.59	2.93	5.25	8.54	1.28	3694.348633	21213.18	80.7687	1.1423	6.5982	5.1927	0.653	0	0	0	0.3861	5.259	0	0	0	0	0	0	0	0	0	0	0	0	0	0	0	0	0	0	0	0	0	0	0	0	0	0	0	0	0	0	0	0
RPS_01	4.19	4.6	13.8	13.75	1.2	3676.80127	21211.6575	66.0695	1.6621	20.1265	0.1074	0.494	4.0248	6.3728	0	0	0	0.2118	0.1738	0	0	0	0	0.7573	0	0	0	0	0	0	0	0	0	0	0	0	0	0	0	0	0	0	0	0	0	0	0	0	0
RPS_01	4.21	4.95	13.9	14.03	1.38	3570.211914	21208.105	64.1543	1.5419	10.23	9.8922	1.611	0	0	0	1.383	10.4964	0.2017	0.4894	0	0	0	0	0	0	0	0	0	0	0	0	0	0	0	0	0	0	0	0	0	0	0	0	0	0	0	0	0	0
RPS_01	3.54	4.58	9.82	15.05	1.67	3668.535156	21198.535	78.3483	0.7545	5.5346	6.5838	0.6726	0	0	0	0.7472	7.0817	0	0.2774	0	0	0	0	0	0	0	0	0	0	0	0	0	0	0	0	0	0	0	0	0	0	0	0	0	0	0	0	0	0
RPS_01	4.32	5.9	14.63	14.32	1.87	3579.058105	21189.0375	62.8407	1.8937	20.9102	1.2175	1.2588	0.1195	0.2337	0	5.9645	0.9919	0.4337	4.1357	0	0	0	0	0	0	0	0	0	0	0	0	0	0	0	0	0	0	0	0	0	0	0	0	0	0	0	0	0	0
RPS_01	10.05	12.31	79.3	38.78	1.5	3586.88916	21177.8	50.0927	2.0358	8.6596	17.7738	1.7725	0.5091	0.5124	0	0.2232	18.0029	0.4179	0	0	0	0	0	0	0	0	0	0	0	0	0	0	0	0	0	0	0	0	0	0	0	0	0	0	0	0	0	0	0
RPS_01	2.7	3.62	5.74	10.71	1.79	3627.494629	21170.695	87.9111	1.2887	5.1021	2.7255	0.2098	0	0	0	0.155	2.6078	0	0	0	0	0	0	0	0	0	0	0	0	0	0	0	0	0	0	0	0	0	0	0	0	0	0	0	0	0	0	0	0
RPS_01	5.46	7.07	23.43	18.95	1.68	3620.098633	21165.2575	62.576	1.8332	21.9163	0	0.1467	3.8355	7.4188	0	0	0	1.358	0	0	0	0	0	0.9154	0	0	0	0	0	0	0	0	0	0	0	0	0	0	0	0	0	0	0	0	0	0	0	0	0
RPS_01	2.93	3.26	6.76	9.69	1.24	3642.57666	21161.125	82.4925	1.2384	5.1526	4.9514	0.481	0	0	0	0.513	5.1711	0	0	0	0	0	0	0	0	0	0	0	0	0	0	0	0	0	0	0	0	0	0	0	0	0	0	0	0	0	0	0	0
RPS_01	4.69	6	17.25	16.2	1.64	3586.164063	21158.7325	73.0721	2.4771	16.976	0.136	0.1661	0	0.1304	0	0	0	0	7.0422	0	0	0	0	0	0	0	0	0	0	0	0	0	0	0	0	0	0	0	0	0	0	0	0	0	0	0	0	0	0
RPS_01	3.76	4.67	11.07	13.31	1.55	3667.22998	21149.96	77.7718	1.5666	14.3358	0.298	0.3606	1.6806	2.5969	0	0	0.2972	0.1697	0.4863	0	0	0	0	0.4364	0	0	0	0	0	0	0	0	0	0	0	0	0	0	0	0	0	0	0	0	0	0	0	0	0
RPS_01	5.49	6.14	23.68	19.53	1.25	3640.546387	21143.58	64.276	1.4296	18.892	1.4996	0.8031	3.3917	5.8054	0	0.2328	1.5056	0.5133	0.5015	0	0	0	0	0.929	0.2204	0	0	0	0	0	0	0	0	0	0	0	0	0	0	0	0	0	0	0	0	0	0	0	0
RPS_01	4.43	5.23	15.41	16.78	1.39	3622.854004	21130.965	68.947	0.8818	4.65	11.9454	0.7015	0	0	0	0.3036	12.3346	0	0	0	0	0	0	0	0.2361	0	0	0	0	0	0	0	0	0	0	0	0	0	0	0	0	0	0	0	0	0	0	0	0
RPS_01	4.79	5.31	18	15.63	1.23	3635.470703	21129.225	67.3854	0.9188	7.6176	10.8808	0.8834	0	0	0	0.8734	11.1193	0	0.3213	0	0	0	0	0	0	0	0	0	0	0	0	0	0	0	0	0	0	0	0	0	0	0	0	0	0	0	0	0	0
RPS_01	3.25	3.58	8.31	11.58	1.21	3669.260254	21123.86	83.3706	1.2179	5.9249	3.4681	0.7056	0	0	0	0.8766	4.0667	0	0.3697	0	0	0	0	0	0	0	0	0	0	0	0	0	0	0	0	0	0	0	0	0	0	0	0	0	0	0	0	0	0
RPS_01	4.18	4.65	13.73	14.76	1.24	3619.953613	21332.385	71.3395	0.9234	9.3186	6.4381	1.4503	0.6172	0.8994	0	0.8941	7.5175	0.2031	0.399	0	0	0	0	0	0	0	0	0	0	0	0	0	0	0	0	0	0	0	0	0	0	0	0	0	0	0	0	0	0
RPS_01	4.66	6.54	17.02	23.58	1.97	3597.910645	21327.0925	79.84	1.0386	5.3501	6.3137	0.2659	0	0	0	0.3958	6.5958	0	0.2001	0	0	0	0	0	0	0	0	0	0	0	0	0	0	0	0	0	0	0	0	0	0	0	0	0	0	0	0	0	0
RPS_01	4.24	5.34	14.09	16.06	1.59	3700.729492	21325.715	69.9194	0.8405	7.751	9.3427	1.0254	0	0	0	1.085	9.7444	0	0.2916	0	0	0	0	0	0	0	0	0	0	0	0	0	0	0	0	0	0	0	0	0	0	0	0	0	0	0	0	0	0
RPS_01	4.15	4.67	13.54	13.6	1.27	3676.366211	21313.245	67.236	1.425	5.4016	12.1389	0.8268	0	0	0	0.9089	11.8407	0	0.2221	0	0	0	0	0	0	0	0	0	0	0	0	0	0	0	0	0	0	0	0	0	0	0	0	0	0	0	0	0	0
RPS_01	5.2	6.69	21.27	17.51	1.65	3637.645996	21299.9775	60.5033	1.7666	22.7581	0.1076	0.6449	3.4365	7.9675	0	0	0.3646	0.2324	1.0966	0	0	0	0	1.1219	0	0	0	0	0	0	0	0	0	0	0	0	0	0	0	0	0	0	0	0	0	0	0	0	0
RPS_01	3.58	4	10.05	11.43	1.25	3564.121094	21299.3975	74.8607	1.0345	5.4144	8.454	0.5582	0	0	0	0.5897	8.7781	0	0.3103	0	0	0	0	0	0	0	0	0	0	0	0	0	0	0	0	0	0	0	0	0	0	0	0	0	0	0	0	0	0
RPS_01	2.66	3.44	5.55	9.26	1.67	3628.219727	21292.945	79.0424	1.4518	13.1479	0	0.6586	0.6711	1.6003	0	0	0	0	3.1764	0	0	0	0	0.2515	0	0	0	0	0	0	0	0	0	0	0	0	0	0	0	0	0	0	0	0	0	0	0	0	0
RPS_01	7.1	9.25	39.59	27.2	1.7	3610.599854	21280.9825	65.0052	1.7885	15.7187	4.1105	0.9597	0.8925	4.8375	0	0.2509	5.3358	0.3802	0.3892	0	0	0	0	0.3312	0	0	0	0	0	0	0	0	0	0	0	0	0	0	0	0	0	0	0	0	0	0	0	0	0
RPS_01	1.78	2.07	2.49	5.79	1.35	3595.082764	21269.9625	88.5567	0.8718	5.6871	1.4894	0.6459	0	0	0	0.8276	1.5902	0	0.3314	0	0	0	0	0	0	0	0	0	0	0	0	0	0	0	0	0	0	0	0	0	0	0	0	0	0	0	0	0	0
RPS_01	6.86	9.56	37.01	23.58	1.94	3680.281738	21261.915	58.7515	0.8651	14.7065	7.9484	0.3888	2.5972	4.6746	0	0.7243	7.5632	0.2437	0.7433	0	0	0	0	0.7932	0	0	0	0	0	0	0	0	0	0	0	0	0	0	0	0	0	0	0	0	0	0	0	0	0
RPS_01	2.96	4	6.89	10.27	1.83	3613.717773	21252.345	89.0567	1.2318	5.6547	1.5918	0.4311	0	0	0	0.3751	1.6588	0	0	0	0	0	0	0	0	0	0	0	0	0	0	0	0	0	0	0	0	0	0	0	0	0	0	0	0	0	0	0	0
RPS_01	3.35	3.63	8.81	11.43	1.17	3589.209473	21248.285	73.0096	0.9078	6.6451	8.5724	0.8182	0	0	0	0.762	9.0356	0	0.2494	0	0	0	0	0	0	0	0	0	0	0	0	0	0	0	0	0	0	0	0	0	0	0	0	0	0	0	0	0	0
RPS_01	2.51	2.91	4.96	8.83	1.34	3699.714355	21457.535	84.1762	0.9956	6.8647	2.9002	0.8348	0	0	0	0.7064	3.3039	0	0.2182	0	0	0	0	0	0	0	0	0	0	0	0	0	0	0	0	0	0	0	0	0	0	0	0	0	0	0	0	0	0
RPS_01	4.65	4.88	17	15.77	1.1	3632.715332	21454.78	51.4683	1.5943	29.8938	4.6184	3.4401	0.88	1.2207	0	6.4291	0.4552	0	0	0	0	0	0	0	0	0	0	0	0	0	0	0	0	0	0	0	0	0	0	0	0	0	0	0	0	0	0	0	0
RPS_01	4.43	5.91	15.43	14.76	1.78	3667.810059	21437.38	65.4903	1.8167	21.7816	0	0.527	3.6558	5.6159	0	0	0	0.2722	0	0	0	0	0	0.8405	0	0	0	0	0	0	0	0	0	0	0	0	0	0	0	0	0	0	0	0	0	0	0	0	0
RPS_01	5.5	6.19	23.72	18.95	1.27	3676.221191	21433.6825	67.715	0	8.0522	10.7648	1.0788	0	0	0	1.3825	10.5226	0	0.4842	0	0	0	0	0	0	0	0	0	0	0	0	0	0	0	0	0	0	0	0	0	0	0	0	0	0	0	0	0	0
RPS_01	3.28	4.51	8.46	11.29	1.89	3667.084961	21429.84	74.1573	1.7664	16.3308	0	0.3024	1.8571	4.6279	0	0	0	0	0.4447	0	0	0	0	0.5135	0	0	0	0	0	0	0	0	0	0	0	0	0	0	0	0	0	0	0	0	0	0	0	0	0
RPS_01	2.2	3.34	3.79	11.43	2.31	3697.829102	21401.565	89.3185	1.2042	6.2532	0.855	0.4993	0	0	0	0.8803	0.6105	0	0.379	0	0	0	0	0	0	0	0	0	0	0	0	0	0	0	0	0	0	0	0	0	0	0	0	0	0	0	0	0	0
RPS_01	3.13	3.52	7.68	9.98	1.27	3599.650879	21391.85	75.8617	0.9595	3.7802	9.0756	0.4388	0	0	0	0.2502	9.634	0	0	0	0	0	0	0	0	0	0	0	0	0	0	0	0	0	0	0	0	0	0	0	0	0	0	0	0	0	0	0	0
RPS_01	7.03	11.41	38.85	38.05	2.63	3626.334473	21387.7175	76.817	1.1146	6.0929	7.1101	0.646	0	0.117	0	0.2649	7.5894	0	0.248	0	0	0	0	0	0	0	0	0	0	0	0	0	0	0	0	0	0	0	0	0	0	0	0	0	0	0	0	0	0
RPS_01	2.07	2.53	3.35	7.38	1.5	3669.115234	21381.41	89.6564	1.3162	5.2512	1.6331	0.274	0	0	0	0.2989	1.5703	0	0	0	0	0	0	0	0	0	0	0	0	0	0	0	0	0	0	0	0	0	0	0	0	0	0	0	0	0	0	0	0
RPS_01	4.82	5.37	18.25	16.93	1.24	3646.347168	21375.61	55.9603	1.9971	27.1767	0	0.3223	6.0701	7.2456	0	0	0	0	0	0	0	0	0	1.2278	0	0	0	0	0	0	0	0	0	0	0	0	0	0	0	0	0	0	0	0	0	0	0	0	0
RPS_01	2.89	4.14	6.57	9.69	2.05	3707.480469	21449.705	80.9095	1.0866	3.7719	6.8299	0.3423	0	0	0	0.1388	6.921	0	0	0	0	0	0	0	0	0	0	0	0	0	0	0	0	0	0	0	0	0	0	0	0	0	0	0	0	0	0	0	0
RPS_01	5.47	7.38	23.49	24.45	1.82	3710.23584	21442.8175	65.4056	0.9828	14.0057	6.5882	1.042	1.4749	1.9514	0	1.0575	6.4616	0.3288	0.3414	0	0	0	0	0.3602	0	0	0	0	0	0	0	0	0	0	0	0	0	0	0	0	0	0	0	0	0	0	0	0	0
RPS_01	5.56	6.99	24.28	22.43	1.58	3736.049316	21439.0475	65.5341	1.7858	19.5648	0.5394	1.3873	0.6147	1.6159	0	0.1677	0.8278	0	7.6686	0	0	0	0	0.2939	0	0	0	0	0	0	0	0	0	0	0	0	0	0	0	0	0	0	0	0	0	0	0	0	0
RPS_01	7.21	9.23	40.78	25.32	1.64	3812.764648	21417.515	42.5141	1.7844	34.46	0.1168	0.3289	6.1061	12.8049	0	0	0	0.392	0	0.2291	0	0	0	1.2637	0	0	0	0	0	0	0	0	0	0	0	0	0	0	0	0	0	0	0	0	0	0	0	0	0
RPS_01	3.86	4.52	11.7	12.59	1.37	3772.884277	21409.25	66.3119	0.6817	6.5168	11.8483	1.0539	0	0	0	0.8168	12.7705	0	0	0	0	0	0	0	0	0	0	0	0	0	0	0	0	0	0	0	0	0	0	0	0	0	0	0	0	0	0	0	0
RPS_01	4.38	5.81	15.09	15.34	1.76	3743.010254	21399.39	59.28	2.0172	24.5263	0	0.1751	4.4737	7.9847	0	0	0	0.3437	0	0.2423	0	0	0	0.957	0	0	0	0	0	0	0	0	0	0	0	0	0	0	0	0	0	0	0	0	0	0	0	0	0
RPS_01	2.38	2.81	4.46	8.83	1.39	3774.479492	21388.95	83.1425	0.9005	4.9249	5.0432	0.4344	0	0	0	0.4211	5.1333	0	0	0	0	0	0	0	0	0	0	0	0	0	0	0	0	0	0	0	0	0	0	0	0	0	0	0	0	0	0	0	0
RPS_01	1.69	2.29	2.24	6.22	1.84	3769.693848	21386.63	92.8781	1.0936	3.646	1.2141	0.108	0	0	0	0	1.0602	0	0	0	0	0	0	0	0	0	0	0	0	0	0	0	0	0	0	0	0	0	0	0	0	0	0	0	0	0	0	0	0
RPS_01	3.61	4.14	10.24	11.72	1.32	3738.514648	21383.295	70.2284	0.7127	5.75	10.3814	0.7125	0	0	0	0.7549	11.0386	0	0.2065	0	0	0	0	0	0.215	0	0	0	0	0	0	0	0	0	0	0	0	0	0	0	0	0	0	0	0	0	0	0	0
RPS_01	4.41	5.13	15.26	14.9	1.35	3822.770996	21375.755	69.0096	0.5705	4.4426	12.212	0.5611	0	0	0	0.3484	12.8558	0	0	0	0	0	0	0	0	0	0	0	0	0	0	0	0	0	0	0	0	0	0	0	0	0	0	0	0	0	0	0	0
RPS_01	4.08	5	13.04	13.6	1.5	3736.049316	21371.405	69.0924	0	7.1268	10.317	0.9635	0	0	0	0.8705	11.1118	0.1577	0.3603	0	0	0	0	0	0	0	0	0	0	0	0	0	0	0	0	0	0	0	0	0	0	0	0	0	0	0	0	0	0
RPS_01	4.51	6.07	15.99	15.34	1.81	3775.20459	21367.9975	65.3813	0.5446	6.0273	12.3936	1.1154	0	0	0	1.0789	13.2361	0	0.2227	0	0	0	0	0	0	0	0	0	0	0	0	0	0	0	0	0	0	0	0	0	0	0	0	0	0	0	0	0	0
RPS_01	5.9	7.25	27.3	20.11	1.51	3752.871582	21364.2275	56.4391	2.1093	25.4156	0	0.4658	5.9197	8.076	0	0	0	0.2131	0.1638	0	0	0	0	1.1976	0	0	0	0	0	0	0	0	0	0	0	0	0	0	0	0	0	0	0	0	0	0	0	0	0
RPS_01	3.51	3.92	9.65	12.44	1.25	3762.007813	21361.255	75.6409	0.858	5.1493	8.2989	0.6329	0	0	0	0.5351	8.8849	0	0	0	0	0	0	0	0	0	0	0	0	0	0	0	0	0	0	0	0	0	0	0	0	0	0	0	0	0	0	0	0
RPS_01	5.97	7.6	27.97	20.69	1.62	3719.662109	21354.5125	43.4827	1.8196	31.6709	3.5357	0.2458	5.0581	13.8056	0	0	0	0	0	0	0	0	0	0.3816	0	0	0	0	0	0	0	0	0	0	0	0	0	0	0	0	0	0	0	0	0	0	0	0	0
RPS_01	4.83	5.52	18.36	16.06	1.3	3975.84668	21444.7025	60.8612	1.6137	22.087	0	0.846	3.1967	7.3946	0	0.1689	0.2137	0.5851	1.9071	0	0	0	0	1.126	0	0	0	0	0	0	0	0	0	0	0	0	0	0	0	0	0	0	0	0	0	0	0	0	0
RPS_01	2.86	3.57	6.43	9.69	1.56	3909.137695	21437.09	83.6086	1.1423	3.3657	5.7588	0.1141	0	0	0	0	6.0104	0	0	0	0	0	0	0	0	0	0	0	0	0	0	0	0	0	0	0	0	0	0	0	0	0	0	0	0	0	0	0	0
RPS_01	2.91	3.2	6.66	9.26	1.21	3973.526367	21435.495	75.1542	0	3.8264	9.7215	0.4805	0	0	0	0.4613	10.1636	0	0.1925	0	0	0	0	0	0	0	0	0	0	0	0	0	0	0	0	0	0	0	0	0	0	0	0	0	0	0	0	0	0
RPS_01	4.89	5.79	18.76	20.69	1.4	3981.212402	21431.5075	70.7224	0.8947	9.9947	7.1499	0.2691	1.0564	1.7368	0	0.2691	7.6091	0	0	0	0	0	0	0.2977	0	0	0	0	0	0	0	0	0	0	0	0	0	0	0	0	0	0	0	0	0	0	0	0	0
RPS_01	3.72	3.98	10.89	12.01	1.14	3942.347168	21432.16	64.372	1.935	20.5741	0.2368	1.4299	2.802	6.8108	0	0	0	0.4264	0.394	0	0	0	0	1.019	0	0	0	0	0	0	0	0	0	0	0	0	0	0	0	0	0	0	0	0	0	0	0	0	0
RPS_01	2.97	3.71	6.91	10.42	1.56	3905.584717	21431.2175	79.7484	0.6404	2.8282	8.1216	0.1297	0	0	0	0	8.5318	0	0	0	0	0	0	0	0	0	0	0	0	0	0	0	0	0	0	0	0	0	0	0	0	0	0	0	0	0	0	0	0
RPS_01	2.59	3.77	5.25	11.43	2.13	3910.87793	21425.055	90.8199	1.7135	5.4411	0.5401	0.2882	0	0	0	0.6121	0.3633	0	0.2217	0	0	0	0	0	0	0	0	0	0	0	0	0	0	0	0	0	0	0	0	0	0	0	0	0	0	0	0	0	0
RPS_01	1.92	2.18	2.89	6.51	1.29	3961.054688	21421.865	86.2197	0.9247	3.2488	4.3525	0.1993	0	0	0	0.4146	4.6404	0	0	0	0	0	0	0	0	0	0	0	0	0	0	0	0	0	0	0	0	0	0	0	0	0	0	0	0	0	0	0	0
RPS_01	2.51	2.78	4.94	8.1	1.23	3902.466797	21420.56	82.6406	0.9007	2.9769	6.2122	0.2408	0	0	0	0.3196	6.7092	0	0	0	0	0	0	0	0	0	0	0	0	0	0	0	0	0	0	0	0	0	0	0	0	0	0	0	0	0	0	0	0
RPS_01	2.11	2.25	3.5	6.8	1.13	3965.985352	21420.56	89.4053	1.186	3.0048	2.7645	0.2467	0	0	0	0.3568	3.0358	0	0	0	0	0	0	0	0	0	0	0	0	0	0	0	0	0	0	0	0	0	0	0	0	0	0	0	0	0	0	0	0
RPS_01	3.14	3.9	7.72	10.85	1.54	3877.378418	21414.615	78.9437	0.5388	5.6734	6.0707	0.867	0	0	0	0.8676	6.7793	0	0.2594	0	0	0	0	0	0	0	0	0	0	0	0	0	0	0	0	0	0	0	0	0	0	0	0	0	0	0	0	0	0
RPS_01	2.89	3.72	6.57	10.13	1.65	3960.32959	21413.165	83.3948	1.2875	10.3016	0	0.1392	1.7189	2.4792	0	0	0	0	0.378	0	0	0	0	0.3008	0	0	0	0	0	0	0	0	0	0	0	0	0	0	0	0	0	0	0	0	0	0	0	0	0
RPS_01	2.22	3.44	3.87	8.39	2.4	3856.640625	21410.7	93.7602	1.6948	2.995	0.7986	0	0	0	0	0	0.7513	0	0	0	0	0	0	0	0	0	0	0	0	0	0	0	0	0	0	0	0	0	0	0	0	0	0	0	0	0	0	0	0
RPS_01	3.63	4.2	10.32	12.59	1.34	3930.963135	21410.1925	70.507	0.6369	5.0906	9.98	0.8616	0	0	0	1.391	11.0518	0	0.4812	0	0	0	0	0	0	0	0	0	0	0	0	0	0	0	0	0	0	0	0	0	0	0	0	0	0	0	0	0	0
RPS_01	5.28	5.88	21.9	18.95	1.24	3865.631836	21399.68	63.178	0.8379	8.9382	11.4518	1.0769	0	0	0	1.417	12.256	0.27	0.5743	0	0	0	0	0	0	0	0	0	0	0	0	0	0	0	0	0	0	0	0	0	0	0	0	0	0	0	0	0	0
RPS_01	2.96	3.37	6.89	9.69	1.29	3967.290527	21398.085	79.5933	0.9801	4.2872	7.3347	0.2054	0	0	0	0	7.5994	0	0	0	0	0	0	0	0	0	0	0	0	0	0	0	0	0	0	0	0	0	0	0	0	0	0	0	0	0	0	0	0
RPS_01	2.97	3.24	6.91	9.69	1.19	3940.896973	21390.98	80.5899	0.6488	4.5316	6.5323	0.4043	0	0	0	0.2327	7.0603	0	0	0	0	0	0	0	0	0	0	0	0	0	0	0	0	0	0	0	0	0	0	0	0	0	0	0	0	0	0	0	0
RPS_01	2.49	2.75	4.86	8.1	1.22	3923.05957	21385.47	84.6576	1.084	6.2183	2.9104	0.4271	0.2866	0.318	0	0.5664	3.2168	0	0.3148	0	0	0	0	0	0	0	0	0	0	0	0	0	0	0	0	0	0	0	0	0	0	0	0	0	0	0	0	0	0
RPS_01	3.5	4.22	9.63	11.86	1.45	3859.105957	21374.885	74.6326	0.9095	4.129	8.9425	0.6415	0	0	0	0.9437	9.5472	0	0.254	0	0	0	0	0	0	0	0	0	0	0	0	0	0	0	0	0	0	0	0	0	0	0	0	0	0	0	0	0	0
RPS_01	3.28	3.72	8.46	11	1.29	3936.546387	21350.96	82.5279	0.7482	6.1403	4.3295	0.4464	0	0	0	0.9136	4.5286	0	0.3655	0	0	0	0	0	0	0	0	0	0	0	0	0	0	0	0	0	0	0	0	0	0	0	0	0	0	0	0	0	0
RPS_01	2.21	3.11	3.85	7.81	1.97	3926.10498	21347.625	88.6788	1.1817	4.1288	2.6156	0.243	0	0	0	0.335	2.8171	0	0	0	0	0	0	0	0	0	0	0	0	0	0	0	0	0	0	0	0	0	0	0	0	0	0	0	0	0	0	0	0
RPS_01	5.99	7.5	28.14	21.12	1.57	4080.703369	21452.3875	57.0146	2.3347	27.0086	0.1698	0.525	4.1088	6.9861	0	0	0	0.2874	0	0.1959	0	0	0	1.3691	0	0	0	0	0	0	0	0	0	0	0	0	0	0	0	0	0	0	0	0	0	0	0	0	0
RPS_01	3.19	3.75	7.98	12.15	1.39	4064.678711	21450.14	82.1563	0.8067	6.1687	4.4043	0.6731	0	0	0	0.833	4.6561	0	0.3019	0	0	0	0	0	0	0	0	0	0	0	0	0	0	0	0	0	0	0	0	0	0	0	0	0	0	0	0	0	0
RPS_01	3.55	4.17	9.9	11	1.38	4119.206055	21449.6325	72.3188	0.7519	6.9466	7.8201	1.4028	0	0	0	1.2399	9.1236	0	0.3963	0	0	0	0	0	0	0	0	0	0	0	0	0	0	0	0	0	0	0	0	0	0	0	0	0	0	0	0	0	0
RPS_01	4.39	4.77	15.11	14.61	1.18	4030.091553	21443.615	59.2976	1.8692	24.5431	0	0.2707	4.1427	6.9913	0	0	0	0.2219	0	0	0	0	0	2.4136	0.2498	0	0	0	0	0	0	0	0	0	0	0	0	0	0	0	0	0	0	0	0	0	0	0	0
RPS_01	6.88	9.81	37.22	28.21	2.03	4110.359863	21423.5325	55.0876	1.5787	26.8974	0.1069	1.0664	5.5367	7.7707	0	0.157	0	0.6632	0	0	0	0	0	1.1354	0	0	0	0	0	0	0	0	0	0	0	0	0	0	0	0	0	0	0	0	0	0	0	0	0
RPS_01	3.57	3.83	9.99	12.59	1.15	4006.815918	21424.185	74.0524	0.5833	4.1975	9.5071	0.4663	0	0	0	0.5315	10.2058	0	0.2349	0	0	0	0	0	0.2212	0	0	0	0	0	0	0	0	0	0	0	0	0	0	0	0	0	0	0	0	0	0	0	0
RPS_01	2.49	3.2	4.86	8.54	1.66	4094.552734	21414.47	84.4558	1.023	5.0222	4.0233	0.3326	0	0	0	1.0327	3.7043	0	0.406	0	0	0	0	0	0	0	0	0	0	0	0	0	0	0	0	0	0	0	0	0	0	0	0	0	0	0	0	0	0
RPS_01	4.94	5.83	19.13	16.49	1.4	4033.644531	21409.9025	65.5158	1.7205	20.545	0.1758	1.0597	2.5787	6.618	0	0	0	0.3042	0.1985	0	0	0	0	1.2838	0	0	0	0	0	0	0	0	0	0	0	0	0	0	0	0	0	0	0	0	0	0	0	0	0
RPS_01	3.91	4.35	12.04	12.59	1.24	4013.486816	21409.25	71.8974	0.5264	4.2159	10.7304	0.4543	0	0	0	0.5978	11.3807	0	0.1972	0	0	0	0	0	0	0	0	0	0	0	0	0	0	0	0	0	0	0	0	0	0	0	0	0	0	0	0	0	0
RPS_01	4.43	4.69	15.43	15.63	1.12	4026.683594	21407.945	74.143	0.7277	4.4905	9.0977	0.336	0.4267	0.7485	0	0.5465	9.1709	0	0.3126	0	0	0	0	0	0	0	0	0	0	0	0	0	0	0	0	0	0	0	0	0	0	0	0	0	0	0	0	0	0
RPS_01	3.93	4.57	12.1	13.6	1.35	4066.999023	21391.995	71.6062	0.5075	4.7342	10.7318	0.5347	0	0	0	0.2649	11.6206	0	0	0	0	0	0	0	0	0	0	0	0	0	0	0	0	0	0	0	0	0	0	0	0	0	0	0	0	0	0	0	0
RPS_01	1.77	2.05	2.47	6.08	1.33	4032.484375	21392.285	91.9404	1.1721	5.6163	0	0	0	1.2711	0	0	0	0	0	0	0	0	0	0	0	0	0	0	0	0	0	0	0	0	0	0	0	0	0	0	0	0	0	0	0	0	0	0	0
RPS_01	4.06	4.63	12.94	14.03	1.3	4113.985352	21389.82	69.1123	1.3166	16.6068	2.1298	0.5286	3.2303	3.761	0	0.4654	2.009	0.1895	0.2092	0	0	0	0	0.4415	0	0	0	0	0	0	0	0	0	0	0	0	0	0	0	0	0	0	0	0	0	0	0	0	0
RPS_01	1.61	2.21	2.03	5.5	1.89	4129.502441	21386.775	92.5825	1.0046	4.5297	0.8009	0.1363	0	0	0	0.19	0.756	0	0	0	0	0	0	0	0	0	0	0	0	0	0	0	0	0	0	0	0	0	0	0	0	0	0	0	0	0	0	0	0
RPS_01	3.78	4.21	11.2	12.01	1.24	4010.586426	21381.12	68.6812	0	4.959	11.4991	0.7982	0	0	0	1.6689	11.8154	0	0.5781	0	0	0	0	0	0	0	0	0	0	0	0	0	0	0	0	0	0	0	0	0	0	0	0	0	0	0	0	0	0
RPS_01	4.86	5.79	18.57	16.2	1.42	4094.697754	21373.145	60.1422	1.5441	22.2925	0	0.29	1.3522	11.2028	0	0	0.8873	0	1.6064	0	0	0	0	0.441	0.2415	0	0	0	0	0	0	0	0	0	0	0	0	0	0	0	0	0	0	0	0	0	0	0	0
RPS_01	4.53	5.45	16.12	14.9	1.45	4097.308105	21367.345	63.8872	1.897	23.0968	0	0.1945	3.7824	4.8663	0	0	0	0	0	0	0	0	0	2.2758	0	0	0	0	0	0	0	0	0	0	0	0	0	0	0	0	0	0	0	0	0	0	0	0	0
RPS_01	4.45	5.98	15.53	23.58	1.81	4045.971191	21366.91	78.5317	1.0099	7.7971	5.0531	0.6337	0	0	0	1.089	5.3499	0	0.5356	0	0	0	0	0	0	0	0	0	0	0	0	0	0	0	0	0	0	0	0	0	0	0	0	0	0	0	0	0	0
RPS_01	6.05	6.96	28.74	23.01	1.32	4053.222168	21361.1825	56.0318	1.7094	24.5073	1.0833	0.6912	4.227	7.6222	0	0	1.4356	0.6819	0.1656	0.2087	0	0	0.2273	1.4087	0	0	0	0	0	0	0	0	0	0	0	0	0	0	0	0	0	0	0	0	0	0	0	0	0
RPS_01	4.13	5.59	13.4	14.47	1.83	4061.343262	21361.4	72.1979	1.4576	16.6372	0	0	0.274	9.4334	0	0	0	0	0	0	0	0	0	0	0	0	0	0	0	0	0	0	0	0	0	0	0	0	0	0	0	0	0	0	0	0	0	0	0
RPS_01	2.18	2.56	3.73	6.66	1.39	4138.928711	21348.64	73.7544	1.4587	15.9216	0	0.1891	3.2255	4.846	0	0	0	0	0	0	0	0	0	0.6046	0	0	0	0	0	0	0	0	0	0	0	0	0	0	0	0	0	0	0	0	0	0	0	0	0
RPS_01	5.76	7.27	26.02	20.55	1.59	4253.574219	21456.1575	61.0901	1.7352	19.9471	2.7161	1.1072	2.9301	5.4204	0	0.3014	3.253	0.4571	0	0	0	0	0	1.0423	0	0	0	0	0	0	0	0	0	0	0	0	0	0	0	0	0	0	0	0	0	0	0	0	0
RPS_01	2.18	2.4	3.73	6.95	1.21	4203.6875	21444.92	87.5805	0.8399	4.8338	3.0022	0.2826	0	0	0	0.3779	3.0831	0	0	0	0	0	0	0	0	0	0	0	0	0	0	0	0	0	0	0	0	0	0	0	0	0	0	0	0	0	0	0	0
RPS_01	3.3	3.81	8.54	11.58	1.33	4288.668945	21442.3825	75.7177	0.7928	3.5287	9.7229	0.3285	0	0	0	0	9.9094	0	0	0	0	0	0	0	0	0	0	0	0	0	0	0	0	0	0	0	0	0	0	0	0	0	0	0	0	0	0	0	0
RPS_01	3.1	3.66	7.56	10.13	1.39	4255.604492	21422.59	77.9966	1.0069	5.2072	6.7168	0.7509	0	0	0	0.8141	7.2062	0	0.3012	0	0	0	0	0	0	0	0	0	0	0	0	0	0	0	0	0	0	0	0	0	0	0	0	0	0	0	0	0	0
RPS_01	3.35	3.52	8.83	10.42	1.1	4210.213379	21418.675	70.3643	0.7026	4.9554	10.7278	0.8103	0	0	0	0.7633	11.3717	0	0.3047	0	0	0	0	0	0	0	0	0	0	0	0	0	0	0	0	0	0	0	0	0	0	0	0	0	0	0	0	0	0
RPS_01	2.82	3.02	6.24	8.54	1.15	4160.47168	21415.05	84.2265	1.2841	6.5279	3.3169	0.4702	0	0	0	0.7003	3.2525	0	0.2216	0	0	0	0	0	0	0	0	0	0	0	0	0	0	0	0	0	0	0	0	0	0	0	0	0	0	0	0	0	0
RPS_01	2.43	3.52	4.65	7.96	2.09	4292.584473	21414.905	87.3448	1.5774	8.0981	0	0.1987	0.814	1.4818	0	0	0	0	0	0	0	0	0	0.4852	0	0	0	0	0	0	0	0	0	0	0	0	0	0	0	0	0	0	0	0	0	0	0	0	0
RPS_01	2.79	3.26	6.13	9.4	1.36	4275.037109	21412.15	76.8551	1.3379	12.7723	0.7638	0	2.1057	5.4814	0	0	0	0.6838	0	0	0	0	0	0	0	0	0	0	0	0	0	0	0	0	0	0	0	0	0	0	0	0	0	0	0	0	0	0	0
RPS_01	6.42	9.34	32.41	25.18	2.11	4204.122559	21400.6225	72.8708	0.6498	5.3947	9.5157	0.5127	0	0	0	0.78	9.8546	0.1726	0.2491	0	0	0	0	0	0	0	0	0	0	0	0	0	0	0	0	0	0	0	0	0	0	0	0	0	0	0	0	0	0
RPS_01	1.88	2.36	2.78	6.22	1.56	4250.383789	21393.88	92.8457	1.2286	3.0833	1.3796	0	0	0	0	0	1.4627	0	0	0	0	0	0	0	0	0	0	0	0	0	0	0	0	0	0	0	0	0	0	0	0	0	0	0	0	0	0	0	0
RPS_01	2.47	2.89	4.77	7.81	1.38	4236.461914	21390.69	85.4266	1.5702	9.9724	0	0.1199	0.7534	0.9374	0	0	0	0	0.9372	0	0	0	0	0.2828	0	0	0	0	0	0	0	0	0	0	0	0	0	0	0	0	0	0	0	0	0	0	0	0	0
RPS_01	2.05	2.61	3.29	6.66	1.63	4249.658691	21386.63	89.696	1.0566	5.1177	1.9409	0.1699	0	0	0	0.1866	1.8324	0	0	0	0	0	0	0	0	0	0	0	0	0	0	0	0	0	0	0	0	0	0	0	0	0	0	0	0	0	0	0	0
RPS_01	2.66	3.39	5.55	8.68	1.62	4176.133789	21360.385	77.8511	1.5436	13.5655	0	0.1771	2.7598	3.5434	0	0	0	0.1668	0	0	0	0	0	0.3927	0	0	0	0	0	0	0	0	0	0	0	0	0	0	0	0	0	0	0	0	0	0	0	0	0
RPS_01	2.65	3.09	5.51	8.83	1.36	4185.705078	21358.645	83.8918	0.9955	5.1453	4.4109	0.4871	0	0	0	0.2182	4.8513	0	0	0	0	0	0	0	0	0	0	0	0	0	0	0	0	0	0	0	0	0	0	0	0	0	0	0	0	0	0	0	0
RPS_01	3.05	3.58	7.31	10.42	1.38	4270.541504	21349.8	86.4349	1.375	5.5241	3.0375	0.2296	0	0	0	0.3414	3.0575	0	0	0	0	0	0	0	0	0	0	0	0	0	0	0	0	0	0	0	0	0	0	0	0	0	0	0	0	0	0	0	0
RPS_01	5.09	5.9	20.35	16.93	1.34	4227.325684	21347.6975	58.9337	2.0198	25.5732	0.1142	0.2075	4.8917	7.472	0	0	0	0	0	0	0	0	0	0.7879	0	0	0	0	0	0	0	0	0	0	0	0	0	0	0	0	0	0	0	0	0	0	0	0	0
RPS_01	3.68	4.24	10.61	12.15	1.33	4342.696289	21439.7	68.8039	0.7	7.2856	9.2544	1.4137	0	0	0	1.7501	10.2617	0	0.5306	0	0	0	0	0	0	0	0	0	0	0	0	0	0	0	0	0	0	0	0	0	0	0	0	0	0	0	0	0	0
RPS_01	2.74	3.34	5.9	8.97	1.48	4383.881836	21437.38	78.2731	0.815	6.7356	5.651	0.8338	0	0	0	1.1245	6.1438	0	0.4232	0	0	0	0	0	0	0	0	0	0	0	0	0	0	0	0	0	0	0	0	0	0	0	0	0	0	0	0	0	0
RPS_01	2.89	3.62	6.55	10.42	1.57	4376.48584	21430.565	74.7423	1.6172	14.8316	0.2836	0.5261	1.73	5.2131	0	0.1601	0.1817	0.2177	0	0	0	0	0	0.4967	0	0	0	0	0	0	0	0	0	0	0	0	0	0	0	0	0	0	0	0	0	0	0	0	0
RPS_01	1.76	2.29	2.43	5.5	1.69	4409.695313	21425.055	92.2928	1.0392	4.0407	1.2849	0	0	0	0	0	1.3424	0	0	0	0	0	0	0	0	0	0	0	0	0	0	0	0	0	0	0	0	0	0	0	0	0	0	0	0	0	0	0	0
RPS_01	4.31	5.57	14.57	14.76	1.67	4428.98291	21422.9525	70.145	2.0655	17.5554	0	0.4434	0.5469	1.0095	0	0	0	0	8.0184	0	0	0	0	0.216	0	0	0	0	0	0	0	0	0	0	0	0	0	0	0	0	0	0	0	0	0	0	0	0	0
RPS_01	4.48	4.73	15.76	14.47	1.11	4388.522461	21422.735	63.6594	0	7.8084	12.1575	1.3718	0	0	0	1.8813	12.4575	0	0.6642	0	0	0	0	0	0	0	0	0	0	0	0	0	0	0	0	0	0	0	0	0	0	0	0	0	0	0	0	0	0
RPS_01	3.48	3.86	9.53	11	1.23	4358.503418	21418.53	69.3403	0.5835	3.3385	12.4371	0.4529	0	0	0	0.6717	13.176	0	0	0	0	0	0	0	0	0	0	0	0	0	0	0	0	0	0	0	0	0	0	0	0	0	0	0	0	0	0	0	0
RPS_01	5.54	6.96	24.07	19.1	1.58	4334.575195	21413.8175	55.9554	2.0729	27.709	0	1.7217	4.1808	4.3275	0	0	0	0.2327	0	0	0	0	0	3.4938	0.3062	0	0	0	0	0	0	0	0	0	0	0	0	0	0	0	0	0	0	0	0	0	0	0	0
RPS_01	3.5	4.14	9.61	11.86	1.4	4342.40625	21383.295	76.6641	1.744	13.0169	0.1412	0.5302	0.8438	1.956	1.2328	0	0.2092	0.1656	3.1276	0	0	0	0	0.3686	0	0	0	0	0	0	0	0	0	0	0	0	0	0	0	0	0	0	0	0	0	0	0	0	0
RPS_01	3.76	4.58	11.12	12.59	1.48	4403.024414	21376.915	61.6583	2.0761	21.6956	0	0.2722	2.1204	10.4925	0	0	0	0.1842	0	0.674	0	0	0	0.8267	0	0	0	0	0	0	0	0	0	0	0	0	0	0	0	0	0	0	0	0	0	0	0	0	0
RPS_01	1.48	1.94	1.72	4.63	1.72	4343.276367	21375.755	92.5259	0.9078	3.7114	1.0453	0.3976	0	0	0	0.3649	1.0472	0	0	0	0	0	0	0	0	0	0	0	0	0	0	0	0	0	0	0	0	0	0	0	0	0	0	0	0	0	0	0	0
RPS_01	4.94	7.14	19.2	28.36	2.09	4384.461914	21373.7975	60.21	1.5599	20.9891	0.9467	0.468	4.3857	7.3592	0	0.3697	0.4836	0.213	2.2479	0	0	0	0	0.7673	0	0	0	0	0	0	0	0	0	0	0	0	0	0	0	0	0	0	0	0	0	0	0	0	0
RPS_01	4.26	4.6	14.24	14.9	1.17	4308.906738	21366.62	63.9932	0.6621	8.5299	11.29	0.95	0.2397	0.3472	0	1.5732	11.456	0.2342	0.7246	0	0	0	0	0	0	0	0	0	0	0	0	0	0	0	0	0	0	0	0	0	0	0	0	0	0	0	0	0	0
RPS_01	3.17	3.62	7.87	10.42	1.31	4339.36084	21363.285	73.9518	0.5955	4.958	9.147	0.5879	0	0	0	0.5896	10.0089	0	0.1613	0	0	0	0	0	0	0	0	0	0	0	0	0	0	0	0	0	0	0	0	0	0	0	0	0	0	0	0	0	0
RPS_01	5.95	6.73	27.78	21.99	1.28	4361.403809	21360.6025	56.2114	0.5055	12.1875	10.792	1.1014	1.8079	3.6122	0	0.3614	12.1408	0.3846	0.3009	0	0	0	0	0.5944	0	0	0	0	0	0	0	0	0	0	0	0	0	0	0	0	0	0	0	0	0	0	0	0	0
RPS_01	3.82	4.24	11.45	13.02	1.23	4587.714355	21456.375	67.76	0	3.5361	13.0696	0.6439	0	0	0	0.5057	14.4848	0	0	0	0	0	0	0	0	0	0	0	0	0	0	0	0	0	0	0	0	0	0	0	0	0	0	0	0	0	0	0	0
RPS_01	2.05	2.26	3.29	6.51	1.23	4523.905762	21448.835	85.6237	1.2325	6.7328	2.1122	0.7198	0	0	0	0.8975	2.4005	0	0.281	0	0	0	0	0	0	0	0	0	0	0	0	0	0	0	0	0	0	0	0	0	0	0	0	0	0	0	0	0	0
RPS_01	4.82	6.09	18.25	15.92	1.59	4478.297119	21441.005	60.2555	0.5656	9.2189	13.161	1.1386	0	0.6246	0	0.9727	13.8325	0	0.2306	0	0	0	0	0	0	0	0	0	0	0	0	0	0	0	0	0	0	0	0	0	0	0	0	0	0	0	0	0	0
RPS_01	2.17	3.01	3.71	7.23	1.92	4534.057129	21438.975	90.2664	1.178	3.7576	2.3946	0.1508	0	0	0	0	2.2525	0	0	0	0	0	0	0	0	0	0	0	0	0	0	0	0	0	0	0	0	0	0	0	0	0	0	0	0	0	0	0	0
RPS_01	4.74	5.98	17.67	18.66	1.59	4493.016602	21432.9575	70.0856	0	7.3271	10.5108	0.759	0	0	0	0.5878	10.5571	0	0.1725	0	0	0	0	0	0	0	0	0	0	0	0	0	0	0	0	0	0	0	0	0	0	0	0	0	0	0	0	0	0
RPS_01	2.44	2.72	4.67	7.67	1.24	4551.822021	21415.9925	83.9024	0.9157	5.1551	4.1438	0.661	0	0	0	0.6564	4.398	0	0.1677	0	0	0	0	0	0	0	0	0	0	0	0	0	0	0	0	0	0	0	0	0	0	0	0	0	0	0	0	0	0
RPS_01	2.88	3.52	6.51	10.13	1.5	4496.49707	21409.395	78.0851	1.3673	10.1997	2.6731	0.38	1.3446	1.8418	0	0.3051	2.6303	0.1663	0.2009	0	0	0	0	0.8059	0	0	0	0	0	0	0	0	0	0	0	0	0	0	0	0	0	0	0	0	0	0	0	0	0
RPS_01	1.93	2.59	2.93	6.66	1.8	4552.32959	21405.19	91.896	1.1052	4.2876	1.0701	0.3299	0	0	0	0.3591	0.9521	0	0	0	0	0	0	0	0	0	0	0	0	0	0	0	0	0	0	0	0	0	0	0	0	0	0	0	0	0	0	0	0
RPS_01	7.67	10.64	46.22	27.2	1.92	4585.974121	21396.9975	50.5112	2.1209	29.6327	0.1165	0.4017	6.7478	8.2241	0	0	0	0.7625	0.2181	0.1915	0	0	0	1.073	0	0	0	0	0	0	0	0	0	0	0	0	0	0	0	0	0	0	0	0	0	0	0	0	0
RPS_01	5.11	6.36	20.52	17.36	1.55	4571.907227	21397.1425	61.4576	1.15	18.2457	3.4034	1.2387	2.1816	6.19	0	0	4.2601	0.4249	0.4198	0	0	0	0	1.0282	0	0	0	0	0	0	0	0	0	0	0	0	0	0	0	0	0	0	0	0	0	0	0	0	0
RPS_01	3.24	4.66	8.25	17.07	2.07	4552.909668	21396.925	87.9982	1.2254	3.2852	3.7158	0.1169	0	0	0	0	3.6584	0	0	0	0	0	0	0	0	0	0	0	0	0	0	0	0	0	0	0	0	0	0	0	0	0	0	0	0	0	0	0	0
RPS_01	4.16	4.51	13.59	13.31	1.17	4554.504883	21392.285	76.3914	1.1181	4.7799	7.9356	0.6089	0	0	0	0.4986	8.4436	0	0.2239	0	0	0	0	0	0	0	0	0	0	0	0	0	0	0	0	0	0	0	0	0	0	0	0	0	0	0	0	0	0
RPS_01	2.44	2.79	4.67	7.81	1.31	4484.025391	21370.39	82.5186	0.9636	4.4584	5.6675	0.3099	0	0	0	0.1602	5.9218	0	0	0	0	0	0	0	0	0	0	0	0	0	0	0	0	0	0	0	0	0	0	0	0	0	0	0	0	0	0	0	0
RPS_01	2.5	2.87	4.9	8.39	1.32	4535.217285	21367.78	80.924	1.1059	7.2631	4.3619	0.6013	0	0	0	0.8928	4.5809	0	0.2701	0	0	0	0	0	0	0	0	0	0	0	0	0	0	0	0	0	0	0	0	0	0	0	0	0	0	0	0	0	0
RPS_01	3.71	5.19	10.78	13.75	1.96	4461.257324	21357.775	62.7694	1.9967	22.4185	0	0.5801	3.6665	7.0481	0	0	0	0	0.2277	0	0	0	0	1.2929	0	0	0	0	0	0	0	0	0	0	0	0	0	0	0	0	0	0	0	0	0	0	0	0	0
RPS_01	2.3	2.64	4.17	7.38	1.31	4545.368652	21353.28	82.0472	1.0517	5.5696	5.4094	0.3261	0	0	0	0.3092	5.2867	0	0	0	0	0	0	0	0	0	0	0	0	0	0	0	0	0	0	0	0	0	0	0	0	0	0	0	0	0	0	0	0
RPS_01	2.26	2.7	4	7.38	1.44	4529.416504	21350.09	84.3957	1.0672	3.399	5.4409	0.116	0	0	0	0	5.5811	0	0	0	0	0	0	0	0	0	0	0	0	0	0	0	0	0	0	0	0	0	0	0	0	0	0	0	0	0	0	0	0
RPS_01	2.32	2.85	4.23	7.67	1.51	4526.081055	21350.09	74.1799	0	2.3196	11.216	0.196	0	0	0	0	12.0884	0	0	0	0	0	0	0	0	0	0	0	0	0	0	0	0	0	0	0	0	0	0	0	0	0	0	0	0	0	0	0	0
RPS_01	2.33	2.56	4.27	7.23	1.21	4525.355957	21347.625	81.6074	0.7817	2.5144	7.0887	0	0	0	0	0.1348	7.8731	0	0	0	0	0	0	0	0	0	0	0	0	0	0	0	0	0	0	0	0	0	0	0	0	0	0	0	0	0	0	0	0
RPS_01	3.34	3.69	8.77	11.29	1.22	4722.807617	21452.895	77.9524	0	2.7719	9.118	0.1993	0	0	0	0.255	9.7034	0	0	0	0	0	0	0	0	0	0	0	0	0	0	0	0	0	0	0	0	0	0	0	0	0	0	0	0	0	0	0	0
RPS_01	1.75	2.36	2.41	5.64	1.81	4690.178223	21452.315	90.9697	0.97	4.3699	1.5412	0.2623	0	0	0	0.3913	1.4956	0	0	0	0	0	0	0	0	0	0	0	0	0	0	0	0	0	0	0	0	0	0	0	0	0	0	0	0	0	0	0	0
RPS_01	2.56	2.9	5.15	8.83	1.28	4738.034668	21446.805	86.1545	1.2307	4.2317	3.8031	0.2225	0	0	0	0.3881	3.9693	0	0	0	0	0	0	0	0	0	0	0	0	0	0	0	0	0	0	0	0	0	0	0	0	0	0	0	0	0	0	0	0
RPS_01	5.1	6.41	20.45	17.8	1.58	4652.328125	21427.8825	55.7473	1.6095	23.8696	1.3882	0.4315	4.8066	8.2917	0	0.2862	1.2135	1.3909	0.2223	0	0	0	0	0.7426	0	0	0	0	0	0	0	0	0	0	0	0	0	0	0	0	0	0	0	0	0	0	0	0	0
RPS_01	5.24	6.25	21.54	19.68	1.42	4717.151855	21424.62	48.6006	1.5565	28.6179	0.5438	0.1986	1.1249	18.36	0	0	0.5052	0	0	0	0	0	0	0.4924	0	0	0	0	0	0	0	0	0	0	0	0	0	0	0	0	0	0	0	0	0	0	0	0	0
RPS_01	3.72	3.97	10.89	12.88	1.14	4697.719238	21413.455	66.0178	1.7247	19.0207	1.5967	0.4653	3.2074	4.368	0	0	2.1045	0.2597	0.2189	0	0	0	0	1.0163	0	0	0	0	0	0	0	0	0	0	0	0	0	0	0	0	0	0	0	0	0	0	0	0	0
RPS_01	4.25	5.83	14.21	15.19	1.88	4734.26416	21398.52	70.3105	2.0661	18.5331	0	0.1738	3.3601	4.4443	0	0	0	0.1791	0	0	0	0	0	0.9331	0	0	0	0	0	0	0	0	0	0	0	0	0	0	0	0	0	0	0	0	0	0	0	0	0
RPS_01	3.26	3.57	8.33	11	1.2	4686.552734	21395.33	74.4853	0.8672	3.9447	9.7577	0.4304	0	0	0	0.3676	10.1472	0	0	0	0	0	0	0	0	0	0	0	0	0	0	0	0	0	0	0	0	0	0	0	0	0	0	0	0	0	0	0	0
RPS_01	3.17	3.44	7.91	10.42	1.17	4639.276367	21391.85	73.0609	0.5257	4.7889	9.2598	0.7657	0	0	0	0.9078	10.4036	0	0.2876	0	0	0	0	0	0	0	0	0	0	0	0	0	0	0	0	0	0	0	0	0	0	0	0	0	0	0	0	0	0
RPS_01	3.77	4.09	11.18	12.15	1.18	4715.266602	21385.615	70.6141	0.9448	7.751	8.6953	1.068	0	0	0	1.2378	9.1763	0	0.5127	0	0	0	0	0	0	0	0	0	0	0	0	0	0	0	0	0	0	0	0	0	0	0	0	0	0	0	0	0	0
RPS_01	3.05	3.52	7.29	10.27	1.34	4734.699219	21374.305	79.2145	1.0068	4.4598	7.1477	0.4386	0	0	0	0.3437	7.3888	0	0	0	0	0	0	0	0	0	0	0	0	0	0	0	0	0	0	0	0	0	0	0	0	0	0	0	0	0	0	0	0
RPS_01	4.63	5.17	16.81	15.34	1.25	4680.171875	21365.17	59.1271	0	7.4477	13.6961	1.5532	0	0	0	1.8232	15.1594	0.2283	0.6952	0	0	0	0	0	0.2697	0	0	0	0	0	0	0	0	0	0	0	0	0	0	0	0	0	0	0	0	0	0	0	0
RPS_01	2.66	3.2	5.55	9.55	1.45	4695.108887	21366.185	87.8037	1.0672	4.1515	3.178	0.2027	0	0	0	0.1735	3.4233	0	0	0	0	0	0	0	0	0	0	0	0	0	0	0	0	0	0	0	0	0	0	0	0	0	0	0	0	0	0	0	0
RPS_01	3.33	3.83	8.69	10.56	1.33	4715.70166	21365.605	74.7469	0.6529	4.0714	9.8538	0.336	0	0	0	0.1449	10.194	0	0	0	0	0	0	0	0	0	0	0	0	0	0	0	0	0	0	0	0	0	0	0	0	0	0	0	0	0	0	0	0
RPS_01	2.92	3.5	6.7	9.4	1.43	4617.378418	21355.31	79.5576	0.5553	2.9233	7.5859	0.4305	0	0	0	0.7124	8.0173	0	0.2177	0	0	0	0	0	0	0	0	0	0	0	0	0	0	0	0	0	0	0	0	0	0	0	0	0	0	0	0	0	0
RPS_01	3.05	3.52	7.31	10.13	1.33	4707.725586	21354.875	80.548	0.8635	4.5541	6.1909	0.4511	0	0	0	0.6076	6.567	0	0.2178	0	0	0	0	0	0	0	0	0	0	0	0	0	0	0	0	0	0	0	0	0	0	0	0	0	0	0	0	0	0
RPS_01	1.96	2.53	3.01	6.66	1.66	4662.769531	21352.12	89.5229	0.8788	4.2149	2.3719	0.2949	0	0	0	0.3629	2.3536	0	0	0	0	0	0	0	0	0	0	0	0	0	0	0	0	0	0	0	0	0	0	0	0	0	0	0	0	0	0	0	0
RPS_01	4.04	5.16	12.83	15.48	1.63	4596.930664	21348.93	69.8354	1.4573	15.0973	1.4028	0.6774	2.3112	5.8875	0	0.345	1.4085	0.6667	0.1646	0	0	0	0	0.7465	0	0	0	0	0	0	0	0	0	0	0	0	0	0	0	0	0	0	0	0	0	0	0	0	0
RPS_01	1.88	2.21	2.76	6.22	1.39	4600.846191	21340.07	91.407	1.0659	4.3556	1.4895	0.1474	0	0	0	0	1.5346	0	0	0	0	0	0	0	0	0	0	0	0	0	0	0	0	0	0	0	0	0	0	0	0	0	0	0	0	0	0	0	0
RPS_01	3.27	3.69	8.37	10.42	1.28	4694.09375	21337.605	75.3796	0.857	4.95	8.3232	0.4663	0	0	0	0.804	8.5546	0.1755	0.4898	0	0	0	0	0	0	0	0	0	0	0	0	0	0	0	0	0	0	0	0	0	0	0	0	0	0	0	0	0	0
RPS_01	2.56	2.98	5.13	8.1	1.36	4677.851563	21330.5	82.1723	0.6003	4.5828	5.3297	0.4341	0	0	0	0.5036	5.8834	0	0.2787	0	0	0	0	0	0.2152	0	0	0	0	0	0	0	0	0	0	0	0	0	0	0	0	0	0	0	0	0	0	0	0
RPS_01	4.9	5.51	18.84	16.78	1.27	4642.176758	21305.705	59.41	1.3617	22.4091	0.4285	0.4448	3.9949	8.7412	0	0.1386	0.6256	0.3942	1.0265	0	0	0	0	1.025	0	0	0	0	0	0	0	0	0	0	0	0	0	0	0	0	0	0	0	0	0	0	0	0	0
RPS_01	1.83	2.29	2.64	6.22	1.56	4615.493164	21302.95	89.7634	0.9891	4.0478	2.3618	0.2169	0	0	0	0.199	2.422	0	0	0	0	0	0	0	0	0	0	0	0	0	0	0	0	0	0	0	0	0	0	0	0	0	0	0	0	0	0	0	0
RPS_01	7.4	9.01	42.96	26.33	1.48	4683.942383	21289.3925	48.3971	2.1461	29.4739	0	1.998	5.3784	9.0906	0	0	0	1.0614	0.1707	0.2027	0	0	0	2.0811	0	0	0	0	0	0	0	0	0	0	0	0	0	0	0	0	0	0	0	0	0	0	0	0	0
RPS_01	2.7	2.98	5.74	8.97	1.22	4647.107422	21256.26	81.9759	0.8924	4.7577	5.7003	0.3833	0	0	0	0.2793	6.0109	0	0	0	0	0	0	0	0	0	0	0	0	0	0	0	0	0	0	0	0	0	0	0	0	0	0	0	0	0	0	0	0
RPS_01	4.49	5.34	15.81	15.77	1.41	4690.468262	21251.185	65.1156	1.7242	19.7662	0.3829	1.1495	3.0242	6.387	0	0.3229	0.2632	0.5402	0.4283	0	0	0	0	0.8957	0	0	0	0	0	0	0	0	0	0	0	0	0	0	0	0	0	0	0	0	0	0	0	0	0
RPS_01	2.35	2.84	4.35	8.1	1.46	4662.624512	21250.46	87.8713	1.2209	4.9723	2.6426	0.2566	0	0	0	0.3935	2.6429	0	0	0	0	0	0	0	0	0	0	0	0	0	0	0	0	0	0	0	0	0	0	0	0	0	0	0	0	0	0	0	0
RPS_01	2.01	2.47	3.18	6.22	1.51	4651.022949	21244.515	87.1561	0.8957	5.6957	2.3746	0.485	0	0	0	0.6223	2.5469	0	0.2237	0	0	0	0	0	0	0	0	0	0	0	0	0	0	0	0	0	0	0	0	0	0	0	0	0	0	0	0	0	0
RPS_01	2.87	3.19	6.49	8.83	1.23	4656.82373	21241.18	81.7673	1.0992	6.3518	4.2241	0.7367	0	0	0	0.9643	4.4405	0	0.4161	0	0	0	0	0	0	0	0	0	0	0	0	0	0	0	0	0	0	0	0	0	0	0	0	0	0	0	0	0	0
RPS_01	3.65	4.28	10.45	12.59	1.38	4686.335205	21211.6575	80.0691	1.0733	6.3491	5.2514	0.4672	0	0	0	0.7968	5.6022	0	0.3909	0	0	0	0	0	0	0	0	0	0	0	0	0	0	0	0	0	0	0	0	0	0	0	0	0	0	0	0	0	0
RPS_01	4.9	5.89	18.86	16.49	1.45	4608.387207	21189.98	49.4917	1.9871	28.6292	0	0.1845	2.0889	16.5272	0	0	0	0.2466	0	0	0	0	0	0.8449	0	0	0	0	0	0	0	0	0	0	0	0	0	0	0	0	0	0	0	0	0	0	0	0	0
RPS_01	1.39	1.97	1.53	5.79	1.99	4614.260498	21185.34	93.482	0.9279	4.038	0.3479	0.3342	0	0	0	0.5144	0.1904	0	0.1652	0	0	0	0	0	0	0	0	0	0	0	0	0	0	0	0	0	0	0	0	0	0	0	0	0	0	0	0	0	0
RPS_01	4.18	5.12	13.75	15.19	1.49	4624.484375	21180.555	67.3968	1.8425	20.4686	0	0	4.8778	4.715	0	0	0	0	0	0.202	0	0	0	0.4973	0	0	0	0	0	0	0	0	0	0	0	0	0	0	0	0	0	0	0	0	0	0	0	0	0
RPS_01	4.72	5.8	17.52	16.64	1.51	4678.431641	21179.105	61.693	0.6295	5.6949	14.6972	0.9594	0	0	0	1.1869	15.139	0	0	0	0	0	0	0	0	0	0	0	0	0	0	0	0	0	0	0	0	0	0	0	0	0	0	0	0	0	0	0	0
RPS_01	4.94	5.62	19.13	16.78	1.3	4628.544922	21164.605	64.6335	0	6.8138	12.7442	0.8996	0	0	0	1.5008	12.8421	0	0.5661	0	0	0	0	0	0	0	0	0	0	0	0	0	0	0	0	0	0	0	0	0	0	0	0	0	0	0	0	0	0
RPS_01	3.96	4.74	12.31	14.03	1.43	4733.539063	21156.195	61.4294	1.8741	23.6896	0.1801	5.4916	0.3324	0.6768	0	0	0	0	5.9148	0	0	0	0.1931	0.218	0	0	0	0	0	0	0	0	0	0	0	0	0	0	0	0	0	0	0	0	0	0	0	0	0
RPS_01	2.02	2.59	3.2	6.66	1.64	4712.946289	21143.29	87.6603	1.0899	4.6864	2.5686	0.409	0	0	0	0.6891	2.6256	0	0.271	0	0	0	0	0	0	0	0	0	0	0	0	0	0	0	0	0	0	0	0	0	0	0	0	0	0	0	0	0	0
RPS_01	3.94	4.81	12.18	13.46	1.49	4628.254883	21134.445	75.5385	0.8053	5.8754	7.3447	0.6211	0	0	0	1.0241	8.4606	0	0.3302	0	0	0	0	0	0	0	0	0	0	0	0	0	0	0	0	0	0	0	0	0	0	0	0	0	0	0	0	0	0
RPS_01	5.7	7.42	25.5	23.87	1.7	4663.20459	21123.3525	64.4118	0	8.0537	10.7629	0.5811	1.5021	1.9932	0	0.5267	11.4094	0.2633	0.2414	0	0	0	0	0.2544	0	0	0	0	0	0	0	0	0	0	0	0	0	0	0	0	0	0	0	0	0	0	0	0	0
RPS_01	3.03	4.28	7.22	10.56	2	4727.738281	21123.135	84.2584	1.1881	5.6801	3.6953	0.5003	0	0	0	0.673	3.7503	0	0.2544	0	0	0	0	0	0	0	0	0	0	0	0	0	0	0	0	0	0	0	0	0	0	0	0	0	0	0	0	0	0
RPS_01	2.64	3.02	5.48	8.25	1.31	4694.528809	21098.035	80.0215	1.1058	6.2631	5.1217	0.7385	0	0	0	0.8036	5.6531	0	0.2927	0	0	0	0	0	0	0	0	0	0	0	0	0	0	0	0	0	0	0	0	0	0	0	0	0	0	0	0	0	0
RPS_01	5.68	6.43	25.31	23.58	1.28	4700.619629	21093.3225	59.3947	1.4296	20.105	2.802	0.7951	1.4658	9.7458	0	0.1388	3.2433	0.2837	0	0	0	0	0	0.5961	0	0	0	0	0	0	0	0	0	0	0	0	0	0	0	0	0	0	0	0	0	0	0	0	0
RPS_01	9.18	12.98	66.22	34.15	2	4686.407715	21084.695	36.6515	1.9057	37.3356	0.1623	0.2776	9.6202	11.0125	0	0	0	1.8678	0	0	0	0	0	1.1668	0	0	0	0	0	0	0	0	0	0	0	0	0	0	0	0	0	0	0	0	0	0	0	0	0
RPS_01	1.76	2.06	2.43	6.08	1.37	4652.473145	21080.055	92.1641	1.0256	4.0287	1.4157	0	0	0	0	0	1.366	0	0	0	0	0	0	0	0	0	0	0	0	0	0	0	0	0	0	0	0	0	0	0	0	0	0	0	0	0	0	0	0
RPS_01	4.01	4.43	12.62	13.6	1.22	4599.831055	21075.27	71.2789	0.8361	7.7295	8.3924	1.0264	0	0	0	1.2758	9.0238	0	0.4372	0	0	0	0	0	0	0	0	0	0	0	0	0	0	0	0	0	0	0	0	0	0	0	0	0	0	0	0	0	0
RPS_01	8.05	10.34	50.87	41.81	1.65	4703.665039	21070.485	55.4228	1.3128	23.28	4.6649	0.6218	3.9793	3.7886	0	0.4721	5.4224	0	0.2373	0	0	0	0	0.5785	0.2193	0	0	0	0	0	0	0	0	0	0	0	0	0	0	0	0	0	0	0	0	0	0	0	0
RPS_01	3.23	3.62	8.19	10.42	1.26	4618.103516	21072.805	77.0191	0.8355	5.5796	7.4301	0.4058	0	0	0	0.5087	8.0447	0	0.1765	0	0	0	0	0	0	0	0	0	0	0	0	0	0	0	0	0	0	0	0	0	0	0	0	0	0	0	0	0	0
RPS_01	2.05	2.56	3.31	6.95	1.56	4660.01416	21066.715	87.9838	1.0498	5.3966	2.0381	0.519	0	0	0	0.6159	2.1437	0	0.2531	0	0	0	0	0	0	0	0	0	0	0	0	0	0	0	0	0	0	0	0	0	0	0	0	0	0	0	0	0	0
RPS_01	5.29	6.66	21.96	18.38	1.59	4618.393555	21054.1725	55.7012	0	6.9087	16.5056	1.4289	0.1181	0.1333	0	0.9327	18.2716	0	0	0	0	0	0	0	0	0	0	0	0	0	0	0	0	0	0	0	0	0	0	0	0	0	0	0	0	0	0	0	0
RPS_01	3.24	3.97	8.27	11.29	1.5	4722.08252	21051.2	62.016	1.4255	22.3654	0	0.2129	0.6043	13.1341	0	0	0	0	0	0	0	0	0	0.2418	0	0	0	0	0	0	0	0	0	0	0	0	0	0	0	0	0	0	0	0	0	0	0	0	0
RPS_01	3.2	3.66	8.06	10.56	1.31	4608.532227	21048.2275	69.4468	1.1534	13.2554	4.1351	0.8995	2.1048	3.7881	0	0.4019	4.0206	0.3517	0	0	0	0	0	0.4427	0	0	0	0	0	0	0	0	0	0	0	0	0	0	0	0	0	0	0	0	0	0	0	0	0
RPS_01	2.58	3.5	5.21	11.86	1.85	4623.469238	21044.965	86.3438	0.8089	6.8769	1.9704	0.6178	0	0	0	1.1224	1.8304	0	0.4294	0	0	0	0	0	0	0	0	0	0	0	0	0	0	0	0	0	0	0	0	0	0	0	0	0	0	0	0	0	0
RPS_01	3.7	4.99	10.74	13.17	1.82	4620.713867	21041.8475	72.6528	0.5899	5.0634	9.9746	0.5381	0.1327	0	0	0.3054	10.7432	0	0	0	0	0	0	0	0	0	0	0	0	0	0	0	0	0	0	0	0	0	0	0	0	0	0	0	0	0	0	0	0
RPS_01	3.21	3.55	8.1	10.56	1.22	4641.814209	21042.5	79.7448	0.7087	4.8846	5.7523	0.7338	0	0	0	1.0611	6.5189	0.2172	0.3787	0	0	0	0	0	0	0	0	0	0	0	0	0	0	0	0	0	0	0	0	0	0	0	0	0	0	0	0	0	0
RPS_01	5.32	5.96	22.21	18.09	1.26	4604.036621	21032.2775	55.1204	0	6.8507	16.1014	1.2018	0.1043	0.4978	0	1.2329	17.6462	0.2221	0.5047	0	0	0	0.2512	0.2665	0	0	0	0	0	0	0	0	0	0	0	0	0	0	0	0	0	0	0	0	0	0	0	0	0
RPS_01	4.39	5.09	15.11	14.9	1.35	4598.815918	21028.87	39.318	1.3401	31.2183	0	0.1609	1.0174	25.4901	0	0	0	0	0	0	0	0.2031	0.2894	0.5528	0.4099	0	0	0	0	0	0	0	0	0	0	0	0	0	0	0	0	0	0	0	0	0	0	0	0
RPS_01	3.87	4.54	11.79	12.59	1.37	4595.770508	21011.035	76.9662	1.0942	5.9399	6.9478	0.6506	0	0	0	0.7222	7.505	0	0.1741	0	0	0	0	0	0	0	0	0	0	0	0	0	0	0	0	0	0	0	0	0	0	0	0	0	0	0	0	0	0
RPS_01	6.36	7.72	31.78	22.14	1.47	4684.087402	21007.7725	56.2231	1.8923	24.0665	0.5507	0.9819	4.7326	8.2335	0	0.2438	0.9541	0.3342	0.5583	0	0	0	0	1.2288	0	0	0	0	0	0	0	0	0	0	0	0	0	0	0	0	0	0	0	0	0	0	0	0	0
RPS_01	3.76	4.85	11.07	12.44	1.67	4610.70752	21002.625	73.7069	0.8819	6.5427	8.2535	0.7509	0	0	0	0.9662	8.5437	0	0.3542	0	0	0	0	0	0	0	0	0	0	0	0	0	0	0	0	0	0	0	0	0	0	0	0	0	0	0	0	0	0
RPS_01	3.58	4.51	10.05	11.86	1.59	4610.272461	20994.8525	73.1503	0.626	5.0903	9.7729	0.843	0	0	0	0.7501	9.5712	0	0.1961	0	0	0	0	0	0	0	0	0	0	0	0	0	0	0	0	0	0	0	0	0	0	0	0	0	0	0	0	0	0
RPS_01	2.64	2.98	5.48	8.83	1.27	4736.149414	20990.0675	81.5191	0.7474	4.8739	5.8078	0.5126	0	0	0	0.3274	6.2118	0	0	0	0	0	0	0	0	0	0	0	0	0	0	0	0	0	0	0	0	0	0	0	0	0	0	0	0	0	0	0	0
RPS_01	2.88	3.31	6.51	8.97	1.32	4601.42627	20981.73	76.0563	0.7269	4.6273	8.4751	0.5894	0	0	0	0.3966	9.1283	0	0	0	0	0	0	0	0	0	0	0	0	0	0	0	0	0	0	0	0	0	0	0	0	0	0	0	0	0	0	0	0
RPS_01	4.94	5.97	19.13	17.65	1.46	4696.849121	20971.725	59.9217	1.1582	20.4441	3.8506	0.3845	4.1291	5.4111	0	0.2066	3.6038	0.2078	0	0	0	0	0	0.6826	0	0	0	0	0	0	0	0	0	0	0	0	0	0	0	0	0	0	0	0	0	0	0	0	0
RPS_01	2.13	3.16	3.56	7.96	2.2	4615.710693	20969.1875	93.3521	1.2155	2.9299	1.2413	0	0	0	0	0	1.2612	0	0	0	0	0	0	0	0	0	0	0	0	0	0	0	0	0	0	0	0	0	0	0	0	0	0	0	0	0	0	0	0
RPS_01	3.19	3.52	7.98	10.56	1.22	4681.041992	20962.155	72.8343	0.5779	3.3372	11.2499	0.3246	0	0	0	0.2837	11.3923	0	0	0	0	0	0	0	0	0	0	0	0	0	0	0	0	0	0	0	0	0	0	0	0	0	0	0	0	0	0	0	0
RPS_01	2.67	3.48	5.59	10.56	1.7	4616.073242	20961.575	86.0894	1.2361	5.7566	2.6193	0.4412	0	0	0	0.8233	2.6512	0	0.3831	0	0	0	0	0	0	0	0	0	0	0	0	0	0	0	0	0	0	0	0	0	0	0	0	0	0	0	0	0	0
RPS_01	3.9	4.6	11.93	12.88	1.39	4613.462891	20953.89	71.2783	0.5994	5.4477	10.4264	0.7502	0	0	0	0.9774	10.2384	0	0.2821	0	0	0	0	0	0	0	0	0	0	0	0	0	0	0	0	0	0	0	0	0	0	0	0	0	0	0	0	0	0
RPS_01	2.34	2.7	4.29	7.38	1.34	4697.13916	20942.435	88.7482	1.055	5.6225	1.5536	0.4522	0	0	0	0.6694	1.6542	0	0.2449	0	0	0	0	0	0	0	0	0	0	0	0	0	0	0	0	0	0	0	0	0	0	0	0	0	0	0	0	0	0
RPS_01	3.8	4.4	11.37	12.59	1.34	4718.021973	20941.565	71.3961	0.8214	4.4246	11.0253	0.3847	0	0	0	0.2879	11.6602	0	0	0	0	0	0	0	0	0	0	0	0	0	0	0	0	0	0	0	0	0	0	0	0	0	0	0	0	0	0	0	0
RPS_01	2.33	2.67	4.25	7.81	1.32	4626.224609	20939.97	87.4776	1.0215	5.0939	2.7188	0.3782	0	0	0	0.4625	2.8476	0	0	0	0	0	0	0	0	0	0	0	0	0	0	0	0	0	0	0	0	0	0	0	0	0	0	0	0	0	0	0	0
RPS_01	4.66	6.37	17.04	17.22	1.87	4605.776855	20936.49	68.5756	1.1538	13.5737	4.4143	0.9751	1.3843	2.1466	0	1.3146	5.0207	0.2824	0.7021	0	0	0	0	0.4567	0	0	0	0	0	0	0	0	0	0	0	0	0	0	0	0	0	0	0	0	0	0	0	0	0
RPS_01	5.97	6.96	27.99	20.55	1.36	4726.288086	20929.3125	49.3076	1.3732	23.9038	3.6563	0.3454	0.5912	14.9465	0	1.1286	3.4707	0.1816	0.7921	0	0	0	0	0.3028	0	0	0	0	0	0	0	0	0	0	0	0	0	0	0	0	0	0	0	0	0	0	0	0	0
RPS_01	4.47	5.05	15.72	14.61	1.28	4705.695313	20925.035	68.2221	1.8902	19.4846	0	0.4198	3.3413	5.4314	0	0	0	0.2641	0	0	0	0	0	0.9466	0	0	0	0	0	0	0	0	0	0	0	0	0	0	0	0	0	0	0	0	0	0	0	0	0
RPS_01	5.82	7.93	26.63	19.97	1.86	4628.689941	20915.3925	61.9368	0	2.696	17.507	0.4501	0	0	0	0	17.2474	0.1627	0	0	0	0	0	0	0	0	0	0	0	0	0	0	0	0	0	0	0	0	0	0	0	0	0	0	0	0	0	0	0
RPS_01	2.41	2.93	4.54	8.54	1.48	4728.753418	20910.535	88.7387	1.1959	5.9132	1.2724	0.5678	0	0	0	0.7404	1.2121	0	0.3595	0	0	0	0	0	0	0	0	0	0	0	0	0	0	0	0	0	0	0	0	0	0	0	0	0	0	0	0	0	0
RPS_01	2.41	3.21	4.56	8.1	1.78	4628.834961	20910.39	82.9197	1.5195	9.1721	0.8402	0.1479	0	0	0	2.8539	0.2539	0.2367	2.0561	0	0	0	0	0	0	0	0	0	0	0	0	0	0	0	0	0	0	0	0	0	0	0	0	0	0	0	0	0	0
RPS_01	3.42	4.21	9.19	12.73	1.52	4625.209473	20906.185	64.853	1.9407	20.2005	0.2792	0.4824	1.1442	2.481	0	0.3064	0	0.1676	7.7428	0	0	0	0	0.4022	0	0	0	0	0	0	0	0	0	0	0	0	0	0	0	0	0	0	0	0	0	0	0	0	0
RPS_01	2.03	2.5	3.22	6.66	1.52	4681.332031	20891.54	90.1044	1.1857	4.621	1.8496	0.2644	0	0	0	0	1.9749	0	0	0	0	0	0	0	0	0	0	0	0	0	0	0	0	0	0	0	0	0	0	0	0	0	0	0	0	0	0	0	0
RPS_01	2.29	2.98	4.12	7.96	1.69	4711.786133	20885.885	85.044	0.5463	3.5166	4.7575	0.3219	0	0	0	0.3663	5.4473	0	0	0	0	0	0	0	0	0	0	0	0	0	0	0	0	0	0	0	0	0	0	0	0	0	0	0	0	0	0	0	0
RPS_01	2.26	2.7	4	8.1	1.44	4711.496094	20883.115	86.5106	0.8131	3.3701	4.0243	0.3513	0	0	0	0.4198	4.5109	0	0	0	0	0	0	0	0	0	0	0	0	0	0	0	0	0	0	0	0	0	0	0	0	0	0	0	0	0	0	0	0
RPS_01	3.11	3.72	7.58	10.27	1.43	4717.151855	20880.505	77.1793	1.2991	11.8234	1.0811	0.2184	1.9855	5.5881	0	0	0	0	0.1864	0	0	0	0	0.4132	0.2254	0	0	0	0	0	0	0	0	0	0	0	0	0	0	0	0	0	0	0	0	0	0	0	0
RPS_01	2.7	3.24	5.72	8.83	1.44	4608.097168	20875.285	80.5092	0.8655	6.0831	5.52	0.6279	0	0	0	0.4808	5.9136	0	0	0	0	0	0	0	0	0	0	0	0	0	0	0	0	0	0	0	0	0	0	0	0	0	0	0	0	0	0	0	0
RPS_01	5.28	6.6	21.9	17.8	1.56	4710.190918	20872.24	52.5139	1.8471	28.6085	0	0	7.5135	7.982	0	0	0	0	0	0.3674	0	0	0.2186	0.7022	0.2466	0	0	0	0	0	0	0	0	0	0	0	0	0	0	0	0	0	0	0	0	0	0	0	0
RPS_01	2.26	2.53	4	7.23	1.25	4732.958984	20859.625	88.3256	1.0558	4.3472	2.5703	0.2897	0	0	0	0.455	2.7774	0	0.1789	0	0	0	0	0	0	0	0	0	0	0	0	0	0	0	0	0	0	0	0	0	0	0	0	0	0	0	0	0	0
RPS_01	5.85	7.23	26.9	24.31	1.53	4634.055664	20857.2325	62.6137	0	8.5184	10.0701	0.3592	1.0771	4.8844	0	0.9178	9.8798	0.3425	0.6316	0	0	0	0	0.4801	0.2253	0	0	0	0	0	0	0	0	0	0	0	0	0	0	0	0	0	0	0	0	0	0	0	0
RPS_01	4.08	4.76	13.1	13.6	1.36	4660.739258	20854.115	69.302	0.5717	6.3521	10.3366	0.9143	0	0	0	1.2724	10.9095	0	0.3413	0	0	0	0	0	0	0	0	0	0	0	0	0	0	0	0	0	0	0	0	0	0	0	0	0	0	0	0	0	0
RPS_01	3.94	8.04	12.16	29.23	4.17	4631.155273	20843.1675	87.1107	1.2855	3.2436	4.0898	0	0	0	0	0	4.2705	0	0	0	0	0	0	0	0	0	0	0	0	0	0	0	0	0	0	0	0	0	0	0	0	0	0	0	0	0	0	0	0
RPS_01	6.11	7.25	29.35	29.37	1.41	4638.116211	20838.5275	60.7363	1.5935	20.8527	1.5518	0.1533	3.3712	10.5456	0	0.1528	0.3933	0	0.3672	0	0	0	0	0.2825	0	0	0	0	0	0	0	0	0	0	0	0	0	0	0	0	0	0	0	0	0	0	0	0	0
RPS_01	4.68	6.69	17.19	24.45	2.05	4630.430176	20837.875	71.8491	0.7278	8.4183	6.79	1.1641	0	0	0	2.3856	7.4306	0.2551	0.9792	0	0	0	0	0	0	0	0	0	0	0	0	0	0	0	0	0	0	0	0	0	0	0	0	0	0	0	0	0	0
RPS_01	2.01	2.33	3.18	6.51	1.34	4637.246094	20832.075	90.5962	1.1781	4.8984	1.7065	0	0	0	0	0	1.6208	0	0	0	0	0	0	0	0	0	0	0	0	0	0	0	0	0	0	0	0	0	0	0	0	0	0	0	0	0	0	0	0
RPS_01	4.01	4.39	12.6	13.75	1.2	4601.861328	20828.45	67.1833	0.5406	6.7743	10.903	0.9144	0	0	0	1.0866	12.2662	0	0.3317	0	0	0	0	0	0	0	0	0	0	0	0	0	0	0	0	0	0	0	0	0	0	0	0	0	0	0	0	0	0
RPS_01	3.32	3.86	8.65	10.85	1.35	4729.768555	20828.885	79.4098	0.9676	5.4874	6.2942	0.3227	0	0	0	0.6541	6.6259	0	0.2384	0	0	0	0	0	0	0	0	0	0	0	0	0	0	0	0	0	0	0	0	0	0	0	0	0	0	0	0	0	0
RPS_01	3.25	3.77	8.31	11.29	1.35	4706.56543	20828.45	77.2835	0.9752	6.9187	6.3685	0.5407	0	0	0	1.1004	6.4126	0	0.4003	0	0	0	0	0	0	0	0	0	0	0	0	0	0	0	0	0	0	0	0	0	0	0	0	0	0	0	0	0	0
RPS_01	2.46	3.07	4.75	8.1	1.55	4627.819824	20824.39	83.7343	1.1002	2.9554	5.7734	0.1342	0	0	0	0	6.3026	0	0	0	0	0	0	0	0	0	0	0	0	0	0	0	0	0	0	0	0	0	0	0	0	0	0	0	0	0	0	0	0
RPS_01	1.7	1.93	2.28	5.64	1.28	4728.898438	20817.43	91.6721	1.206	3.9207	1.555	0.1613	0	0	0	0	1.4849	0	0	0	0	0	0	0	0	0	0	0	0	0	0	0	0	0	0	0	0	0	0	0	0	0	0	0	0	0	0	0	0
RPS_01	4.98	6.61	19.49	17.22	1.76	4706.855469	20814.8925	63.9833	1.8746	5.6748	13.9627	0.5495	0	0	0	0.4399	13.3485	0	0.1668	0	0	0	0	0	0	0	0	0	0	0	0	0	0	0	0	0	0	0	0	0	0	0	0	0	0	0	0	0	0
RPS_01	4.34	5.55	14.8	15.77	1.63	4670.745605	20800.61	65.1563	0.5736	5.5925	13.4902	0.6645	0	0	0	0.5193	13.8263	0	0.1774	0	0	0	0	0	0	0	0	0	0	0	0	0	0	0	0	0	0	0	0	0	0	0	0	0	0	0	0	0	0
RPS_01	2.17	2.34	3.71	6.8	1.16	4616.65332	20789.01	86.2086	0.891	4.5643	3.7139	0.4004	0	0	0	0.4162	3.8055	0	0	0	0	0	0	0	0	0	0	0	0	0	0	0	0	0	0	0	0	0	0	0	0	0	0	0	0	0	0	0	0
RPS_01	2.31	2.95	4.19	7.81	1.63	4634.345703	20777.555	89.4155	1.4175	5.5684	1.4934	0.3696	0	0	0	0.3852	1.3503	0	0	0	0	0	0	0	0	0	0	0	0	0	0	0	0	0	0	0	0	0	0	0	0	0	0	0	0	0	0	0	0
RPS_01	3.52	3.86	9.73	12.01	1.2	4736.149414	20771.61	72.122	0.7401	4.2905	10.5574	0.5148	0	0	0	0.774	10.7511	0	0.2501	0	0	0	0	0	0	0	0	0	0	0	0	0	0	0	0	0	0	0	0	0	0	0	0	0	0	0	0	0	0
RPS_01	6.52	7.46	33.37	22.57	1.31	4641.016602	20766.1575	46.568	2.2349	32.1526	0.124	5.7485	5.008	5.2803	0	0	0	0	0	0.4379	0	0	0.1991	2.0048	0.2421	0	0	0	0	0	0	0	0	0	0	0	0	0	0	0	0	0	0	0	0	0	0	0	0
RPS_01	7.01	7.9	38.58	23.44	1.27	4630.140137	20738.1725	54.269	1.5739	22.0249	4.3211	2.4603	2.5428	4.4308	0	0.6675	4.8468	0.1892	0.8707	0.2039	0	0	0	1.3457	0.2534	0	0	0	0	0	0	0	0	0	0	0	0	0	0	0	0	0	0	0	0	0	0	0	0
RPS_01	1.63	2.05	2.09	5.5	1.57	4649.427734	20737.52	93.5429	0.7305	3.8788	0.8626	0.1184	0	0	0	0.2097	0.6572	0	0	0	0	0	0	0	0	0	0	0	0	0	0	0	0	0	0	0	0	0	0	0	0	0	0	0	0	0	0	0	0
RPS_01	2.6	2.98	5.3	8.83	1.32	4610.5625	20732.3	79.8718	0.8325	5.2342	5.9304	0.6407	0	0	0	0.9174	6.3039	0	0.2691	0	0	0	0	0	0	0	0	0	0	0	0	0	0	0	0	0	0	0	0	0	0	0	0	0	0	0	0	0	0
RPS_01	3.24	3.83	8.25	10.85	1.4	4696.269043	20720.7	74.5751	1.8023	15.5828	0	0	2.8974	4.3328	0	0	0	0.2461	0	0	0	0	0	0.5636	0	0	0	0	0	0	0	0	0	0	0	0	0	0	0	0	0	0	0	0	0	0	0	0	0
RPS_01	3.58	4.21	10.07	12.44	1.38	4672.195801	20720.265	72.3013	0.7593	5.2113	9.5695	0.8311	0	0	0	0.7814	10.2234	0	0.3228	0	0	0	0	0	0	0	0	0	0	0	0	0	0	0	0	0	0	0	0	0	0	0	0	0	0	0	0	0	0
RPS_01	2.15	2.64	3.62	7.09	1.51	4610.70752	20712.29	87.9128	0.9711	4.3523	3.0779	0.2983	0	0	0	0.1947	3.193	0	0	0	0	0	0	0	0	0	0	0	0	0	0	0	0	0	0	0	0	0	0	0	0	0	0	0	0	0	0	0	0
RPS_01	3.89	4.4	11.89	12.44	1.28	4683.797363	20703.155	65.0038	0	4.0033	14.4344	0.6207	0	0	0	0.5821	15.1134	0	0.2423	0	0	0	0	0	0	0	0	0	0	0	0	0	0	0	0	0	0	0	0	0	0	0	0	0	0	0	0	0	0
RPS_01	5.24	7.2	21.58	19.1	1.88	4705.695313	20701.3425	57.2042	1.7169	24.4013	0.2845	0.6526	4.3759	9.0466	0	0	0	0.5651	0	0	0	0	0	1.7529	0	0	0	0	0	0	0	0	0	0	0	0	0	0	0	0	0	0	0	0	0	0	0	0	0
RPS_01	2.87	3.48	6.47	9.12	1.47	4691.918457	20691.41	74.1368	0.6594	4.6751	9.2764	0.6163	0	0	0	0.4816	10.1545	0	0	0	0	0	0	0	0	0	0	0	0	0	0	0	0	0	0	0	0	0	0	0	0	0	0	0	0	0	0	0	0
RPS_01	3.75	4.28	11.03	12.44	1.31	4601.42627	20680.68	67.8322	0.8654	5.5869	12.0714	0.6833	0	0	0	0.6008	12.3599	0	0	0	0	0	0	0	0	0	0	0	0	0	0	0	0	0	0	0	0	0	0	0	0	0	0	0	0	0	0	0	0
RPS_01	2.29	2.67	4.1	7.38	1.36	4699.894531	20673.14	85.6098	0.929	5.0902	3.7336	0.3832	0	0	0	0.434	3.8202	0	0	0	0	0	0	0	0	0	0	0	0	0	0	0	0	0	0	0	0	0	0	0	0	0	0	0	0	0	0	0	0
RPS_01	4.27	5.36	14.32	14.32	1.57	4679.011719	20670.0225	66.2109	0.5601	6.7499	11.7459	1.0243	0	0	0	0.9464	12.5099	0	0.2527	0	0	0	0	0	0	0	0	0	0	0	0	0	0	0	0	0	0	0	0	0	0	0	0	0	0	0	0	0	0
RPS_01	2.91	3.37	6.64	9.26	1.34	4599.250977	20664.295	79.1445	0.9514	4.5975	7.0468	0.4133	0	0	0	0.5063	7.1324	0	0.2078	0	0	0	0	0	0	0	0	0	0	0	0	0	0	0	0	0	0	0	0	0	0	0	0	0	0	0	0	0	0
RPS_01	1.34	1.69	1.4	4.49	1.61	4651.312988	20646.8075	94.0413	0.881	3.3921	0.8545	0	0	0	0	0	0.8311	0	0	0	0	0	0	0	0	0	0	0	0	0	0	0	0	0	0	0	0	0	0	0	0	0	0	0	0	0	0	0	0
RPS_01	2.92	3.41	6.7	9.98	1.36	4597.655762	20639.92	77.3626	0.8355	4.4291	8.1202	0.4028	0	0	0	0.4922	8.3575	0	0	0	0	0	0	0	0	0	0	0	0	0	0	0	0	0	0	0	0	0	0	0	0	0	0	0	0	0	0	0	0
RPS_01	3.65	3.84	10.47	11.58	1.11	4670.890625	20639.63	66.4301	0	4.9457	12.7029	0.7737	0	0	0	1.0705	13.5992	0.1806	0.2972	0	0	0	0	0	0	0	0	0	0	0	0	0	0	0	0	0	0	0	0	0	0	0	0	0	0	0	0	0	0
RPS_01	5.31	6.47	22.13	19.97	1.49	4679.591797	20638.1075	63.9381	1.6656	20.0472	0	0.4476	4.4846	7.3254	0	0	0	0.7941	0	0	0	0	0	1.2974	0	0	0	0	0	0	0	0	0	0	0	0	0	0	0	0	0	0	0	0	0	0	0	0	0
RPS_01	4.51	5.26	15.97	16.35	1.36	4605.631836	20626.435	48.1278	1.726	28.841	2.4833	0.1746	5.2935	12.4464	0	0	0	0.301	0.1739	0	0	0	0	0.4325	0	0	0	0	0	0	0	0	0	0	0	0	0	0	0	0	0	0	0	0	0	0	0	0	0
RPS_01	2.23	2.48	3.89	7.23	1.24	4688.00293	20619.475	86.7065	0.8295	3.3797	4.2214	0.1205	0	0	0	0.1511	4.5912	0	0	0	0	0	0	0	0	0	0	0	0	0	0	0	0	0	0	0	0	0	0	0	0	0	0	0	0	0	0	0	0
RPS_01	4.01	5.36	12.6	12.88	1.79	4638.55127	20615.56	70.2659	1.2137	13.2302	4.109	0.7805	0.874	1.8499	0	0.3781	4.1341	0.3454	2.5663	0	0	0	0	0.2529	0	0	0	0	0	0	0	0	0	0	0	0	0	0	0	0	0	0	0	0	0	0	0	0	0
RPS_01	3.25	3.8	8.31	10.56	1.36	4638.986328	20601.205	74.2608	0	4.225	10.1369	0.339	0	0	0	0.4063	10.6319	0	0	0	0	0	0	0	0	0	0	0	0	0	0	0	0	0	0	0	0	0	0	0	0	0	0	0	0	0	0	0	0
RPS_01	3.49	4.67	9.59	12.73	1.79	4688.147949	20598.16	72.4442	2.2834	16.3269	0.1066	0.1363	0	0.1689	0	0	0	0	8.5337	0	0	0	0	0	0	0	0	0	0	0	0	0	0	0	0	0	0	0	0	0	0	0	0	0	0	0	0	0	0
RPS_01	2.92	3.26	6.7	9.69	1.25	4697.864258	20591.2	76.6753	0.9838	5.4751	7.3066	0.62	0	0	0	0.928	7.6268	0	0.3844	0	0	0	0	0	0	0	0	0	0	0	0	0	0	0	0	0	0	0	0	0	0	0	0	0	0	0	0	0	0
RPS_01	5.62	7.33	24.83	19.68	1.7	4664.074707	20581.2675	48.5538	1.8114	30.2098	0.5658	0.224	1.0243	16.6969	0	0.2518	0.4076	0	0	0	0	0	0	0.2547	0	0	0	0	0	0	0	0	0	0	0	0	0	0	0	0	0	0	0	0	0	0	0	0	0
RPS_01	4.15	4.71	13.5	14.03	1.29	4699.894531	20576.99	49.88	2.0456	30.1875	0	0	1.2655	16.3446	0	0	0	0	0	0	0	0	0	0.2768	0	0	0	0	0	0	0	0	0	0	0	0	0	0	0	0	0	0	0	0	0	0	0	0	0
RPS_01	4.03	4.6	12.73	13.02	1.3	4734.844238	20575.25	68.5503	0.5275	5.0638	11.2481	0.6855	0	0	0	1.0982	11.9838	0.2584	0.5843	0	0	0	0	0	0	0	0	0	0	0	0	0	0	0	0	0	0	0	0	0	0	0	0	0	0	0	0	0	0
RPS_01	3.57	5.28	9.99	12.73	2.19	4698.299316	20565.1	78.7102	1.2186	8.1085	4.7474	0.4976	0.2481	0.4089	0	0.2419	5.4145	0	0.4043	0	0	0	0	0	0	0	0	0	0	0	0	0	0	0	0	0	0	0	0	0	0	0	0	0	0	0	0	0	0
RPS_01	3.82	4.75	11.47	13.6	1.54	4620.713867	20560.17	64.8926	0.5933	5.8172	12.525	0.7898	0	0.1248	0	0.8292	13.3438	0.1872	0.3641	0	0	0	0	0.2262	0.3067	0	0	0	0	0	0	0	0	0	0	0	0	0	0	0	0	0	0	0	0	0	0	0	0
RPS_01	2.58	3.34	5.23	7.96	1.67	4614.913086	20557.85	88.0312	1.504	4.5506	2.6625	0.4004	0	0	0	0	2.8514	0	0	0	0	0	0	0	0	0	0	0	0	0	0	0	0	0	0	0	0	0	0	0	0	0	0	0	0	0	0	0	0
RPS_01	2.27	3.2	4.04	8.54	1.99	4719.182129	20557.27	87.7608	1.1558	7.1638	0.9775	0.5833	0	0	0	1.208	0.6574	0	0.4934	0	0	0	0	0	0	0	0	0	0	0	0	0	0	0	0	0	0	0	0	0	0	0	0	0	0	0	0	0	0
RPS_01	4.25	5.93	14.17	25.47	1.95	4725.272949	20551.6875	91.4187	1.8744	4.0425	1.2434	0.1358	0	0	0	0	1.2852	0	0	0	0	0	0	0	0	0	0	0	0	0	0	0	0	0	0	0	0	0	0	0	0	0	0	0	0	0	0	0	0
RPS_01	4	4.88	12.54	14.03	1.49	4658.999023	20541.9	67.3518	0.5175	6.0478	11.4745	0.9798	0	0	0	0.9124	12.1308	0.1837	0.4017	0	0	0	0	0	0	0	0	0	0	0	0	0	0	0	0	0	0	0	0	0	0	0	0	0	0	0	0	0	0
RPS_01	4.73	6.02	17.54	16.64	1.62	4458.066895	20635.7875	57.745	2.1839	24.3905	0.394	0.4105	2.8488	9.7355	0	0	0.1851	0.2339	0	1.0272	0	0	0	0.8457	0	0	0	0	0	0	0	0	0	0	0	0	0	0	0	0	0	0	0	0	0	0	0	0	0
RPS_01	2.36	2.7	4.38	7.81	1.31	4523.180664	20634.99	80.6248	0.9568	5.1516	5.4919	0.7591	0	0	0	0.8359	5.9127	0	0.2672	0	0	0	0	0	0	0	0	0	0	0	0	0	0	0	0	0	0	0	0	0	0	0	0	0	0	0	0	0	0
RPS_01	3.05	3.52	7.33	9.98	1.33	4473.729004	20629.045	81.6584	1.1739	2.9541	6.6416	0.2263	0	0	0	0.2884	7.0574	0	0	0	0	0	0	0	0	0	0	0	0	0	0	0	0	0	0	0	0	0	0	0	0	0	0	0	0	0	0	0	0
RPS_01	2.17	2.39	3.71	6.95	1.21	4539.567871	20626	84.3073	1.0595	4.7934	4.3659	0.3413	0	0	0	0.2211	4.9115	0	0	0	0	0	0	0	0	0	0	0	0	0	0	0	0	0	0	0	0	0	0	0	0	0	0	0	0	0	0	0	0
RPS_01	3.08	3.39	7.47	10.13	1.21	4508.678711	20619.4025	84.9329	1.0829	5.2555	3.4981	0.341	0	0	0	0.6079	4.0081	0	0.2735	0	0	0	0	0	0	0	0	0	0	0	0	0	0	0	0	0	0	0	0	0	0	0	0	0	0	0	0	0	0
RPS_01	5.81	8.09	26.52	21.99	1.94	4458.356934	20585.3275	58.1431	0	5.7928	14.8861	0.7443	0.2311	0.3715	0	1.6769	16.4624	0.3224	1.0601	0	0	0	0	0	0.3095	0	0	0	0	0	0	0	0	0	0	0	0	0	0	0	0	0	0	0	0	0	0	0	0
RPS_01	5.25	5.86	21.67	18.09	1.25	4477.064453	20576.845	58.7178	0	5.0516	16.752	0.9011	0	0	0	1.031	16.8993	0	0.3894	0	0	0	0	0	0.2578	0	0	0	0	0	0	0	0	0	0	0	0	0	0	0	0	0	0	0	0	0	0	0	0
RPS_01	2.27	2.43	4.04	7.23	1.14	4531.301758	20578.005	83.8784	0.5673	4.8868	4.6494	0.5202	0	0	0	0.5985	4.8995	0	0	0	0	0	0	0	0	0	0	0	0	0	0	0	0	0	0	0	0	0	0	0	0	0	0	0	0	0	0	0	0
RPS_01	6.1	8.53	29.2	21.41	1.96	4551.459473	20571.6975	54.3708	1.6443	28.5851	0	2.1706	2.932	9.7863	0	0	0	0	0	0	0	0	0	0.511	0	0	0	0	0	0	0	0	0	0	0	0	0	0	0	0	0	0	0	0	0	0	0	0	0
RPS_01	4.99	5.96	19.55	16.78	1.43	4389.972656	20648.62	50.1933	1.6659	28.8146	0	0.2637	7.8567	9.3073	0	0	0	0.5203	0.1659	0	0	0	0	1.2126	0	0	0	0	0	0	0	0	0	0	0	0	0	0	0	0	0	0	0	0	0	0	0	0	0
RPS_01	1.96	2.67	3.01	7.23	1.85	4366.189453	20647.895	83.9872	0.6779	6.8508	2.8638	0.8329	0	0	0	1.3585	2.895	0	0.534	0	0	0	0	0	0	0	0	0	0	0	0	0	0	0	0	0	0	0	0	0	0	0	0	0	0	0	0	0	0
RPS_01	2.93	3.5	6.72	10.13	1.43	4393.743164	20643.255	78.5221	0.9774	4.2954	7.4429	0.4062	0	0	0	0.2582	8.0979	0	0	0	0	0	0	0	0	0	0	0	0	0	0	0	0	0	0	0	0	0	0	0	0	0	0	0	0	0	0	0	0
RPS_01	6.78	7.97	36.11	24.74	1.38	4301.945801	20623.4625	53.3142	0.8046	16.4715	8.9542	0.6222	3.0504	3.7403	0	0.6371	9.3558	0.4628	0.4402	0	0	0.2067	0	1.9399	0	0	0	0	0	0	0	0	0	0	0	0	0	0	0	0	0	0	0	0	0	0	0	0	0
RPS_01	1.98	3.18	3.08	7.38	2.58	4306.586426	20617.3	91.6139	1.4346	5.4251	0.2438	0	0	0	0	0.7826	0	0	0.5001	0	0	0	0	0	0	0	0	0	0	0	0	0	0	0	0	0	0	0	0	0	0	0	0	0	0	0	0	0	0
RPS_01	4.27	4.85	14.32	15.63	1.29	4334.067627	20615.85	67.4688	0	5.6081	11.4696	1.2243	0	0	0	1.162	12.8829	0	0.1844	0	0	0	0	0	0	0	0	0	0	0	0	0	0	0	0	0	0	0	0	0	0	0	0	0	0	0	0	0	0
RPS_01	3.57	3.77	9.99	11.72	1.12	4415.931152	20610.195	68.353	0.6705	6.243	10.4109	0.7957	0	0	0	1.5209	10.9173	0.1971	0.6292	0	0	0	0	0	0.2624	0	0	0	0	0	0	0	0	0	0	0	0	0	0	0	0	0	0	0	0	0	0	0	0
RPS_01	2.37	4.07	4.4	11	2.97	4312.387207	20608.455	93.4283	1.1376	2.9126	1.2582	0	0	0	0	0	1.2633	0	0	0	0	0	0	0	0	0	0	0	0	0	0	0	0	0	0	0	0	0	0	0	0	0	0	0	0	0	0	0	0
RPS_01	3.08	3.55	7.43	10.42	1.33	4441.019531	20601.06	74.4669	0.7084	6.6925	7.3784	0.83	0	0	0	1.8044	7.4322	0	0.6871	0	0	0	0	0	0	0	0	0	0	0	0	0	0	0	0	0	0	0	0	0	0	0	0	0	0	0	0	0	0
RPS_01	2.41	2.7	4.54	7.81	1.26	4299.480469	20580.615	83.8992	0.9538	4.9626	4.1456	0.5477	0	0	0	0.9253	4.2782	0	0.2876	0	0	0	0	0	0	0	0	0	0	0	0	0	0	0	0	0	0	0	0	0	0	0	0	0	0	0	0	0	0
RPS_01	3.14	3.59	7.72	9.69	1.31	4399.398926	20580.325	70.4333	0	5.6523	10.0788	1.1522	0	0	0	1.3144	10.8011	0.1677	0.4002	0	0	0	0	0	0	0	0	0	0	0	0	0	0	0	0	0	0	0	0	0	0	0	0	0	0	0	0	0	0
RPS_01	4.48	5.26	15.74	15.05	1.38	4405.924805	20552.92	54.3082	1.5335	25.2179	0.1204	1.4386	5.7012	9.4658	0	0	0	1.0763	0	0	0	0	0	1.138	0	0	0	0	0	0	0	0	0	0	0	0	0	0	0	0	0	0	0	0	0	0	0	0	0
RPS_01	1.53	2.14	1.84	5.06	1.95	4383.446777	20553.065	92.2812	0.9004	4.0429	0	0	0	0	0	0	0	0	2.7755	0	0	0	0	0	0	0	0	0	0	0	0	0	0	0	0	0	0	0	0	0	0	0	0	0	0	0	0	0	0
RPS_01	3.16	3.91	7.83	10.42	1.53	4376.920898	20542.19	73.2521	0.7108	5.0466	9.3819	0.5783	0	0	0	0.7426	10.0052	0	0.2826	0	0	0	0	0	0	0	0	0	0	0	0	0	0	0	0	0	0	0	0	0	0	0	0	0	0	0	0	0	0
RPS_01	1.52	1.76	1.82	4.92	1.34	4236.026855	20653.695	91.1751	1.1187	5.5671	0	0	0	2.1391	0	0	0	0	0	0	0	0	0	0	0	0	0	0	0	0	0	0	0	0	0	0	0	0	0	0	0	0	0	0	0	0	0	0	0
RPS_01	2.84	3.34	6.32	9.4	1.39	4240.087402	20645.72	80.8733	0.6181	5.5883	5.4216	0.5763	0	0	0	0.9257	5.7447	0	0.252	0	0	0	0	0	0	0	0	0	0	0	0	0	0	0	0	0	0	0	0	0	0	0	0	0	0	0	0	0	0
RPS_01	3.8	5.08	11.35	15.77	1.79	4254.299316	20624.405	70.0018	1.6588	16.3922	0	0	0.5372	0.8107	0	0	0	0	9.9382	0	0	0	0	0.3964	0.2647	0	0	0	0	0	0	0	0	0	0	0	0	0	0	0	0	0	0	0	0	0	0	0	0
RPS_01	3.35	3.75	8.79	10.13	1.26	4235.591797	20605.555	68.3552	0.554	4.6783	11.4968	0.853	0	0	0	1.4777	12.1233	0	0.4617	0	0	0	0	0	0	0	0	0	0	0	0	0	0	0	0	0	0	0	0	0	0	0	0	0	0	0	0	0	0
RPS_01	1.66	1.9	2.16	5.64	1.32	4256.32959	20605.3375	90.6138	1.3481	4.4102	1.6422	0.1967	0	0	0	0.1845	1.6045	0	0	0	0	0	0	0	0	0	0	0	0	0	0	0	0	0	0	0	0	0	0	0	0	0	0	0	0	0	0	0	0
RPS_01	3.4	4.42	9.09	15.19	1.69	4263.870605	20599.755	69.7851	1.6955	18.0743	0	0	2.2482	7.7796	0	0	0	0	0	0	0	0	0	0.4174	0	0	0	0	0	0	0	0	0	0	0	0	0	0	0	0	0	0	0	0	0	0	0	0	0
RPS_01	3.56	4.14	9.94	12.44	1.35	4181.499512	20584.385	66.9286	2.5475	18.2187	0.4769	0.3762	2.0271	5.1277	0	0	0	0	0	1.5566	0	0	0	2.7407	0	0	0	0	0	0	0	0	0	0	0	0	0	0	0	0	0	0	0	0	0	0	0	0	0
RPS_01	0.86	1.1	0.59	2.89	1.63	4219.20459	20582.1375	90.0956	1.0645	5.8914	0.1128	0.1067	1.1389	1.251	0	0	0	0	0	0	0	0	0	0.339	0	0	0	0	0	0	0	0	0	0	0	0	0	0	0	0	0	0	0	0	0	0	0	0	0
RPS_01	5	6.36	19.66	19.39	1.61	4218.189453	20578.3675	63.4998	0.5676	13.6592	6.1923	0.6248	2.648	4.0135	0	0.625	6.1353	0.4547	0.4282	0	0	0.1823	0	0.6446	0.3248	0	0	0	0	0	0	0	0	0	0	0	0	0	0	0	0	0	0	0	0	0	0	0	0
RPS_01	1.69	1.93	2.24	5.64	1.31	4267.206055	20580.035	90.8842	1.1358	3.8609	1.6958	0.2529	0	0	0	0.4292	1.7411	0	0	0	0	0	0	0	0	0	0	0	0	0	0	0	0	0	0	0	0	0	0	0	0	0	0	0	0	0	0	0	0
RPS_01	1.7	1.95	2.28	5.35	1.3	4234.141602	20578.8025	90.3317	1.1721	4.4667	2.0395	0	0	0	0	0	1.99	0	0	0	0	0	0	0	0	0	0	0	0	0	0	0	0	0	0	0	0	0	0	0	0	0	0	0	0	0	0	0	0
RPS_01	2.26	2.91	4	7.67	1.67	4207.603027	20576.99	82.8377	0.7713	3.9096	5.726	0.3725	0	0	0	0.1663	6.2166	0	0	0	0	0	0	0	0	0	0	0	0	0	0	0	0	0	0	0	0	0	0	0	0	0	0	0	0	0	0	0	0
RPS_01	4.69	6.05	17.27	17.07	1.66	4182.659668	20562.5625	63.1458	1.1114	5.3568	13.9329	0.752	0	0	0	0.4712	14.8154	0.1839	0.2307	0	0	0	0	0	0	0	0	0	0	0	0	0	0	0	0	0	0	0	0	0	0	0	0	0	0	0	0	0	0
RPS_01	2.27	2.53	4.06	7.23	1.23	4155.686035	20563.94	82.6023	0.6498	3.9179	5.3333	0.5719	0	0	0	0.6023	6.0969	0	0.2256	0	0	0	0	0	0	0	0	0	0	0	0	0	0	0	0	0	0	0	0	0	0	0	0	0	0	0	0	0	0
RPS_01	2.6	2.98	5.3	8.54	1.32	4227.615723	20558.43	81.2305	0.9048	4.23	6.4701	0.207	0	0	0	0.1992	6.7585	0	0	0	0	0	0	0	0	0	0	0	0	0	0	0	0	0	0	0	0	0	0	0	0	0	0	0	0	0	0	0	0
RPS_01	2.13	2.29	3.56	6.8	1.15	4188.460449	20553.065	87.5295	0.9455	4.5144	2.9693	0.3653	0	0	0	0.525	2.9455	0	0.2054	0	0	0	0	0	0	0	0	0	0	0	0	0	0	0	0	0	0	0	0	0	0	0	0	0	0	0	0	0	0
RPS_01	2.43	2.91	4.65	7.67	1.43	4163.51709	20552.195	80.3328	0	4.2181	6.9567	0.3945	0	0	0	0.4532	7.6447	0	0	0	0	0	0	0	0	0	0	0	0	0	0	0	0	0	0	0	0	0	0	0	0	0	0	0	0	0	0	0	0
RPS_01	2.9	3.48	6.62	9.69	1.44	4176.858887	20551.47	78.7866	1.0497	5.2799	6.0203	0.8083	0	0	0	1.1395	6.5201	0	0.3956	0	0	0	0	0	0	0	0	0	0	0	0	0	0	0	0	0	0	0	0	0	0	0	0	0	0	0	0	0	0
RPS_01	2.58	3.12	5.23	8.83	1.46	4124.281738	20643.835	74.7151	1.4158	15.4217	0	0.6822	2.2947	4.3052	0	0	0	0	0.2871	0	0	0	0	0.8781	0	0	0	0	0	0	0	0	0	0	0	0	0	0	0	0	0	0	0	0	0	0	0	0	0
RPS_01	5.37	6.87	22.65	18.81	1.64	4097.598145	20636.6575	48.4516	1.158	24.3917	5.7534	0.2281	0.5867	13.0336	0	0.406	5.6479	0.1614	0.1817	0	0	0	0	0	0	0	0	0	0	0	0	0	0	0	0	0	0	0	0	0	0	0	0	0	0	0	0	0	0
RPS_01	6.9	8.97	37.41	23.15	1.69	4110.939941	20629.8425	53.6124	1.8364	28.4754	0	0.4814	5.6459	7.7457	0	0	0	0.2364	0.2329	0	0	0	0	1.7335	0	0	0	0	0	0	0	0	0	0	0	0	0	0	0	0	0	0	0	0	0	0	0	0	0
RPS_01	3.78	4.71	11.24	13.89	1.55	4048.146484	20622.52	63.0214	1.4889	22.0467	0.3284	0.2632	5.4868	6.4181	0	0	0	0	0	0	0	0	0	0.9466	0	0	0	0	0	0	0	0	0	0	0	0	0	0	0	0	0	0	0	0	0	0	0	0	0
RPS_01	4.6	6.64	16.62	16.93	2.08	4075.410156	20615.415	61.9364	0.7735	14.351	6.2002	1.9549	1.7338	3.1203	0	1.3235	7.4619	0.2107	0.3225	0	0	0	0	0.6113	0	0	0	0	0	0	0	0	0	0	0	0	0	0	0	0	0	0	0	0	0	0	0	0	0
RPS_01	5.12	8.57	20.62	19.1	2.79	4112.390137	20611.1375	55.8146	1.894	26.1966	0	0.7588	1.4728	3.253	0	0	0.3673	0	9.877	0	0	0	0	0.3659	0	0	0	0	0	0	0	0	0	0	0	0	0	0	0	0	0	0	0	0	0	0	0	0	0
RPS_01	4.2	5.35	13.86	14.47	1.62	4029.583984	20605.845	65.3689	1.0157	14.7344	1.2234	0	4.8531	9.8961	0	0	0	0.7795	1.1003	0.1974	0	0	0	0.8312	0	0	0	0	0	0	0	0	0	0	0	0	0	0	0	0	0	0	0	0	0	0	0	0	0
RPS_01	3.37	3.84	8.9	11.72	1.3	4125.296875	20599.32	73.2263	0.9403	4.9895	9.4315	0.6222	0	0	0	0.8018	9.9885	0	0	0	0	0	0	0	0	0	0	0	0	0	0	0	0	0	0	0	0	0	0	0	0	0	0	0	0	0	0	0	0
RPS_01	4.82	5.65	18.28	21.7	1.37	4033.354492	20593.52	63.7651	1.5275	18.4143	2.876	0.1322	5.0425	4.8878	0	0	3.037	0	0	0	0	0	0	0.3174	0	0	0	0	0	0	0	0	0	0	0	0	0	0	0	0	0	0	0	0	0	0	0	0	0
RPS_01	3.97	4.51	12.35	13.31	1.29	4099.338379	20593.81	63.6787	0	7.346	12.7486	0.9973	0	0	0	1.2767	13.3568	0.2338	0.3621	0	0	0	0	0	0	0	0	0	0	0	0	0	0	0	0	0	0	0	0	0	0	0	0	0	0	0	0	0	0
RPS_01	2.69	3.25	5.67	8.54	1.46	4115.870605	20588.59	78.4851	1.2227	13.2601	0	0.3639	2.1782	3.63	0	0	0	0.3472	0	0	0	0	0	0.5128	0	0	0	0	0	0	0	0	0	0	0	0	0	0	0	0	0	0	0	0	0	0	0	0	0
RPS_01	2.42	2.81	4.58	7.38	1.35	4004.640625	20571.19	85.1879	1.374	4.4199	4.0215	0.4114	0	0	0	0.4262	4.1591	0	0	0	0	0	0	0	0	0	0	0	0	0	0	0	0	0	0	0	0	0	0	0	0	0	0	0	0	0	0	0	0
RPS_01	6.41	8.6	32.3	21.85	1.8	4070.769531	20566.0425	60.0018	1.7033	24.3373	0.129	1.4395	3.2095	7.1396	0	0	0	0.4621	0.3635	0	0	0	0	1.2144	0	0	0	0	0	0	0	0	0	0	0	0	0	0	0	0	0	0	0	0	0	0	0	0	0
RPS_01	3.72	4.35	10.84	12.88	1.37	4130.227539	20554.805	63.5821	1.4692	21.0813	1.3804	0.23	3.7865	7.0123	0	0	0	0.75	0.2428	0	0	0	0	0.4655	0	0	0	0	0	0	0	0	0	0	0	0	0	0	0	0	0	0	0	0	0	0	0	0	0
RPS_01	4	5.37	12.54	15.05	1.81	4144.004395	20554.805	67.8632	1.8416	19.0626	0	0.2489	2.4124	7.1949	0	0	0	0.2644	0.1797	0	0	0	0	0.9323	0	0	0	0	0	0	0	0	0	0	0	0	0	0	0	0	0	0	0	0	0	0	0	0	0
RPS_01	3.39	3.9	9	11.58	1.32	4065.838867	20548.86	64.7108	1.3759	20.1992	0	0.5713	4.2112	6.9047	0	0	0	0.5167	0.2906	0.2466	0	0	0	0.9731	0	0	0	0	0	0	0	0	0	0	0	0	0	0	0	0	0	0	0	0	0	0	0	0	0
RPS_01	5.75	6.59	25.94	22.86	1.31	4071.639648	20547.4825	62.7714	0.9007	15.5397	5.6426	0.6359	1.0818	4.0284	0	0.5873	7.034	0.187	1.2962	0	0	0	0	0.2949	0	0	0	0	0	0	0	0	0	0	0	0	0	0	0	0	0	0	0	0	0	0	0	0	0
RPS_01	3.91	4.52	12.04	13.02	1.33	4105.28418	20545.815	62.7659	0	7.3576	12.6331	1.1464	0	0	0	1.4196	14.0053	0.171	0.5012	0	0	0	0	0	0	0	0	0	0	0	0	0	0	0	0	0	0	0	0	0	0	0	0	0	0	0	0	0	0
RPS_01	2.89	3.25	6.57	9.4	1.26	3966.49292	20652.3175	74.1007	1.5142	16.5554	0	0	3.6118	3.6735	0	0	0	0	0	0	0	0	0	0.3316	0.2129	0	0	0	0	0	0	0	0	0	0	0	0	0	0	0	0	0	0	0	0	0	0	0	0
RPS_01	2.81	3.07	6.22	8.97	1.19	3998.614746	20649.78	77.2009	0.588	4.6623	8.0388	0.4348	0	0	0	0.4434	8.6319	0	0	0	0	0	0	0	0	0	0	0	0	0	0	0	0	0	0	0	0	0	0	0	0	0	0	0	0	0	0	0	0
RPS_01	2.98	3.63	6.99	10.42	1.48	3935.53125	20640.21	73.7601	0.6748	6.9116	7.5934	1.0493	0.1261	0.6708	0	0.4327	8.5765	0	0.2046	0	0	0	0	0	0	0	0	0	0	0	0	0	0	0	0	0	0	0	0	0	0	0	0	0	0	0	0	0	0
RPS_01	0.89	1.1	0.63	3.04	1.52	3883.904297	20635.0625	94.505	0.8799	3.2605	0.6769	0	0	0	0	0	0.6777	0	0	0	0	0	0	0	0	0	0	0	0	0	0	0	0	0	0	0	0	0	0	0	0	0	0	0	0	0	0	0	0
RPS_01	1.91	2.18	2.87	6.22	1.3	3969.755859	20622.23	89.1557	0.6361	4.996	1.6917	0.62	0	0	0	0.6362	2.0475	0	0.2167	0	0	0	0	0	0	0	0	0	0	0	0	0	0	0	0	0	0	0	0	0	0	0	0	0	0	0	0	0	0
RPS_01	3.02	3.41	7.16	10.42	1.27	3893.330566	20620.635	77.8743	0.8257	5.0334	7.2466	0.5515	0	0	0	0.7877	7.4811	0	0.1997	0	0	0	0	0	0	0	0	0	0	0	0	0	0	0	0	0	0	0	0	0	0	0	0	0	0	0	0	0	0
RPS_01	2.08	2.4	3.39	11	1.33	3873.5354	20611.645	91.001	0.8485	4.3891	1.5467	0.2943	0	0	0	0.22	1.7004	0	0	0	0	0	0	0	0	0	0	0	0	0	0	0	0	0	0	0	0	0	0	0	0	0	0	0	0	0	0	0	0
RPS_01	2.59	2.91	5.25	8.39	1.27	3909.717773	20595.695	80.686	0.6295	5.4765	5.4689	0.6461	0	0	0	0.7591	5.97	0	0.3638	0	0	0	0	0	0	0	0	0	0	0	0	0	0	0	0	0	0	0	0	0	0	0	0	0	0	0	0	0	0
RPS_01	4.67	5.12	17.12	15.63	1.2	3978.602051	20589.895	59.9968	0.7149	6.9815	14.0066	1.2451	0	0	0	1.7352	14.5764	0.2224	0.5212	0	0	0	0	0	0	0	0	0	0	0	0	0	0	0	0	0	0	0	0	0	0	0	0	0	0	0	0	0	0
RPS_01	4.03	4.4	12.77	12.59	1.19	3923.639648	20590.33	53.3426	1.8079	27.4928	0	0.3467	7.3217	8.5238	0	0	0	0.2571	0	0	0	0	0	0.9074	0	0	0	0	0	0	0	0	0	0	0	0	0	0	0	0	0	0	0	0	0	0	0	0	0
RPS_01	2.69	2.84	5.69	8.54	1.11	3905.657227	20586.85	80.8792	0.712	4.6674	6.3135	0.2166	0	0	0	0.3218	6.8895	0	0	0	0	0	0	0	0	0	0	0	0	0	0	0	0	0	0	0	0	0	0	0	0	0	0	0	0	0	0	0	0
RPS_01	3.7	4.24	10.74	12.44	1.31	3956.414063	20579.31	67.6892	0.526	5.9003	11.2725	0.8867	0	0	0	1.0069	12.458	0	0.2606	0	0	0	0	0	0	0	0	0	0	0	0	0	0	0	0	0	0	0	0	0	0	0	0	0	0	0	0	0	0
RPS_01	4.26	4.69	14.26	14.03	1.21	3941.332031	20567.71	59.0336	1.3432	23.0461	0	3.0334	3.8142	7.787	0	0	0.3149	0.6334	0	0	0	0	0	0.7764	0.2177	0	0	0	0	0	0	0	0	0	0	0	0	0	0	0	0	0	0	0	0	0	0	0	0
RPS_01	1.79	2.49	2.51	6.08	1.94	3887.674805	20567.275	92.7038	0.8794	2.9895	1.7031	0.1044	0	0	0	0.1532	1.4666	0	0	0	0	0	0	0	0	0	0	0	0	0	0	0	0	0	0	0	0	0	0	0	0	0	0	0	0	0	0	0	0
RPS_01	8.09	10.8	51.35	35.01	1.79	3877.088379	20547.0475	50.1587	1.559	26.159	2.661	0.7735	3.1357	6.7657	0	0	3.2405	0.4026	4.4441	0	0	0	0	0.7001	0	0	0	0	0	0	0	0	0	0	0	0	0	0	0	0	0	0	0	0	0	0	0	0	0
RPS_01	2.03	2.53	3.24	7.38	1.55	3854.320313	20544.365	87.4017	0.9076	4.8622	3.1209	0.2097	0	0	0	0.1808	3.317	0	0	0	0	0	0	0	0	0	0	0	0	0	0	0	0	0	0	0	0	0	0	0	0	0	0	0	0	0	0	0	0
RPS_01	5.2	6.88	21.27	18.09	1.75	3767.591064	20650.36	46.0999	1.9837	30.7173	2.105	0.2263	5.3231	11.001	0	0	0	0	0	0	0	0	0	2.5438	0	0	0	0	0	0	0	0	0	0	0	0	0	0	0	0	0	0	0	0	0	0	0	0	0
RPS_01	3.36	3.93	8.86	11.58	1.37	3816.825195	20650.36	72.9203	0	4.679	9.9455	0.7898	0	0	0	0.6719	10.8197	0	0.1737	0	0	0	0	0	0	0	0	0	0	0	0	0	0	0	0	0	0	0	0	0	0	0	0	0	0	0	0	0	0
RPS_01	3.39	4.43	9.04	11.72	1.7	3728.65332	20639.92	71.3485	1.7525	17.516	0	0	0.1866	9.1964	0	0	0	0	0	0	0	0	0	0	0	0	0	0	0	0	0	0	0	0	0	0	0	0	0	0	0	0	0	0	0	0	0	0	0
RPS_01	3.43	4.73	9.25	18.38	1.9	3797.102539	20633.83	87.9738	1.4134	3.3436	3.5807	0.1021	0	0	0	0	3.5864	0	0	0	0	0	0	0	0	0	0	0	0	0	0	0	0	0	0	0	0	0	0	0	0	0	0	0	0	0	0	0	0
RPS_01	3.35	4.95	8.83	16.64	2.18	3795.217285	20630.64	86.3815	1.0075	2.9723	4.6414	0.1339	0	0	0	0	4.8634	0	0	0	0	0	0	0	0	0	0	0	0	0	0	0	0	0	0	0	0	0	0	0	0	0	0	0	0	0	0	0	0
RPS_01	3.63	4.99	10.32	21.56	1.89	3714.151367	20628.32	84.6473	0.8526	2.9261	5.5092	0.2195	0	0	0	0	5.8453	0	0	0	0	0	0	0	0	0	0	0	0	0	0	0	0	0	0	0	0	0	0	0	0	0	0	0	0	0	0	0	0
RPS_01	2.03	2.53	3.22	7.96	1.56	3711.395996	20627.015	80.6214	0.5885	3.5103	7.3795	0.188	0	0.1109	0	0	7.6014	0	0	0	0	0	0	0	0	0	0	0	0	0	0	0	0	0	0	0	0	0	0	0	0	0	0	0	0	0	0	0	0
RPS_01	4.6	5.97	16.64	21.7	1.68	3807.979004	20623.39	80.879	1.1907	6.9667	3.7614	0.4891	0.5859	1.0702	0	0.6765	3.8571	0	0.2388	0	0	0	0	0.2848	0	0	0	0	0	0	0	0	0	0	0	0	0	0	0	0	0	0	0	0	0	0	0	0	0
RPS_01	2.87	3.5	6.49	8.97	1.48	3820.015625	20616.285	79.6371	1.297	12.4501	0	0.3043	2.6215	3.4483	0	0	0	0	0	0	0	0	0	0.2417	0	0	0	0	0	0	0	0	0	0	0	0	0	0	0	0	0	0	0	0	0	0	0	0	0
RPS_01	4.3	7.14	14.51	15.19	2.76	3729.958496	20601.1325	63.3123	2.1396	22.5423	0	0.6919	1.8443	3.64	0	0	0.1699	0.2209	4.9389	0	0	0	0	0.4999	0	0	0	0	0	0	0	0	0	0	0	0	0	0	0	0	0	0	0	0	0	0	0	0	0
RPS_01	5.89	7.37	27.21	24.16	1.57	3718.864502	20601.495	63.0146	1.2569	19.7563	2.1238	0.8423	2.4472	5.9934	0	0.3557	2.469	0.2256	0.6344	0	0	0	0	0.8807	0	0	0	0	0	0	0	0	0	0	0	0	0	0	0	0	0	0	0	0	0	0	0	0	0
RPS_01	2.88	3.57	6.53	9.69	1.54	3758.382324	20593.23	75.8937	1.0058	12.9976	0.3562	0.1246	2.2598	5.562	0	0	0	0.9813	0	0	0	0	0	0.819	0	0	0	0	0	0	0	0	0	0	0	0	0	0	0	0	0	0	0	0	0	0	0	0	0
RPS_01	4.48	5.22	15.74	16.78	1.36	3726.768066	20589.315	63.3705	0	3.3376	13.4057	0.8568	0.1188	0	0	1.6898	15.9753	0.2481	0.6541	0	0	0	0	0	0.3434	0	0	0	0	0	0	0	0	0	0	0	0	0	0	0	0	0	0	0	0	0	0	0	0
RPS_01	3.34	3.94	8.75	11.14	1.39	3747.940918	20582.935	77.3837	0.8726	4.9959	7.4355	0.5308	0	0	0	0.5546	7.9341	0	0.2928	0	0	0	0	0	0	0	0	0	0	0	0	0	0	0	0	0	0	0	0	0	0	0	0	0	0	0	0	0	0
RPS_01	3.78	4.58	11.2	11.86	1.47	3756.64209	20576.845	76.0293	0.9477	5.1837	8.1925	0.4884	0	0	0	0.5757	8.5828	0	0	0	0	0	0	0	0	0	0	0	0	0	0	0	0	0	0	0	0	0	0	0	0	0	0	0	0	0	0	0	0
RPS_01	2.26	2.46	4.02	7.23	1.18	3741.415039	20568.725	88.2127	0.9801	5.5114	1.8249	0.5727	0	0	0	0.7372	1.8259	0	0.3351	0	0	0	0	0	0	0	0	0	0	0	0	0	0	0	0	0	0	0	0	0	0	0	0	0	0	0	0	0	0
RPS_01	3.23	3.76	8.21	11	1.35	3732.713867	20565.825	77.7229	0.5026	3.0498	8.4532	0.2996	0	0	0	0.3521	9.6198	0	0	0	0	0	0	0	0	0	0	0	0	0	0	0	0	0	0	0	0	0	0	0	0	0	0	0	0	0	0	0	0
RPS_01	2.68	2.88	5.63	8.39	1.16	3722.127441	20563.94	82.3559	1.0862	4.5673	5.4533	0.4425	0	0	0	0.3558	5.739	0	0	0	0	0	0	0	0	0	0	0	0	0	0	0	0	0	0	0	0	0	0	0	0	0	0	0	0	0	0	0	0
RPS_01	3.24	3.66	8.23	10.27	1.28	3797.682617	20560.895	76.4441	0.9431	5.1444	7.648	0.623	0	0	0	0.7009	7.99	0	0.2917	0	0	0	0	0.2147	0	0	0	0	0	0	0	0	0	0	0	0	0	0	0	0	0	0	0	0	0	0	0	0	0
RPS_01	2	2.75	3.14	6.08	1.88	3782.310547	20558.865	89.0842	0.9186	5.3072	1.8555	0.3745	0	0	0	0.6153	1.6172	0	0.2275	0	0	0	0	0	0	0	0	0	0	0	0	0	0	0	0	0	0	0	0	0	0	0	0	0	0	0	0	0	0
RPS_01	2.61	3.5	5.36	10.13	1.79	3784.630859	20548.425	86.7884	0.7603	3.001	4.4746	0.1598	0	0	0	0.1417	4.6743	0	0	0	0	0	0	0	0	0	0	0	0	0	0	0	0	0	0	0	0	0	0	0	0	0	0	0	0	0	0	0	0
RPS_01	2.56	2.98	5.13	8.1	1.36	3826.976563	20542.48	81.3141	0.9603	4.5574	6.2075	0.2945	0	0	0	0.1893	6.477	0	0	0	0	0	0	0	0	0	0	0	0	0	0	0	0	0	0	0	0	0	0	0	0	0	0	0	0	0	0	0	0
RPS_01	2.43	3.28	4.63	9.84	1.83	3621.838867	20651.81	87.4308	0.9897	5.2059	2.7608	0.3461	0	0	0	0.4941	2.5761	0	0.1964	0	0	0	0	0	0	0	0	0	0	0	0	0	0	0	0	0	0	0	0	0	0	0	0	0	0	0	0	0	0
RPS_01	3.24	4.23	8.27	14.61	1.7	3595.227783	20650.5775	75.8923	0	4.3806	6.5278	0.4605	0.6746	1.9851	0	0.7417	8.7752	0.5623	0	0	0	0	0	0	0	0	0	0	0	0	0	0	0	0	0	0	0	0	0	0	0	0	0	0	0	0	0	0	0
RPS_01	3.09	4	7.49	15.19	1.68	3620.316162	20645.865	83.1411	0.9284	3.057	6.1298	0.1785	0	0	0	0.1483	6.4169	0	0	0	0	0	0	0	0	0	0	0	0	0	0	0	0	0	0	0	0	0	0	0	0	0	0	0	0	0	0	0	0
RPS_01	4.25	5.94	14.21	15.63	1.95	3678.976563	20641.5875	79.4414	0.5965	4.7423	7.2343	0.2702	0	0	0	0.2004	7.5149	0	0	0	0	0	0	0	0	0	0	0	0	0	0	0	0	0	0	0	0	0	0	0	0	0	0	0	0	0	0	0	0
RPS_01	5.07	5.79	20.16	17.22	1.31	3657.151123	20639.5575	62.6952	0	5.394	14.2909	0.8756	0	0	0	0.9261	15.0685	0.1842	0.3291	0	0	0	0	0	0.2363	0	0	0	0	0	0	0	0	0	0	0	0	0	0	0	0	0	0	0	0	0	0	0	0
RPS_01	1.99	2.25	3.1	6.8	1.28	3620.461182	20629.6975	88.5774	0.7948	4.9699	2.4476	0.3715	0	0	0	0.1987	2.6401	0	0	0	0	0	0	0	0	0	0	0	0	0	0	0	0	0	0	0	0	0	0	0	0	0	0	0	0	0	0	0	0
RPS_01	3.97	5.23	12.39	12.59	1.73	3559.480469	20627.885	68.365	0.5811	7.4389	9.8571	1.0724	0	0	0	1.175	10.9407	0.1863	0.3836	0	0	0	0	0	0	0	0	0	0	0	0	0	0	0	0	0	0	0	0	0	0	0	0	0	0	0	0	0	0
RPS_01	3.49	4.38	9.59	11.58	1.57	3652.583008	20622.375	75.6921	1.7898	14.4693	0	0.1593	0.7147	1.2819	0	0.1396	0.3035	0	5.2107	0	0	0	0	0.2391	0	0	0	0	0	0	0	0	0	0	0	0	0	0	0	0	0	0	0	0	0	0	0	0	0
RPS_01	1.92	2.5	2.91	7.23	1.68	3583.69873	20613.675	92.0014	1.1295	2.7544	1.9524	0	0	0	0	0	2.1623	0	0	0	0	0	0	0	0	0	0	0	0	0	0	0	0	0	0	0	0	0	0	0	0	0	0	0	0	0	0	0	0
RPS_01	5.1	5.63	20.45	17.36	1.22	3598.200684	20610.92	56.4565	1.1957	21.1695	3.2	0.4971	4.8113	7.2697	0	0.3075	3.3425	0.4963	0.1978	0	0	0	0	1.0561	0	0	0	0	0	0	0	0	0	0	0	0	0	0	0	0	0	0	0	0	0	0	0	0	0
RPS_01	3.71	4.07	10.8	11.43	1.21	3690.433105	20606.715	70.3081	0.5821	5.6901	9.9949	0.9908	0	0	0	1.0662	10.6479	0	0.4866	0	0	0	0	0	0.2333	0	0	0	0	0	0	0	0	0	0	0	0	0	0	0	0	0	0	0	0	0	0	0	0
RPS_01	3.57	3.91	9.99	12.01	1.2	3577.897949	20605.12	76.5855	0.5721	4.5556	8.4644	0.5736	0	0	0	0.4949	8.7539	0	0	0	0	0	0	0	0	0	0	0	0	0	0	0	0	0	0	0	0	0	0	0	0	0	0	0	0	0	0	0	0
RPS_01	2.5	2.81	4.92	8.1	1.26	3663.459473	20603.96	88.2594	0.9188	4.9179	2.4246	0.3436	0	0	0	0.4951	2.6406	0	0	0	0	0	0	0	0	0	0	0	0	0	0	0	0	0	0	0	0	0	0	0	0	0	0	0	0	0	0	0	0
RPS_01	3.35	3.8	8.83	10.56	1.28	3569.921875	20588.155	76.1019	0.5555	3.5565	9.0178	0.4688	0	0	0	0.8705	9.1631	0	0.266	0	0	0	0	0	0	0	0	0	0	0	0	0	0	0	0	0	0	0	0	0	0	0	0	0	0	0	0	0	0
RPS_01	3.49	3.93	9.59	11.86	1.27	3561.365723	20581.34	70.1559	0.6372	5.9206	10.2237	0.7003	0.1963	0.3002	0	0.9879	10.1046	0.1708	0.3967	0	0	0	0.2058	0	0	0	0	0	0	0	0	0	0	0	0	0	0	0	0	0	0	0	0	0	0	0	0	0	0
RPS_01	5.14	6.55	20.77	16.93	1.62	3639.966309	20576.9175	44.7868	1.499	34.3728	0	0.3152	7.2889	8.6087	0	0	0	0.2218	0.1937	0.1744	0	0	0	2.296	0.2426	0	0	0	0	0	0	0	0	0	0	0	0	0	0	0	0	0	0	0	0	0	0	0	0
RPS_01	4.84	7.44	18.4	28.79	2.36	3680.571777	20568.7975	65.2908	0	5.1375	13.7368	0.7287	0	0	0	0.7282	14.2138	0	0.1642	0	0	0	0	0	0	0	0	0	0	0	0	0	0	0	0	0	0	0	0	0	0	0	0	0	0	0	0	0	0
RPS_01	5.03	5.37	19.89	16.78	1.14	3677.816406	20558.14	61.2496	0	6.0668	14.4333	1.161	0	0	0	1.4232	15.2031	0	0.4631	0	0	0	0	0	0	0	0	0	0	0	0	0	0	0	0	0	0	0	0	0	0	0	0	0	0	0	0	0	0
RPS_01	2.56	2.85	5.13	8.1	1.24	3657.368652	20559.01	82.1518	0.7884	4.7121	5.6587	0.3069	0	0	0	0.4728	5.9093	0	0	0	0	0	0	0	0	0	0	0	0	0	0	0	0	0	0	0	0	0	0	0	0	0	0	0	0	0	0	0	0
RPS_01	2.48	2.72	4.84	7.81	1.2	3702.179688	20555.385	76.4538	1.2263	8.5217	5.4986	1.1135	0	0	0	1.1353	5.6901	0	0.3607	0	0	0	0	0	0	0	0	0	0	0	0	0	0	0	0	0	0	0	0	0	0	0	0	0	0	0	0	0	0
RPS_01	0.92	1.33	0.67	3.33	2.09	3634.310547	20547.6275	89.8248	0.9705	4.6109	1.4293	0.771	0	0	0	0	2.2223	0	0.1712	0	0	0	0	0	0	0	0	0	0	0	0	0	0	0	0	0	0	0	0	0	0	0	0	0	0	0	0	0	0
RPS_01	3.84	4.38	11.6	12.59	1.3	3653.598145	20546.105	63.9564	0.5585	6.7753	12.1595	1.1285	0	0	0	1.6238	13.0641	0.1789	0.555	0	0	0	0	0	0	0	0	0	0	0	0	0	0	0	0	0	0	0	0	0	0	0	0	0	0	0	0	0	0
RPS_01	4.05	4.9	12.9	12.59	1.46	3636.050781	20545.38	66.9648	0.6013	4.3146	12.0006	0.4034	0	0	0	1.3957	12.9867	0.254	1.0789	0	0	0	0	0	0	0	0	0	0	0	0	0	0	0	0	0	0	0	0	0	0	0	0	0	0	0	0	0	0
RPS_01	2.08	2.86	3.39	6.66	1.9	3595.300293	20541.32	85.0268	0.6752	5.5063	3.0956	0.563	0	0	0	1.0371	3.6559	0	0.4402	0	0	0	0	0	0	0	0	0	0	0	0	0	0	0	0	0	0	0	0	0	0	0	0	0	0	0	0	0	0
RPS_01	2.79	3.11	6.11	9.26	1.24	3544.17334	20648.91	84.2962	1.0098	2.9885	5.7039	0.1206	0	0	0	0	5.881	0	0	0	0	0	0	0	0	0	0	0	0	0	0	0	0	0	0	0	0	0	0	0	0	0	0	0	0	0	0	0	0
RPS_01	5.29	6.33	22	20.26	1.43	3516.039551	20636.9475	67.2721	0.7109	7.0941	10.7542	1.1312	0	0	0	1.3433	10.9702	0.207	0.5171	0	0	0	0	0	0	0	0	0	0	0	0	0	0	0	0	0	0	0	0	0	0	0	0	0	0	0	0	0	0
RPS_01	2.02	3.65	3.2	8.25	3.27	3512.849121	20637.89	88.2115	0.58	3.0894	3.7729	0.1371	0	0	0	0	4.2092	0	0	0	0	0	0	0	0	0	0	0	0	0	0	0	0	0	0	0	0	0	0	0	0	0	0	0	0	0	0	0	0
RPS_01	4.41	5.38	15.28	16.06	1.49	3534.89209	20636.875	60.6892	1.1081	19.3707	3.9759	0.5276	3.8024	4.9638	0	0.4219	4.0348	0.1924	0.2998	0	0	0	0	0.6134	0	0	0	0	0	0	0	0	0	0	0	0	0	0	0	0	0	0	0	0	0	0	0	0	0
RPS_01	4.45	4.85	15.53	14.9	1.19	3421.196777	20616.14	64.0024	0.9521	5.3206	13.2481	1.1234	0	0	0	1.2036	13.7386	0	0.4112	0	0	0	0	0	0	0	0	0	0	0	0	0	0	0	0	0	0	0	0	0	0	0	0	0	0	0	0	0	0
RPS_01	3.07	3.41	7.39	10.13	1.23	3485.585449	20612.515	69.6238	0	4.7386	11.6345	0.6763	0	0	0	0.6895	12.4542	0	0.1831	0	0	0	0	0	0	0	0	0	0	0	0	0	0	0	0	0	0	0	0	0	0	0	0	0	0	0	0	0	0
RPS_01	3.88	4.88	11.85	16.78	1.58	3541.272949	20609.47	79.913	0.9911	5.6625	5.8725	0.395	0	0	0	0.4718	6.4072	0	0.2869	0	0	0	0	0	0	0	0	0	0	0	0	0	0	0	0	0	0	0	0	0	0	0	0	0	0	0	0	0	0
RPS_01	1.22	1.49	1.17	3.47	1.49	3497.477051	20593.0125	92.1202	0.9487	4.1209	1.2172	0.1524	0	0	0	0.1395	1.3011	0	0	0	0	0	0	0	0	0	0	0	0	0	0	0	0	0	0	0	0	0	0	0	0	0	0	0	0	0	0	0	0
RPS_01	2.66	3.48	5.57	8.68	1.71	3417.28125	20565.1	82.2652	0.9276	6.9883	3.7721	0.6271	0	0	0	0.8828	4.0994	0	0.4375	0	0	0	0	0	0	0	0	0	0	0	0	0	0	0	0	0	0	0	0	0	0	0	0	0	0	0	0	0	0
RPS_01	1.8	2.07	2.53	5.64	1.33	3444.544922	20565.535	86.6269	0.8934	4.4603	3.5084	0.3403	0	0	0	0.3264	3.8443	0	0	0	0	0	0	0	0	0	0	0	0	0	0	0	0	0	0	0	0	0	0	0	0	0	0	0	0	0	0	0	0
RPS_01	4.24	5.31	14.09	15.34	1.57	3515.894531	20558.285	68.4846	0.914	9.9007	7.2279	0.799	1.6232	2.0114	0	0.9729	7.2454	0	0.4586	0	0	0	0	0.3623	0	0	0	0	0	0	0	0	0	0	0	0	0	0	0	0	0	0	0	0	0	0	0	0	0
RPS_01	2.15	2.67	3.62	10.27	1.54	3470.793457	20556.255	89.3049	1.0422	6.0997	1.1326	0.4667	0	0	0	0.7384	0.94	0	0.2754	0	0	0	0	0	0	0	0	0	0	0	0	0	0	0	0	0	0	0	0	0	0	0	0	0	0	0	0	0	0
RPS_01	1.95	2.36	2.97	6.51	1.47	3464.557617	20547.12	87.5571	1.0405	5.7996	2.0319	0.5419	0	0	0	0.7593	1.9802	0	0.2894	0	0	0	0	0	0	0	0	0	0	0	0	0	0	0	0	0	0	0	0	0	0	0	0	0	0	0	0	0	0
RPS_01	4.91	5.91	18.9	18.81	1.45	3489.428467	20763.91	55.2109	0.8631	17.6156	7.5135	1.4394	0.4787	6.3359	0	1.0227	8.5864	0.215	0.3087	0	0	0	0	0.4101	0	0	0	0	0	0	0	0	0	0	0	0	0	0	0	0	0	0	0	0	0	0	0	0	0
RPS_01	4.26	4.77	14.28	13.31	1.25	3462.744873	20763.765	66.2322	0.5061	5.6018	12.802	0.6648	0	0	0	0.5421	13.4308	0	0.2203	0	0	0	0	0	0	0	0	0	0	0	0	0	0	0	0	0	0	0	0	0	0	0	0	0	0	0	0	0	0
RPS_01	3.77	4.28	11.16	12.88	1.29	3480.219727	20763.185	70.6637	0.6575	5.7282	10.1722	0.7856	0	0	0	0.7308	10.5047	0.1718	0.3412	0	0	0	0	0	0.2444	0	0	0	0	0	0	0	0	0	0	0	0	0	0	0	0	0	0	0	0	0	0	0	0
RPS_01	5.31	6.57	22.17	22.43	1.53	3421.051758	20755.7175	64.1778	1.36	15.1839	5.3583	0.9161	1.5723	3.549	0	0.3853	6.2371	0	0.4545	0	0	0	0	0.8058	0	0	0	0	0	0	0	0	0	0	0	0	0	0	0	0	0	0	0	0	0	0	0	0	0
RPS_01	2.75	3.19	5.92	9.98	1.35	3455.856445	20756.95	76.2705	0.7779	5.6008	7.5522	0.7423	0	0	0	0.6765	8.1859	0	0.194	0	0	0	0	0	0	0	0	0	0	0	0	0	0	0	0	0	0	0	0	0	0	0	0	0	0	0	0	0	0
RPS_01	3.44	3.94	9.29	11.58	1.31	3487.905762	20747.96	73.2825	0	3.8986	10.59	0.5805	0.1013	0	0	0.5741	10.7867	0	0.1864	0	0	0	0	0	0	0	0	0	0	0	0	0	0	0	0	0	0	0	0	0	0	0	0	0	0	0	0	0	0
RPS_01	5.57	7.9	24.37	20.98	2.01	3526.625977	20738.3175	63.8566	0.8952	12.7293	6.6138	1.0649	1.6566	3.5354	0	0.4004	7.8055	0.4578	0.1662	0	0	0	0	0.8183	0	0	0	0	0	0	0	0	0	0	0	0	0	0	0	0	0	0	0	0	0	0	0	0	0
RPS_01	6.29	10.08	31.07	26.04	2.57	3417.861328	20735.5625	60.6146	1.3532	19.3934	3.4759	0.2299	2.762	7.3393	0	0	3.0285	1.8033	0	0	0	0	0	0	0	0	0	0	0	0	0	0	0	0	0	0	0	0	0	0	0	0	0	0	0	0	0	0	0
RPS_01	2.1	2.53	3.48	6.95	1.44	3480.219727	20729.98	88.0142	0.9557	5.0387	2.241	0.4648	0	0	0	0.5349	2.5844	0	0.1662	0	0	0	0	0	0	0	0	0	0	0	0	0	0	0	0	0	0	0	0	0	0	0	0	0	0	0	0	0	0
RPS_01	1.92	2.25	2.91	6.22	1.36	3554.179688	20728.385	89.2672	1.4655	3.8207	2.4051	0.212	0	0	0	0.251	2.5785	0	0	0	0	0	0	0	0	0	0	0	0	0	0	0	0	0	0	0	0	0	0	0	0	0	0	0	0	0	0	0	0
RPS_01	3.52	3.79	9.73	11	1.16	3476.739258	20726.065	61.3602	1.7898	22.6673	0.676	0.2673	2.7005	9.4451	0	0	0	0.6083	0	0	0	0	0	0.4854	0	0	0	0	0	0	0	0	0	0	0	0	0	0	0	0	0	0	0	0	0	0	0	0	0
RPS_01	2.15	3.05	3.62	7.67	2.02	3461.077148	20725.195	86.0306	0.6232	4.5593	3.5565	0.5569	0	0	0	0.6285	3.7251	0	0.32	0	0	0	0	0	0	0	0	0	0	0	0	0	0	0	0	0	0	0	0	0	0	0	0	0	0	0	0	0	0
RPS_01	2.9	3.26	6.59	9.26	1.27	3417.13623	20716.06	78.7701	0.8987	5.9716	5.9449	0.8621	0	0	0	0.9811	6.2681	0	0.3033	0	0	0	0	0	0	0	0	0	0	0	0	0	0	0	0	0	0	0	0	0	0	0	0	0	0	0	0	0	0
RPS_01	5.07	6.21	20.2	18.38	1.5	3449.910645	20681.9125	60.8268	2.0473	24.4868	0	0.196	4.9958	6.6962	0	0	0	0.1551	0	0	0	0	0	0.5961	0	0	0	0	0	0	0	0	0	0	0	0	0	0	0	0	0	0	0	0	0	0	0	0	0
RPS_01	5	7.69	19.62	23.73	2.37	3512.559082	20669.1525	65.4216	0	7.5121	10.8121	1.4817	0	0.1651	0	1.7428	11.7367	0.249	0.6129	0	0	0	0	0.2659	0	0	0	0	0	0	0	0	0	0	0	0	0	0	0	0	0	0	0	0	0	0	0	0	0
RPS_01	2.82	3.48	6.24	9.12	1.52	3443.529785	20665.89	79.3951	0.8702	5.2462	6.0059	0.7672	0	0	0	0.7829	6.583	0	0.3496	0	0	0	0	0	0	0	0	0	0	0	0	0	0	0	0	0	0	0	0	0	0	0	0	0	0	0	0	0	0
RPS_01	2.78	3.07	6.07	8.83	1.22	3429.317871	20664.295	77.2845	0	3.1783	8.4935	0.5058	0	0	0	0.629	9.9089	0	0	0	0	0	0	0	0	0	0	0	0	0	0	0	0	0	0	0	0	0	0	0	0	0	0	0	0	0	0	0	0
RPS_01	2.8	3.37	6.15	9.98	1.45	3516.474609	20868.76	84.0384	0.8104	4.827	4.6087	0.4372	0	0	0	0.3513	4.927	0	0	0	0	0	0	0	0	0	0	0	0	0	0	0	0	0	0	0	0	0	0	0	0	0	0	0	0	0	0	0	0
RPS_01	3.27	3.76	8.37	10.85	1.33	3542.868164	20866.295	74.7624	0.5258	5.669	7.7794	0.7871	0	0	0	1.1863	8.9689	0	0.3212	0	0	0	0	0	0	0	0	0	0	0	0	0	0	0	0	0	0	0	0	0	0	0	0	0	0	0	0	0	0
RPS_01	3.46	4.66	9.4	14.76	1.81	3493.489014	20858.03	80.4987	0.8478	5.9921	4.9505	0.5189	0	0	0	0.7832	6.0622	0	0.3465	0	0	0	0	0	0	0	0	0	0	0	0	0	0	0	0	0	0	0	0	0	0	0	0	0	0	0	0	0	0
RPS_01	3.2	4.79	8.04	12.59	2.24	3491.38623	20856.58	73.3937	0.516	4.8433	9.713	0.9922	0	0	0	0.2194	10.3222	0	0	0	0	0	0	0	0	0	0	0	0	0	0	0	0	0	0	0	0	0	0	0	0	0	0	0	0	0	0	0	0
RPS_01	2.61	2.93	5.34	8.39	1.26	3503.712891	20853.6075	83.9293	0.855	5.9913	3.1466	0.9672	0	0	0	0.9909	3.6838	0	0.436	0	0	0	0	0	0	0	0	0	0	0	0	0	0	0	0	0	0	0	0	0	0	0	0	0	0	0	0	0	0
RPS_01	6.32	8.72	31.4	24.02	1.9	3459.481934	20847.59	52.3328	1.3751	23.885	1.5839	0.2484	0.4953	17.2232	0	0.3069	2.3194	0	0	0	0	0	0	0.2301	0	0	0	0	0	0	0	0	0	0	0	0	0	0	0	0	0	0	0	0	0	0	0	0	0
RPS_01	5.06	6.54	20.1	22.14	1.67	3527.351074	20844.3275	54.8453	1.6957	22.7946	3.7696	0.6451	1.613	9.0485	0	0.5302	3.8273	0.4374	0.2827	0.1988	0	0	0	0.3118	0	0	0	0	0	0	0	0	0	0	0	0	0	0	0	0	0	0	0	0	0	0	0	0	0
RPS_01	1.99	2.36	3.1	6.66	1.41	3483.700195	20836.86	87.7295	0.9265	3.8217	3.4493	0.2869	0	0	0	0.2513	3.5348	0	0	0	0	0	0	0	0	0	0	0	0	0	0	0	0	0	0	0	0	0	0	0	0	0	0	0	0	0	0	0	0
RPS_01	3.09	3.52	7.52	10.42	1.3	3453.971191	20824.1	68.7747	1.8462	18.4935	0	0.5879	1.4046	6.322	0	0	0	0.2605	0	0	0	0	0	2.3106	0	0	0	0	0	0	0	0	0	0	0	0	0	0	0	0	0	0	0	0	0	0	0	0	0
RPS_01	4.99	6.81	19.53	18.52	1.87	3536.777344	20820.6925	52.9054	1.8213	28.4963	0.2234	0.1948	7.6975	7.6968	0	0	0	0.619	0	0	0	0	0	0.3455	0	0	0	0	0	0	0	0	0	0	0	0	0	0	0	0	0	0	0	0	0	0	0	0	0
RPS_01	2.5	3.37	4.9	7.96	1.82	3496.026855	20813.805	86.9785	0.7438	4.0956	3.6373	0.3116	0	0	0	0.3671	3.8661	0	0	0	0	0	0	0	0	0	0	0	0	0	0	0	0	0	0	0	0	0	0	0	0	0	0	0	0	0	0	0	0
RPS_01	5.33	6.36	22.32	17.65	1.42	3454.841309	20811.2675	58.09	1.0341	15.1471	8.2099	0.6248	2.8735	4.2491	0	0.4579	8.0119	0.1763	0.2861	0	0	0	0	0.8395	0	0	0	0	0	0	0	0	0	0	0	0	0	0	0	0	0	0	0	0	0	0	0	0	0
RPS_01	5.74	6.67	25.9	18.95	1.35	3547.943848	20809.0925	55.4251	1.9149	27.6872	0.1151	0.128	6.3648	6.6028	0	0	0	0.2111	0	0.1967	0	0	0	1.0889	0.2655	0	0	0	0	0	0	0	0	0	0	0	0	0	0	0	0	0	0	0	0	0	0	0	0
RPS_01	4.12	5.14	13.34	17.51	1.55	3489.500977	20804.235	80.8406	0.8435	6.6374	4.836	0.6902	0	0	0	0.7928	5.0884	0	0.271	0	0	0	0	0	0	0	0	0	0	0	0	0	0	0	0	0	0	0	0	0	0	0	0	0	0	0	0	0	0
RPS_01	4.09	4.79	13.17	14.47	1.37	3539.677734	20802.205	72.7506	0.5887	6.1238	8.5117	1.0053	0	0	0	0.9997	9.4454	0.1882	0.3865	0	0	0	0	0	0	0	0	0	0	0	0	0	0	0	0	0	0	0	0	0	0	0	0	0	0	0	0	0	0
RPS_01	3.98	4.71	12.44	13.89	1.4	3533.876953	20792.635	75.6938	0	4.4901	8.0963	0.7629	0	0	0	1.0405	9.5636	0	0.3529	0	0	0	0	0	0	0	0	0	0	0	0	0	0	0	0	0	0	0	0	0	0	0	0	0	0	0	0	0	0
RPS_01	2.19	2.61	3.77	7.23	1.42	3414.815918	20788.72	85.656	0.9062	4.1108	4.1991	0.3513	0	0	0	0.3565	4.4201	0	0	0	0	0	0	0	0	0	0	0	0	0	0	0	0	0	0	0	0	0	0	0	0	0	0	0	0	0	0	0	0
RPS_01	3.49	4.35	9.55	17.8	1.56	3528.076172	20785.095	78.0697	0	5.9098	6.6147	0.8195	0	0	0	0.7743	7.2527	0	0.2838	0	0	0	0	0	0.2756	0	0	0	0	0	0	0	0	0	0	0	0	0	0	0	0	0	0	0	0	0	0	0	0
RPS_01	5.1	5.76	20.45	16.93	1.27	3429.317871	20779.295	56.3735	1.444	23.3616	2.3165	0.8109	3.3998	7.3002	0	0	2.6795	0.4992	0.3217	0	0	0	0	1.2083	0.2849	0	0	0	0	0	0	0	0	0	0	0	0	0	0	0	0	0	0	0	0	0	0	0	0
RPS_02	2.03	2.29	3.22	6.51	1.27	4144.411621	7619.97	85.6186	0.788	4.8707	3.5816	0.6524	0	0	0	0.381	4.1076	0	0	0	0	0	0	0	0	0	0	0	0	0	0	0	0	0	0	0	0	0	0	0	0	0	0	0	0	0	0	0	0
RPS_02	5.16	6.28	20.91	21.27	1.48	4058.415039	7616.78	57.0855	1.6826	24.8936	1.9125	0.5414	4.1733	8.4354	0	0	0.3645	0	0.523	0	0	0	0	0.3881	0	0	0	0	0	0	0	0	0	0	0	0	0	0	0	0	0	0	0	0	0	0	0	0	0
RPS_02	3.86	4.91	11.72	13.46	1.62	4106.343994	7614.9675	59.3347	1.6836	24.2905	0	0.2711	2.5062	11.018	0	0	0	0.2973	0	0	0	0	0	0.5986	0	0	0	0	0	0	0	0	0	0	0	0	0	0	0	0	0	0	0	0	0	0	0	0	0
RPS_02	3.6	4.06	10.15	11.72	1.28	4144.991699	7608.08	66.6761	1.5904	19.6239	0.1337	0.1045	5.1113	5.4606	0	0	0	1.0271	0	0	0	0	0	0.2724	0	0	0	0	0	0	0	0	0	0	0	0	0	0	0	0	0	0	0	0	0	0	0	0	0
RPS_02	3.71	4.35	10.78	13.17	1.38	4033.689209	7603.875	67.9121	0.5316	5.8343	11.2167	0.923	0	0	0	0.8685	11.9514	0.1689	0.3655	0	0	0	0	0	0.2279	0	0	0	0	0	0	0	0	0	0	0	0	0	0	0	0	0	0	0	0	0	0	0	0
RPS_02	4.68	5.69	17.17	15.48	1.48	4105.111328	7602.715	53.4271	0	5.1701	18.8711	0.9239	0	0.1328	0	0.9223	19.9737	0.1927	0.3862	0	0	0	0	0	0	0	0	0	0	0	0	0	0	0	0	0	0	0	0	0	0	0	0	0	0	0	0	0	0
RPS_02	5.83	7.79	26.73	21.7	1.78	4123.963867	7598.5825	56.676	0	4.2003	18.8664	0.5401	0	0	0	0.5543	18.9831	0	0.1799	0	0	0	0	0	0	0	0	0	0	0	0	0	0	0	0	0	0	0	0	0	0	0	0	0	0	0	0	0	0
RPS_02	5.92	8.67	27.53	22.14	2.14	4031.151367	7579.4425	52.2807	2.2657	29.6771	0.3282	0.4867	4.3323	8.1109	0	0	0	0	0.8511	0	0	0	0	1.6674	0	0	0	0	0	0	0	0	0	0	0	0	0	0	0	0	0	0	0	0	0	0	0	0	0
RPS_02	4.19	5.76	13.82	16.35	1.89	4097.135254	7578.79	65.7073	1.6824	19.7059	0	0.3433	0.9323	1.6628	0	0	0.3137	0.1888	9.2392	0	0	0	0	0.2243	0	0	0	0	0	0	0	0	0	0	0	0	0	0	0	0	0	0	0	0	0	0	0	0	0
RPS_02	3.69	4.24	10.7	11.86	1.32	4082.488281	7577.34	62.2709	0	7.4248	13.6006	1.3733	0	0	0	1.1138	13.7655	0	0.4511	0	0	0	0	0	0	0	0	0	0	0	0	0	0	0	0	0	0	0	0	0	0	0	0	0	0	0	0	0	0
RPS_02	1.85	2.07	2.7	6.08	1.25	4040.142578	7577.34	88.8096	0.8423	3.1211	3.3872	0.1347	0	0	0	0.1662	3.5389	0	0	0	0	0	0	0	0	0	0	0	0	0	0	0	0	0	0	0	0	0	0	0	0	0	0	0	0	0	0	0	0
RPS_02	3.68	4.67	10.66	13.75	1.61	4133.390137	7566.175	68.0605	0.7082	7.9702	9.5107	1.1078	0	0.1612	0	1.2261	10.1613	0.2756	0.5251	0	0	0	0	0	0.2933	0	0	0	0	0	0	0	0	0	0	0	0	0	0	0	0	0	0	0	0	0	0	0	0
RPS_02	1.52	1.75	1.82	4.63	1.32	4095.467529	7566.32	88.0008	0.9314	5.3775	2.3754	0.4973	0	0	0	0.1366	2.681	0	0	0	0	0	0	0	0	0	0	0	0	0	0	0	0	0	0	0	0	0	0	0	0	0	0	0	0	0	0	0	0
RPS_02	1.29	1.69	1.3	4.49	1.72	4096.990234	7558.2725	92.2654	0	4.0017	1.6891	0.1763	0	0	0	0.3847	1.2528	0	0.23	0	0	0	0	0	0	0	0	0	0	0	0	0	0	0	0	0	0	0	0	0	0	0	0	0	0	0	0	0	0
RPS_02	1.88	2.21	2.78	6.22	1.38	4046.378418	7543.12	87.5975	0.861	3.689	3.6609	0.1924	0	0	0	0.1897	3.8095	0	0	0	0	0	0	0	0	0	0	0	0	0	0	0	0	0	0	0	0	0	0	0	0	0	0	0	0	0	0	0	0
RPS_02	1.73	2.25	2.34	6.08	1.69	4030.28125	7542.395	90.4125	0.6669	3.723	2.177	0.3168	0	0	0	0.3948	2.1081	0	0.2008	0	0	0	0	0	0	0	0	0	0	0	0	0	0	0	0	0	0	0	0	0	0	0	0	0	0	0	0	0	0
RPS_02	4.38	5.44	15.05	15.34	1.54	4087.563965	7534.42	54.6968	0	8.9522	15.4389	1.7901	0	0	0	1.2462	17.1795	0.2132	0.4833	0	0	0	0	0	0	0	0	0	0	0	0	0	0	0	0	0	0	0	0	0	0	0	0	0	0	0	0	0	0
RPS_02	3.42	4.09	9.17	12.88	1.43	4098.875488	7518.905	73.1078	0.6457	4.1885	10.8432	0.2603	0	0	0	0	10.9546	0	0	0	0	0	0	0	0	0	0	0	0	0	0	0	0	0	0	0	0	0	0	0	0	0	0	0	0	0	0	0	0
RPS_02	1.88	2.2	2.76	6.08	1.38	4127.444336	7515.86	88.3832	1.1644	5.1237	2.534	0.3078	0	0	0	0.1595	2.3274	0	0	0	0	0	0	0	0	0	0	0	0	0	0	0	0	0	0	0	0	0	0	0	0	0	0	0	0	0	0	0	0
RPS_02	2.52	4.53	5	12.59	3.22	4103.081055	7514.7	82.0208	1.0783	6.856	4.3645	0.8051	0	0	0	0.2404	4.6349	0	0	0	0	0	0	0	0	0	0	0	0	0	0	0	0	0	0	0	0	0	0	0	0	0	0	0	0	0	0	0	0
RPS_02	1.28	1.51	1.28	4.49	1.4	4065.811035	7511.5825	89.8991	0.777	5.7413	0.6707	0.6503	0	0	0	1.0869	0.6834	0	0.4914	0	0	0	0	0	0	0	0	0	0	0	0	0	0	0	0	0	0	0	0	0	0	0	0	0	0	0	0	0	0
RPS_02	1.15	1.51	1.05	3.76	1.71	4028.976074	7511.5825	92.3335	1.0275	3.0441	1.7607	0	0	0	0	0	1.8341	0	0	0	0	0	0	0	0	0	0	0	0	0	0	0	0	0	0	0	0	0	0	0	0	0	0	0	0	0	0	0	0
RPS_02	2.29	2.79	4.1	7.38	1.49	4188.287598	7620.115	85.3773	1.0245	3.3961	4.8736	0.1425	0	0	0	0.2043	4.9817	0	0	0	0	0	0	0	0	0	0	0	0	0	0	0	0	0	0	0	0	0	0	0	0	0	0	0	0	0	0	0	0
RPS_02	5.17	6.34	20.96	18.52	1.51	4306.768555	7618.1575	51.5085	1.799	29.2352	0	0.594	5.7427	8.6939	0	0	0	0.365	0.3933	0.2071	0	0	0	1.4613	0	0	0	0	0	0	0	0	0	0	0	0	0	0	0	0	0	0	0	0	0	0	0	0	0
RPS_02	2.06	2.43	3.33	6.66	1.39	4238.754395	7608.805	88.4835	1.0883	3.8289	3.1363	0.1811	0	0	0	0.1751	3.1069	0	0	0	0	0	0	0	0	0	0	0	0	0	0	0	0	0	0	0	0	0	0	0	0	0	0	0	0	0	0	0	0
RPS_02	5.37	7.18	22.61	20.98	1.79	4228.458008	7602.7875	62.1559	0.7328	8.5502	11.7259	1.0557	0	0.1553	0	1.7443	12.3895	0.2959	0.9229	0	0	0	0	0	0.2717	0	0	0	0	0	0	0	0	0	0	0	0	0	0	0	0	0	0	0	0	0	0	0	0
RPS_02	1.9	2.07	2.85	6.08	1.18	4244.990234	7586.62	87.0719	1.2109	5.7181	2.1447	0.8202	0	0	0	0.4226	2.6116	0	0	0	0	0	0	0	0	0	0	0	0	0	0	0	0	0	0	0	0	0	0	0	0	0	0	0	0	0	0	0	0
RPS_02	3.74	4.39	10.97	14.61	1.38	4248.180664	7582.705	79.1511	0.9443	4.3151	6.7388	0.4106	0	0	0	0.5502	7.6622	0	0.2277	0	0	0	0	0	0	0	0	0	0	0	0	0	0	0	0	0	0	0	0	0	0	0	0	0	0	0	0	0	0
RPS_02	3.26	4	8.33	11.29	1.51	4298.212402	7560.23	73.8109	0.5111	4.2151	9.5952	0.4776	0	0	0	0.7728	10.2609	0	0.3564	0	0	0	0	0	0	0	0	0	0	0	0	0	0	0	0	0	0	0	0	0	0	0	0	0	0	0	0	0	0
RPS_02	4.54	5.4	16.16	15.63	1.42	4266.018066	7553.705	57.6797	1.5793	23.5948	0.985	0.1624	4.4844	9.443	0	0.1482	0	0.946	0	0	0	0	0	0.9772	0	0	0	0	0	0	0	0	0	0	0	0	0	0	0	0	0	0	0	0	0	0	0	0	0
RPS_02	4.97	5.9	19.41	16.49	1.41	4177.991211	7546.0925	43.4247	2.0395	32.3963	0.1435	0	1.8091	19.9544	0	0	0	0	0	0	0	0	0	0.2324	0	0	0	0	0	0	0	0	0	0	0	0	0	0	0	0	0	0	0	0	0	0	0	0	0
RPS_02	3.23	3.79	8.21	10.85	1.37	4235.563965	7541.525	64.7792	1.5536	20.2158	0	0.9602	3.4654	7.1358	0	0	0.1767	0.4164	0.2944	0	0	0	0	1.0024	0	0	0	0	0	0	0	0	0	0	0	0	0	0	0	0	0	0	0	0	0	0	0	0	0
RPS_02	2.77	3.44	6.01	9.26	1.55	4274.13916	7540.655	85.5237	1.1387	3.7282	4.6318	0.1921	0	0	0	0.2333	4.5522	0	0	0	0	0	0	0	0	0	0	0	0	0	0	0	0	0	0	0	0	0	0	0	0	0	0	0	0	0	0	0	0
RPS_02	3.52	5.18	9.76	23.29	2.16	4214.826172	7535.435	88.8729	1.2725	6.3418	1.3241	0.2711	0	0	0	0.4035	1.1619	0.1628	0.1892	0	0	0	0	0	0	0	0	0	0	0	0	0	0	0	0	0	0	0	0	0	0	0	0	0	0	0	0	0	0
RPS_02	3.3	4.22	8.54	10.56	1.64	4289.51123	7535.725	64.9961	1.6409	19.7822	0	0	0.4905	12.7825	0	0	0	0	0	0	0	0	0	0.3079	0	0	0	0	0	0	0	0	0	0	0	0	0	0	0	0	0	0	0	0	0	0	0	0	0
RPS_02	5.86	9.39	27.01	38.78	2.56	4208.155273	7522.4575	64.4825	0	6.3029	13.4863	1.0244	0	0	0	0.6141	13.9267	0	0.1631	0	0	0	0	0	0	0	0	0	0	0	0	0	0	0	0	0	0	0	0	0	0	0	0	0	0	0	0	0	0
RPS_02	2.55	3.28	5.11	7.81	1.65	4187.997559	7517.6	74.6412	0.6333	3.0441	10.4381	0.3058	0	0	0	0	10.9374	0	0	0	0	0	0	0	0	0	0	0	0	0	0	0	0	0	0	0	0	0	0	0	0	0	0	0	0	0	0	0	0
RPS_02	3.02	3.26	7.16	9.4	1.17	4212.940918	7500.04	70.7443	0.7437	3.4247	12.0504	0.3288	0	0	0	0.315	12.393	0	0	0	0	0	0	0	0	0	0	0	0	0	0	0	0	0	0	0	0	0	0	0	0	0	0	0	0	0	0	0	0
RPS_02	3.67	4.86	10.55	13.6	1.76	4205.907471	7490.1075	62.2699	1.5804	22.6623	0.9068	0.5164	4.9125	5.3027	0	0.4191	0.9047	0	0.2297	0	0	0	0	0.2954	0	0	0	0	0	0	0	0	0	0	0	0	0	0	0	0	0	0	0	0	0	0	0	0	0
RPS_02	1.42	1.64	1.59	4.49	1.32	4215.986328	7477.855	90.8218	1.021	4.7557	1.7233	0.1241	0	0	0	0	1.5541	0	0	0	0	0	0	0	0	0	0	0	0	0	0	0	0	0	0	0	0	0	0	0	0	0	0	0	0	0	0	0	0
RPS_02	2.6	3.3	5.32	8.97	1.61	4265.147949	7470.605	69.4695	0.7021	4.3534	11.7182	0.6928	0	0	0	0.3591	12.5368	0.168	0	0	0	0	0	0	0	0	0	0	0	0	0	0	0	0	0	0	0	0	0	0	0	0	0	0	0	0	0	0	0
RPS_02	2.3	3.04	4.14	8.1	1.75	4220.916992	7462.485	79.9753	0.8467	8.4673	3.5728	0.7854	0	0	0	2.5421	3.0631	0	0.7473	0	0	0	0	0	0	0	0	0	0	0	0	0	0	0	0	0	0	0	0	0	0	0	0	0	0	0	0	0	0
RPS_02	1.63	2.53	2.09	6.51	2.4	4222.947266	7458.57	92.1366	1.0706	2.8328	1.8415	0	0	0	0	0	2.1185	0	0	0	0	0	0	0	0	0	0	0	0	0	0	0	0	0	0	0	0	0	0	0	0	0	0	0	0	0	0	0	0
RPS_02	3.99	5.38	12.48	17.94	1.83	4186.982422	7455.235	66.4589	0.8458	8.6184	10.4653	1.3521	0	0	0	1.1829	10.6987	0	0.3779	0	0	0	0	0	0	0	0	0	0	0	0	0	0	0	0	0	0	0	0	0	0	0	0	0	0	0	0	0	0
RPS_02	3.32	3.93	8.67	11.58	1.4	4174.075684	7449.58	66.3701	0.5452	7.253	11.1258	1.3169	0	0	0	1.0165	11.8726	0.1569	0.3428	0	0	0	0	0	0	0	0	0	0	0	0	0	0	0	0	0	0	0	0	0	0	0	0	0	0	0	0	0	0
RPS_02	1.51	1.75	1.78	4.92	1.35	4172.480469	7436.0225	91.3915	1.246	3.5687	1.9523	0	0	0	0	0	1.8415	0	0	0	0	0	0	0	0	0	0	0	0	0	0	0	0	0	0	0	0	0	0	0	0	0	0	0	0	0	0	0	0
RPS_02	2.84	4	6.34	10.27	1.98	4274.864258	7431.89	81.0926	0.7093	4.136	6.598	0.1774	0	0	0	0.3123	6.9746	0	0	0	0	0	0	0	0	0	0	0	0	0	0	0	0	0	0	0	0	0	0	0	0	0	0	0	0	0	0	0	0
RPS_02	2.17	2.47	3.71	6.66	1.3	4280.955078	7431.89	89.2401	1.0332	4.7919	1.9665	0.5212	0	0	0	0.2643	2.1828	0	0	0	0	0	0	0	0	0	0	0	0	0	0	0	0	0	0	0	0	0	0	0	0	0	0	0	0	0	0	0	0
RPS_02	2.04	2.67	3.27	8.1	1.71	4270.368652	7427.975	88.3393	1.196	7.1757	0.9	0.8445	0	0	0	0.2247	1.3198	0	0	0	0	0	0	0	0	0	0	0	0	0	0	0	0	0	0	0	0	0	0	0	0	0	0	0	0	0	0	0	0
RPS_02	1.64	1.81	2.11	5.35	1.22	4187.272461	7423.5525	87.4112	1.0816	4.8909	3.0962	0.2876	0	0	0	0.1712	3.0613	0	0	0	0	0	0	0	0	0	0	0	0	0	0	0	0	0	0	0	0	0	0	0	0	0	0	0	0	0	0	0	0
RPS_02	3.37	4.2	8.94	10.85	1.55	4296.327148	7420.435	72.5619	1.6366	16.8574	0.1159	0.2682	2.8772	3.8851	0	0	0	0.3486	0.2177	0	0	0	0	0.9904	0.2409	0	0	0	0	0	0	0	0	0	0	0	0	0	0	0	0	0	0	0	0	0	0	0	0
RPS_02	1.88	2.15	2.78	5.79	1.31	4311.40918	7420.9425	88.9758	1.0949	3.7757	2.8379	0.1675	0	0	0	0.2595	2.8888	0	0	0	0	0	0	0	0	0	0	0	0	0	0	0	0	0	0	0	0	0	0	0	0	0	0	0	0	0	0	0	0
RPS_02	3.86	5.67	11.68	15.05	2.16	4260.362305	7415.07	69.4526	0.8186	5.6112	11.4578	0.5828	0	0	0	0.6126	11.2782	0	0.1861	0	0	0	0	0	0	0	0	0	0	0	0	0	0	0	0	0	0	0	0	0	0	0	0	0	0	0	0	0	0
RPS_02	1.99	2.29	3.1	6.51	1.33	4311.699219	7415.505	89.5148	0.9506	4.425	2.4216	0.2996	0	0	0	0.1538	2.2346	0	0	0	0	0	0	0	0	0	0	0	0	0	0	0	0	0	0	0	0	0	0	0	0	0	0	0	0	0	0	0	0
RPS_02	2.17	2.53	3.68	6.95	1.36	4186.837402	7409.125	85.1752	1.5266	9.8171	0	0.2362	1.2551	1.7719	0	0	0	0	0	0	0	0	0	0.2179	0	0	0	0	0	0	0	0	0	0	0	0	0	0	0	0	0	0	0	0	0	0	0	0	0
RPS_02	2.14	2.43	3.6	6.66	1.28	4101.920898	7504.535	73.0846	0.5496	6.6729	8.524	1.0933	0.1017	0.1613	0	0.3944	9.4181	0	0	0	0	0	0	0	0	0	0	0	0	0	0	0	0	0	0	0	0	0	0	0	0	0	0	0	0	0	0	0	0
RPS_02	4.06	4.91	12.96	15.19	1.46	4146.151855	7490.325	58.6283	0	6.3141	15.9646	1.2672	0	0.1245	0	0.8396	16.6885	0	0.1732	0	0	0	0	0	0	0	0	0	0	0	0	0	0	0	0	0	0	0	0	0	0	0	0	0	0	0	0	0	0
RPS_02	1.49	1.77	1.74	4.49	1.41	4126.719238	7491.2675	90.3222	1.0239	4.8026	1.82	0.2165	0	0	0	0	1.8148	0	0	0	0	0	0	0	0	0	0	0	0	0	0	0	0	0	0	0	0	0	0	0	0	0	0	0	0	0	0	0	0
RPS_02	4.07	4.63	13.02	15.19	1.29	4130.924805	7480.175	67.4255	0.5695	7.5034	10.6776	1.377	0	0	0	1.1132	11.0455	0	0.2883	0	0	0	0	0	0	0	0	0	0	0	0	0	0	0	0	0	0	0	0	0	0	0	0	0	0	0	0	0	0
RPS_02	4.99	5.34	19.55	16.49	1.14	4150.212402	7461.47	57.4296	0	10.275	13.275	0.8406	1.1924	2.5992	0	0.9462	13.0896	0	0.3525	0	0	0	0	0	0	0	0	0	0	0	0	0	0	0	0	0	0	0	0	0	0	0	0	0	0	0	0	0	0
RPS_02	3.29	3.66	8.52	10.85	1.24	4166.019531	7456.25	69.2661	1.1841	5.4665	10.6299	0.6138	0	0	0	0.947	11.0211	0.1825	0.4725	0	0	0	0	0	0.2166	0	0	0	0	0	0	0	0	0	0	0	0	0	0	0	0	0	0	0	0	0	0	0	0
RPS_02	2.97	3.48	6.91	10.42	1.38	4124.398926	7435.08	66.6367	0	5.4776	12.809	0.9164	0	0	0	0.7815	13.1552	0	0.2236	0	0	0	0	0	0	0	0	0	0	0	0	0	0	0	0	0	0	0	0	0	0	0	0	0	0	0	0	0	0
RPS_02	7.62	9.71	45.6	36.46	1.62	4055.949707	7425.8	57.3091	0.8039	15.9375	8.7553	1.4981	1.9805	3.4386	0	0.264	8.501	0.381	0	0	0	0	0	1.131	0	0	0	0	0	0	0	0	0	0	0	0	0	0	0	0	0	0	0	0	0	0	0	0	0
RPS_02	5.01	6.35	19.68	23.73	1.61	4050.003906	7420.9425	55.3829	1.4975	23.6832	0.8502	0.9114	5.6345	8.9252	0	0.375	0.4776	0.4327	0.3621	0	0	0	0.1926	1.0261	0.249	0	0	0	0	0	0	0	0	0	0	0	0	0	0	0	0	0	0	0	0	0	0	0	0
RPS_02	1.38	1.57	1.49	4.2	1.29	4032.746582	7420.3625	88.5401	0.9838	3.5812	3.1511	0.1572	0	0	0	0.2042	3.3824	0	0	0	0	0	0	0	0	0	0	0	0	0	0	0	0	0	0	0	0	0	0	0	0	0	0	0	0	0	0	0	0
RPS_02	3.01	4.09	7.1	12.01	1.85	4047.538574	7399.99	73.8752	0.816	6.5297	8.3423	0.8196	0	0	0	0.799	8.5237	0	0.2944	0	0	0	0	0	0	0	0	0	0	0	0	0	0	0	0	0	0	0	0	0	0	0	0	0	0	0	0	0	0
RPS_02	1.59	2.18	1.99	5.21	1.87	4109.461914	7395.1325	89.3901	0.7231	3.7705	2.8713	0.1421	0	0	0	0.1901	2.9128	0	0	0	0	0	0	0	0	0	0	0	0	0	0	0	0	0	0	0	0	0	0	0	0	0	0	0	0	0	0	0	0
RPS_02	2.2	2.84	3.79	7.67	1.67	4017.584473	7505.115	79.0681	0.8427	3.3645	8.0624	0.2562	0	0	0	0.2935	8.1127	0	0	0	0	0	0	0	0	0	0	0	0	0	0	0	0	0	0	0	0	0	0	0	0	0	0	0	0	0	0	0	0
RPS_02	3.24	3.91	8.25	11.43	1.46	3926.367188	7496.995	68.8121	0.5026	7.5201	9.7011	1.4892	0	0	0	1.1486	10.5323	0	0.294	0	0	0	0	0	0	0	0	0	0	0	0	0	0	0	0	0	0	0	0	0	0	0	0	0	0	0	0	0	0
RPS_02	2.43	2.84	4.65	7.81	1.37	4019.252197	7494.675	68.874	0.9663	3.9857	12.0954	0.3993	0	0	0	0.5512	12.9446	0	0.1835	0	0	0	0	0	0	0	0	0	0	0	0	0	0	0	0	0	0	0	0	0	0	0	0	0	0	0	0	0	0
RPS_02	2.52	3.04	4.98	8.1	1.46	3898.305908	7487.3525	75.899	0.7171	6.0141	7.7323	0.8657	0	0	0	0.3036	8.3025	0.1657	0	0	0	0	0	0	0	0	0	0	0	0	0	0	0	0	0	0	0	0	0	0	0	0	0	0	0	0	0	0	0
RPS_02	2.35	2.66	4.35	7.38	1.28	3885.181641	7483.51	74.6134	0.7759	5.0986	9.1462	0.5031	0	0	0	0.316	9.5468	0	0	0	0	0	0	0	0	0	0	0	0	0	0	0	0	0	0	0	0	0	0	0	0	0	0	0	0	0	0	0	0
RPS_02	4.83	6.98	18.32	26.33	2.09	3937.243652	7477.7825	82.1414	2.1618	11.7454	0	0	0.1275	0.2501	0	0.2885	0.8477	0	2.4375	0	0	0	0	0	0	0	0	0	0	0	0	0	0	0	0	0	0	0	0	0	0	0	0	0	0	0	0	0	0
RPS_02	2.96	3.52	6.87	10.13	1.42	3944.20459	7470.5325	71.5935	0.9265	5.2258	10.61	0.6457	0	0	0	0.2267	10.7718	0	0	0	0	0	0	0	0	0	0	0	0	0	0	0	0	0	0	0	0	0	0	0	0	0	0	0	0	0	0	0	0
RPS_02	2.65	2.95	5.51	8.54	1.24	3973.643555	7468.575	67.9477	0.757	6.8088	11.148	1.1619	0	0	0	0.2902	11.8864	0	0	0	0	0	0	0	0	0	0	0	0	0	0	0	0	0	0	0	0	0	0	0	0	0	0	0	0	0	0	0	0
RPS_02	1.81	2.47	2.57	6.95	1.86	3877.495605	7468.6475	88.4468	0.5208	4.3987	2.7676	0.3591	0	0	0	0.8389	2.1014	0	0.5667	0	0	0	0	0	0	0	0	0	0	0	0	0	0	0	0	0	0	0	0	0	0	0	0	0	0	0	0	0	0
RPS_02	1.93	2.25	2.93	6.51	1.35	3988.000488	7460.89	83.2025	0.6975	4.7719	5.246	0.4484	0	0	0	0.1405	5.4931	0	0	0	0	0	0	0	0	0	0	0	0	0	0	0	0	0	0	0	0	0	0	0	0	0	0	0	0	0	0	0	0
RPS_02	2.26	2.98	4.02	7.09	1.73	3991.335938	7460.31	86.8768	1.0645	3.1377	4.4188	0.1207	0	0	0	0	4.3816	0	0	0	0	0	0	0	0	0	0	0	0	0	0	0	0	0	0	0	0	0	0	0	0	0	0	0	0	0	0	0	0
RPS_02	2	2.56	3.14	6.95	1.64	3930.282715	7460.31	81.3848	0.7844	7.1589	3.1802	0.5727	0	0.1603	0	1.7945	3.5188	0.3308	1.1147	0	0	0	0	0	0	0	0	0	0	0	0	0	0	0	0	0	0	0	0	0	0	0	0	0	0	0	0	0	0
RPS_02	2.73	3.21	5.84	9.69	1.39	3971.685791	7458.425	71.2803	0.5965	7.6956	8.382	0.9488	0	0.1469	0	1.5999	8.3081	0.189	0.853	0	0	0	0	0	0	0	0	0	0	0	0	0	0	0	0	0	0	0	0	0	0	0	0	0	0	0	0	0	0
RPS_02	3.33	3.76	8.69	10.56	1.28	3879.670898	7457.9175	60.8066	0	5.2987	16.0919	0.7241	0	0	0	0.2175	16.8613	0	0	0	0	0	0	0	0	0	0	0	0	0	0	0	0	0	0	0	0	0	0	0	0	0	0	0	0	0	0	0	0
RPS_02	2.01	2.47	3.18	6.22	1.51	3963.927246	7452.77	81.3814	0.8801	4.2359	6.5152	0.2856	0	0	0	0	6.7017	0	0	0	0	0	0	0	0	0	0	0	0	0	0	0	0	0	0	0	0	0	0	0	0	0	0	0	0	0	0	0	0
RPS_02	4.51	5.35	15.95	15.34	1.41	3995.396484	7448.13	66.7944	1.5578	20.0314	0	2.2424	2.059	4.4259	0	0	0.2544	0.4215	1.4417	0	0	0	0	0.7715	0	0	0	0	0	0	0	0	0	0	0	0	0	0	0	0	0	0	0	0	0	0	0	0	0
RPS_02	1.57	2.11	1.93	5.79	1.81	3992.931152	7442.4025	91.9596	0.9535	3.6075	1.644	0.1478	0	0	0	0	1.6875	0	0	0	0	0	0	0	0	0	0	0	0	0	0	0	0	0	0	0	0	0	0	0	0	0	0	0	0	0	0	0	0
RPS_02	1.52	1.69	1.82	4.92	1.24	3923.321777	7438.1975	87.3055	0.754	5.5183	2.8594	0.418	0	0	0	0.1731	2.9717	0	0	0	0	0	0	0	0	0	0	0	0	0	0	0	0	0	0	0	0	0	0	0	0	0	0	0	0	0	0	0	0
RPS_02	2.03	2.36	3.22	6.08	1.35	3993.946289	7428.41	80.7854	0.7391	5.1698	6.4215	0.3589	0	0	0	0.1386	6.3867	0	0	0	0	0	0	0	0	0	0	0	0	0	0	0	0	0	0	0	0	0	0	0	0	0	0	0	0	0	0	0	0
RPS_02	2.23	3.79	3.89	9.4	2.89	4004.822754	7426.09	91.9564	1.3211	4.7206	0.9273	0.2146	0	0	0	0.1976	0.6625	0	0	0	0	0	0	0	0	0	0	0	0	0	0	0	0	0	0	0	0	0	0	0	0	0	0	0	0	0	0	0	0
RPS_02	3.28	4.4	8.44	14.32	1.8	3919.696289	7425.51	67.0917	0.6452	3.6857	14.025	0.3641	0	0	0	0.158	14.0304	0	0	0	0	0	0	0	0	0	0	0	0	0	0	0	0	0	0	0	0	0	0	0	0	0	0	0	0	0	0	0	0
RPS_02	1.71	1.88	2.3	5.35	1.21	3992.061035	7421.0875	87.6665	0.9534	4.3816	3.0076	0.4054	0	0	0	0.1777	3.4077	0	0	0	0	0	0	0	0	0	0	0	0	0	0	0	0	0	0	0	0	0	0	0	0	0	0	0	0	0	0	0	0
RPS_02	2.44	2.75	4.67	8.1	1.27	3964.362305	7420.435	67.0104	1.1907	8.5106	10.1087	1.6066	0	0	0	0.6264	10.75	0.1966	0	0	0	0	0	0	0	0	0	0	0	0	0	0	0	0	0	0	0	0	0	0	0	0	0	0	0	0	0	0	0
RPS_02	4.93	6.18	19.09	20.69	1.57	3915.200684	7415.2875	61.6174	0.8041	14.3343	6.8563	0.9788	2.0836	3.6508	0	1.147	6.8703	0.2648	0.654	0	0	0	0	0.7385	0	0	0	0	0	0	0	0	0	0	0	0	0	0	0	0	0	0	0	0	0	0	0	0	0
RPS_02	3.94	4.91	12.2	15.34	1.55	3974.368652	7413.04	67.0476	0.5505	4.6421	12.884	0.613	0	0	0	0.3917	13.871	0	0	0	0	0	0	0	0	0	0	0	0	0	0	0	0	0	0	0	0	0	0	0	0	0	0	0	0	0	0	0	0
RPS_02	2.05	2.46	3.31	6.51	1.44	3990.320801	7406.95	90.4894	0.9964	3.7996	2.1231	0.1166	0	0	0	0.2768	2.1981	0	0	0	0	0	0	0	0	0	0	0	0	0	0	0	0	0	0	0	0	0	0	0	0	0	0	0	0	0	0	0	0
RPS_02	2.53	3.07	5.02	8.83	1.47	3996.556641	7399.845	90.6744	1.2195	4.32	1.8076	0	0	0	0	0	1.9785	0	0	0	0	0	0	0	0	0	0	0	0	0	0	0	0	0	0	0	0	0	0	0	0	0	0	0	0	0	0	0	0
RPS_02	5.38	6.25	22.71	21.85	1.35	3935.648438	7394.9875	56.3744	1.2252	17.5593	6.3045	0.8246	2.4125	6.4389	0	0.6623	6.293	0.4095	0.5115	0.1781	0	0	0	0.8063	0	0	0	0	0	0	0	0	0	0	0	0	0	0	0	0	0	0	0	0	0	0	0	0	0
RPS_02	2.9	3.24	6.62	9.4	1.24	3948.410156	7396.075	72.5074	0.6591	7.3772	7.6816	1.127	0	0	0	1.1864	9.0453	0	0.416	0	0	0	0	0	0	0	0	0	0	0	0	0	0	0	0	0	0	0	0	0	0	0	0	0	0	0	0	0	0
RPS_02	2.17	2.43	3.71	6.95	1.25	3941.594238	7618.52	75.6068	0	4.3519	9.3904	0.5395	0	0.1685	0	0.3698	9.5732	0	0	0	0	0	0	0	0	0	0	0	0	0	0	0	0	0	0	0	0	0	0	0	0	0	0	0	0	0	0	0	0
RPS_02	1.85	2.43	2.7	6.22	1.71	3905.774414	7617.94	86.4932	0.9141	2.8521	4.6966	0.1224	0	0	0	0	4.9217	0	0	0	0	0	0	0	0	0	0	0	0	0	0	0	0	0	0	0	0	0	0	0	0	0	0	0	0	0	0	0	0
RPS_02	1.18	1.33	1.09	3.76	1.28	3903.599121	7618.0125	91.0749	0	3.2809	2.7037	0.1546	0	0	0	0.1465	2.6394	0	0	0	0	0	0	0	0	0	0	0	0	0	0	0	0	0	0	0	0	0	0	0	0	0	0	0	0	0	0	0	0
RPS_02	4.13	5.12	13.4	14.18	1.53	3946.524902	7606.775	56.8773	2.0354	25.8434	0	0.1693	6.9524	7.382	0	0	0	0	0	0	0	0	0	0.7402	0	0	0	0	0	0	0	0	0	0	0	0	0	0	0	0	0	0	0	0	0	0	0	0	0
RPS_02	1.99	2.5	3.1	6.66	1.58	4004.967773	7606.63	74.4866	0.679	4.5854	9.1553	0.8546	0	0	0	0.5507	9.6884	0	0	0	0	0	0	0	0	0	0	0	0	0	0	0	0	0	0	0	0	0	0	0	0	0	0	0	0	0	0	0	0
RPS_02	5.58	7.53	24.47	19.1	1.82	4007.433105	7585.6775	39.1326	1.9708	35.6781	0.1621	0.2934	7.3425	14.4377	0	0	0	0	0	0.2135	0	0	0	0.7693	0	0	0	0	0	0	0	0	0	0	0	0	0	0	0	0	0	0	0	0	0	0	0	0	0
RPS_02	4.61	5.73	16.66	16.93	1.55	3883.876465	7578.5	59.3924	1.8012	24.2969	0.3269	1.0345	4.5032	7.2038	0	0	0	0.6833	0	0	0	0	0	0.7578	0	0	0	0	0	0	0	0	0	0	0	0	0	0	0	0	0	0	0	0	0	0	0	0	0
RPS_02	1.95	2.15	2.99	6.08	1.21	3943.044434	7571.1775	83.624	0.8399	3.9389	5.0589	0.2878	0	0	0	0.856	5.0066	0	0.3879	0	0	0	0	0	0	0	0	0	0	0	0	0	0	0	0	0	0	0	0	0	0	0	0	0	0	0	0	0	0
RPS_02	2.34	2.79	4.31	7.67	1.42	3902.438965	7550.95	87.1714	1.2055	2.9144	4.2686	0.1119	0	0	0	0	4.3282	0	0	0	0	0	0	0	0	0	0	0	0	0	0	0	0	0	0	0	0	0	0	0	0	0	0	0	0	0	0	0	0
RPS_02	1.82	2.4	2.6	6.22	1.74	3891.41748	7548.775	85.4811	0.5973	4.1277	4.2627	0.4438	0.1264	0	0	0.3549	4.606	0	0	0	0	0	0	0	0	0	0	0	0	0	0	0	0	0	0	0	0	0	0	0	0	0	0	0	0	0	0	0	0
RPS_02	2.18	2.47	3.75	7.23	1.28	3976.833984	7543.845	87.6647	0.9506	3.8039	3.4965	0.1455	0	0	0	0.2261	3.7126	0	0	0	0	0	0	0	0	0	0	0	0	0	0	0	0	0	0	0	0	0	0	0	0	0	0	0	0	0	0	0	0
RPS_02	2.93	3.56	6.74	9.69	1.48	3877.640625	7537.61	71.7573	0.8396	4.1325	11.2429	0.3693	0	0	0	0.3128	11.3456	0	0	0	0	0	0	0	0	0	0	0	0	0	0	0	0	0	0	0	0	0	0	0	0	0	0	0	0	0	0	0	0
RPS_02	1.8	2.03	2.55	6.08	1.27	3876.19043	7531.375	85.9585	1.163	5.6437	2.7094	0.8709	0	0	0	0.3545	3.3002	0	0	0	0	0	0	0	0	0	0	0	0	0	0	0	0	0	0	0	0	0	0	0	0	0	0	0	0	0	0	0	0
RPS_02	4.29	5.83	14.49	17.8	1.84	3896.348145	7523.4725	71.3528	0.8462	6.7656	9.351	1.038	0	0	0	0.732	9.7365	0	0.1781	0	0	0	0	0	0	0	0	0	0	0	0	0	0	0	0	0	0	0	0	0	0	0	0	0	0	0	0	0	0
RPS_02	1.85	2.64	2.68	6.37	2.04	3944.929688	7520.79	88.7687	1.0282	3.9515	2.9192	0	0	0	0	0.1777	3.1547	0	0	0	0	0	0	0	0	0	0	0	0	0	0	0	0	0	0	0	0	0	0	0	0	0	0	0	0	0	0	0	0
RPS_02	2	2.19	3.14	6.51	1.2	4019.179688	7513.395	86.1033	1.0773	3.403	4.4312	0.1814	0	0	0	0.2099	4.5939	0	0	0	0	0	0	0	0	0	0	0	0	0	0	0	0	0	0	0	0	0	0	0	0	0	0	0	0	0	0	0	0
RPS_02	2.24	2.84	3.96	7.81	1.6	4018.019531	7509.335	83.8026	0.9019	3.1378	5.9727	0.1181	0	0	0	0.2137	5.8533	0	0	0	0	0	0	0	0	0	0	0	0	0	0	0	0	0	0	0	0	0	0	0	0	0	0	0	0	0	0	0	0
RPS_02	2.64	3.83	5.48	10.13	2.1	3903.744141	7729.605	78.3388	0.6949	3.7486	8.1925	0.2792	0	0	0	0.1679	8.578	0	0	0	0	0	0	0	0	0	0	0	0	0	0	0	0	0	0	0	0	0	0	0	0	0	0	0	0	0	0	0	0
RPS_02	2.52	3.48	4.98	9.12	1.91	3941.594238	7724.385	78.7452	0.5735	5.6285	6.7264	0.5755	0	0	0	0.6542	6.8088	0	0.2879	0	0	0	0	0	0	0	0	0	0	0	0	0	0	0	0	0	0	0	0	0	0	0	0	0	0	0	0	0	0
RPS_02	1.32	1.74	1.36	4.34	1.75	3910.560059	7723.7325	93.4526	0.9123	3.578	1.0227	0	0	0	0	0	1.0344	0	0	0	0	0	0	0	0	0	0	0	0	0	0	0	0	0	0	0	0	0	0	0	0	0	0	0	0	0	0	0	0
RPS_02	2.73	3.25	5.84	9.26	1.42	3917.593506	7710.755	78.6616	0.8036	4.1553	7.6998	0.262	0	0	0	0.401	8.0168	0	0	0	0	0	0	0	0	0	0	0	0	0	0	0	0	0	0	0	0	0	0	0	0	0	0	0	0	0	0	0	0
RPS_02	2.04	2.33	3.27	6.51	1.31	4017.729492	7702.2	82.8588	0.9176	4.1243	5.6339	0.2463	0	0	0	0.3646	5.8546	0	0	0	0	0	0	0	0	0	0	0	0	0	0	0	0	0	0	0	0	0	0	0	0	0	0	0	0	0	0	0	0
RPS_02	4.99	6.28	19.53	24.6	1.59	3909.399902	7686.105	56.2107	0	6.3755	16.6174	1.4208	0	0.1533	0	0.9008	18.0149	0	0.3066	0	0	0	0	0	0	0	0	0	0	0	0	0	0	0	0	0	0	0	0	0	0	0	0	0	0	0	0	0	0
RPS_02	3.15	3.86	7.79	10.85	1.5	3940.434082	7686.54	66.0119	0	5.8123	13.1152	1.1012	0	0	0	0.5259	13.4336	0	0	0	0	0	0	0	0	0	0	0	0	0	0	0	0	0	0	0	0	0	0	0	0	0	0	0	0	0	0	0	0
RPS_02	2.91	3.66	6.64	9.69	1.59	3972.628418	7680.74	68.4504	0	3.568	13.068	0.486	0	0	0	0.4553	13.7841	0	0.1881	0	0	0	0	0	0	0	0	0	0	0	0	0	0	0	0	0	0	0	0	0	0	0	0	0	0	0	0	0	0
RPS_02	2.83	3.39	6.28	10.42	1.44	3898.813477	7673.78	73.9417	0.6249	5.3355	8.8689	0.6048	0	0	0	0.9297	9.0312	0.1637	0.4996	0	0	0	0	0	0	0	0	0	0	0	0	0	0	0	0	0	0	0	0	0	0	0	0	0	0	0	0	0	0
RPS_02	3.29	5.05	8.48	17.94	2.37	3915.345703	7671.025	86.8595	1.218	7.3125	1.6919	0.5099	0	0	0	0.6644	1.4449	0	0.2988	0	0	0	0	0	0	0	0	0	0	0	0	0	0	0	0	0	0	0	0	0	0	0	0	0	0	0	0	0	0
RPS_02	2.54	2.85	5.07	8.1	1.26	3912.590332	7668.56	79.23	0.5546	3.3094	8.2153	0.2255	0	0	0	0	8.4653	0	0	0	0	0	0	0	0	0	0	0	0	0	0	0	0	0	0	0	0	0	0	0	0	0	0	0	0	0	0	0	0
RPS_02	1.76	2.15	2.43	5.79	1.5	3899.828613	7666.53	87.8425	0.823	4.3818	3.5028	0.1805	0	0	0	0	3.2693	0	0	0	0	0	0	0	0	0	0	0	0	0	0	0	0	0	0	0	0	0	0	0	0	0	0	0	0	0	0	0	0
RPS_02	2.54	3.07	5.07	8.97	1.46	3971.758301	7665.805	69.016	0.5123	4.4976	12.0983	0.6445	0	0	0	0.641	12.1187	0.187	0.2846	0	0	0	0	0	0	0	0	0	0	0	0	0	0	0	0	0	0	0	0	0	0	0	0	0	0	0	0	0	0
RPS_02	2.27	3.17	4.06	8.1	1.95	3903.164063	7661.89	88.733	1.1451	3.6811	3.0996	0.231	0	0	0	0	3.1103	0	0	0	0	0	0	0	0	0	0	0	0	0	0	0	0	0	0	0	0	0	0	0	0	0	0	0	0	0	0	0	0
RPS_02	3.47	4.92	9.46	20.55	2.01	4015.989258	7650.29	71.8079	0	5.3596	10.5121	0.8472	0	0	0	0.67	10.6115	0	0.1918	0	0	0	0	0	0	0	0	0	0	0	0	0	0	0	0	0	0	0	0	0	0	0	0	0	0	0	0	0	0
RPS_02	5	6	19.62	17.07	1.44	3913.025391	7648.7675	51.0871	1.8621	29.2804	0.1152	0.455	7.1057	9.0657	0	0	0	0.4042	0	0	0	0	0	0.6247	0	0	0	0	0	0	0	0	0	0	0	0	0	0	0	0	0	0	0	0	0	0	0	0	0
RPS_02	1.57	1.77	1.93	4.63	1.27	3905.629395	7649.6375	87.9361	0.8976	5.3782	2.5197	0.5067	0	0	0	0.2584	2.5032	0	0	0	0	0	0	0	0	0	0	0	0	0	0	0	0	0	0	0	0	0	0	0	0	0	0	0	0	0	0	0	0
RPS_02	2.83	3.34	6.28	9.26	1.4	4003.08252	7648.84	72.9407	0.9111	4.0899	10.3727	0.3572	0	0	0	0.5049	10.8234	0	0	0	0	0	0	0	0	0	0	0	0	0	0	0	0	0	0	0	0	0	0	0	0	0	0	0	0	0	0	0	0
RPS_02	2.97	3.43	6.93	9.4	1.33	3972.338379	7643.62	70.1055	0	4.9598	11.5959	0.3847	0	0	0	0.7219	12.2322	0	0	0	0	0	0	0	0	0	0	0	0	0	0	0	0	0	0	0	0	0	0	0	0	0	0	0	0	0	0	0	0
RPS_02	2.19	2.53	3.77	6.95	1.33	3942.029297	7625.64	77.141	0.6038	3.7255	9.103	0.504	0	0	0	0.3358	8.587	0	0	0	0	0	0	0	0	0	0	0	0	0	0	0	0	0	0	0	0	0	0	0	0	0	0	0	0	0	0	0	0
RPS_02	2.17	3.77	3.71	11.29	3.02	3905.629395	7625.205	86.0959	0.6042	2.6645	5.1697	0.1628	0	0	0	0	5.3029	0	0	0	0	0	0	0	0	0	0	0	0	0	0	0	0	0	0	0	0	0	0	0	0	0	0	0	0	0	0	0	0
RPS_02	2.04	2.46	3.27	6.51	1.46	4026.293213	7729.75	83.5983	1.58	10.1341	0	0.1354	1.7467	2.2169	0	0	0	0.2559	0	0	0	0	0	0.3327	0	0	0	0	0	0	0	0	0	0	0	0	0	0	0	0	0	0	0	0	0	0	0	0	0
RPS_02	3.5	4.03	9.63	11.72	1.32	4126.719238	7722.645	68.0133	0.5546	5.2601	11.2254	0.9205	0.1109	0	0	1.0731	12.4369	0	0.4052	0	0	0	0	0	0	0	0	0	0	0	0	0	0	0	0	0	0	0	0	0	0	0	0	0	0	0	0	0	0
RPS_02	2.68	4.32	5.63	10.27	2.6	4044.203125	7713.075	72.9488	0.6005	4.466	10.6038	0.5239	0	0	0	0	10.8572	0	0	0	0	0	0	0	0	0	0	0	0	0	0	0	0	0	0	0	0	0	0	0	0	0	0	0	0	0	0	0	0
RPS_02	2.07	2.47	3.35	6.66	1.43	4036.807129	7704.375	84.0424	1.2169	4.139	4.8909	0.2169	0	0	0	0.2038	5.2901	0	0	0	0	0	0	0	0	0	0	0	0	0	0	0	0	0	0	0	0	0	0	0	0	0	0	0	0	0	0	0	0
RPS_02	2.12	2.36	3.52	6.66	1.24	4120.04834	7701.185	76.8248	0.5523	5.5511	8.0491	0.591	0	0	0	0.1922	8.2395	0	0	0	0	0	0	0	0	0	0	0	0	0	0	0	0	0	0	0	0	0	0	0	0	0	0	0	0	0	0	0	0
RPS_02	4.61	5.36	16.66	17.94	1.35	4025.350586	7699.155	55.712	0	5.0758	16.6752	1.2272	0	0.16	0	1.4702	18.2781	0.203	0.6702	0	0	0	0	0.2248	0.3035	0	0	0	0	0	0	0	0	0	0	0	0	0	0	0	0	0	0	0	0	0	0	0	0
RPS_02	1.83	2.05	2.62	5.5	1.26	4067.696289	7700.0975	86.6831	1.0074	4.044	4.0368	0.1726	0	0	0	0	4.0561	0	0	0	0	0	0	0	0	0	0	0	0	0	0	0	0	0	0	0	0	0	0	0	0	0	0	0	0	0	0	0	0
RPS_02	1.91	2.73	2.87	7.23	2.04	4072.481934	7698.285	92.2097	1.1834	3.529	1.483	0.1095	0	0	0	0	1.4853	0	0	0	0	0	0	0	0	0	0	0	0	0	0	0	0	0	0	0	0	0	0	0	0	0	0	0	0	0	0	0	0
RPS_02	2.79	3.07	6.11	8.83	1.21	4058.705078	7694.08	73.6016	0.7877	5.4509	9.0769	0.6589	0	0	0	0.6601	9.5079	0	0.256	0	0	0	0	0	0	0	0	0	0	0	0	0	0	0	0	0	0	0	0	0	0	0	0	0	0	0	0	0	0
RPS_02	2.09	2.56	3.43	6.66	1.5	4023.320313	7685.38	86.2593	0.9391	4.0462	3.8804	0.2119	0	0	0	0.3664	4.098	0.1987	0	0	0	0	0	0	0	0	0	0	0	0	0	0	0	0	0	0	0	0	0	0	0	0	0	0	0	0	0	0	0
RPS_02	1.83	2.07	2.62	5.79	1.29	4071.756836	7680.305	88.3954	1.2373	4.1259	3.0011	0.1933	0	0	0	0	3.047	0	0	0	0	0	0	0	0	0	0	0	0	0	0	0	0	0	0	0	0	0	0	0	0	0	0	0	0	0	0	0	0
RPS_02	2.23	3.34	3.91	8.25	2.24	4074.222168	7675.375	86.1345	1.3982	8.7932	0.4561	0.2196	0.2097	2.3422	0	0.2101	0.2363	0	0	0	0	0	0	0	0	0	0	0	0	0	0	0	0	0	0	0	0	0	0	0	0	0	0	0	0	0	0	0	0
RPS_02	2.02	2.25	3.2	6.51	1.24	4166.30957	7675.665	84.2202	0.9043	5.5925	4.1791	0.6202	0	0	0	0.1973	4.2864	0	0	0	0	0	0	0	0	0	0	0	0	0	0	0	0	0	0	0	0	0	0	0	0	0	0	0	0	0	0	0	0
RPS_02	1.78	2.03	2.49	5.79	1.3	4030.42627	7662.18	82.6186	0.6463	5.9329	4.7138	0.9287	0	0	0	0.369	4.7908	0	0	0	0	0	0	0	0	0	0	0	0	0	0	0	0	0	0	0	0	0	0	0	0	0	0	0	0	0	0	0	0
RPS_02	1.66	2.06	2.16	5.35	1.54	4028.395996	7656.1625	86.8409	1.0103	4.1075	3.6327	0.1829	0	0	0	0.2595	3.9662	0	0	0	0	0	0	0	0	0	0	0	0	0	0	0	0	0	0	0	0	0	0	0	0	0	0	0	0	0	0	0	0
RPS_02	2.43	2.78	4.63	8.1	1.31	4137.160645	7648.405	73.7523	0.9578	3.124	10.7877	0.1882	0	0	0	0.2615	10.9285	0	0	0	0	0	0	0	0	0	0	0	0	0	0	0	0	0	0	0	0	0	0	0	0	0	0	0	0	0	0	0	0
RPS_02	4.12	4.81	13.36	16.06	1.36	4052.759277	7634.485	68.583	0.5058	3.5499	12.6796	0.2999	0	0	0	0.8022	13.2583	0	0.3212	0	0	0	0	0	0	0	0	0	0	0	0	0	0	0	0	0	0	0	0	0	0	0	0	0	0	0	0	0	0
RPS_02	3.58	4.51	10.09	12.59	1.58	4077.847656	7626.945	58.932	1.3506	18.1982	6.612	0.5409	2.338	6.3804	0	0.5695	4.6557	0	0.4227	0	0	0	0	0	0	0	0	0	0	0	0	0	0	0	0	0	0	0	0	0	0	0	0	0	0	0	0	0	0
RPS_02	2.35	3.36	4.35	8.39	2.03	4228.167969	7730.91	77.6487	0.7475	4.5151	8.1351	0.3337	0	0	0	0.3908	8.2292	0	0	0	0	0	0	0	0	0	0	0	0	0	0	0	0	0	0	0	0	0	0	0	0	0	0	0	0	0	0	0	0
RPS_02	1.31	1.76	1.34	4.05	1.82	4306.333496	7730.2575	89.0455	0.9089	7.2596	0	0	0.1411	2.6449	0	0	0	0	0	0	0	0	0	0	0	0	0	0	0	0	0	0	0	0	0	0	0	0	0	0	0	0	0	0	0	0	0	0	0
RPS_02	1.74	1.93	2.39	5.79	1.23	4315.179688	7720.47	92.2318	1.2072	3.607	1.3402	0.1352	0	0	0	0.2192	1.2593	0	0	0	0	0	0	0	0	0	0	0	0	0	0	0	0	0	0	0	0	0	0	0	0	0	0	0	0	0	0	0	0
RPS_02	3.89	6.92	11.87	14.32	3.17	4294.586914	7715.7575	84.7496	1.43	4.884	4.1828	0.22	0	0	0	0.3336	4.1999	0	0	0	0	0	0	0	0	0	0	0	0	0	0	0	0	0	0	0	0	0	0	0	0	0	0	0	0	0	0	0	0
RPS_02	4.52	5.16	16.04	15.77	1.31	4282.912842	7710.2475	55.1827	0	7.8637	15.7263	1.0614	0	0	0	2.0269	17.1073	0	1.0317	0	0	0	0	0	0	0	0	0	0	0	0	0	0	0	0	0	0	0	0	0	0	0	0	0	0	0	0	0	0
RPS_02	2.01	4.08	3.16	10.71	4.15	4237.304199	7688.28	91.1347	0.9989	3.0418	2.2993	0	0	0	0	0	2.5254	0	0	0	0	0	0	0	0	0	0	0	0	0	0	0	0	0	0	0	0	0	0	0	0	0	0	0	0	0	0	0	0
RPS_02	1.83	2.53	2.62	6.66	1.92	4233.82373	7687.555	80.5096	0.6502	2.413	7.7116	0.2189	0	0	0	0	8.4966	0	0	0	0	0	0	0	0	0	0	0	0	0	0	0	0	0	0	0	0	0	0	0	0	0	0	0	0	0	0	0	0
RPS_02	2.35	4.67	4.33	11	3.96	4232.373535	7684.075	88.5115	0.9958	2.8876	3.6644	0	0	0	0	0	3.9407	0	0	0	0	0	0	0	0	0	0	0	0	0	0	0	0	0	0	0	0	0	0	0	0	0	0	0	0	0	0	0	0
RPS_02	2.1	2.75	3.48	7.38	1.71	4238.319336	7677.84	91.0349	1.3923	5.0462	0.4537	0.2396	0	0	0	1.1066	0.1513	0	0.5754	0	0	0	0	0	0	0	0	0	0	0	0	0	0	0	0	0	0	0	0	0	0	0	0	0	0	0	0	0	0
RPS_02	4.86	6.63	18.57	19.68	1.86	4175.960938	7668.6325	73.5892	0.5175	5.9449	8.9739	0.8697	0	0	0	0.8302	9.2747	0	0	0	0	0	0	0	0	0	0	0	0	0	0	0	0	0	0	0	0	0	0	0	0	0	0	0	0	0	0	0	0
RPS_02	3.6	4.39	10.17	13.17	1.49	4190.60791	7669.285	66.2609	0.8142	8.0475	10.3591	1.6713	0	0	0	1.4341	10.9259	0	0.487	0	0	0	0	0	0	0	0	0	0	0	0	0	0	0	0	0	0	0	0	0	0	0	0	0	0	0	0	0	0
RPS_02	1.87	3.2	2.74	11.86	2.93	4304.013184	7654.93	91.8299	1.1049	4.8932	0.738	0.2024	0	0	0	0.4863	0.462	0	0.2834	0	0	0	0	0	0	0	0	0	0	0	0	0	0	0	0	0	0	0	0	0	0	0	0	0	0	0	0	0	0
RPS_02	3.86	4.81	11.72	13.75	1.55	4266.743164	7648.695	66.5179	1.1184	18.1329	0	0.3213	5.0479	6.3914	0	0.4432	0	0.9425	0.5007	0	0	0	0	0.584	0	0	0	0	0	0	0	0	0	0	0	0	0	0	0	0	0	0	0	0	0	0	0	0	0
RPS_02	2.05	2.47	3.29	7.52	1.46	4203.07959	7642.17	89.6119	0.9162	3.6603	2.8869	0	0	0	0	0	2.9248	0	0	0	0	0	0	0	0	0	0	0	0	0	0	0	0	0	0	0	0	0	0	0	0	0	0	0	0	0	0	0	0
RPS_02	2.29	2.88	4.12	7.67	1.58	4189.012695	7626.8	86.9467	1.1038	3.103	4.1231	0	0	0	0	0.1638	4.5596	0	0	0	0	0	0	0	0	0	0	0	0	0	0	0	0	0	0	0	0	0	0	0	0	0	0	0	0	0	0	0	0
RPS_02	5.27	6.28	21.79	23.44	1.42	4382.983887	7729.5325	60.2477	1.3874	18.3372	2.7464	0.4531	2.9034	7.6408	0	1.0776	2.573	1.7639	0.6051	0	0	0	0	0.2643	0	0	0	0	0	0	0	0	0	0	0	0	0	0	0	0	0	0	0	0	0	0	0	0	0
RPS_02	2.56	2.85	5.15	8.54	1.24	4392.410156	7720.76	80.8115	1.0066	5.2954	5.741	0.6834	0	0	0	0.3844	6.0776	0	0	0	0	0	0	0	0	0	0	0	0	0	0	0	0	0	0	0	0	0	0	0	0	0	0	0	0	0	0	0	0
RPS_02	6.43	11.81	32.43	35.88	3.38	4404.519287	7706.3325	48.6222	1.5524	29.1898	2.0282	0.6475	6.3559	8.257	0	0.1379	1.9838	0.1664	0	0	0	0	0	1.0589	0	0	0	0	0	0	0	0	0	0	0	0	0	0	0	0	0	0	0	0	0	0	0	0	0
RPS_02	3.98	5.14	12.41	13.89	1.67	4416.628418	7701.765	72.523	0.7362	3.3853	11.568	0.1809	0	0	0	0.2604	11.346	0	0	0	0	0	0	0	0	0	0	0	0	0	0	0	0	0	0	0	0	0	0	0	0	0	0	0	0	0	0	0	0
RPS_02	1.99	2.4	3.12	6.22	1.44	4321.205566	7699.155	81.4169	0.6831	3.8453	6.7187	0.4187	0	0	0	0.2479	6.6695	0	0	0	0	0	0	0	0	0	0	0	0	0	0	0	0	0	0	0	0	0	0	0	0	0	0	0	0	0	0	0	0
RPS_02	3.25	3.58	8.29	10.85	1.21	4449.692871	7687.41	66.48	0	4.0434	14.2458	0.5701	0	0	0	0.2421	14.4185	0	0	0	0	0	0	0	0	0	0	0	0	0	0	0	0	0	0	0	0	0	0	0	0	0	0	0	0	0	0	0	0
RPS_02	3.55	4.22	9.9	12.44	1.41	4443.021973	7683.93	66.291	0.5579	5.2247	13.193	0.4249	0	0	0	0.6542	13.3935	0.2609	0	0	0	0	0	0	0	0	0	0	0	0	0	0	0	0	0	0	0	0	0	0	0	0	0	0	0	0	0	0	0
RPS_02	7.2	8.43	40.7	25.18	1.37	4414.018066	7681.8275	40.7223	1.9639	32.5966	1.9847	0.2775	7.7846	12.397	0	0	0.15	0.1984	1.2943	0	0	0	0	0.6307	0	0	0	0	0	0	0	0	0	0	0	0	0	0	0	0	0	0	0	0	0	0	0	0	0
RPS_02	2.75	2.98	5.92	8.39	1.18	4398.065918	7676.7525	69.6809	0	4.3996	12.5418	0.3844	0	0	0	0	12.9933	0	0	0	0	0	0	0	0	0	0	0	0	0	0	0	0	0	0	0	0	0	0	0	0	0	0	0	0	0	0	0	0
RPS_02	1.46	1.65	1.67	4.63	1.28	4354.27002	7677.1875	89.611	0.8269	4.6399	2.1642	0.3791	0	0	0	0.1847	2.1942	0	0	0	0	0	0	0	0	0	0	0	0	0	0	0	0	0	0	0	0	0	0	0	0	0	0	0	0	0	0	0	0
RPS_02	1.74	1.97	2.39	5.35	1.27	4359.345703	7668.9225	84.4506	0.6685	4.3111	4.8496	0.317	0	0	0	0.1505	5.2528	0	0	0	0	0	0	0	0	0	0	0	0	0	0	0	0	0	0	0	0	0	0	0	0	0	0	0	0	0	0	0	0
RPS_02	2.58	2.95	5.21	8.83	1.31	4462.744629	7663.485	83.3356	1.0608	3.1671	5.9205	0.1405	0	0	0	0.2047	6.1708	0	0	0	0	0	0	0	0	0	0	0	0	0	0	0	0	0	0	0	0	0	0	0	0	0	0	0	0	0	0	0	0
RPS_02	3.12	4.08	7.64	13.02	1.71	4454.188477	7659.425	76.2199	0.9121	5.816	7.0723	0.8135	0	0	0	1.4832	7.0001	0	0.683	0	0	0	0	0	0	0	0	0	0	0	0	0	0	0	0	0	0	0	0	0	0	0	0	0	0	0	0	0	0
RPS_02	1.99	2.26	3.1	6.22	1.3	4319.320313	7659.86	80.9412	0.8382	5.0678	5.9657	0.4671	0	0	0	0.2714	6.4486	0	0	0	0	0	0	0	0	0	0	0	0	0	0	0	0	0	0	0	0	0	0	0	0	0	0	0	0	0	0	0	0
RPS_02	5.55	7.14	24.18	28.94	1.66	4418.658691	7647.7525	61.14	0	5.8426	14.277	1.2841	0	0	0	1.452	14.8948	0.2547	0.6228	0	0	0	0	0	0.232	0	0	0	0	0	0	0	0	0	0	0	0	0	0	0	0	0	0	0	0	0	0	0	0
RPS_02	1.25	2.53	1.24	5.64	4.06	4420.398926	7649.275	89.3991	1.108	6.421	0.7587	0.9287	0	0	0	0.52	0.8646	0	0	0	0	0	0	0	0	0	0	0	0	0	0	0	0	0	0	0	0	0	0	0	0	0	0	0	0	0	0	0	0
RPS_02	3.11	4.32	7.62	10.85	1.92	4343.393555	7646.375	78.2615	1.7834	13.7056	0	0.1009	0.5998	0.7805	0	0.1654	0	0	0	0	0	0	0	4.6029	0	0	0	0	0	0	0	0	0	0	0	0	0	0	0	0	0	0	0	0	0	0	0	0	0
RPS_02	1.85	2.21	2.7	6.22	1.42	4322.365723	7632.165	83.7067	0	4.5697	5.2636	0.4857	0	0	0	0.1495	5.8248	0	0	0	0	0	0	0	0	0	0	0	0	0	0	0	0	0	0	0	0	0	0	0	0	0	0	0	0	0	0	0	0
RPS_02	3.93	5.38	12.14	18.38	1.88	4371.382324	7626.655	81.4213	0.7205	5.8723	5.0265	0.432	0	0.1476	0	0.8238	5.0744	0	0.4816	0	0	0	0	0	0	0	0	0	0	0	0	0	0	0	0	0	0	0	0	0	0	0	0	0	0	0	0	0	0
RPS_02	2.13	2.43	3.56	7.23	1.3	4399.516113	7623.61	79.8125	0.6812	4.7168	6.8698	0.5207	0	0	0	0.2667	7.1322	0	0	0	0	0	0	0	0	0	0	0	0	0	0	0	0	0	0	0	0	0	0	0	0	0	0	0	0	0	0	0	0
RPS_02	2.35	3.41	4.35	10.27	2.09	4332.734619	7615.765	78.402	0.8256	4.9961	7.2043	0.5925	0	0	0	0.2295	7.7501	0	0	0	0	0	0	0	0	0	0	0	0	0	0	0	0	0	0	0	0	0	0	0	0	0	0	0	0	0	0	0	0
RPS_02	2.08	2.48	3.39	6.37	1.42	4319.900391	7615.33	76.761	0.7252	4.5913	8.3428	0.4185	0	0	0	0.2578	8.9035	0	0	0	0	0	0	0	0	0	0	0	0	0	0	0	0	0	0	0	0	0	0	0	0	0	0	0	0	0	0	0	0
RPS_02	1.74	1.88	2.37	5.35	1.17	4421.414063	7609.82	88.6149	1.3169	7.4542	0	0	0.9701	1.3093	0	0	0	0	0	0	0	0	0	0.3347	0	0	0	0	0	0	0	0	0	0	0	0	0	0	0	0	0	0	0	0	0	0	0	0	0
RPS_02	5.73	6.67	25.81	20.4	1.35	4371.672363	7596.4075	52.8695	0	6.0556	18.8015	1.1727	0	0.1336	0	0.4815	19.7383	0.2601	0.1854	0	0	0	0	0.3018	0	0	0	0	0	0	0	0	0	0	0	0	0	0	0	0	0	0	0	0	0	0	0	0	0
RPS_02	3.25	3.81	8.31	11.29	1.37	4395.890625	7590.39	64.6327	0.6737	4.8371	14.4547	0.7854	0	0	0	0.3835	14.2329	0	0	0	0	0	0	0	0	0	0	0	0	0	0	0	0	0	0	0	0	0	0	0	0	0	0	0	0	0	0	0	0
RPS_02	2.35	2.62	4.35	8.1	1.24	4372.6875	7590.39	81.0462	1.3484	10.6682	0.2754	2.439	0	0	0	1.9421	1.5059	0	0.7747	0	0	0	0	0	0	0	0	0	0	0	0	0	0	0	0	0	0	0	0	0	0	0	0	0	0	0	0	0	0
RPS_02	0.77	0.92	0.46	2.6	1.43	4398.065918	7589.1575	93.5743	0.8537	4.4064	0.4497	0.2767	0	0	0	0	0.4391	0	0	0	0	0	0	0	0	0	0	0	0	0	0	0	0	0	0	0	0	0	0	0	0	0	0	0	0	0	0	0	0
RPS_02	1.49	2.15	1.74	4.77	2.09	4458.684082	7564.5075	92.3394	1.2213	4.7665	0	0	0	0	0	0	0	0	0	0.191	0.2538	0.2938	0.9342	0	0	0	0	0	0	0	0	0	0	0	0	0	0	0	0	0	0	0	0	0	0	0	0	0	0
RPS_02	3.17	3.83	7.87	10.56	1.46	4345.133789	7556.75	70.789	0	5.5247	11.011	0.7055	0	0	0	0.6999	11.1019	0	0.1679	0	0	0	0	0	0	0	0	0	0	0	0	0	0	0	0	0	0	0	0	0	0	0	0	0	0	0	0	0	0
RPS_02	2.35	5.96	4.35	14.03	6.4	4359.490723	7542.54	93.1212	1.4791	3.4246	0.9903	0	0	0	0	0	0.9848	0	0	0	0	0	0	0	0	0	0	0	0	0	0	0	0	0	0	0	0	0	0	0	0	0	0	0	0	0	0	0	0
RPS_02	5.48	7.1	23.61	26.33	1.67	4351.07959	7537.755	57.3584	1.3909	23.1999	0.4504	0.8139	4.5355	8.9099	0	0.6261	0.3459	0.983	0.4606	0	0	0	0	0.9256	0	0	0	0	0	0	0	0	0	0	0	0	0	0	0	0	0	0	0	0	0	0	0	0	0
RPS_02	3.57	4.07	9.99	12.88	1.31	4402.561523	7522.82	62.7234	1.7751	22.4399	0	0.2077	4.7161	5.828	0	0	0	0	0	0	0	0	0	2.0968	0.213	0	0	0	0	0	0	0	0	0	0	0	0	0	0	0	0	0	0	0	0	0	0	0	0
RPS_02	10.77	16.09	91.15	40.37	2.23	4425.619629	7515.7875	51.6807	2.4319	31.3598	0.1002	1.0727	4.2274	6.4709	0	0	0	0.4984	0	0	0	0	0	2.158	0	0	0	0	0	0	0	0	0	0	0	0	0	0	0	0	0	0	0	0	0	0	0	0	0
RPS_02	2.73	2.9	5.84	8.83	1.13	4375.007813	7509.045	67.1167	1.4031	20.4212	0	0.1688	1.2112	9.3494	0	0	0	0	0	0	0	0	0	0.3297	0	0	0	0	0	0	0	0	0	0	0	0	0	0	0	0	0	0	0	0	0	0	0	0	0
RPS_02	2.68	2.88	5.63	8.54	1.16	4374.717773	7501.055	65.7073	1.4523	21.0877	0	0.1705	1.152	9.92	0	0	0	0	0	0	0	0	0	0.5102	0	0	0	0	0	0	0	0	0	0	0	0	0	0	0	0	0	0	0	0	0	0	0	0	0
RPS_02	3.29	4.2	8.5	11.14	1.63	4461.584473	7483.075	66.8549	0	6.6497	12.0486	1.2582	0	0	0	0.5357	12.6529	0	0	0	0	0	0	0	0	0	0	0	0	0	0	0	0	0	0	0	0	0	0	0	0	0	0	0	0	0	0	0	0
RPS_02	4.52	5.57	16.04	16.78	1.52	4389.509766	7471.04	60.9598	2.075	23.8885	0	0.4725	4.1538	6.09	0	0	0.36	0.2305	0.9511	0	0	0	0	0.8187	0	0	0	0	0	0	0	0	0	0	0	0	0	0	0	0	0	0	0	0	0	0	0	0	0
RPS_02	4.44	5.23	15.49	15.05	1.39	4343.393555	7457.12	50.3635	1.6603	29.2754	0	1.2193	5.9	9.6868	0	0	0.2085	0.4924	0.3785	0	0	0	0	0.8151	0	0	0	0	0	0	0	0	0	0	0	0	0	0	0	0	0	0	0	0	0	0	0	0	0
RPS_02	1.83	2.5	2.62	5.79	1.87	4362.753662	7451.9	89.1489	0.9095	3.4919	3.0436	0.125	0	0	0	0.1801	3.1009	0	0	0	0	0	0	0	0	0	0	0	0	0	0	0	0	0	0	0	0	0	0	0	0	0	0	0	0	0	0	0	0
RPS_02	2.89	4.2	6.57	10.85	2.1	4355.865234	7448.71	74.9639	0.567	4.5161	9.349	0.497	0	0	0	0.245	9.8621	0	0	0	0	0	0	0	0	0	0	0	0	0	0	0	0	0	0	0	0	0	0	0	0	0	0	0	0	0	0	0	0
RPS_02	3.5	4.09	9.61	12.15	1.37	4345.858887	7436.53	65.8217	1.6778	20.4543	0.2025	0.4072	3.4222	6.0853	0	0	0	0.3444	0	0	0	0	0	1.5847	0	0	0	0	0	0	0	0	0	0	0	0	0	0	0	0	0	0	0	0	0	0	0	0	0
RPS_02	1.6	1.83	2.01	5.21	1.31	4370.222168	7416.5925	87.0545	0.5521	4.4837	4.0087	0.2153	0	0	0	0	3.6857	0	0	0	0	0	0	0	0	0	0	0	0	0	0	0	0	0	0	0	0	0	0	0	0	0	0	0	0	0	0	0	0
RPS_02	1.72	2.81	2.32	6.51	2.67	4372.397461	7416.665	88.0546	0.9142	3.9466	3.5193	0.1313	0	0	0	0	3.434	0	0	0	0	0	0	0	0	0	0	0	0	0	0	0	0	0	0	0	0	0	0	0	0	0	0	0	0	0	0	0	0
RPS_02	1.97	2.98	3.06	7.38	2.29	4361.375977	7413.185	90.5811	0.9251	4.1728	2.1527	0.1157	0	0	0	0	2.0525	0	0	0	0	0	0	0	0	0	0	0	0	0	0	0	0	0	0	0	0	0	0	0	0	0	0	0	0	0	0	0	0
RPS_02	2.04	2.5	3.27	6.66	1.5	4384.434082	7411.155	84.0144	0.5492	4.5065	4.6246	0.5039	0	0	0	0.4597	5.0429	0	0.2988	0	0	0	0	0	0	0	0	0	0	0	0	0	0	0	0	0	0	0	0	0	0	0	0	0	0	0	0	0	0
RPS_02	2.82	4.24	6.26	15.19	2.25	4370.222168	7410.575	81.8434	0.9502	8.3574	2.0216	1.0737	0	0.1482	0	2.38	1.7925	0.1889	1.2441	0	0	0	0	0	0	0	0	0	0	0	0	0	0	0	0	0	0	0	0	0	0	0	0	0	0	0	0	0	0
RPS_02	2.27	3.76	4.06	8.68	2.73	4349.919434	7401.005	89.4606	1.0597	3.6136	2.7772	0.1118	0	0	0	0.1498	2.8273	0	0	0	0	0	0	0	0	0	0	0	0	0	0	0	0	0	0	0	0	0	0	0	0	0	0	0	0	0	0	0	0
RPS_02	1.41	1.79	1.57	4.34	1.6	4352.529785	7376.5575	92.8484	1.014	3.0864	1.3149	0	0	0	0	0.1341	1.6023	0	0	0	0	0	0	0	0	0	0	0	0	0	0	0	0	0	0	0	0	0	0	0	0	0	0	0	0	0	0	0	0
RPS_02	3.66	4.26	10.53	12.59	1.35	4364.131348	7366.19	69.3342	1.9899	18.0753	0	0.487	0.4286	1.2209	0	0	0.3051	0	7.8386	0	0	0	0	0.3204	0	0	0	0	0	0	0	0	0	0	0	0	0	0	0	0	0	0	0	0	0	0	0	0	0
RPS_02	2.61	4.26	5.36	12.15	2.65	4339.623047	7363.87	89.4462	1.1853	6.125	1.1868	0.2194	0	0	0	0.5392	1.0836	0	0.2144	0	0	0	0	0	0	0	0	0	0	0	0	0	0	0	0	0	0	0	0	0	0	0	0	0	0	0	0	0	0
RPS_02	4.35	5.58	14.86	14.9	1.65	4449.765381	7359.4475	79.66	2.0091	13.1099	0.4239	0.5238	0.6883	0.9402	0	0	0.93	0	1.4305	0	0	0	0	0.2842	0	0	0	0	0	0	0	0	0	0	0	0	0	0	0	0	0	0	0	0	0	0	0	0	0
RPS_02	2.99	3.37	7.03	12.44	1.26	4424.894531	7355.605	76.4226	0.9472	7.599	6.0089	0.7217	0	0	0	1.3021	6.4143	0	0.5842	0	0	0	0	0	0	0	0	0	0	0	0	0	0	0	0	0	0	0	0	0	0	0	0	0	0	0	0	0	0
RPS_02	2.26	2.75	4.02	7.38	1.47	4334.402344	7349.515	85.7466	0.931	3.4439	4.6219	0.1306	0	0	0	0.1578	4.9682	0	0	0	0	0	0	0	0	0	0	0	0	0	0	0	0	0	0	0	0	0	0	0	0	0	0	0	0	0	0	0	0
RPS_02	1.97	2.43	3.06	6.51	1.51	4341.363281	7347.485	92.9305	1.3496	3.4496	1.1207	0	0	0	0	0	1.1497	0	0	0	0	0	0	0	0	0	0	0	0	0	0	0	0	0	0	0	0	0	0	0	0	0	0	0	0	0	0	0	0
RPS_02	1.64	1.88	2.11	5.21	1.31	4432.580566	7345.5275	87.8066	0.9738	4.3162	3.392	0.1613	0	0	0	0	3.3501	0	0	0	0	0	0	0	0	0	0	0	0	0	0	0	0	0	0	0	0	0	0	0	0	0	0	0	0	0	0	0	0
RPS_02	1.56	1.81	1.9	4.63	1.36	4435.625977	7343.4975	90.6769	0.9969	3.6181	2.2967	0.1233	0	0	0	0	2.2881	0	0	0	0	0	0	0	0	0	0	0	0	0	0	0	0	0	0	0	0	0	0	0	0	0	0	0	0	0	0	0	0
RPS_02	3.57	3.95	10.03	12.15	1.22	4436.351074	7340.67	70.4638	0.6148	7.2339	8.8834	0.9083	0	0	0	1.645	9.4253	0.1715	0.6541	0	0	0	0	0	0	0	0	0	0	0	0	0	0	0	0	0	0	0	0	0	0	0	0	0	0	0	0	0	0
RPS_02	4.81	6.96	18.15	17.51	2.1	4364.421387	7329.65	50.7876	1.9834	26.9367	0.1146	0	4.6463	12.011	0	0	0	3.289	0	0	0	0	0	0.2313	0	0	0	0	0	0	0	0	0	0	0	0	0	0	0	0	0	0	0	0	0	0	0	0	0
RPS_02	4.35	6.67	14.86	19.24	2.35	4387.479492	7308.2625	69.1602	0.8254	6.8279	10.1614	1.3203	0	0	0	0.7833	10.9213	0	0	0	0	0	0	0	0	0	0	0	0	0	0	0	0	0	0	0	0	0	0	0	0	0	0	0	0	0	0	0	0
RPS_02	2.3	2.56	4.14	8.1	1.25	4331.356934	7293.545	85.7272	0.9109	4.3958	3.9823	0.3177	0	0	0	0.4206	4.2454	0	0	0	0	0	0	0	0	0	0	0	0	0	0	0	0	0	0	0	0	0	0	0	0	0	0	0	0	0	0	0	0
RPS_02	2.45	3.13	4.71	8.1	1.63	4314.889648	7380.545	72.7991	0	4.7781	10.3848	0.7557	0	0	0	0.4517	10.8306	0	0	0	0	0	0	0	0	0	0	0	0	0	0	0	0	0	0	0	0	0	0	0	0	0	0	0	0	0	0	0	0
RPS_02	2.52	3.34	5	11.14	1.75	4254.271484	7362.275	81.1405	1.273	12.4093	0.6068	0.4641	1.1828	2.1308	0	0.1368	0.2628	0	0	0	0	0	0	0.3933	0	0	0	0	0	0	0	0	0	0	0	0	0	0	0	0	0	0	0	0	0	0	0	0	0
RPS_02	2.36	2.78	4.38	7.67	1.39	4252.53125	7359.665	73.0301	1.312	17.155	0.7312	0.4087	2.1947	3.9043	0	0	0.2222	0.298	0	0	0	0	0	0.744	0	0	0	0	0	0	0	0	0	0	0	0	0	0	0	0	0	0	0	0	0	0	0	0	0
RPS_02	3.44	4.21	9.27	13.31	1.5	4288.496094	7358.94	62.0929	1.4624	22.9613	0.1084	0.1662	1.1153	11.6617	0	0	0	0	0	0	0	0	0	0.4318	0	0	0	0	0	0	0	0	0	0	0	0	0	0	0	0	0	0	0	0	0	0	0	0	0
RPS_02	4.37	5.69	15.01	14.32	1.69	4176.686035	7354.8075	63.5451	1.639	22.5352	0	0.1125	5.2729	5.604	0	0	0	0.1898	0	0	0	0	0	1.1014	0	0	0	0	0	0	0	0	0	0	0	0	0	0	0	0	0	0	0	0	0	0	0	0	0
RPS_02	3.52	4.01	9.73	11.58	1.3	4292.556641	7355.605	63.0882	1.6874	23.4154	0	0	4.8514	5.8145	0	0	0.2172	0	0	0	0	0	0.2525	0.6732	0	0	0	0	0	0	0	0	0	0	0	0	0	0	0	0	0	0	0	0	0	0	0	0	0
RPS_02	2.24	2.56	3.94	7.23	1.31	4233.678711	7356.04	78.4887	0.5171	5.8206	6.746	0.8076	0	0	0	0.5722	6.8436	0	0.2041	0	0	0	0	0	0	0	0	0	0	0	0	0	0	0	0	0	0	0	0	0	0	0	0	0	0	0	0	0	0
RPS_02	3.73	4.49	10.93	13.6	1.45	4189.592773	7350.53	63.2155	1.7585	22.6366	0.1269	0.6406	3.5125	6.5024	0	0	0	0.3264	0.2842	0	0	0	0	0.9964	0	0	0	0	0	0	0	0	0	0	0	0	0	0	0	0	0	0	0	0	0	0	0	0	0
RPS_02	3.6	4.34	10.17	11.72	1.45	4264.132813	7349.515	66.1206	1.8141	20.8209	0	0.2498	3.6661	5.7626	0	0	0	0.2297	0	0	0	0	0	1.3362	0	0	0	0	0	0	0	0	0	0	0	0	0	0	0	0	0	0	0	0	0	0	0	0	0
RPS_02	1.69	2.02	2.24	5.35	1.42	4225.992676	7349.1525	80.431	1.1457	11.7656	0	0.4717	1.8607	3.4411	0	0	0	0.373	0	0	0	0	0	0.5111	0	0	0	0	0	0	0	0	0	0	0	0	0	0	0	0	0	0	0	0	0	0	0	0	0
RPS_02	1.62	2.15	2.05	5.5	1.77	4283.710449	7345.2375	87.2112	0.8291	8.7471	0	0	0.6836	2.2013	0	0	0	0	0	0	0	0	0	0.3278	0	0	0	0	0	0	0	0	0	0	0	0	0	0	0	0	0	0	0	0	0	0	0	0	0
RPS_02	4.66	5.67	17.08	16.49	1.48	4285.813232	7343.425	63.4672	1.7443	23.0458	0	0	1.0848	9.6771	0	0	0	0	0.2866	0	0	0	0	0.4703	0.2239	0	0	0	0	0	0	0	0	0	0	0	0	0	0	0	0	0	0	0	0	0	0	0	0
RPS_02	4.81	6.45	18.19	21.41	1.79	4192.203125	7327.04	80.0264	1.5258	12.5566	1.6419	0.6208	0.5526	1.2602	0	0.2643	1.0779	0	0.2059	0	0	0	0	0.2675	0	0	0	0	0	0	0	0	0	0	0	0	0	0	0	0	0	0	0	0	0	0	0	0	0
RPS_02	4.42	5.35	15.32	14.18	1.47	4222.367188	7324.865	59.2723	2.1071	24.7724	0.1354	0.2558	3.7911	7.2459	0	0	0	0.3312	0	0	0	0	0	2.0887	0	0	0	0	0	0	0	0	0	0	0	0	0	0	0	0	0	0	0	0	0	0	0	0	0
RPS_02	7.13	8.46	39.9	24.45	1.41	4263.262695	7312.6125	40.3712	2.5263	36.5979	0	3.8194	5.0675	5.9864	0	0	0	0	0	0	0	0	0.2184	5.413	0	0	0	0	0	0	0	0	0	0	0	0	0	0	0	0	0	0	0	0	0	0	0	0	0
RPS_02	1.59	2.56	1.99	6.22	2.59	4182.776855	7311.67	91.7515	0.6734	4.272	1.6782	0	0	0	0	0	1.6249	0	0	0	0	0	0	0	0	0	0	0	0	0	0	0	0	0	0	0	0	0	0	0	0	0	0	0	0	0	0	0	0
RPS_02	0.98	1.13	0.75	2.89	1.33	4184.51709	7312.1775	91.3454	1.0229	4.074	1.8976	0	0	0	0	0	1.6601	0	0	0	0	0	0	0	0	0	0	0	0	0	0	0	0	0	0	0	0	0	0	0	0	0	0	0	0	0	0	0	0
RPS_02	1.42	1.83	1.59	4.92	1.65	4185.967285	7311.4525	92.2502	0.9453	3.077	1.9401	0	0	0	0	0	1.7874	0	0	0	0	0	0	0	0	0	0	0	0	0	0	0	0	0	0	0	0	0	0	0	0	0	0	0	0	0	0	0	0
RPS_02	4.62	5.73	16.75	16.35	1.54	4202.789551	7308.5525	57.2537	1.5745	24.0288	0.7303	0.6866	4.6671	7.6074	0	0.2257	0.6126	0.9812	0	0	0	0	0.6217	1.0104	0	0	0	0	0	0	0	0	0	0	0	0	0	0	0	0	0	0	0	0	0	0	0	0	0
RPS_02	1.52	1.75	1.82	4.92	1.32	4181.761719	7309.5675	86.7325	0.7083	2.9926	4.6551	0	0	0	0	0	4.9115	0	0	0	0	0	0	0	0	0	0	0	0	0	0	0	0	0	0	0	0	0	0	0	0	0	0	0	0	0	0	0	0
RPS_02	1.36	1.65	1.44	4.05	1.48	4186.692383	7309.4225	93.2704	0.8378	3.3004	1.4258	0	0	0	0	0	1.1656	0	0	0	0	0	0	0	0	0	0	0	0	0	0	0	0	0	0	0	0	0	0	0	0	0	0	0	0	0	0	0	0
RPS_02	1.21	1.37	1.15	3.76	1.29	4182.486816	7308.2625	91.8182	0.8587	2.9505	2.2277	0	0	0	0	0	2.145	0	0	0	0	0	0	0	0	0	0	0	0	0	0	0	0	0	0	0	0	0	0	0	0	0	0	0	0	0	0	0	0
RPS_02	1.19	1.36	1.11	3.62	1.32	4186.402344	7307.9725	94.7761	0.7205	2.5703	1.0151	0	0	0	0	0	0.918	0	0	0	0	0	0	0	0	0	0	0	0	0	0	0	0	0	0	0	0	0	0	0	0	0	0	0	0	0	0	0	0
RPS_02	1.42	1.77	1.59	4.63	1.54	4184.807129	7306.9575	92.2991	0.5144	3.8075	1.7494	0	0	0	0	0	1.6296	0	0	0	0	0	0	0	0	0	0	0	0	0	0	0	0	0	0	0	0	0	0	0	0	0	0	0	0	0	0	0	0
RPS_02	1.79	2.11	2.51	6.08	1.39	4275.444336	7285.86	82.0023	0.8996	5.7745	4.6888	0.6717	0	0	0	0.833	4.7391	0	0.391	0	0	0	0	0	0	0	0	0	0	0	0	0	0	0	0	0	0	0	0	0	0	0	0	0	0	0	0	0	0
RPS_02	2.63	3.07	5.42	8.97	1.36	4060.010254	7389.39	85.422	1.1211	2.9256	5.1345	0.1206	0	0	0	0	5.2762	0	0	0	0	0	0	0	0	0	0	0	0	0	0	0	0	0	0	0	0	0	0	0	0	0	0	0	0	0	0	0	0
RPS_02	2.74	2.98	5.9	8.54	1.18	4105.691406	7385.91	76.9933	0.8717	4.0969	8.4803	0.2207	0	0	0	0.3277	9.0094	0	0	0	0	0	0	0	0	0	0	0	0	0	0	0	0	0	0	0	0	0	0	0	0	0	0	0	0	0	0	0	0
RPS_02	2.63	3.62	5.44	8.83	1.89	4057.689941	7381.85	84.6915	1.0635	3.0943	5.5256	0.2275	0	0	0	0	5.3977	0	0	0	0	0	0	0	0	0	0	0	0	0	0	0	0	0	0	0	0	0	0	0	0	0	0	0	0	0	0	0	0
RPS_02	5.64	7.57	25.02	19.82	1.8	4162.829102	7366.8425	50.144	1.8584	29.7575	0.1234	0.2084	6.6863	9.8079	0	0	0	0.2399	0	0.324	0	0	0	0.85	0	0	0	0	0	0	0	0	0	0	0	0	0	0	0	0	0	0	0	0	0	0	0	0	0
RPS_02	3.35	3.95	8.83	12.15	1.39	4041.882813	7350.82	58.9047	1.8441	25.0428	0.1184	0.2569	5.4149	6.6991	0	0	0	0.2016	0	0	0	0	0.2178	1.2998	0	0	0	0	0	0	0	0	0	0	0	0	0	0	0	0	0	0	0	0	0	0	0	0	0
RPS_02	2.08	2.58	3.39	6.66	1.54	4161.088867	7350.24	79.1651	0.7717	5.7736	6.3412	0.7352	0	0	0	0.407	6.6482	0.158	0	0	0	0	0	0	0	0	0	0	0	0	0	0	0	0	0	0	0	0	0	0	0	0	0	0	0	0	0	0	0
RPS_02	2.51	3.86	4.94	9.26	2.37	4153.692871	7342.41	77.9318	1.3625	14.0023	0	0.15	2.6941	3.493	0	0	0	0	0	0	0	0	0	0.3664	0	0	0	0	0	0	0	0	0	0	0	0	0	0	0	0	0	0	0	0	0	0	0	0	0
RPS_02	2.63	3.24	5.42	8.97	1.52	4156.448242	7337.625	77.4694	1.29	14.8897	0.2718	0	2.9145	2.9863	0	0	0	0.1782	0	0	0	0	0	0	0	0	0	0	0	0	0	0	0	0	0	0	0	0	0	0	0	0	0	0	0	0	0	0	0
RPS_02	1.98	2.59	3.08	6.95	1.71	4133.100098	7329.65	82.8215	0.5914	3.7764	6.1252	0.1659	0	0	0	0.2275	6.2921	0	0	0	0	0	0	0	0	0	0	0	0	0	0	0	0	0	0	0	0	0	0	0	0	0	0	0	0	0	0	0	0
RPS_02	1.45	1.75	1.65	4.63	1.45	4037.822266	7325.2275	91.7488	0.7933	4.4173	1.3994	0.2126	0	0	0	0	1.4286	0	0	0	0	0	0	0	0	0	0	0	0	0	0	0	0	0	0	0	0	0	0	0	0	0	0	0	0	0	0	0	0
RPS_02	1.55	2.53	1.88	5.5	2.66	4159.203613	7317.905	91.0517	1.0704	6.0806	0	0	0.1197	1.6776	0	0	0	0	0	0	0	0	0	0	0	0	0	0	0	0	0	0	0	0	0	0	0	0	0	0	0	0	0	0	0	0	0	0	0
RPS_02	1.43	2.11	1.61	5.5	2.16	4107.286621	7316.455	91.4738	0.8011	4.9334	1.0261	0.5246	0	0	0	0.2625	0.9784	0	0	0	0	0	0	0	0	0	0	0	0	0	0	0	0	0	0	0	0	0	0	0	0	0	0	0	0	0	0	0	0
RPS_02	1.84	2.21	2.66	6.08	1.44	4103.226074	7315.875	79.0093	0.6974	3.6239	8.1769	0.2063	0	0	0	0.2508	8.0352	0	0	0	0	0	0	0	0	0	0	0	0	0	0	0	0	0	0	0	0	0	0	0	0	0	0	0	0	0	0	0	0
RPS_02	2.93	3.24	6.72	9.69	1.22	4032.601563	7312.25	67.1793	0	6.2587	12.3108	0.9706	0	0	0	0.3991	12.8814	0	0	0	0	0	0	0	0	0	0	0	0	0	0	0	0	0	0	0	0	0	0	0	0	0	0	0	0	0	0	0	0
RPS_02	3.63	5.12	10.34	20.98	1.99	4035.791992	7307.9	79.0914	0.8777	4.4708	7.4202	0.3078	0	0	0	0.2174	7.6147	0	0	0	0	0	0	0	0	0	0	0	0	0	0	0	0	0	0	0	0	0	0	0	0	0	0	0	0	0	0	0	0
RPS_02	4.27	4.85	14.34	15.19	1.29	4095.540039	7287.31	57.8559	0	6.8496	15.4798	1.324	0	0	0	1.3099	16.4812	0.1542	0.5456	0	0	0	0	0	0	0	0	0	0	0	0	0	0	0	0	0	0	0	0	0	0	0	0	0	0	0	0	0	0
RPS_02	2.24	2.61	3.96	7.96	1.35	4097.860352	7279.045	87.01	1.0488	4.8178	2.6186	0.5373	0	0	0	0.9287	2.7046	0	0.3341	0	0	0	0	0	0	0	0	0	0	0	0	0	0	0	0	0	0	0	0	0	0	0	0	0	0	0	0	0	0
RPS_02	2.82	3.37	6.26	9.26	1.42	4007.143066	7384.75	73.9096	0.7193	4.2922	10.0806	0.3422	0	0	0	0.4168	10.2394	0	0	0	0	0	0	0	0	0	0	0	0	0	0	0	0	0	0	0	0	0	0	0	0	0	0	0	0	0	0	0	0
RPS_02	4.59	5.08	16.58	14.9	1.22	3922.886719	7382.14	52.568	0	3.9786	21.1646	0.5448	0	0	0	0.2523	21.4916	0	0	0	0	0	0	0	0	0	0	0	0	0	0	0	0	0	0	0	0	0	0	0	0	0	0	0	0	0	0	0	0
RPS_02	1.59	2.05	1.99	5.35	1.65	4012.798828	7382.7925	89.6145	0.8756	3.6337	2.7266	0.1971	0	0	0	0	2.9525	0	0	0	0	0	0	0	0	0	0	0	0	0	0	0	0	0	0	0	0	0	0	0	0	0	0	0	0	0	0	0	0
RPS_02	3.46	4.79	9.4	11.29	1.92	3914.548096	7349.8775	66.0595	0.8994	6.5943	12.1673	1.009	0	0	0	0.7109	12.5596	0	0	0	0	0	0	0	0	0	0	0	0	0	0	0	0	0	0	0	0	0	0	0	0	0	0	0	0	0	0	0	0
RPS_02	3	3.9	7.05	9.84	1.69	3952.615723	7336.175	65.0849	0.6006	6.1102	12.4223	1.1705	0	0	0	0.9842	13.0332	0.2696	0.3244	0	0	0	0	0	0	0	0	0	0	0	0	0	0	0	0	0	0	0	0	0	0	0	0	0	0	0	0	0	0
RPS_02	2.06	2.43	3.33	6.51	1.39	3890.692383	7336.465	77.8638	0.8288	3.4744	8.4824	0.3201	0	0	0	0.1767	8.8538	0	0	0	0	0	0	0	0	0	0	0	0	0	0	0	0	0	0	0	0	0	0	0	0	0	0	0	0	0	0	0	0
RPS_02	1.49	1.76	1.74	4.92	1.4	3992.786133	7336.2475	91.1773	1.106	4.3571	1.7239	0.1647	0	0	0	0	1.471	0	0	0	0	0	0	0	0	0	0	0	0	0	0	0	0	0	0	0	0	0	0	0	0	0	0	0	0	0	0	0	0
RPS_02	3.8	4.69	11.35	17.65	1.52	3913.31543	7331.39	70.8186	0.6009	6.979	9.2017	0.9033	0	0	0	1.0977	9.6614	0.1947	0.5427	0	0	0	0	0	0	0	0	0	0	0	0	0	0	0	0	0	0	0	0	0	0	0	0	0	0	0	0	0	0
RPS_02	1.99	2.26	3.12	6.08	1.29	3875.320313	7326.17	74.688	0	4.7948	9.3393	0.6824	0	0	0	0.4833	10.0122	0	0	0	0	0	0	0	0	0	0	0	0	0	0	0	0	0	0	0	0	0	0	0	0	0	0	0	0	0	0	0	0
RPS_02	5.41	7.1	22.99	19.24	1.72	4005.837891	7299.4175	47.2153	2.0249	31.0532	0.2566	0.7273	6.7534	9.1199	0	0	0	0.9279	0	0.1776	0	0	0	1.5154	0.2285	0	0	0	0	0	0	0	0	0	0	0	0	0	0	0	0	0	0	0	0	0	0	0	0
RPS_02	7.66	10.95	46.12	32.27	2.04	3812.446777	7384.17	41.9977	2.0989	33.5627	0.2527	0.597	8.117	10.1585	0	0	0	2.0937	0	0	0	0	0	1.1219	0	0	0	0	0	0	0	0	0	0	0	0	0	0	0	0	0	0	0	0	0	0	0	0	0
RPS_02	1.69	1.93	2.24	6.22	1.31	3791.999023	7375.47	86.4165	0.8338	5.6291	3.324	0.4665	0	0	0	0.2974	3.0327	0	0	0	0	0	0	0	0	0	0	0	0	0	0	0	0	0	0	0	0	0	0	0	0	0	0	0	0	0	0	0	0
RPS_02	2.97	3.44	6.93	9.98	1.34	3797.799805	7367.64	62.812	0	5.7984	14.7146	0.9126	0.1257	0	0	0.2918	15.3449	0	0	0	0	0	0	0	0	0	0	0	0	0	0	0	0	0	0	0	0	0	0	0	0	0	0	0	0	0	0	0	0
RPS_02	2	2.39	3.14	6.51	1.42	3821.728027	7364.16	83.4051	0.9155	4.8646	4.9617	0.5012	0	0	0	0.3543	4.9977	0	0	0	0	0	0	0	0	0	0	0	0	0	0	0	0	0	0	0	0	0	0	0	0	0	0	0	0	0	0	0	0
RPS_02	1.93	2.61	2.93	7.67	1.82	3805.630859	7356.91	83.7406	0.8427	4.7135	5.1842	0.1936	0	0	0	0	5.3254	0	0	0	0	0	0	0	0	0	0	0	0	0	0	0	0	0	0	0	0	0	0	0	0	0	0	0	0	0	0	0	0
RPS_02	1.48	1.69	1.72	4.63	1.3	3855.662598	7356.9825	91.8156	1.2114	3.7402	1.2451	0.2771	0	0	0	0.1615	1.549	0	0	0	0	0	0	0	0	0	0	0	0	0	0	0	0	0	0	0	0	0	0	0	0	0	0	0	0	0	0	0	0
RPS_02	3.05	5.57	7.33	18.23	3.32	3804.325684	7354.01	82.275	0.8122	4.8781	5.4904	0.325	0	0	0	0.3162	5.9031	0	0	0	0	0	0	0	0	0	0	0	0	0	0	0	0	0	0	0	0	0	0	0	0	0	0	0	0	0	0	0	0
RPS_02	7.35	10.13	42.39	42.68	1.9	3846.453857	7348.355	59.3079	0	6.734	15.6849	0.8138	0	0	0	0.9114	15.9166	0.1922	0.4392	0	0	0	0	0	0	0	0	0	0	0	0	0	0	0	0	0	0	0	0	0	0	0	0	0	0	0	0	0	0
RPS_02	2.95	3.24	6.85	9.69	1.2	3796.639648	7339.51	58.5396	0	5.6961	16.8248	0.8444	0	0	0	0.382	17.7132	0	0	0	0	0	0	0	0	0	0	0	0	0	0	0	0	0	0	0	0	0	0	0	0	0	0	0	0	0	0	0	0
RPS_02	3.01	3.52	7.12	10.13	1.37	3808.241211	7331.1	69.4124	0.8661	7.5917	9.3775	1.673	0	0	0	0.6149	10.4644	0	0	0	0	0	0	0	0	0	0	0	0	0	0	0	0	0	0	0	0	0	0	0	0	0	0	0	0	0	0	0	0
RPS_02	5.13	6.09	20.7	19.82	1.4	3799.830078	7319.1375	47.6798	0	6.1217	20.4641	1.3949	0.1447	0	0	1.4598	21.9056	0.2574	0.5721	0	0	0	0	0	0	0	0	0	0	0	0	0	0	0	0	0	0	0	0	0	0	0	0	0	0	0	0	0	0
RPS_02	1.45	1.62	1.65	4.49	1.24	3856.097656	7309.4225	91.9807	0.8195	3.4403	1.685	0.1181	0	0	0	0.1464	1.81	0	0	0	0	0	0	0	0	0	0	0	0	0	0	0	0	0	0	0	0	0	0	0	0	0	0	0	0	0	0	0	0
RPS_02	2.8	3.82	6.15	10.56	1.86	3804.180664	7308.19	74.2591	0.6973	7.8145	6.4623	1.3605	0	0	0	1.588	6.8715	0.2003	0.7464	0	0	0	0	0	0	0	0	0	0	0	0	0	0	0	0	0	0	0	0	0	0	0	0	0	0	0	0	0	0
RPS_02	3.08	3.83	7.45	11.58	1.55	3728.625488	7300.07	65.235	0.5333	8.0815	10.6458	1.4101	0	0	0	1.3877	11.9155	0.2057	0.5854	0	0	0	0	0	0	0	0	0	0	0	0	0	0	0	0	0	0	0	0	0	0	0	0	0	0	0	0	0	0
RPS_02	6.41	8.27	32.3	24.6	1.66	3768.21582	7280.1325	57.4293	0	5.5922	16.671	0.8848	0	0	0	1.0781	17.7155	0.1967	0.4323	0	0	0	0	0	0	0	0	0	0	0	0	0	0	0	0	0	0	0	0	0	0	0	0	0	0	0	0	0	0
RPS_02	2.46	2.85	4.75	8.1	1.35	3853.704834	7479.8125	82.4917	1.5969	10.7637	0	0.1405	1.2313	1.5564	0	0	0	0	0	0	0	0	0	1.9768	0.2426	0	0	0	0	0	0	0	0	0	0	0	0	0	0	0	0	0	0	0	0	0	0	0	0
RPS_02	1.77	2.21	2.45	6.08	1.56	3836.375	7476.9125	89.3226	1.0376	3.8105	2.7774	0	0	0	0	0.1582	2.8936	0	0	0	0	0	0	0	0	0	0	0	0	0	0	0	0	0	0	0	0	0	0	0	0	0	0	0	0	0	0	0	0
RPS_02	2.02	2.29	3.2	6.22	1.28	3727.102783	7475.7525	77.9514	0.7821	2.8838	8.9892	0.1212	0	0	0	0	9.2723	0	0	0	0	0	0	0	0	0	0	0	0	0	0	0	0	0	0	0	0	0	0	0	0	0	0	0	0	0	0	0	0
RPS_02	2.06	2.29	3.33	6.51	1.23	3818.247559	7470.46	79.5608	0.8807	4.727	6.6205	0.4624	0	0	0	0.4619	7.2868	0	0	0	0	0	0	0	0	0	0	0	0	0	0	0	0	0	0	0	0	0	0	0	0	0	0	0	0	0	0	0	0
RPS_02	3.11	3.48	7.6	10.56	1.25	3781.267578	7438.85	65.1386	0	5.6088	12.815	0.6582	0	0	0	1.4222	13.2112	0.2517	0.8943	0	0	0	0	0	0	0	0	0	0	0	0	0	0	0	0	0	0	0	0	0	0	0	0	0	0	0	0	0	0
RPS_02	6.05	7.2	28.78	32.27	1.41	3757.629395	7430.8025	44.7833	1.6421	28.5241	1.3253	0.5479	6.9089	11.0626	0	0.2752	1.1193	0.6841	0.4186	0.3013	0	0	0.2255	1.784	0.3979	0	0	0	0	0	0	0	0	0	0	0	0	0	0	0	0	0	0	0	0	0	0	0	0
RPS_02	2.79	3.24	6.13	8.97	1.34	3783.87793	7428.7	68.3899	0.7072	6.4741	10.7535	1.2368	0	0	0	0.3825	12.0561	0	0	0	0	0	0	0	0	0	0	0	0	0	0	0	0	0	0	0	0	0	0	0	0	0	0	0	0	0	0	0	0
RPS_02	1.35	1.65	1.42	4.49	1.5	3866.974121	7423.9875	92.9214	1.1226	3.3527	1.3514	0	0	0	0	0	1.2518	0	0	0	0	0	0	0	0	0	0	0	0	0	0	0	0	0	0	0	0	0	0	0	0	0	0	0	0	0	0	0	0
RPS_02	4.53	6.11	16.12	22.43	1.82	3846.236328	7418.6225	58.911	0	5.7839	16.5013	1.0301	0	0	0	0.6581	17.1156	0	0	0	0	0	0	0	0	0	0	0	0	0	0	0	0	0	0	0	0	0	0	0	0	0	0	0	0	0	0	0	0
RPS_02	3.82	4.28	11.45	12.59	1.25	3747.478027	7418.115	53.4133	1.9492	27.4275	0.122	1.0281	5.5291	7.7374	0	0	0	0.2751	0	0.1994	0	0	0	2.3191	0	0	0	0	0	0	0	0	0	0	0	0	0	0	0	0	0	0	0	0	0	0	0	0	0
RPS_02	1.33	1.57	1.38	4.2	1.39	3786.488281	7412.8225	92.3005	0.7551	3.7326	1.5204	0.207	0	0	0	0	1.4843	0	0	0	0	0	0	0	0	0	0	0	0	0	0	0	0	0	0	0	0	0	0	0	0	0	0	0	0	0	0	0	0
RPS_02	1.86	2.33	2.72	6.22	1.57	3754.583984	7412.17	83.6367	0.6432	5.7346	4.498	0.5515	0	0	0	0.346	4.5901	0	0	0	0	0	0	0	0	0	0	0	0	0	0	0	0	0	0	0	0	0	0	0	0	0	0	0	0	0	0	0	0
RPS_02	2.12	2.41	3.54	6.95	1.29	3783.442871	7400.86	76.9803	0.5127	6.1828	7.53	0.5603	0	0	0	0.3391	7.8948	0	0	0	0	0	0	0	0	0	0	0	0	0	0	0	0	0	0	0	0	0	0	0	0	0	0	0	0	0	0	0	0
RPS_02	2.66	3.36	5.55	10.13	1.59	3789.098633	7399.7	80.2195	1.4807	12.002	0	0.3623	1.7031	3.0246	0	0.3432	0	0.1943	0	0	0	0	0	0.6702	0	0	0	0	0	0	0	0	0	0	0	0	0	0	0	0	0	0	0	0	0	0	0	0	0
RPS_02	2.72	3.52	5.82	10.13	1.68	3748.203125	7397.38	83.5996	1.0293	8.6591	2.025	1.2846	0	0	0	0.3602	3.0422	0	0	0	0	0	0	0	0	0	0	0	0	0	0	0	0	0	0	0	0	0	0	0	0	0	0	0	0	0	0	0	0
RPS_02	4.4	5.05	15.18	16.2	1.32	3756.759277	7396.075	57.6274	0	5.5716	16.7494	0.9893	0	0	0	0.6815	18.0645	0	0.3162	0	0	0	0	0	0	0	0	0	0	0	0	0	0	0	0	0	0	0	0	0	0	0	0	0	0	0	0	0	0
RPS_02	1.82	2.41	2.6	6.08	1.75	3762.850098	7395.06	82.6247	0.6742	5.7671	4.5174	0.7916	0	0	0	0.5645	5.0605	0	0	0	0	0	0	0	0	0	0	0	0	0	0	0	0	0	0	0	0	0	0	0	0	0	0	0	0	0	0	0	0
RPS_02	2.73	3.79	5.84	12.15	1.93	3807.081055	7619.68	81.7434	0.8689	6.5726	4.5447	0.8811	0	0	0	0.3244	5.0649	0	0	0	0	0	0	0	0	0	0	0	0	0	0	0	0	0	0	0	0	0	0	0	0	0	0	0	0	0	0	0	0
RPS_02	3.05	3.63	7.33	9.69	1.41	3735.151367	7604.02	71.6233	1.3262	16.3895	0.2972	0.1709	4.1805	4.8406	0	0	0	0.6815	0	0	0	0	0	0.4904	0	0	0	0	0	0	0	0	0	0	0	0	0	0	0	0	0	0	0	0	0	0	0	0	0
RPS_02	2.56	2.88	5.15	8.54	1.27	3749.218262	7601.41	77.4126	0.9367	5.3811	7.5285	0.5759	0	0	0	0.2634	7.9018	0	0	0	0	0	0	0	0	0	0	0	0	0	0	0	0	0	0	0	0	0	0	0	0	0	0	0	0	0	0	0	0
RPS_02	4.79	5.55	17.98	17.8	1.34	3748.203125	7587.4175	57.7188	1.8198	24.4318	0.1209	1.4337	3.9629	7.4629	0	0.1422	0.5427	0.6491	0.7914	0	0	0	0	0.9238	0	0	0	0	0	0	0	0	0	0	0	0	0	0	0	0	0	0	0	0	0	0	0	0	0
RPS_02	3.18	3.58	7.96	10.13	1.26	3765.17041	7587.1275	67.8779	0.5825	4.5223	12.9639	0.5996	0	0	0	0.2361	13.2178	0	0	0	0	0	0	0	0	0	0	0	0	0	0	0	0	0	0	0	0	0	0	0	0	0	0	0	0	0	0	0	0
RPS_02	3.31	5.55	8.63	20.98	2.8	3809.836426	7582.9225	86.4274	1.4777	6.4386	2.1503	0.4358	0	0	0	0.5447	2.2666	0	0.2589	0	0	0	0	0	0	0	0	0	0	0	0	0	0	0	0	0	0	0	0	0	0	0	0	0	0	0	0	0	0
RPS_02	3.05	3.34	7.31	9.69	1.2	3805.050781	7583.5025	62.7447	1.0203	5.4341	14.8259	0.8675	0	0	0	0.2481	14.8595	0	0	0	0	0	0	0	0	0	0	0	0	0	0	0	0	0	0	0	0	0	0	0	0	0	0	0	0	0	0	0	0
RPS_02	2.55	3.66	5.11	8.97	2.06	3790.11377	7580.095	73.4041	1.018	6.1098	8.3508	0.8434	0	0	0	0.8549	9.0048	0	0.4141	0	0	0	0	0	0	0	0	0	0	0	0	0	0	0	0	0	0	0	0	0	0	0	0	0	0	0	0	0	0
RPS_02	4.49	7.65	15.87	28.07	2.9	3778.222168	7569.1475	73.4878	0	7.0139	8.6028	0.9262	0.1136	0	0	0.8061	8.6829	0	0.3667	0	0	0	0	0	0	0	0	0	0	0	0	0	0	0	0	0	0	0	0	0	0	0	0	0	0	0	0	0	0
RPS_02	3.99	5	12.5	13.75	1.57	3853.632324	7566.61	64.1847	0.6405	6.1386	13.0837	0.9179	0	0.1334	0	0.8543	13.4814	0.1531	0.4123	0	0	0	0	0	0	0	0	0	0	0	0	0	0	0	0	0	0	0	0	0	0	0	0	0	0	0	0	0	0
RPS_02	2.45	2.78	4.71	8.1	1.29	3834.489746	7559.795	76.7003	0.5935	6.3778	7.4388	0.5686	0	0	0	0.2312	8.0898	0	0	0	0	0	0	0	0	0	0	0	0	0	0	0	0	0	0	0	0	0	0	0	0	0	0	0	0	0	0	0	0
RPS_02	3.9	4.81	11.93	12.3	1.52	3852.907227	7554.43	73.9972	2.0581	16.1196	0	0.2119	0.4921	0.9112	0	0	0.1671	0	5.8265	0	0	0	0	0.2163	0	0	0	0	0	0	0	0	0	0	0	0	0	0	0	0	0	0	0	0	0	0	0	0	0
RPS_02	3.13	3.55	7.68	10.56	1.29	3739.937012	7546.31	69.9839	0.5921	5.0459	10.9677	0.8916	0	0	0	0.5102	11.8401	0	0.1685	0	0	0	0	0	0	0	0	0	0	0	0	0	0	0	0	0	0	0	0	0	0	0	0	0	0	0	0	0	0
RPS_02	2.38	3.16	4.46	8.97	1.76	3732.686035	7539.785	79.6204	0.696	5.5017	6.2794	0.4804	0	0	0	0.693	6.4909	0	0.2381	0	0	0	0	0	0	0	0	0	0	0	0	0	0	0	0	0	0	0	0	0	0	0	0	0	0	0	0	0	0
RPS_02	1.77	2.07	2.47	5.64	1.36	3727.320313	7535.87	79.1156	0.8707	4.1163	7.2617	0.5173	0	0	0	0.1513	7.9671	0	0	0	0	0	0	0	0	0	0	0	0	0	0	0	0	0	0	0	0	0	0	0	0	0	0	0	0	0	0	0	0
RPS_02	3.48	3.95	9.5	12.59	1.29	3771.26123	7534.42	62.8793	1.4403	20.4463	0.1515	0	4.0267	7.5737	0	0	0	1.5564	0	0	0	0	0	1.9257	0	0	0	0	0	0	0	0	0	0	0	0	0	0	0	0	0	0	0	0	0	0	0	0	0
RPS_02	1.57	2.67	1.95	6.95	2.87	3786.77832	7527.46	90.0333	0.9247	5.5742	0.5334	1.2371	0	0	0	0.5389	1.1584	0	0	0	0	0	0	0	0	0	0	0	0	0	0	0	0	0	0	0	0	0	0	0	0	0	0	0	0	0	0	0	0
RPS_02	4.92	6.56	18.99	23.58	1.78	3787.213379	7524.705	68.2179	0	6.2109	11.0966	1.0967	0	0	0	0.5547	12.8232	0	0	0	0	0	0	0	0	0	0	0	0	0	0	0	0	0	0	0	0	0	0	0	0	0	0	0	0	0	0	0	0
RPS_02	2.63	4.6	5.42	14.47	3.06	3832.749512	7522.675	73.1235	1.101	4.9743	9.4419	0.8077	0	0.1264	0	0.7817	9.2098	0.1734	0.2603	0	0	0	0	0	0	0	0	0	0	0	0	0	0	0	0	0	0	0	0	0	0	0	0	0	0	0	0	0	0
RPS_02	3.11	3.25	7.6	9.69	1.09	3824.483398	7518.905	64.4252	0	4.7109	14.5992	0.7734	0	0	0	0.3984	15.0928	0	0	0	0	0	0	0	0	0	0	0	0	0	0	0	0	0	0	0	0	0	0	0	0	0	0	0	0	0	0	0	0
RPS_02	3.07	3.9	7.39	11.29	1.61	3733.266113	7518.325	75.4307	0.6425	5.0233	8.8245	0.3851	0	0	0	0.5573	8.9058	0	0.2308	0	0	0	0	0	0	0	0	0	0	0	0	0	0	0	0	0	0	0	0	0	0	0	0	0	0	0	0	0	0
RPS_02	4.78	5.19	17.94	16.2	1.18	3821.437988	7725.98	59.4201	0	10.3611	12.1025	2.1635	0	0	0	1.9579	13.0344	0.2866	0.6739	0	0	0	0	0	0	0	0	0	0	0	0	0	0	0	0	0	0	0	0	0	0	0	0	0	0	0	0	0	0
RPS_02	6.32	8.11	31.4	22.72	1.65	3797.219727	7719.6725	48.894	1.3221	26.2011	3.4541	0.8239	5.3159	7.4642	0	0.7087	3.5205	0.2742	0.8631	0	0	0	0	0.8939	0.2644	0	0	0	0	0	0	0	0	0	0	0	0	0	0	0	0	0	0	0	0	0	0	0	0
RPS_02	5.78	6.82	26.23	19.82	1.39	3840.145508	7710.2475	48.3329	1.9535	33.216	0.1799	0.2959	5.4143	9.2392	0	0.1352	0	0.275	0	0	0	0	0	0.9581	0	0	0	0	0	0	0	0	0	0	0	0	0	0	0	0	0	0	0	0	0	0	0	0	0
RPS_02	5.54	7.32	24.1	28.36	1.75	3809.111328	7694.37	53.4526	0	6.8958	17.4138	1.5186	0	0	0	1.2242	18.5663	0.3407	0.588	0	0	0	0	0	0	0	0	0	0	0	0	0	0	0	0	0	0	0	0	0	0	0	0	0	0	0	0	0	0
RPS_02	5.77	7.32	26.15	23.73	1.61	3734.28125	7685.96	50.8197	1.297	23.1988	5.7165	0.817	5.7918	6.0277	0	0.3076	5.7005	0	0	0	0	0	0	0.3235	0	0	0	0	0	0	0	0	0	0	0	0	0	0	0	0	0	0	0	0	0	0	0	0	0
RPS_02	2.23	2.81	3.91	9.4	1.58	3861.898438	7663.485	75.7393	0.5474	8.7363	6.0695	0.9282	0	0	0	1.2393	6.1003	0	0.6397	0	0	0	0	0	0	0	0	0	0	0	0	0	0	0	0	0	0	0	0	0	0	0	0	0	0	0	0	0	0
RPS_02	2.61	2.84	5.36	8.39	1.18	3810.416504	7660.585	70.971	0.6165	4.1013	11.4941	0.4699	0	0	0	0.2672	11.9154	0	0.1647	0	0	0	0	0	0	0	0	0	0	0	0	0	0	0	0	0	0	0	0	0	0	0	0	0	0	0	0	0	0
RPS_02	1.54	1.75	1.86	4.92	1.29	3750.958496	7658.9175	91.4896	0.9114	3.4304	1.892	0.1739	0	0	0	0	2.1027	0	0	0	0	0	0	0	0	0	0	0	0	0	0	0	0	0	0	0	0	0	0	0	0	0	0	0	0	0	0	0	0
RPS_02	2.21	2.61	3.85	6.95	1.39	3870.45459	7657.25	86.3123	1.1961	3.5762	4.1818	0.2655	0	0	0	0	4.468	0	0	0	0	0	0	0	0	0	0	0	0	0	0	0	0	0	0	0	0	0	0	0	0	0	0	0	0	0	0	0	0
RPS_02	1.4	1.65	1.55	4.63	1.38	3864.36377	7651.6675	90.1903	0.8682	4.3802	2.1725	0.2313	0	0	0	0	2.1575	0	0	0	0	0	0	0	0	0	0	0	0	0	0	0	0	0	0	0	0	0	0	0	0	0	0	0	0	0	0	0	0
RPS_02	4.33	5.76	14.7	18.09	1.77	3755.164063	7642.895	63.4294	0.6421	3.9451	14.4485	0.4764	0	0	0	0.5983	15.9042	0	0.2953	0	0	0	0	0	0.2607	0	0	0	0	0	0	0	0	0	0	0	0	0	0	0	0	0	0	0	0	0	0	0	0
RPS_02	4.52	5.09	16.01	17.51	1.27	3812.156738	7641.445	58.444	0	7.9451	12.9913	1.7499	0	0.1136	0	2.0207	14.6111	0.3101	0.9672	0	0	0.244	0	0.2763	0.3266	0	0	0	0	0	0	0	0	0	0	0	0	0	0	0	0	0	0	0	0	0	0	0	0
RPS_02	3.91	4.74	12.02	16.06	1.47	3801.280273	7631.44	54.6397	1.5083	27.6215	0	0	8.1374	7.4087	0	0	0	0	0	0	0	0.1884	0	0.271	0.2249	0	0	0	0	0	0	0	0	0	0	0	0	0	0	0	0	0	0	0	0	0	0	0	0
RPS_02	1.89	2.11	2.81	6.08	1.24	3731.23584	7630.28	82.6878	1.0729	4.697	5.1072	0.5801	0	0	0	0.2548	5.6002	0	0	0	0	0	0	0	0	0	0	0	0	0	0	0	0	0	0	0	0	0	0	0	0	0	0	0	0	0	0	0	0
RPS_02	3.66	4.47	10.53	12.59	1.49	3789.533691	7628.105	74.946	0	7.316	7.4756	0.6331	0	0	0	1.1928	7.6757	0.1529	0.608	0	0	0	0	0	0	0	0	0	0	0	0	0	0	0	0	0	0	0	0	0	0	0	0	0	0	0	0	0	0
RPS_02	2.68	3.76	5.65	11.72	1.97	3807.661133	7626.8	82.8538	1.2057	6.2298	3.9964	0.9289	0	0	0	0.2823	4.5031	0	0	0	0	0	0	0	0	0	0	0	0	0	0	0	0	0	0	0	0	0	0	0	0	0	0	0	0	0	0	0	0
RPS_02	3.28	4.85	8.44	21.27	2.19	3848.84668	7844.025	81.0691	0.7223	6.449	3.9159	0.7896	0	0	0	1.7666	4.2356	0.1732	0.8788	0	0	0	0	0	0	0	0	0	0	0	0	0	0	0	0	0	0	0	0	0	0	0	0	0	0	0	0	0	0
RPS_02	1.79	2.11	2.51	6.08	1.39	3743.41748	7841.125	88.7402	0.9963	3.1865	3.4158	0.1301	0	0	0	0	3.5312	0	0	0	0	0	0	0	0	0	0	0	0	0	0	0	0	0	0	0	0	0	0	0	0	0	0	0	0	0	0	0	0
RPS_02	2.66	4.39	5.55	9.69	2.73	3851.74707	7839.53	87.0027	0.875	4.5474	3.7934	0.1729	0	0	0	0.1586	3.45	0	0	0	0	0	0	0	0	0	0	0	0	0	0	0	0	0	0	0	0	0	0	0	0	0	0	0	0	0	0	0	0
RPS_02	3.01	5.32	7.1	16.93	3.14	3749.073242	7838.4425	90.5495	1.1955	3.0613	2.5314	0	0	0	0	0	2.6623	0	0	0	0	0	0	0	0	0	0	0	0	0	0	0	0	0	0	0	0	0	0	0	0	0	0	0	0	0	0	0	0
RPS_02	2.32	3.26	4.23	9.26	1.98	3848.556641	7838.515	85.5187	0.6658	3.8694	4.9046	0.1549	0	0	0	0.185	4.7017	0	0	0	0	0	0	0	0	0	0	0	0	0	0	0	0	0	0	0	0	0	0	0	0	0	0	0	0	0	0	0	0
RPS_02	2.4	2.89	4.52	9.69	1.45	3743.63501	7838.37	68.2832	0.5262	8.3009	9.3217	0.8022	0	0	0	3.0497	8.4314	0.178	1.1068	0	0	0	0	0	0	0	0	0	0	0	0	0	0	0	0	0	0	0	0	0	0	0	0	0	0	0	0	0	0
RPS_02	4.8	5.48	18.07	15.92	1.3	3781.847656	7834.745	57.0456	0	5.5296	16.5574	0.5879	0	0	0	1.8203	17.4062	0.2799	0.7731	0	0	0	0	0	0	0	0	0	0	0	0	0	0	0	0	0	0	0	0	0	0	0	0	0	0	0	0	0	0
RPS_02	6.63	7.78	34.52	23.58	1.38	3809.836426	7817.9975	48.1997	1.5926	27.1074	1.0687	0.3917	1.0068	18.5356	0	0.1742	0.9627	0.2408	0.1996	0	0	0	0	0.5202	0	0	0	0	0	0	0	0	0	0	0	0	0	0	0	0	0	0	0	0	0	0	0	0	0
RPS_02	2.66	3.07	5.57	8.1	1.33	3801.425293	7775.44	70.4748	0	3.9851	12.0692	0.5218	0	0	0	0.1987	12.7503	0	0	0	0	0	0	0	0	0	0	0	0	0	0	0	0	0	0	0	0	0	0	0	0	0	0	0	0	0	0	0	0
RPS_02	3.23	4.12	8.21	10.71	1.62	3808.67627	7766.74	72.0762	1.5469	17.5589	0	0.2796	3.1163	4.6101	0	0	0	0.2047	0	0	0	0	0	0.6072	0	0	0	0	0	0	0	0	0	0	0	0	0	0	0	0	0	0	0	0	0	0	0	0	0
RPS_02	3.83	4.69	11.49	15.05	1.5	3741.387207	7759.055	70.549	0.5692	6.8009	9.6342	1.1895	0	0	0	1.2965	9.5775	0	0.3832	0	0	0	0	0	0	0	0	0	0	0	0	0	0	0	0	0	0	0	0	0	0	0	0	0	0	0	0	0	0
RPS_02	5.5	7.27	23.74	18.23	1.75	3797.944824	7747.2375	51.6695	1.8827	27.3725	0	0.4371	6.96	9.3945	0	0	0	1.3802	0	0	0	0	0	0.9035	0	0	0	0	0	0	0	0	0	0	0	0	0	0	0	0	0	0	0	0	0	0	0	0	0
RPS_02	2.93	3.5	6.74	9.4	1.43	3824.193359	7746.44	68.1375	0.7323	3.8221	13.1246	0.4598	0	0	0	0.3246	13.3992	0	0	0	0	0	0	0	0	0	0	0	0	0	0	0	0	0	0	0	0	0	0	0	0	0	0	0	0	0	0	0	0
RPS_02	6.64	8.04	34.6	30.96	1.47	3761.544922	7743.0325	45.1479	0.9888	20.3518	10.5409	1.3412	3.57	5.2091	0	0.4653	11.9632	0	0	0	0	0	0	0.4219	0	0	0	0	0	0	0	0	0	0	0	0	0	0	0	0	0	0	0	0	0	0	0	0	0
RPS_02	3.1	3.75	7.56	10.42	1.46	3862.043457	7740.205	77.1118	0.6822	2.4744	9.5108	0.2092	0	0	0	0	10.0118	0	0	0	0	0	0	0	0	0	0	0	0	0	0	0	0	0	0	0	0	0	0	0	0	0	0	0	0	0	0	0	0
RPS_02	1.97	2.4	3.06	6.51	1.47	3997.281738	7847.36	81.5838	0.9033	3.8183	6.5053	0.2781	0	0	0	0.1826	6.7287	0	0	0	0	0	0	0	0	0	0	0	0	0	0	0	0	0	0	0	0	0	0	0	0	0	0	0	0	0	0	0	0
RPS_02	3.05	3.48	7.33	10.13	1.3	3951.600586	7844.895	64.9665	1.7115	20.2253	0	0.1596	4.1387	6.0624	0.7148	0	0	0	0	0.1998	0	0	0.2295	1.3565	0.2355	0	0	0	0	0	0	0	0	0	0	0	0	0	0	0	0	0	0	0	0	0	0	0	0
RPS_02	2.04	2.43	3.27	6.66	1.41	4005.547852	7840.835	89.1834	1.2186	3.3627	3.0647	0.1117	0	0	0	0	3.0589	0	0	0	0	0	0	0	0	0	0	0	0	0	0	0	0	0	0	0	0	0	0	0	0	0	0	0	0	0	0	0	0
RPS_02	4	5.9	12.58	15.77	2.18	3877.278076	7838.4425	66.989	1.2699	18.922	0.1171	3.0636	0.8249	7.3036	0	0	0	0.6692	0	0	0	0	0	0.8407	0	0	0	0	0	0	0	0	0	0	0	0	0	0	0	0	0	0	0	0	0	0	0	0	0
RPS_02	2.89	3.25	6.57	10.56	1.26	3921.726563	7813.575	77.5795	0.7156	4.7742	7.9643	0.2839	0	0	0	0.5651	8.1173	0	0	0	0	0	0	0	0	0	0	0	0	0	0	0	0	0	0	0	0	0	0	0	0	0	0	0	0	0	0	0	0
RPS_02	3.85	4.73	11.64	14.03	1.51	3963.782227	7811.545	67.9867	1.1984	14.3391	2.7727	0.5586	0.2659	1.0247	0	1.7201	3.9484	0	6.1853	0	0	0	0	0	0	0	0	0	0	0	0	0	0	0	0	0	0	0	0	0	0	0	0	0	0	0	0	0	0
RPS_02	2.24	2.59	3.96	7.23	1.33	3959.866699	7811.98	65.6357	0.6996	5.8098	12.6524	0.6422	0	0.1868	0	0	13.5851	0	0.7885	0	0	0	0	0	0	0	0	0	0	0	0	0	0	0	0	0	0	0	0	0	0	0	0	0	0	0	0	0	0
RPS_02	1.95	3.07	2.99	9.4	2.47	3915.055664	7806.035	89.4014	1.0327	3.9876	2.5102	0.2226	0	0	0	0.3218	2.5238	0	0	0	0	0	0	0	0	0	0	0	0	0	0	0	0	0	0	0	0	0	0	0	0	0	0	0	0	0	0	0	0
RPS_02	1.62	2.09	2.07	5.35	1.65	3899.973633	7801.3225	87.5266	0.7853	3.3318	3.8366	0.171	0	0	0	0.2543	4.0944	0	0	0	0	0	0	0	0	0	0	0	0	0	0	0	0	0	0	0	0	0	0	0	0	0	0	0	0	0	0	0	0
RPS_02	1.59	1.9	1.99	5.06	1.43	3913.895508	7797.9875	93.0979	0.8824	3.3848	1.3115	0	0	0	0	0	1.3235	0	0	0	0	0	0	0	0	0	0	0	0	0	0	0	0	0	0	0	0	0	0	0	0	0	0	0	0	0	0	0	0
RPS_02	1.71	2.21	2.3	5.35	1.66	3992.351074	7792.3325	84.2188	0.7407	4.6516	4.6743	0.5713	0	0	0	0.2111	4.9322	0	0	0	0	0	0	0	0	0	0	0	0	0	0	0	0	0	0	0	0	0	0	0	0	0	0	0	0	0	0	0	0
RPS_02	4.89	6.36	18.8	20.11	1.69	3973.933594	7785.155	57.3873	0.8399	14.8961	8.7626	1.532	1.2445	2.3014	0	1.5719	9.1956	0.3348	1.5624	0	0	0	0	0.3716	0	0	0	0	0	0	0	0	0	0	0	0	0	0	0	0	0	0	0	0	0	0	0	0	0
RPS_02	3.01	3.95	7.1	11.43	1.73	3989.160645	7783.56	78.0486	0.7933	7.0159	5.6642	0.554	0	0.1439	0	0.4619	6.5355	0	0.7827	0	0	0	0	0	0	0	0	0	0	0	0	0	0	0	0	0	0	0	0	0	0	0	0	0	0	0	0	0	0
RPS_02	3.68	4.62	10.63	12.59	1.58	3960.446777	7781.24	58.5367	2.0939	24.5953	0.1023	0.491	3.0102	8.9695	0	0	0.3016	0.2405	0.8119	0	0	0	0	0.8473	0	0	0	0	0	0	0	0	0	0	0	0	0	0	0	0	0	0	0	0	0	0	0	0	0
RPS_02	2.22	2.88	3.87	7.38	1.69	3981.909668	7774.715	92.6437	1.2483	3.2625	1.4357	0	0	0	0	0	1.4098	0	0	0	0	0	0	0	0	0	0	0	0	0	0	0	0	0	0	0	0	0	0	0	0	0	0	0	0	0	0	0	0
RPS_02	3.16	4.6	7.83	11.86	2.12	4003.807617	7757.17	74.2863	0.924	5.0602	9.253	0.6086	0	0	0	0.3484	9.5195	0	0	0	0	0	0	0	0	0	0	0	0	0	0	0	0	0	0	0	0	0	0	0	0	0	0	0	0	0	0	0	0
RPS_02	1.88	2.19	2.78	6.08	1.35	4088.144043	7833.73	87.9034	0.972	3.2957	3.745	0.1143	0	0	0	0	3.9696	0	0	0	0	0	0	0	0	0	0	0	0	0	0	0	0	0	0	0	0	0	0	0	0	0	0	0	0	0	0	0	0
RPS_02	2.18	2.78	3.73	7.09	1.63	4039.272461	7832.135	76.498	0.7014	5.477	7.8605	0.7629	0	0	0	0.3326	8.3676	0	0	0	0	0	0	0	0	0	0	0	0	0	0	0	0	0	0	0	0	0	0	0	0	0	0	0	0	0	0	0	0
RPS_02	3.68	4.17	10.66	11.43	1.28	4107.286621	7828.075	72.7043	1.1882	7.7166	7.4099	0.9976	0	0	0	1.465	7.8381	0.1647	0.5156	0	0	0	0	0	0	0	0	0	0	0	0	0	0	0	0	0	0	0	0	0	0	0	0	0	0	0	0	0	0
RPS_02	1.94	2.66	2.95	6.66	1.88	4077.557617	7827.205	80.7068	0.6856	5.4217	6.119	0.3669	0	0	0	0.2797	6.4203	0	0	0	0	0	0	0	0	0	0	0	0	0	0	0	0	0	0	0	0	0	0	0	0	0	0	0	0	0	0	0	0
RPS_02	3.17	4.54	7.87	12.01	2.06	4057.472412	7818.07	77.9772	0.7424	5.3497	7.241	0.6561	0	0	0	0.3674	7.6663	0	0	0	0	0	0	0	0	0	0	0	0	0	0	0	0	0	0	0	0	0	0	0	0	0	0	0	0	0	0	0	0
RPS_02	3.51	3.94	9.69	11.72	1.26	4042.172852	7791.535	63.6362	0.5964	3.6407	15.4434	0.2784	0	0	0	0.3746	15.3401	0.2413	0.1898	0	0	0	0	0.2591	0	0	0	0	0	0	0	0	0	0	0	0	0	0	0	0	0	0	0	0	0	0	0	0	0
RPS_02	2.67	3.63	5.61	9.55	1.84	4056.819824	7786.17	81.685	0.9642	5.5047	4.9848	0.4272	0	0	0	0.7628	5.3848	0	0.2865	0	0	0	0	0	0	0	0	0	0	0	0	0	0	0	0	0	0	0	0	0	0	0	0	0	0	0	0	0	0
RPS_02	3.44	4.6	9.29	13.89	1.79	4140.278564	7775.8025	69.6385	0	5.6439	11.6118	0.7137	0	0	0	0.5717	11.5525	0	0.2679	0	0	0	0	0	0	0	0	0	0	0	0	0	0	0	0	0	0	0	0	0	0	0	0	0	0	0	0	0	0
RPS_02	2.12	2.53	3.52	6.95	1.43	4072.481934	7769.205	83.6421	1.0344	4.5158	5.1371	0.3389	0	0	0	0.1747	5.1571	0	0	0	0	0	0	0	0	0	0	0	0	0	0	0	0	0	0	0	0	0	0	0	0	0	0	0	0	0	0	0	0
RPS_02	2.97	3.77	6.91	10.56	1.62	4166.5271	7768.335	83.1938	1.1028	3.8969	5.5788	0.2511	0	0	0	0.1855	5.7911	0	0	0	0	0	0	0	0	0	0	0	0	0	0	0	0	0	0	0	0	0	0	0	0	0	0	0	0	0	0	0	0
RPS_02	1.8	1.97	2.55	5.79	1.19	4145.861816	7763.115	92.7473	1.0519	3.4423	1.3302	0	0	0	0	0	1.4283	0	0	0	0	0	0	0	0	0	0	0	0	0	0	0	0	0	0	0	0	0	0	0	0	0	0	0	0	0	0	0	0
RPS_02	3.77	4.57	11.18	13.31	1.47	4062.475586	7759.055	65.7528	0	4.7318	13.2231	0.9976	0	0	0	0.8071	13.9206	0.1966	0.3703	0	0	0	0	0	0	0	0	0	0	0	0	0	0	0	0	0	0	0	0	0	0	0	0	0	0	0	0	0	0
RPS_02	1.32	1.49	1.36	4.05	1.28	4057.97998	7757.0975	84.9876	0.8572	4.3452	4.4267	0.2987	0	0	0	0.3831	4.7015	0	0	0	0	0	0	0	0	0	0	0	0	0	0	0	0	0	0	0	0	0	0	0	0	0	0	0	0	0	0	0	0
RPS_02	2.62	2.98	5.4	8.97	1.29	4075.092285	7751.95	84.9852	1.0192	4.3283	4.6812	0.1542	0	0	0	0.2362	4.5957	0	0	0	0	0	0	0	0	0	0	0	0	0	0	0	0	0	0	0	0	0	0	0	0	0	0	0	0	0	0	0	0
RPS_02	1.99	2.33	3.12	6.22	1.37	4027.09082	7741.365	86.4136	1.2629	8.6313	0	0	1.5164	1.9293	0	0	0	0	0	0	0	0	0	0.2465	0	0	0	0	0	0	0	0	0	0	0	0	0	0	0	0	0	0	0	0	0	0	0	0	0
RPS_02	1.62	2.14	2.05	5.64	1.75	4055.224609	7738.755	92.2217	1.2044	3.5712	1.5259	0	0	0	0	0	1.4769	0	0	0	0	0	0	0	0	0	0	0	0	0	0	0	0	0	0	0	0	0	0	0	0	0	0	0	0	0	0	0	0
RPS_02	2.26	2.91	4	9.12	1.66	4190.317871	7850.115	76.7263	0.5122	6.2258	6.3438	1.3737	0	0	0	1.2003	6.944	0.1625	0.5112	0	0	0	0	0	0	0	0	0	0	0	0	0	0	0	0	0	0	0	0	0	0	0	0	0	0	0	0	0	0
RPS_02	2.08	2.61	3.41	6.95	1.57	4215.40625	7849.245	87.7558	0.9588	4.115	3.2465	0.2407	0	0	0	0.3037	3.3796	0	0	0	0	0	0	0	0	0	0	0	0	0	0	0	0	0	0	0	0	0	0	0	0	0	0	0	0	0	0	0	0
RPS_02	4.4	6.5	15.22	15.19	2.18	4277.909668	7845.475	59.1237	1.7186	23.4846	0	0.3415	2.3757	3.3623	0	0	0.1728	0	8.9063	0	0	0	0	0.5146	0	0	0	0	0	0	0	0	0	0	0	0	0	0	0	0	0	0	0	0	0	0	0	0	0
RPS_02	5.05	5.71	19.99	16.93	1.28	4299.807617	7843.735	63.7733	0	4.5277	14.7963	0.5283	0	0.121	0	0.8342	14.9494	0	0.4699	0	0	0	0	0	0	0	0	0	0	0	0	0	0	0	0	0	0	0	0	0	0	0	0	0	0	0	0	0	0
RPS_02	2.38	2.98	4.44	7.38	1.57	4216.421387	7840.545	78.4422	0.5786	5.746	5.8715	0.6379	0	0	0	1.2378	6.738	0	0.748	0	0	0	0	0	0	0	0	0	0	0	0	0	0	0	0	0	0	0	0	0	0	0	0	0	0	0	0	0	0
RPS_02	6.86	8.6	36.95	26.19	1.57	4234.983887	7828.1475	50.4837	1.6935	26.0699	0.6056	1.2203	3.529	7.4051	0	0.3618	2.5325	0.6971	4.2737	0	0	0	0	1.1278	0	0	0	0	0	0	0	0	0	0	0	0	0	0	0	0	0	0	0	0	0	0	0	0	0
RPS_02	1.77	2.05	2.45	5.79	1.34	4206.995117	7826.4075	84.3184	0.7468	4.5696	4.6935	0.517	0	0	0	0.291	4.8636	0	0	0	0	0	0	0	0	0	0	0	0	0	0	0	0	0	0	0	0	0	0	0	0	0	0	0	0	0	0	0	0
RPS_02	2.43	3.11	4.65	8.54	1.63	4304.593262	7820.39	81.7768	0.8638	4.1781	6.33	0.2878	0	0	0	0.1635	6.4001	0	0	0	0	0	0	0	0	0	0	0	0	0	0	0	0	0	0	0	0	0	0	0	0	0	0	0	0	0	0	0	0
RPS_02	6.49	9.84	33.03	28.94	2.3	4267.685791	7806.5425	48.1488	2.2319	32.1808	0.6912	0.242	6.4989	7.8784	0	0	0	0.2745	0	0	0	0	0	1.8535	0	0	0	0	0	0	0	0	0	0	0	0	0	0	0	0	0	0	0	0	0	0	0	0	0
RPS_02	5.73	6.67	25.79	24.6	1.35	4310.684082	7781.0225	58.5687	0	6.0875	15.7521	0.8132	0	0	0	1.8272	16.0935	0.1792	0.6786	0	0	0	0	0	0	0	0	0	0	0	0	0	0	0	0	0	0	0	0	0	0	0	0	0	0	0	0	0	0
RPS_02	1.94	2.66	2.95	6.51	1.88	4311.40918	7776.745	84.8333	0.7512	2.9729	5.4455	0.2433	0	0	0	0	5.7538	0	0	0	0	0	0	0	0	0	0	0	0	0	0	0	0	0	0	0	0	0	0	0	0	0	0	0	0	0	0	0	0
RPS_02	1.38	1.74	1.49	4.63	1.6	4315.179688	7776.5275	92.6701	0.8145	4.0647	1.2518	0.1513	0	0	0	0	1.0477	0	0	0	0	0	0	0	0	0	0	0	0	0	0	0	0	0	0	0	0	0	0	0	0	0	0	0	0	0	0	0	0
RPS_02	1.25	2.07	1.24	5.06	2.73	4282.550293	7770.2925	87.7301	0.5233	5.6749	0.8383	0.6645	0.1157	0	0	2.2898	0.5398	0.2117	1.4121	0	0	0	0	0	0	0	0	0	0	0	0	0	0	0	0	0	0	0	0	0	0	0	0	0	0	0	0	0	0
RPS_02	4.64	5.69	16.87	18.52	1.51	4174.945801	7762.6075	68.1688	0.7206	4.4409	11.8101	0.5496	0	0	0	0.9377	12.4069	0.2022	0.5295	0	0	0	0	0	0.2337	0	0	0	0	0	0	0	0	0	0	0	0	0	0	0	0	0	0	0	0	0	0	0	0
RPS_02	2.37	3.16	4.4	7.38	1.78	4282.695313	7764.42	74.2108	0.5917	4.938	9.5863	0.4061	0	0	0	0.2064	10.0608	0	0	0	0	0	0	0	0	0	0	0	0	0	0	0	0	0	0	0	0	0	0	0	0	0	0	0	0	0	0	0	0
RPS_02	3.06	3.52	7.35	10.42	1.33	4248.180664	7760.505	67.2689	1.4157	17.1649	0	0	3.1474	8.1896	0	0	0	2.5987	0	0	0	0	0	0.2148	0	0	0	0	0	0	0	0	0	0	0	0	0	0	0	0	0	0	0	0	0	0	0	0	0
RPS_02	4.7	5.9	17.33	19.24	1.58	4265.583008	7754.6325	61.8905	0.7703	13.7217	7.1595	1.1716	2.1395	3.6501	0	0.7561	7.0862	0.35	0.3259	0	0	0	0	0.7588	0.2198	0	0	0	0	0	0	0	0	0	0	0	0	0	0	0	0	0	0	0	0	0	0	0	0
RPS_02	2.86	4.63	6.41	16.78	2.63	4190.172852	7755.285	69.4668	0	4.6747	11.7935	0.6697	0	0	0	0.795	12.268	0	0.3324	0	0	0	0	0	0	0	0	0	0	0	0	0	0	0	0	0	0	0	0	0	0	0	0	0	0	0	0	0	0
RPS_02	3.68	4.35	10.63	13.31	1.4	4203.949707	7752.24	78.9223	0.9554	4.0711	7.6772	0.269	0	0	0	0.3562	7.7488	0	0	0	0	0	0	0	0	0	0	0	0	0	0	0	0	0	0	0	0	0	0	0	0	0	0	0	0	0	0	0	0
RPS_02	2.41	2.75	4.54	8.1	1.3	4177.266113	7749.775	82.7195	0.8207	3.9096	5.9804	0.1885	0	0	0	0.2767	6.1046	0	0	0	0	0	0	0	0	0	0	0	0	0	0	0	0	0	0	0	0	0	0	0	0	0	0	0	0	0	0	0	0
RPS_02	1.25	1.54	1.24	4.05	1.5	4254.271484	7747.9625	88.4818	0.6031	4.1642	2.6194	0.1682	0	0	0	0.8243	2.6018	0	0.5372	0	0	0	0	0	0	0	0	0	0	0	0	0	0	0	0	0	0	0	0	0	0	0	0	0	0	0	0	0	0
RPS_02	1.57	2.59	1.93	6.22	2.73	4252.241211	7743.105	90.7455	0.5258	2.9705	2.6438	0	0	0	0	0.1725	2.942	0	0	0	0	0	0	0	0	0	0	0	0	0	0	0	0	0	0	0	0	0	0	0	0	0	0	0	0	0	0	0	0
RPS_02	2.71	2.95	5.78	8.54	1.18	4183.356934	7742.67	81.5324	1.5173	10.5711	0	0.2471	0.4147	0.9198	0	0	0	0	4.7976	0	0	0	0	0	0	0	0	0	0	0	0	0	0	0	0	0	0	0	0	0	0	0	0	0	0	0	0	0	0
RPS_02	3.67	4.74	10.55	12.88	1.67	4267.613281	7739.915	74.7116	0.7723	4.5506	9.6234	0.3474	0	0	0	0	9.9947	0	0	0	0	0	0	0	0	0	0	0	0	0	0	0	0	0	0	0	0	0	0	0	0	0	0	0	0	0	0	0	0
RPS_02	2.02	2.46	3.2	6.8	1.48	4226.717773	7739.77	85.5306	0.8324	2.9989	5.1717	0.2408	0	0	0	0	5.2256	0	0	0	0	0	0	0	0	0	0	0	0	0	0	0	0	0	0	0	0	0	0	0	0	0	0	0	0	0	0	0	0
RPS_02	2.2	2.91	3.79	7.81	1.76	4243.10498	7739.335	82.9465	0.8158	3.3551	6.1362	0.1925	0	0	0	0.2711	6.2828	0	0	0	0	0	0	0	0	0	0	0	0	0	0	0	0	0	0	0	0	0	0	0	0	0	0	0	0	0	0	0	0
RPS_02	1.62	1.95	2.05	4.92	1.45	4451.288086	7846.78	90.2507	0.8762	3.5898	2.4594	0.152	0	0	0	0.1683	2.5036	0	0	0	0	0	0	0	0	0	0	0	0	0	0	0	0	0	0	0	0	0	0	0	0	0	0	0	0	0	0	0	0
RPS_02	2.21	2.53	3.83	7.23	1.31	4391.830078	7838.95	86.0814	0.7833	4.2131	4.1191	0.1707	0	0	0	0.3238	4.3086	0	0	0	0	0	0	0	0	0	0	0	0	0	0	0	0	0	0	0	0	0	0	0	0	0	0	0	0	0	0	0	0
RPS_02	0.86	1.02	0.59	2.89	1.4	4387.116943	7837.5	91.1446	1.0293	3.3692	2.0735	0.1229	0	0	0	0	2.2605	0	0	0	0	0	0	0	0	0	0	0	0	0	0	0	0	0	0	0	0	0	0	0	0	0	0	0	0	0	0	0	0
RPS_02	1.23	1.56	1.19	4.05	1.6	4366.741699	7832.4975	92.6012	1.1022	3.3654	1.3486	0.1208	0	0	0	0.1949	1.2668	0	0	0	0	0	0	0	0	0	0	0	0	0	0	0	0	0	0	0	0	0	0	0	0	0	0	0	0	0	0	0	0
RPS_02	2.96	3.12	6.87	9.26	1.12	4363.40625	7827.93	63.6783	0	3.1112	15.7539	0.3309	0	0	0	0.4262	16.6995	0	0	0	0	0	0	0	0	0	0	0	0	0	0	0	0	0	0	0	0	0	0	0	0	0	0	0	0	0	0	0	0
RPS_02	2.18	2.89	3.73	8.1	1.76	4460.859375	7815.895	84.8864	0.6269	4.7624	4.4329	0.579	0	0	0	0.3832	4.3293	0	0	0	0	0	0	0	0	0	0	0	0	0	0	0	0	0	0	0	0	0	0	0	0	0	0	0	0	0	0	0	0
RPS_02	2.11	2.37	3.5	6.22	1.27	4450.708008	7814.735	75.4827	0.8809	5.0007	8.8675	0.4445	0	0	0	0	9.3237	0	0	0	0	0	0	0	0	0	0	0	0	0	0	0	0	0	0	0	0	0	0	0	0	0	0	0	0	0	0	0	0
RPS_02	3.84	4.92	11.6	15.34	1.64	4364.276367	7790.665	65.5818	0	2.478	14.4354	0.413	0	0.1121	0	0.4005	16.1879	0.1517	0	0	0	0	0	0	0.2396	0	0	0	0	0	0	0	0	0	0	0	0	0	0	0	0	0	0	0	0	0	0	0	0
RPS_02	5.8	8.71	26.4	28.21	2.26	4369.352051	7775.8025	67.9565	1.5055	19.7838	0	0.2104	3.7023	6.2364	0	0	0	0	0	0	0	0	0	0.6052	0	0	0	0	0	0	0	0	0	0	0	0	0	0	0	0	0	0	0	0	0	0	0	0	0
RPS_02	3.15	3.55	7.81	10.42	1.27	4381.82373	7770.075	72.7538	0.5527	5.064	10.0485	0.64	0	0	0	0.2448	10.6962	0	0	0	0	0	0	0	0	0	0	0	0	0	0	0	0	0	0	0	0	0	0	0	0	0	0	0	0	0	0	0	0
RPS_02	4.23	4.57	14.03	14.03	1.17	4507.055664	7844.315	63.359	0.6768	6.2978	13.4403	0.9006	0	0	0	1.4227	13.3227	0.1806	0.3994	0	0	0	0	0	0	0	0	0	0	0	0	0	0	0	0	0	0	0	0	0	0	0	0	0	0	0	0	0	0
RPS_02	4.26	5.08	14.26	17.22	1.42	4548.67627	7838.08	54.4952	2.0591	27.6795	0	0.1985	6.7662	7.1683	0	0	0	0.1804	0	0.3514	0	0	0	0.8888	0.2126	0	0	0	0	0	0	0	0	0	0	0	0	0	0	0	0	0	0	0	0	0	0	0	0
RPS_02	3.5	4.93	9.61	19.97	1.98	4516.916992	7832.86	80.5975	1.0958	6.1767	5.8159	0.3654	0	0	0	0.4054	5.5433	0	0	0	0	0	0	0	0	0	0	0	0	0	0	0	0	0	0	0	0	0	0	0	0	0	0	0	0	0	0	0	0
RPS_02	2.66	3.18	5.55	8.54	1.43	4514.741699	7828.8	81.0459	0.7646	3.1963	7.3412	0.1405	0	0	0	0	7.5115	0	0	0	0	0	0	0	0	0	0	0	0	0	0	0	0	0	0	0	0	0	0	0	0	0	0	0	0	0	0	0	0
RPS_02	0.83	1.23	0.54	2.89	2.17	4580.000488	7823.9425	92.4154	0.6497	3.7459	1.278	0.1391	0	0	0	0.4297	1.3421	0	0	0	0	0	0	0	0	0	0	0	0	0	0	0	0	0	0	0	0	0	0	0	0	0	0	0	0	0	0	0	0
RPS_02	1.8	2.05	2.55	5.5	1.29	4580.580566	7821.3325	91.6982	0.9706	2.9062	2.0981	0	0	0	0	0.182	2.1449	0	0	0	0	0	0	0	0	0	0	0	0	0	0	0	0	0	0	0	0	0	0	0	0	0	0	0	0	0	0	0	0
RPS_02	2.62	4.04	5.4	8.83	2.37	4581.595703	7817.78	86.7511	0.8083	3.6702	4.0255	0.1285	0	0	0	0.4011	4.2154	0	0	0	0	0	0	0	0	0	0	0	0	0	0	0	0	0	0	0	0	0	0	0	0	0	0	0	0	0	0	0	0
RPS_02	4.77	5.95	17.9	16.35	1.55	4484.577637	7815.9675	59.2545	0	5.8808	16.4005	0.9433	0.1057	0	0	0.4743	16.941	0	0	0	0	0	0	0	0	0	0	0	0	0	0	0	0	0	0	0	0	0	0	0	0	0	0	0	0	0	0	0	0
RPS_02	2.57	3.52	5.19	9.84	1.88	4533.811768	7795.0875	89.5994	1.2067	4.3596	2.26	0.1559	0	0	0	0.2464	2.172	0	0	0	0	0	0	0	0	0	0	0	0	0	0	0	0	0	0	0	0	0	0	0	0	0	0	0	0	0	0	0	0
RPS_02	0.86	1.1	0.59	3.04	1.63	4531.781494	7795.6675	90.7009	0.8453	3.1282	2.5165	0.1107	0	0	0	0.2014	2.497	0	0	0	0	0	0	0	0	0	0	0	0	0	0	0	0	0	0	0	0	0	0	0	0	0	0	0	0	0	0	0	0
RPS_02	0.94	1.24	0.69	3.33	1.74	4528.373535	7795.3775	90.6102	0.9879	3.2042	2.4879	0	0	0	0	0	2.7099	0	0	0	0	0	0	0	0	0	0	0	0	0	0	0	0	0	0	0	0	0	0	0	0	0	0	0	0	0	0	0	0
RPS_02	2.23	2.64	3.89	7.81	1.41	4572.749512	7785.3	81.7369	0.9593	6.9641	3.6544	0.8674	0	0	0	1.7105	3.451	0	0.6564	0	0	0	0	0	0	0	0	0	0	0	0	0	0	0	0	0	0	0	0	0	0	0	0	0	0	0	0	0	0
RPS_02	2.63	3.9	5.42	10.42	2.2	4575.794922	7783.27	82.0604	0.8258	3.6912	6.5689	0.1996	0	0	0	0	6.6541	0	0	0	0	0	0	0	0	0	0	0	0	0	0	0	0	0	0	0	0	0	0	0	0	0	0	0	0	0	0	0	0
RPS_02	2.56	2.81	5.15	8.54	1.2	4509.085938	7782.69	72.7839	0.8748	3.9419	10.7284	0.3953	0	0	0	0.1879	11.0878	0	0	0	0	0	0	0	0	0	0	0	0	0	0	0	0	0	0	0	0	0	0	0	0	0	0	0	0	0	0	0	0
RPS_02	3.51	4.39	9.69	12.3	1.56	4496.904297	7781.095	62.7178	0	4.9493	15.2498	0.3441	0	0	0	0.5658	15.8565	0	0.3166	0	0	0	0	0	0	0	0	0	0	0	0	0	0	0	0	0	0	0	0	0	0	0	0	0	0	0	0	0	0
RPS_02	3.77	4.65	11.16	17.22	1.52	4488.638184	7776.02	55.6687	0	5.567	17.7384	0.8182	0	0.2008	0	0.7823	18.8488	0	0.376	0	0	0	0	0	0	0	0	0	0	0	0	0	0	0	0	0	0	0	0	0	0	0	0	0	0	0	0	0	0
RPS_02	1.86	2.56	2.72	7.67	1.9	4503.285156	7775.585	81.995	0.8793	5.4641	4.9134	0.4925	0	0	0	0.8619	5.0278	0	0.3659	0	0	0	0	0	0	0	0	0	0	0	0	0	0	0	0	0	0	0	0	0	0	0	0	0	0	0	0	0	0
RPS_02	2.03	2.85	3.24	7.09	1.97	4486.027832	7774.425	47.8949	1.2793	27.8432	0.3385	0.5579	1.4303	19.502	0	0.4046	0.3298	0	0	0	0	0	0	0.4195	0	0	0	0	0	0	0	0	0	0	0	0	0	0	0	0	0	0	0	0	0	0	0	0	0
RPS_02	2.44	3.12	4.69	9.84	1.63	4480.952148	7771.67	74.3261	0	3.9858	9.845	0.3514	0	0	0	0.5601	10.3838	0.3169	0	0	0	0	0	0.2311	0	0	0	0	0	0	0	0	0	0	0	0	0	0	0	0	0	0	0	0	0	0	0	0	0
RPS_02	1.05	1.49	0.86	3.47	2.03	4579.855469	7769.5675	92.2695	0.71	3.2225	1.6279	0	0	0	0	0.2735	1.7237	0	0.173	0	0	0	0	0	0	0	0	0	0	0	0	0	0	0	0	0	0	0	0	0	0	0	0	0	0	0	0	0	0
RPS_02	2.66	3.34	5.57	8.68	1.57	4498.354492	7768.625	82.7494	0.8158	3.5318	6.0564	0.1743	0	0	0	0.3049	6.3673	0	0	0	0	0	0	0	0	0	0	0	0	0	0	0	0	0	0	0	0	0	0	0	0	0	0	0	0	0	0	0	0
RPS_02	1.92	2.21	2.91	6.22	1.32	4486.027832	7762.535	80.2273	0.5648	4.2806	7.0188	0.3356	0	0	0	0.2122	7.3607	0	0	0	0	0	0	0	0	0	0	0	0	0	0	0	0	0	0	0	0	0	0	0	0	0	0	0	0	0	0	0	0
RPS_02	5.02	6.43	19.78	19.24	1.64	4511.116211	7751.225	56.3875	1.8453	26.0261	0	8.2619	0.4127	6.3589	0	0	0	0	0	0	0	0	0	0.4205	0.2872	0	0	0	0	0	0	0	0	0	0	0	0	0	0	0	0	0	0	0	0	0	0	0	0
RPS_02	2.07	2.78	3.37	6.95	1.8	4502.342529	7722.935	81.6987	1.2231	4.2227	6.1706	0.2683	0	0	0	0.3417	6.075	0	0	0	0	0	0	0	0	0	0	0	0	0	0	0	0	0	0	0	0	0	0	0	0	0	0	0	0	0	0	0	0
RPS_02	2.99	3.44	7.01	9.69	1.32	4548.821289	7716.99	65.8985	0.7071	3.664	14.5341	0.4002	0	0	0	0.135	14.6611	0	0	0	0	0	0	0	0	0	0	0	0	0	0	0	0	0	0	0	0	0	0	0	0	0	0	0	0	0	0	0	0
RPS_02	4.01	5.03	12.6	14.47	1.58	4536.349609	7705.535	57.811	0	7.3294	15.804	0.7542	0	0	0	1.5304	15.7349	0.1518	0.8844	0	0	0	0	0	0	0	0	0	0	0	0	0	0	0	0	0	0	0	0	0	0	0	0	0	0	0	0	0	0
RPS_02	1.45	1.65	1.65	4.63	1.29	4486.60791	7706.3325	89.8633	0.9765	3.7431	2.4837	0.2021	0	0	0	0.2029	2.5283	0	0	0	0	0	0	0	0	0	0	0	0	0	0	0	0	0	0	0	0	0	0	0	0	0	0	0	0	0	0	0	0
RPS_02	2.79	3.84	6.13	9.84	1.89	4504.590332	7704.665	73.554	0.5461	5.0373	9.8225	0.6173	0	0	0	0.4831	9.9396	0	0	0	0	0	0	0	0	0	0	0	0	0	0	0	0	0	0	0	0	0	0	0	0	0	0	0	0	0	0	0	0
RPS_02	3.94	4.21	12.16	12.59	1.15	4515.321777	7703.07	63.286	0.6359	6.7922	13.5046	1.0962	0	0	0	0.6019	13.9276	0.1557	0	0	0	0	0	0	0	0	0	0	0	0	0	0	0	0	0	0	0	0	0	0	0	0	0	0	0	0	0	0	0
RPS_02	2.72	4.14	5.82	9.84	2.31	4530.331299	7702.5625	87.4645	1.389	4.7546	2.925	0.1943	0	0	0	0.3016	2.971	0	0	0	0	0	0	0	0	0	0	0	0	0	0	0	0	0	0	0	0	0	0	0	0	0	0	0	0	0	0	0	0
RPS_02	2.77	3.41	6.03	9.26	1.52	4594.357422	7696.0375	76.6729	0.8166	4.2777	8.5952	0.3315	0	0	0	0.2412	9.0649	0	0	0	0	0	0	0	0	0	0	0	0	0	0	0	0	0	0	0	0	0	0	0	0	0	0	0	0	0	0	0	0
RPS_02	2.81	3.3	6.2	9.26	1.38	4550.851563	7694.515	87.81	1.2615	4.1096	3.3877	0	0	0	0	0	3.4312	0	0	0	0	0	0	0	0	0	0	0	0	0	0	0	0	0	0	0	0	0	0	0	0	0	0	0	0	0	0	0	0
RPS_02	3.74	5.16	10.97	13.17	1.91	4604.07373	7691.035	69.2721	1.8236	19.1388	0	0.2314	3.7795	4.5727	0	0	0	0.2671	0	0	0	0	0	0.9146	0	0	0	0	0	0	0	0	0	0	0	0	0	0	0	0	0	0	0	0	0	0	0	0	0
RPS_02	2.97	3.8	6.91	10.13	1.64	4512.566406	7676.1	69.4063	0.5409	4.817	11.7992	0.6514	0	0	0	0.4514	11.8597	0.196	0.2782	0	0	0	0	0	0	0	0	0	0	0	0	0	0	0	0	0	0	0	0	0	0	0	0	0	0	0	0	0	0
RPS_02	1.76	2.76	2.43	8.39	2.47	4503.140137	7662.18	90.4465	0.9175	5.2083	1.2287	0.2593	0	0	0	0.3822	1.2007	0	0.3568	0	0	0	0	0	0	0	0	0	0	0	0	0	0	0	0	0	0	0	0	0	0	0	0	0	0	0	0	0	0
RPS_02	2.16	2.61	3.66	7.38	1.46	4500.529785	7661.89	86.2428	0.7092	2.857	4.8388	0.2311	0	0	0	0.1562	4.9648	0	0	0	0	0	0	0	0	0	0	0	0	0	0	0	0	0	0	0	0	0	0	0	0	0	0	0	0	0	0	0	0
RPS_02	1.25	1.69	1.24	4.2	1.82	4600.303223	7658.4825	88.7363	0.6691	6.7653	0.511	0.4562	0	0	0	1.8937	0	0	0.9683	0	0	0	0	0	0	0	0	0	0	0	0	0	0	0	0	0	0	0	0	0	0	0	0	0	0	0	0	0	0
RPS_02	1.74	2.33	2.39	6.22	1.79	4595.227539	7652.465	89.64	0.7689	3.0394	3.1373	0	0	0	0	0	3.4143	0	0	0	0	0	0	0	0	0	0	0	0	0	0	0	0	0	0	0	0	0	0	0	0	0	0	0	0	0	0	0	0
RPS_02	1.92	2.2	2.91	6.22	1.31	4558.102539	7595.32	88.1557	1.1921	7.5195	0	0.1721	0.6079	2.0356	0	0	0	0	0	0	0	0	0	0.317	0	0	0	0	0	0	0	0	0	0	0	0	0	0	0	0	0	0	0	0	0	0	0	0	0
RPS_02	2.17	2.79	3.68	7.38	1.66	4558.392578	7559.795	85.2019	0.8711	4.656	4.2743	0.246	0	0	0	0.4422	4.3085	0	0	0	0	0	0	0	0	0	0	0	0	0	0	0	0	0	0	0	0	0	0	0	0	0	0	0	0	0	0	0	0
RPS_02	1.98	3.19	3.08	7.67	2.59	4488.203125	7535.58	90.548	0.9447	4.5329	1.9576	0.1093	0	0	0	0	1.9075	0	0	0	0	0	0	0	0	0	0	0	0	0	0	0	0	0	0	0	0	0	0	0	0	0	0	0	0	0	0	0	0
RPS_02	3.17	3.63	7.89	10.56	1.31	4531.854004	7531.81	66.2133	0.7824	14.234	5.0257	0.7063	0.3658	4.6115	0	1.2994	5.6679	0.2455	0.8482	0	0	0	0	0	0	0	0	0	0	0	0	0	0	0	0	0	0	0	0	0	0	0	0	0	0	0	0	0	0
RPS_02	2.92	3.71	6.68	10.42	1.62	4541.715332	7527.315	85.5942	1.1798	3.1592	4.9627	0.2261	0	0	0	0	4.878	0	0	0	0	0	0	0	0	0	0	0	0	0	0	0	0	0	0	0	0	0	0	0	0	0	0	0	0	0	0	0	0
RPS_02	2.83	3.5	6.28	12.3	1.53	4547.226074	7516.875	73.8356	0.6282	4.0297	10.2949	0.3129	0	0	0	0.1865	10.7121	0	0	0	0	0	0	0	0	0	0	0	0	0	0	0	0	0	0	0	0	0	0	0	0	0	0	0	0	0	0	0	0
RPS_02	1.39	1.62	1.51	4.2	1.36	4541.425293	7516.6575	91.9909	0.8545	3.1126	1.8192	0.1058	0	0	0	0.1606	1.9564	0	0	0	0	0	0	0	0	0	0	0	0	0	0	0	0	0	0	0	0	0	0	0	0	0	0	0	0	0	0	0	0
RPS_02	7.11	10.1	39.69	35.3	2.02	4535.769531	7501.2725	44.5414	1.8342	31.1812	0.4899	0.818	5.89	13.097	0	0	0	0.737	0	0	0	0	0	1.4112	0	0	0	0	0	0	0	0	0	0	0	0	0	0	0	0	0	0	0	0	0	0	0	0	0
RPS_02	2.08	2.98	3.41	8.1	2.04	4552.446777	7502.505	83.6808	0.8145	6.6502	3.5093	0.8484	0	0	0	0.7502	3.5851	0	0.1616	0	0	0	0	0	0	0	0	0	0	0	0	0	0	0	0	0	0	0	0	0	0	0	0	0	0	0	0	0	0
RPS_02	2.57	3.12	5.19	9.69	1.47	4501.544922	7500.62	78.7755	0.8084	6.2456	5.9782	0.5028	0	0	0	0.9586	6.1731	0	0.5577	0	0	0	0	0	0	0	0	0	0	0	0	0	0	0	0	0	0	0	0	0	0	0	0	0	0	0	0	0	0
RPS_02	2.13	2.78	3.58	6.95	1.7	4494.293945	7499.75	81.0559	0.7891	3.8663	6.8089	0.1442	0	0	0	0.2452	7.0904	0	0	0	0	0	0	0	0	0	0	0	0	0	0	0	0	0	0	0	0	0	0	0	0	0	0	0	0	0	0	0	0
RPS_02	4.55	5.98	16.29	15.34	1.72	4597.98291	7480.5375	61.8749	2.0359	23.6583	0.1895	0.3094	4.509	6.2226	0	0	0	0.1801	0	0	0	0	0	1.0203	0	0	0	0	0	0	0	0	0	0	0	0	0	0	0	0	0	0	0	0	0	0	0	0	0
RPS_02	6.13	7.49	29.5	21.7	1.49	4571.589355	7479.6675	50.8022	1.9491	27.9747	0.3331	1.5623	5.0187	9.1375	0	0	0	0.5996	0	0.1908	0	0	0	2.2029	0.229	0	0	0	0	0	0	0	0	0	0	0	0	0	0	0	0	0	0	0	0	0	0	0	0
RPS_02	4.09	5.17	13.13	16.49	1.6	4488.638184	7472.2	56.3189	2.2393	26.9925	0	0.2037	0.6605	0.8805	0	0	0	0	12.7046	0	0	0	0	0	0	0	0	0	0	0	0	0	0	0	0	0	0	0	0	0	0	0	0	0	0	0	0	0	0
RPS_02	2.33	2.53	4.25	7.38	1.18	4600.738281	7469.445	80.3861	0.8462	3.4625	7.362	0.1571	0	0	0	0.1514	7.6346	0	0	0	0	0	0	0	0	0	0	0	0	0	0	0	0	0	0	0	0	0	0	0	0	0	0	0	0	0	0	0	0
RPS_02	2.15	2.39	3.64	6.95	1.23	4611.179688	7458.6425	90.7904	1.1982	3.7963	2.0836	0	0	0	0	0.1619	1.9697	0	0	0	0	0	0	0	0	0	0	0	0	0	0	0	0	0	0	0	0	0	0	0	0	0	0	0	0	0	0	0	0
RPS_02	1.62	1.93	2.05	5.35	1.43	4602.768555	7457.7	88.7525	0.9274	3.9079	2.9304	0.1711	0	0	0	0.3377	2.9732	0	0	0	0	0	0	0	0	0	0	0	0	0	0	0	0	0	0	0	0	0	0	0	0	0	0	0	0	0	0	0	0
RPS_02	3.87	4.63	11.74	14.76	1.43	4493.568848	7451.175	60.2742	1.2186	21.859	0.1164	0	0.2903	15.8109	0	0	0	0	0.1821	0	0	0	0	0	0.2486	0	0	0	0	0	0	0	0	0	0	0	0	0	0	0	0	0	0	0	0	0	0	0	0
RPS_02	1.9	2.43	2.85	5.93	1.62	4550.271484	7426.09	85.5499	0.9065	3.7941	4.5868	0.1358	0	0	0	0.3356	4.6913	0	0	0	0	0	0	0	0	0	0	0	0	0	0	0	0	0	0	0	0	0	0	0	0	0	0	0	0	0	0	0	0
RPS_02	2.37	2.84	4.4	8.1	1.44	4546.936035	7420.725	81.7155	0.7375	3.7828	6.5648	0.1884	0	0	0	0.4133	6.5977	0	0	0	0	0	0	0	0	0	0	0	0	0	0	0	0	0	0	0	0	0	0	0	0	0	0	0	0	0	0	0	0
RPS_02	2.52	2.93	5	8.54	1.34	4574.344727	7410.285	79.6129	0.762	5.1687	6.3831	0.5073	0	0	0	0.8316	6.4323	0	0.3022	0	0	0	0	0	0	0	0	0	0	0	0	0	0	0	0	0	0	0	0	0	0	0	0	0	0	0	0	0	0
RPS_02	1.85	2.67	2.7	6.51	2.07	4567.528809	7406.66	90.2373	0.9869	3.4362	2.5943	0	0	0	0	0	2.7453	0	0	0	0	0	0	0	0	0	0	0	0	0	0	0	0	0	0	0	0	0	0	0	0	0	0	0	0	0	0	0	0
RPS_02	2.45	3.07	4.73	8.1	1.56	4569.269043	7401.15	86.5829	0.9457	4.1271	3.8646	0.1387	0	0	0	0.371	3.97	0	0	0	0	0	0	0	0	0	0	0	0	0	0	0	0	0	0	0	0	0	0	0	0	0	0	0	0	0	0	0	0
RPS_02	1.66	2.21	2.16	5.5	1.78	4605.813965	7401.6575	87.4929	1.0506	5.5965	2.2709	0.5966	0	0	0	0.5619	2.4306	0	0	0	0	0	0	0	0	0	0	0	0	0	0	0	0	0	0	0	0	0	0	0	0	0	0	0	0	0	0	0	0
RPS_02	3.19	4.14	7.98	12.73	1.69	4470.510742	7399.41	69.1352	0	4.1102	12.2115	0.6653	0	0	0	0.6438	13.0144	0	0.2196	0	0	0	0	0	0	0	0	0	0	0	0	0	0	0	0	0	0	0	0	0	0	0	0	0	0	0	0	0	0
RPS_02	2.45	3.52	4.71	8.39	2.07	4572.024414	7385.91	69.2933	0	4.7475	11.3534	0.4394	0	0	0	0.767	12.5847	0.2279	0.3415	0	0	0	0	0	0.2452	0	0	0	0	0	0	0	0	0	0	0	0	0	0	0	0	0	0	0	0	0	0	0	0
RPS_02	1.53	1.79	1.84	4.92	1.37	4525.618164	7382.285	87.8254	1.0318	4.2434	3.1996	0.1279	0	0	0	0.2274	3.3444	0	0	0	0	0	0	0	0	0	0	0	0	0	0	0	0	0	0	0	0	0	0	0	0	0	0	0	0	0	0	0	0
RPS_02	1.57	1.83	1.93	4.92	1.37	4488.493164	7380.255	90.8836	0.9955	3.7142	2.0143	0.1029	0	0	0	0.209	2.0805	0	0	0	0	0	0	0	0	0	0	0	0	0	0	0	0	0	0	0	0	0	0	0	0	0	0	0	0	0	0	0	0
RPS_02	1.56	1.83	1.9	5.21	1.38	4523.442871	7379.1675	86.703	0.73	3.4307	4.2588	0.1578	0	0	0	0.4436	4.2761	0	0	0	0	0	0	0	0	0	0	0	0	0	0	0	0	0	0	0	0	0	0	0	0	0	0	0	0	0	0	0	0
RPS_02	1.33	1.69	1.38	3.91	1.63	4571.009277	7377.5725	92.3355	0.8674	3.8691	1.3408	0.1158	0	0	0	0.2593	1.2121	0	0	0	0	0	0	0	0	0	0	0	0	0	0	0	0	0	0	0	0	0	0	0	0	0	0	0	0	0	0	0	0
RPS_02	2.22	2.85	3.87	8.1	1.65	4526.198242	7371.845	88.8092	0.9774	4.4988	2.6431	0.2185	0	0.123	0	0.1629	2.5671	0	0	0	0	0	0	0	0	0	0	0	0	0	0	0	0	0	0	0	0	0	0	0	0	0	0	0	0	0	0	0	0
RPS_02	2.18	2.91	3.75	7.38	1.78	4481.967285	7368.22	78.6524	0.6897	3.6393	7.9533	0.5976	0	0	0	0.3257	8.142	0	0	0	0	0	0	0	0	0	0	0	0	0	0	0	0	0	0	0	0	0	0	0	0	0	0	0	0	0	0	0	0
RPS_02	2.07	2.56	3.37	7.23	1.53	4469.858154	7367.7125	74.4847	0.5848	5.9336	7.9501	1.257	0.1219	0	0	0.9279	8.5626	0	0.1774	0	0	0	0	0	0	0	0	0	0	0	0	0	0	0	0	0	0	0	0	0	0	0	0	0	0	0	0	0	0
RPS_02	0.94	1.51	0.69	4.63	2.59	4577.100098	7364.5225	92.7847	0.583	3.3574	1.7927	0.2153	0	0	0	0.1512	1.1157	0	0	0	0	0	0	0	0	0	0	0	0	0	0	0	0	0	0	0	0	0	0	0	0	0	0	0	0	0	0	0	0
RPS_02	3.84	4.62	11.6	13.31	1.44	4471.16333	7359.81	53.9283	1.3856	26.0521	0.1409	1.0265	7.1318	8.6527	0	0	0	0.2114	0.2222	0	0	0	0	1.2486	0	0	0	0	0	0	0	0	0	0	0	0	0	0	0	0	0	0	0	0	0	0	0	0	0
RPS_02	3.14	4.08	7.77	11.72	1.69	4593.487305	7357.345	70.1796	0.6622	6.652	9.4354	0.9115	0	0	0	1.3458	10.1775	0	0.6358	0	0	0	0	0	0	0	0	0	0	0	0	0	0	0	0	0	0	0	0	0	0	0	0	0	0	0	0	0	0
RPS_02	1.73	2.15	2.34	5.79	1.55	4586.381348	7325.445	87.6267	0.7826	4.9223	2.8774	0.3467	0	0	0	0.4272	2.8279	0	0.1891	0	0	0	0	0	0	0	0	0	0	0	0	0	0	0	0	0	0	0	0	0	0	0	0	0	0	0	0	0	0
RPS_02	3.25	3.94	8.29	11	1.47	4606.539063	7312.25	72.5382	0.8738	6.3381	8.9273	0.9497	0	0	0	0.961	9.1131	0	0.2988	0	0	0	0	0	0	0	0	0	0	0	0	0	0	0	0	0	0	0	0	0	0	0	0	0	0	0	0	0	0
RPS_02	3.25	4.24	8.29	11.43	1.7	4510.971191	7308.77	62.7785	0	6.2593	13.9135	1.0387	0	0.1579	0	0.8447	14.4407	0	0.292	0	0	0	0	0	0.2747	0	0	0	0	0	0	0	0	0	0	0	0	0	0	0	0	0	0	0	0	0	0	0	0
RPS_02	1.77	2.02	2.47	5.64	1.29	4489.508301	7302.535	84.2126	0.588	5.5403	4.3062	0.6131	0	0	0	0.5387	4.0265	0	0.1746	0	0	0	0	0	0	0	0	0	0	0	0	0	0	0	0	0	0	0	0	0	0	0	0	0	0	0	0	0	0
RPS_02	1.74	1.88	2.39	5.35	1.16	4508.795898	7300.4325	85.4304	0.6981	4.3269	4.4405	0.4005	0	0	0	0.1638	4.5399	0	0	0	0	0	0	0	0	0	0	0	0	0	0	0	0	0	0	0	0	0	0	0	0	0	0	0	0	0	0	0	0
RPS_02	1.72	2.05	2.32	5.79	1.42	4512.711426	7300.4325	88.0597	1.0371	4.7489	2.8185	0.3861	0	0	0	0	2.9497	0	0	0	0	0	0	0	0	0	0	0	0	0	0	0	0	0	0	0	0	0	0	0	0	0	0	0	0	0	0	0	0
RPS_02	2.01	2.49	3.18	6.51	1.53	4487.478027	7290.935	82.079	0.9133	4.9012	5.5326	0.4047	0	0	0	0.1366	6.0325	0	0	0	0	0	0	0	0	0	0	0	0	0	0	0	0	0	0	0	0	0	0	0	0	0	0	0	0	0	0	0	0
RPS_02	6.29	7.18	31.07	24.74	1.3	4478.776855	7271.4175	33.9432	2.1346	35.3172	0.1435	0	2.0925	25.1531	0	0	0	0	0.1717	0	0.1852	0.2321	0.2385	0.3884	0	0	0	0	0	0	0	0	0	0	0	0	0	0	0	0	0	0	0	0	0	0	0	0	0
RPS_02	1.52	1.88	1.82	4.92	1.53	4512.856445	7263.1525	93.4289	1.0559	3.0702	1.1957	0	0	0	0	0	1.2493	0	0	0	0	0	0	0	0	0	0	0	0	0	0	0	0	0	0	0	0	0	0	0	0	0	0	0	0	0	0	0	0
RPS_02	1.83	2.21	2.64	5.79	1.45	4564.628418	7260.47	88.9075	0.7993	3.2361	3.3343	0.1369	0	0	0	0.14	3.446	0	0	0	0	0	0	0	0	0	0	0	0	0	0	0	0	0	0	0	0	0	0	0	0	0	0	0	0	0	0	0	0
RPS_02	1.69	2.07	2.24	5.5	1.5	4559.842773	7257.2075	87.2687	0.6401	3.9369	3.7538	0.1656	0	0	0	0.3291	3.9059	0	0	0	0	0	0	0	0	0	0	0	0	0	0	0	0	0	0	0	0	0	0	0	0	0	0	0	0	0	0	0	0
RPS_02	7.22	8.91	40.99	31.54	1.52	4491.973633	7252.1325	59.8709	1.8345	24.8141	0	0.8416	2.8182	7.7664	0	0	0.3039	0.3194	0.6019	0	0	0	0	0.829	0	0	0	0	0	0	0	0	0	0	0	0	0	0	0	0	0	0	0	0	0	0	0	0	0
RPS_02	6.27	7.37	30.84	25.32	1.38	4487.478027	7239.5175	48.9712	2.0248	30.2614	0.1012	0.5786	6.2198	9.4287	0	0	0.2585	0.431	0.4563	0	0	0	0	1.2685	0	0	0	0	0	0	0	0	0	0	0	0	0	0	0	0	0	0	0	0	0	0	0	0	0
RPS_02	3.24	4.53	8.27	11.14	1.95	4543.455566	7241.475	71.6872	0.5511	8.7561	6.9676	1.7349	0	0	0	1.7524	7.7195	0.1593	0.6719	0	0	0	0	0	0	0	0	0	0	0	0	0	0	0	0	0	0	0	0	0	0	0	0	0	0	0	0	0	0
RPS_02	2.49	3.24	4.86	8.68	1.69	4480.51709	7231.035	83.0279	0.7924	3.1215	6.186	0	0	0	0	0.1615	6.7108	0	0	0	0	0	0	0	0	0	0	0	0	0	0	0	0	0	0	0	0	0	0	0	0	0	0	0	0	0	0	0	0
RPS_02	3.93	4.51	12.12	12.3	1.32	4565.135986	7197.25	49.9265	0	4.822	21.1159	0.6593	0	0	0	0.3901	22.0372	0.2309	0.2111	0	0	0	0.2222	0	0.3848	0	0	0	0	0	0	0	0	0	0	0	0	0	0	0	0	0	0	0	0	0	0	0	0
RPS_02	2.62	3.9	5.4	11.14	2.21	4571.879395	7193.19	73.0331	0	4.2357	10.5708	0.4002	0	0	0	0.3615	11.3987	0	0	0	0	0	0	0	0	0	0	0	0	0	0	0	0	0	0	0	0	0	0	0	0	0	0	0	0	0	0	0	0
RPS_02	2.07	4.17	3.37	9.69	4.06	4571.589355	7190.435	87.2462	1.0684	7.2519	0.7078	0.407	0	0.1146	0	1.5073	0.4535	0.1837	1.0597	0	0	0	0	0	0	0	0	0	0	0	0	0	0	0	0	0	0	0	0	0	0	0	0	0	0	0	0	0	0
RPS_02	2.93	5.1	6.74	14.61	3.03	4516.336914	7186.375	89.4749	1.3644	6.4349	1.0913	0.4136	0	0	0	0.2588	0.9621	0	0	0	0	0	0	0	0	0	0	0	0	0	0	0	0	0	0	0	0	0	0	0	0	0	0	0	0	0	0	0	0
RPS_02	1.56	2.17	1.9	5.35	1.94	4504.155273	7184.9975	86.3445	0.7503	4.7225	3.7803	0.3667	0	0	0	0.2306	3.8052	0	0	0	0	0	0	0	0	0	0	0	0	0	0	0	0	0	0	0	0	0	0	0	0	0	0	0	0	0	0	0	0
RPS_02	4.57	5.51	16.37	18.81	1.46	4575.939941	7180.865	70.6503	1.6328	17.8044	1.3067	0.8921	1.5266	2.1024	0	0.4193	1.6316	0.1707	1.3455	0	0	0	0	0.5177	0	0	0	0	0	0	0	0	0	0	0	0	0	0	0	0	0	0	0	0	0	0	0	0	0
RPS_02	3.05	3.66	7.29	9.98	1.44	4530.548828	7179.85	75.2047	1.2881	6.4814	7.4097	0.7285	0	0	0	0.8981	7.7162	0	0.2732	0	0	0	0	0	0	0	0	0	0	0	0	0	0	0	0	0	0	0	0	0	0	0	0	0	0	0	0	0	0
RPS_02	2.38	2.67	4.46	8.1	1.25	4569.124023	7179.125	74.0375	0.5294	5.243	8.7891	0.9378	0	0	0	0.4655	9.5999	0.2148	0.183	0	0	0	0	0	0	0	0	0	0	0	0	0	0	0	0	0	0	0	0	0	0	0	0	0	0	0	0	0	0
RPS_02	2.28	2.72	4.08	7.38	1.42	4521.557617	7179.125	76.5561	0.7075	4.9831	8.4469	0.4108	0	0	0	0	8.8956	0	0	0	0	0	0	0	0	0	0	0	0	0	0	0	0	0	0	0	0	0	0	0	0	0	0	0	0	0	0	0	0
RPS_02	2.85	3.58	6.36	9.69	1.58	4515.321777	7177.53	67.6435	0	4.501	13.1083	0.5524	0	0	0	0.2166	13.4381	0.154	0.1776	0	0	0	0	0.2085	0	0	0	0	0	0	0	0	0	0	0	0	0	0	0	0	0	0	0	0	0	0	0	0	0
RPS_02	1.78	1.9	2.49	5.64	1.14	4522.282715	7167.815	89.334	0.9107	3.4303	3.0785	0.1665	0	0	0	0	3.08	0	0	0	0	0	0	0	0	0	0	0	0	0	0	0	0	0	0	0	0	0	0	0	0	0	0	0	0	0	0	0	0
RPS_02	4.23	6.41	14.05	18.95	2.3	4387.261963	7260.325	71.0751	0.7723	6.4332	9.3931	1.164	0	0	0	0.845	10.1138	0	0.2035	0	0	0	0	0	0	0	0	0	0	0	0	0	0	0	0	0	0	0	0	0	0	0	0	0	0	0	0	0	0
RPS_02	2.27	2.66	4.04	7.67	1.37	4331.066895	7246.115	86.4278	0.6474	3.7989	4.2432	0.2813	0	0	0	0.3589	4.2425	0	0	0	0	0	0	0	0	0	0	0	0	0	0	0	0	0	0	0	0	0	0	0	0	0	0	0	0	0	0	0	0
RPS_02	7.33	9.73	42.16	36.03	1.76	4443.602051	7204.645	41.9342	1.7568	34.1678	0.4998	0.5175	7.4646	9.6495	0	0.4815	0.553	0.5107	0.7397	0.2668	0	0	0	1.237	0.2211	0	0	0	0	0	0	0	0	0	0	0	0	0	0	0	0	0	0	0	0	0	0	0	0
RPS_02	4.82	6.13	18.23	19.24	1.62	4354.850098	7190.3625	64.5667	1.1659	18.229	2.7951	0.4583	0.6775	7.1814	0	0.3603	3.5338	0	0.7584	0	0	0	0	0.2736	0	0	0	0	0	0	0	0	0	0	0	0	0	0	0	0	0	0	0	0	0	0	0	0	0
RPS_02	1.59	2.15	1.99	6.22	1.83	4407.637207	7185.795	92.5034	0.8848	4.2873	1.006	0.254	0	0	0	0.1567	0.9078	0	0	0	0	0	0	0	0	0	0	0	0	0	0	0	0	0	0	0	0	0	0	0	0	0	0	0	0	0	0	0	0
RPS_02	2.99	3.63	7.03	10.56	1.47	4401.546387	7184.2	61.8877	0.5731	4.0193	16.1517	0.3287	0	0	0	0.6194	16.4201	0	0	0	0	0	0	0	0	0	0	0	0	0	0	0	0	0	0	0	0	0	0	0	0	0	0	0	0	0	0	0	0
RPS_02	1.11	1.37	0.96	3.76	1.54	4405.461914	7185.2875	91.0454	0	1.9246	2.4842	0.3348	0	0	0	1.1	2.3494	0	0.7616	0	0	0	0	0	0	0	0	0	0	0	0	0	0	0	0	0	0	0	0	0	0	0	0	0	0	0	0	0	0
RPS_02	1.66	2.15	2.18	5.35	1.67	4329.181641	7173.5425	88.6495	0.8804	3.601	3.1334	0.1502	0	0	0	0.2099	3.3755	0	0	0	0	0	0	0	0	0	0	0	0	0	0	0	0	0	0	0	0	0	0	0	0	0	0	0	0	0	0	0	0
RPS_02	3.04	3.34	7.26	9.98	1.21	4360.070801	7170.28	80.3269	0.8031	3.4722	7.3809	0.1738	0	0	0	0.272	7.5711	0	0	0	0	0	0	0	0	0	0	0	0	0	0	0	0	0	0	0	0	0	0	0	0	0	0	0	0	0	0	0	0
RPS_02	4.12	5.19	13.31	15.05	1.59	4346.003906	7165.35	51.8353	0	6.2838	18.8294	1.1279	0	0	0	1.6036	19.3142	0.2581	0.7477	0	0	0	0	0	0	0	0	0	0	0	0	0	0	0	0	0	0	0	0	0	0	0	0	0	0	0	0	0	0
RPS_02	3.82	5.44	11.47	13.17	2.02	4194.958496	7274.245	69.8861	0	4.8345	10.6468	0.8927	0	0	0	0.8051	12.0884	0.2417	0.3686	0	0	0	0	0	0.236	0	0	0	0	0	0	0	0	0	0	0	0	0	0	0	0	0	0	0	0	0	0	0	0
RPS_02	4.2	4.86	13.88	14.47	1.34	4304.520752	7269.5325	62.6567	0	4.7117	14.9083	0.7517	0	0	0	0.9779	15.4069	0.2024	0.3845	0	0	0	0	0	0	0	0	0	0	0	0	0	0	0	0	0	0	0	0	0	0	0	0	0	0	0	0	0	0
RPS_02	2.35	3.69	4.35	9.55	2.45	4294.659424	7264.7475	86.2104	0.8246	3.6609	4.3316	0.1683	0	0	0	0.2104	4.5938	0	0	0	0	0	0	0	0	0	0	0	0	0	0	0	0	0	0	0	0	0	0	0	0	0	0	0	0	0	0	0	0
RPS_02	5.63	6.77	24.87	30.53	1.45	4239.769531	7250.5375	40.8784	1.7687	34.2206	0.1574	0.1784	2.0795	20.3591	0	0	0	0	0	0	0	0	0	0.3579	0	0	0	0	0	0	0	0	0	0	0	0	0	0	0	0	0	0	0	0	0	0	0	0	0
RPS_02	1.8	2.02	2.55	5.64	1.25	4177.991211	7238.9375	85.6179	0.8516	3.9674	4.4346	0.1965	0	0	0	0.3083	4.6238	0	0	0	0	0	0	0	0	0	0	0	0	0	0	0	0	0	0	0	0	0	0	0	0	0	0	0	0	0	0	0	0
RPS_02	2.56	3.2	5.13	8.83	1.57	4194.668457	7233.5	80.6184	1.0027	3.5479	7.0715	0.1669	0	0	0	0.2523	7.3402	0	0	0	0	0	0	0	0	0	0	0	0	0	0	0	0	0	0	0	0	0	0	0	0	0	0	0	0	0	0	0	0
RPS_02	4.1	4.28	13.19	14.47	1.09	4207.575195	7224.51	50.5028	1.2431	25.8551	1.9331	0.3984	0.5695	16.1875	0	0.398	1.8173	0	0.2355	0	0	0	0.2191	0.3979	0.2428	0	0	0	0	0	0	0	0	0	0	0	0	0	0	0	0	0	0	0	0	0	0	0	0
RPS_02	3.01	3.84	7.12	9.84	1.63	4215.116211	7223.785	77.7093	1.2288	8.3794	4.9306	1.122	0	0	0	0.9964	5.2388	0	0.3947	0	0	0	0	0	0	0	0	0	0	0	0	0	0	0	0	0	0	0	0	0	0	0	0	0	0	0	0	0	0
RPS_02	7.41	9.09	43.15	32.41	1.5	4258.332031	7194.7125	53.2528	0.5549	8.8395	16.5029	1.5417	0	0	0	1.2686	17.0268	0.2935	0.5141	0	0	0	0	0.2052	0	0	0	0	0	0	0	0	0	0	0	0	0	0	0	0	0	0	0	0	0	0	0	0	0
RPS_02	2.2	2.43	3.79	6.95	1.22	4310.539063	7193.335	75.475	0.8663	5.1896	8.5527	0.8792	0	0	0	0.4632	8.5741	0	0	0	0	0	0	0	0	0	0	0	0	0	0	0	0	0	0	0	0	0	0	0	0	0	0	0	0	0	0	0	0
RPS_02	4.37	5.83	14.99	18.23	1.78	4211.055664	7190.725	55.2798	1.5877	23.8948	2.7974	0.1658	4.5479	4.8967	0	0.3341	2.6954	0	0	0.1919	0	0	0	3.6084	0	0	0	0	0	0	0	0	0	0	0	0	0	0	0	0	0	0	0	0	0	0	0	0	0
RPS_02	2.92	3.86	6.68	10.85	1.75	4189.447754	7178.11	74.6576	1.183	14.4218	0	0.133	3.1935	5.4187	0	0	0	0.2565	0	0	0	0	0	0.736	0	0	0	0	0	0	0	0	0	0	0	0	0	0	0	0	0	0	0	0	0	0	0	0	0
RPS_02	2.18	2.46	3.73	6.8	1.28	4097.135254	7272.795	85.2857	0.9274	4.3173	3.7583	0.5452	0	0	0	1.0135	3.76	0	0.3928	0	0	0	0	0	0	0	0	0	0	0	0	0	0	0	0	0	0	0	0	0	0	0	0	0	0	0	0	0	0
RPS_02	3.19	3.9	8	11.72	1.49	4119.90332	7251.625	71.2812	0.6469	3.2229	11.7725	0.2292	0	0	0	0.3779	12.3108	0.1585	0	0	0	0	0	0	0	0	0	0	0	0	0	0	0	0	0	0	0	0	0	0	0	0	0	0	0	0	0	0	0
RPS_02	2.96	3.95	6.87	11	1.79	4072.771973	7248.5075	82.6223	1.7476	11.4494	0	0.1579	1.2708	2.1845	0	0	0	0	0	0	0	0	0	0.5675	0	0	0	0	0	0	0	0	0	0	0	0	0	0	0	0	0	0	0	0	0	0	0	0	0
RPS_02	3.61	4.17	10.26	13.17	1.33	4130.054688	7244.085	70.897	0.8815	6.0149	9.7788	0.5776	0	0	0	1.1585	10.043	0	0.6486	0	0	0	0	0	0	0	0	0	0	0	0	0	0	0	0	0	0	0	0	0	0	0	0	0	0	0	0	0	0
RPS_02	4.57	5.4	16.39	15.34	1.4	4049.568848	7238.0675	59.8939	1.5447	24.4455	0.693	0.7082	4.0285	7.1522	0	0	0.1416	0.1717	0	0	0	0	0	1.2207	0	0	0	0	0	0	0	0	0	0	0	0	0	0	0	0	0	0	0	0	0	0	0	0	0
RPS_02	1.89	2.88	2.81	8.54	2.33	4104.966309	7238.575	88.657	1.2508	7.1562	0	0	0.303	2.6329	0	0	0	0	0	0	0	0	0	0	0	0	0	0	0	0	0	0	0	0	0	0	0	0	0	0	0	0	0	0	0	0	0	0	0
RPS_02	3.08	4.44	7.45	10.56	2.08	4083.720947	7220.5225	76.6651	1.6411	14.1676	0.1307	0.2587	1.3754	2.9552	0	0	0	0	0.2291	0	0	0	0	2.5771	0	0	0	0	0	0	0	0	0	0	0	0	0	0	0	0	0	0	0	0	0	0	0	0	0
RPS_02	2.22	2.84	3.87	7.67	1.64	4087.056396	7220.5225	80.6742	1.4106	12.1907	0.1034	0	0	5.6211	0	0	0	0	0	0	0	0	0	0	0	0	0	0	0	0	0	0	0	0	0	0	0	0	0	0	0	0	0	0	0	0	0	0	0
RPS_02	1.81	2.17	2.57	6.22	1.44	4059.285156	7219.145	88.3422	0.9829	3.259	3.455	0.1264	0	0	0	0.1861	3.6485	0	0	0	0	0	0	0	0	0	0	0	0	0	0	0	0	0	0	0	0	0	0	0	0	0	0	0	0	0	0	0	0
RPS_02	1.85	2.07	2.7	6.08	1.25	4052.469238	7217.55	84.49	0.8392	3.621	5.1641	0.1977	0	0	0	0.2252	5.4628	0	0	0	0	0	0	0	0	0	0	0	0	0	0	0	0	0	0	0	0	0	0	0	0	0	0	0	0	0	0	0	0
RPS_02	3.05	3.69	7.31	11.86	1.46	4037.822266	7215.665	74.5759	1.5825	16.1233	0.1284	0.4409	1.9744	3.7074	0	0	0	0.2298	0.3469	0	0	0	0	0.8906	0	0	0	0	0	0	0	0	0	0	0	0	0	0	0	0	0	0	0	0	0	0	0	0	0
RPS_02	1.38	1.76	1.49	4.34	1.64	4057.254883	7202.9775	91.5803	0.9819	3.7355	1.6996	0.1481	0	0	0	0.1363	1.7184	0	0	0	0	0	0	0	0	0	0	0	0	0	0	0	0	0	0	0	0	0	0	0	0	0	0	0	0	0	0	0	0
RPS_02	3.29	4.01	8.48	10.27	1.49	4090.029297	7201.31	58.5565	0	6.9201	15.1265	1.3872	0	0	0	1.0251	15.9768	0.1918	0.5417	0	0	0	0	0	0.2743	0	0	0	0	0	0	0	0	0	0	0	0	0	0	0	0	0	0	0	0	0	0	0	0
RPS_02	2.37	3.63	4.4	7.81	2.35	4053.194336	7191.16	85.1181	0.6179	3.3733	5.0229	0.1649	0	0	0	0.3111	5.3917	0	0	0	0	0	0	0	0	0	0	0	0	0	0	0	0	0	0	0	0	0	0	0	0	0	0	0	0	0	0	0	0
RPS_02	1.11	1.33	0.96	3.47	1.45	4121.208496	7165.7125	91.5536	0.9129	3.5039	2.0002	0	0	0	0	0	2.0294	0	0	0	0	0	0	0	0	0	0	0	0	0	0	0	0	0	0	0	0	0	0	0	0	0	0	0	0	0	0	0	0
RPS_02	1.99	2.36	3.1	6.22	1.41	3924.046875	7266.415	82.6623	0.8901	3.8287	5.8548	0.1798	0	0	0	0.3222	6.262	0	0	0	0	0	0	0	0	0	0	0	0	0	0	0	0	0	0	0	0	0	0	0	0	0	0	0	0	0	0	0	0
RPS_02	1.45	1.65	1.65	4.92	1.29	3952.615723	7250.5375	87.9426	0.8125	4.2679	3.2826	0.2397	0	0	0	0	3.4547	0	0	0	0	0	0	0	0	0	0	0	0	0	0	0	0	0	0	0	0	0	0	0	0	0	0	0	0	0	0	0	0
RPS_02	3.49	3.88	9.59	11	1.23	3983.069824	7248.5075	50.6781	1.9724	29.8727	0	0.4248	1.7576	14.5781	0	0	0	0.2156	0	0	0	0	0	0.5008	0	0	0	0	0	0	0	0	0	0	0	0	0	0	0	0	0	0	0	0	0	0	0	0	0
RPS_02	6.8	9.9	36.28	42.68	2.12	3950.077881	7239.735	59.4895	1.4245	22.143	2.8889	0.8002	2.7793	3.9308	0	0.6807	3.1921	0.4983	1.0583	0	0	0	0	0.8711	0.2434	0	0	0	0	0	0	0	0	0	0	0	0	0	0	0	0	0	0	0	0	0	0	0	0
RPS_02	2.27	2.76	4.04	7.38	1.49	3924.916992	7237.27	78.7372	0.5549	2.8303	8.5047	0.1672	0	0	0	0	9.2056	0	0	0	0	0	0	0	0	0	0	0	0	0	0	0	0	0	0	0	0	0	0	0	0	0	0	0	0	0	0	0	0
RPS_02	1.74	2.07	2.39	5.79	1.41	3945.074707	7234.37	85.3029	0.7315	2.8857	5.3327	0	0	0	0	0	5.7471	0	0	0	0	0	0	0	0	0	0	0	0	0	0	0	0	0	0	0	0	0	0	0	0	0	0	0	0	0	0	0	0
RPS_02	1.85	2.43	2.7	6.22	1.71	3942.754395	7231.76	87.6848	0.6207	2.1461	4.6271	0	0	0	0	0	4.9213	0	0	0	0	0	0	0	0	0	0	0	0	0	0	0	0	0	0	0	0	0	0	0	0	0	0	0	0	0	0	0	0
RPS_02	4.81	7.18	18.19	24.02	2.23	3911.430176	7217.7675	71.8791	1.932	16.9678	0.1253	0.2055	0.5131	1.0029	0	0	0	0	7.3744	0	0	0	0	0	0	0	0	0	0	0	0	0	0	0	0	0	0	0	0	0	0	0	0	0	0	0	0	0	0
RPS_02	26.67	38.77	558.49	133.98	2.11	3985.970215	7195.655	34.5161	0	15.5006	23.8082	0.9447	0.1039	0	0	2.7709	20.3834	0.4413	1.5308	0	0	0	0	0	0	0	0	0	0	0	0	0	0	0	0	0	0	0	0	0	0	0	0	0	0	0	0	0	0
RPS_02	2.09	2.34	3.43	6.8	1.25	3933.763184	7195.945	79.679	0.9371	5.0232	6.136	0.6617	0	0.3244	0	0.3496	6.8889	0	0	0	0	0	0	0	0	0	0	0	0	0	0	0	0	0	0	0	0	0	0	0	0	0	0	0	0	0	0	0	0
RPS_02	3.4	4.14	9.09	12.15	1.48	3935.503418	7192.175	61.4592	1.3327	21.8744	0.1177	0.2448	0.79	13.9266	0	0	0	0	0	0	0	0	0	0.2545	0	0	0	0	0	0	0	0	0	0	0	0	0	0	0	0	0	0	0	0	0	0	0	0	0
RPS_02	2.31	3.21	4.21	8.54	1.93	3914.185547	7188.26	86.0512	1.0916	9.7299	0	0.1008	0.9849	1.5686	0	0	0	0	0	0	0	0	0	0.4731	0	0	0	0	0	0	0	0	0	0	0	0	0	0	0	0	0	0	0	0	0	0	0	0	0
RPS_02	3.82	4.44	11.47	14.47	1.35	3935.068359	7179.415	68.4342	0	7.6634	10.5263	1.6095	0	0	0	0.5724	11.1942	0	0	0	0	0	0	0	0	0	0	0	0	0	0	0	0	0	0	0	0	0	0	0	0	0	0	0	0	0	0	0	0
RPS_02	1.69	2.4	2.24	6.66	2.01	3918.536133	7180.14	89.626	0.6011	4.2277	2.3616	0.291	0	0	0	0.6706	1.8741	0	0.3479	0	0	0	0	0	0	0	0	0	0	0	0	0	0	0	0	0	0	0	0	0	0	0	0	0	0	0	0	0	0
RPS_02	2.44	2.85	4.69	8.1	1.36	3909.544922	7174.63	75.3752	0.6132	3.5098	9.7946	0.219	0	0	0	0.2897	10.1985	0	0	0	0	0	0	0	0	0	0	0	0	0	0	0	0	0	0	0	0	0	0	0	0	0	0	0	0	0	0	0	0
RPS_02	6.06	7.47	28.83	25.03	1.52	3884.891602	7169.3375	53.6604	1.7478	25.4375	2.0015	0.8781	4.8914	6.9202	0	0.1437	1.9844	1.5187	0	0	0	0	0	0.8164	0	0	0	0	0	0	0	0	0	0	0	0	0	0	0	0	0	0	0	0	0	0	0	0	0
RPS_02	1.9	2.98	2.85	7.09	2.45	3988.725586	7171.44	88.6474	1.249	7.3941	0.4457	0.7388	0.2428	0.4288	0	0.3162	0.5373	0	0	0	0	0	0	0	0	0	0	0	0	0	0	0	0	0	0	0	0	0	0	0	0	0	0	0	0	0	0	0	0
RPS_02	1.24	1.43	1.21	3.76	1.31	4018.744629	7165.1325	91.9524	0.6556	5.3776	0.7714	0.3157	0.1072	0.1567	0	0	0.3512	0.3121	0	0	0	0	0	0	0	0	0	0	0	0	0	0	0	0	0	0	0	0	0	0	0	0	0	0	0	0	0	0	0
RPS_02	1.51	1.85	1.78	4.63	1.52	3748.928223	7257.2075	90.6593	0.8961	3.184	2.3746	0.1674	0	0	0	0.2249	2.4937	0	0	0	0	0	0	0	0	0	0	0	0	0	0	0	0	0	0	0	0	0	0	0	0	0	0	0	0	0	0	0	0
RPS_02	1.84	2.2	2.66	5.5	1.43	3745.157715	7253.945	83.7318	0.5597	3.0129	5.8551	0.1685	0	0	0	0.245	6.4271	0	0	0	0	0	0	0	0	0	0	0	0	0	0	0	0	0	0	0	0	0	0	0	0	0	0	0	0	0	0	0	0
RPS_02	1.66	2.11	2.18	5.35	1.6	3750.233398	7244.955	90.88	0.9256	4.03	1.9009	0.2191	0	0	0	0	2.0444	0	0	0	0	0	0	0	0	0	0	0	0	0	0	0	0	0	0	0	0	0	0	0	0	0	0	0	0	0	0	0	0
RPS_02	2.49	3.12	4.86	9.98	1.58	3772.421387	7235.3125	79.7307	0.7041	5.3767	6.2028	0.3939	0	0	0	0.65	6.5591	0	0.3828	0	0	0	0	0	0	0	0	0	0	0	0	0	0	0	0	0	0	0	0	0	0	0	0	0	0	0	0	0	0
RPS_02	1.35	1.62	1.42	4.2	1.44	3777.062012	7226.3225	91.3212	0.9046	3.1268	2.1875	0.1129	0	0	0	0	2.3469	0	0	0	0	0	0	0	0	0	0	0	0	0	0	0	0	0	0	0	0	0	0	0	0	0	0	0	0	0	0	0	0
RPS_02	6.16	9.42	29.81	27.64	2.34	3806.065918	7203.05	58.0878	1.5984	23.8799	1.6182	2.6953	2.1709	4.8038	0	0.5969	1.9607	0.3141	1.3259	0	0	0	0	0.9481	0	0	0	0	0	0	0	0	0	0	0	0	0	0	0	0	0	0	0	0	0	0	0	0	0
RPS_02	1.42	1.74	1.59	4.34	1.5	3777.49707	7193.4075	89.7313	0.8186	4.382	2.247	0.2603	0	0	0	0.1521	2.4087	0	0	0	0	0	0	0	0	0	0	0	0	0	0	0	0	0	0	0	0	0	0	0	0	0	0	0	0	0	0	0	0
RPS_02	1.35	1.56	1.42	4.49	1.34	3847.251465	7184.7075	90.0835	0.6943	5.7131	1.472	0.3521	0	0	0	0.182	1.5031	0	0	0	0	0	0	0	0	0	0	0	0	0	0	0	0	0	0	0	0	0	0	0	0	0	0	0	0	0	0	0	0
RPS_02	1.65	1.93	2.14	5.64	1.37	3838.985352	7179.56	88.4097	1.0255	6.5321	1.3345	0.813	0	0	0	0.2664	1.6189	0	0	0	0	0	0	0	0	0	0	0	0	0	0	0	0	0	0	0	0	0	0	0	0	0	0	0	0	0	0	0	0
RPS_02	2.64	3.25	5.46	9.69	1.52	3831.299316	7172.02	73.4826	0.7297	7.4144	7.5912	0.7884	0	0	0	1.3631	7.5425	0.2239	0.8643	0	0	0	0	0	0	0	0	0	0	0	0	0	0	0	0	0	0	0	0	0	0	0	0	0	0	0	0	0	0
RPS_02	1.6	1.94	2.01	5.21	1.47	3817.232422	7166.8	91.5194	0.7677	3.2027	2.1395	0	0	0	0	0	2.3707	0	0	0	0	0	0	0	0	0	0	0	0	0	0	0	0	0	0	0	0	0	0	0	0	0	0	0	0	0	0	0	0
RPS_02	3.87	4.78	11.77	16.35	1.52	3803.165527	7164.045	70.4534	0.9179	13.1141	3.472	0.4825	0.129	0.213	0	0.1316	3.3444	0	7.7421	0	0	0	0	0	0	0	0	0	0	0	0	0	0	0	0	0	0	0	0	0	0	0	0	0	0	0	0	0	0
RPS_02	1.74	1.94	2.37	5.64	1.25	3670.682617	7270.185	87.2842	0.8623	5.0036	3.0951	0.4138	0	0	0	0.2907	3.0503	0	0	0	0	0	0	0	0	0	0	0	0	0	0	0	0	0	0	0	0	0	0	0	0	0	0	0	0	0	0	0	0
RPS_02	5.11	6.28	20.49	17.22	1.51	3590.776855	7267.6475	57.4548	0.6053	10.5295	12.7758	1.735	0	0.1111	0	1.9181	13.8101	0.3391	0.7213	0	0	0	0	0	0	0	0	0	0	0	0	0	0	0	0	0	0	0	0	0	0	0	0	0	0	0	0	0	0
RPS_02	2.61	3.21	5.34	9.26	1.52	3706.647461	7266.415	74.9164	0.806	3.8679	9.378	0.3432	0	0	0	0.2135	10.475	0	0	0	0	0	0	0	0	0	0	0	0	0	0	0	0	0	0	0	0	0	0	0	0	0	0	0	0	0	0	0	0
RPS_02	2.55	3.11	5.09	8.1	1.49	3652.700195	7254.96	79.9594	0.9801	8.5118	3.2904	0.8155	0.1834	0.2746	0	1.7579	3.2118	0.2132	0.8018	0	0	0	0	0	0	0	0	0	0	0	0	0	0	0	0	0	0	0	0	0	0	0	0	0	0	0	0	0	0
RPS_02	1.23	1.37	1.19	3.76	1.24	3646.899414	7249.3775	89.9489	1.1253	3.5103	2.5236	0	0	0	0	0	2.8918	0	0	0	0	0	0	0	0	0	0	0	0	0	0	0	0	0	0	0	0	0	0	0	0	0	0	0	0	0	0	0	0
RPS_02	1.77	2.05	2.47	5.79	1.33	3705.922363	7242.925	91.5574	0.9688	3.8991	1.6137	0	0	0	0	0.2083	1.7526	0	0	0	0	0	0	0	0	0	0	0	0	0	0	0	0	0	0	0	0	0	0	0	0	0	0	0	0	0	0	0	0
RPS_02	2.52	3.01	5	8.1	1.42	3686.924805	7239.88	78.5661	0	3.5199	8.4955	0.2596	0	0	0	0.4934	8.4895	0	0.176	0	0	0	0	0	0	0	0	0	0	0	0	0	0	0	0	0	0	0	0	0	0	0	0	0	0	0	0	0	0
RPS_02	8.17	9.65	52.44	39.21	1.4	3623.116211	7236.1825	55.4412	1.714	26.6585	1.5161	0.4862	4.2047	5.7115	0	0.1793	1.6475	0.3085	0.2988	0	0	0	0	1.8336	0	0	0	0	0	0	0	0	0	0	0	0	0	0	0	0	0	0	0	0	0	0	0	0	0
RPS_02	2.17	2.56	3.68	8.1	1.4	3622.246094	7219.29	82.3512	0.7047	7.4118	3.4547	0.9893	0	0	0	0.9848	3.8227	0	0.2808	0	0	0	0	0	0	0	0	0	0	0	0	0	0	0	0	0	0	0	0	0	0	0	0	0	0	0	0	0	0
RPS_02	1.85	2.09	2.7	5.35	1.27	3718.104004	7209.0675	83.5494	0.8707	3.9034	5.3835	0.1835	0	0	0	0.2935	5.8161	0	0	0	0	0	0	0	0	0	0	0	0	0	0	0	0	0	0	0	0	0	0	0	0	0	0	0	0	0	0	0	0
RPS_02	2.39	2.76	4.48	8.1	1.34	3713.17334	7208.27	69.6926	0	3.1171	12.9497	0.2752	0	0	0	0.3999	13.5655	0	0	0	0	0	0	0	0	0	0	0	0	0	0	0	0	0	0	0	0	0	0	0	0	0	0	0	0	0	0	0	0
RPS_02	1.49	1.83	1.74	5.21	1.51	3699.396484	7205.805	88.0191	0.725	5.2299	2.5442	0.4234	0	0	0	0.7516	2.3067	0	0	0	0	0	0	0	0	0	0	0	0	0	0	0	0	0	0	0	0	0	0	0	0	0	0	0	0	0	0	0	0
RPS_02	1.93	2.33	2.93	6.22	1.46	3582.800781	7205.515	81.1427	0.6959	5.494	5.2984	0.6385	0	0	0	0.5369	5.7024	0.175	0.3163	0	0	0	0	0	0	0	0	0	0	0	0	0	0	0	0	0	0	0	0	0	0	0	0	0	0	0	0	0	0
RPS_02	2.59	3.09	5.25	8.83	1.43	3609.049316	7191.305	82.6394	1.187	11.3357	0	0.2899	1.2155	1.9028	0	0	0	0.1822	0	0	0	0	0	1.2474	0	0	0	0	0	0	0	0	0	0	0	0	0	0	0	0	0	0	0	0	0	0	0	0	0
RPS_02	2.47	3.2	4.77	8.97	1.69	3606.729004	7182.025	77.514	0.9612	5.3275	6.7294	0.5308	0	0	0	0.8381	7.1267	0.1643	0.5757	0	0	0	0	0	0.2323	0	0	0	0	0	0	0	0	0	0	0	0	0	0	0	0	0	0	0	0	0	0	0	0
RPS_02	2.32	2.61	4.23	7.38	1.26	3604.408691	7176.805	72.6105	0.9519	4.974	10.0777	0.5724	0	0	0	0.4554	10.358	0	0	0	0	0	0	0	0	0	0	0	0	0	0	0	0	0	0	0	0	0	0	0	0	0	0	0	0	0	0	0	0
RPS_02	1.57	1.74	1.93	5.21	1.24	3608.03418	7388.8825	88.8236	0.7693	5.2787	1.9533	0.3908	0	0	0	0.5372	1.9404	0	0.3065	0	0	0	0	0	0	0	0	0	0	0	0	0	0	0	0	0	0	0	0	0	0	0	0	0	0	0	0	0	0
RPS_02	7.39	8.69	42.94	26.77	1.38	3641.678711	7376.1225	52.4643	1.8011	25.2661	3.047	1.0347	3.8101	6.9831	0	0.187	3.1532	0.5544	0.3678	0.1879	0	0	0	0.8525	0.2906	0	0	0	0	0	0	0	0	0	0	0	0	0	0	0	0	0	0	0	0	0	0	0	0
RPS_02	1.68	2.11	2.22	5.5	1.57	3700.70166	7372.3525	84.2176	0.8741	4.2685	4.8521	0.3607	0	0	0	0.3242	5.1026	0	0	0	0	0	0	0	0	0	0	0	0	0	0	0	0	0	0	0	0	0	0	0	0	0	0	0	0	0	0	0	0
RPS_02	4.89	6.56	18.78	22.86	1.8	3585.556152	7361.7675	54.169	1.6022	24.8066	2.1945	0.6559	1.212	11.8823	0	0.5157	2.1626	0.1794	0.2522	0	0	0	0	0.3678	0	0	0	0	0	0	0	0	0	0	0	0	0	0	0	0	0	0	0	0	0	0	0	0	0
RPS_02	5.41	6.28	22.99	18.95	1.35	3644.289063	7326.6775	53.0086	1.3791	22.5479	2.9005	2.2734	3.4013	8.9315	0	0.1751	3.0977	0.7698	0.4772	0	0	0	0	1.0378	0	0	0	0	0	0	0	0	0	0	0	0	0	0	0	0	0	0	0	0	0	0	0	0	0
RPS_02	1.13	1.31	1	3.76	1.34	3628.771973	7321.3125	90.9679	0.9294	3.0837	2.3896	0.1178	0	0	0	0	2.5116	0	0	0	0	0	0	0	0	0	0	0	0	0	0	0	0	0	0	0	0	0	0	0	0	0	0	0	0	0	0	0	0
RPS_02	4.47	5.81	15.72	17.65	1.69	3673.00293	7315.73	64.5653	0	5.1729	14.2969	0.9027	0	0	0	0.6833	14.1902	0	0.1886	0	0	0	0	0	0	0	0	0	0	0	0	0	0	0	0	0	0	0	0	0	0	0	0	0	0	0	0	0	0
RPS_02	4.16	4.65	13.61	17.51	1.25	3628.046875	7315.005	62.1719	0	7.1488	13.4603	1.0132	0	0	0	1.3901	14.0274	0.2181	0.5702	0	0	0	0	0	0	0	0	0	0	0	0	0	0	0	0	0	0	0	0	0	0	0	0	0	0	0	0	0	0
RPS_02	1.77	2.07	2.47	6.08	1.36	3682.719238	7313.41	89.5471	1.0511	4.0641	2.4097	0.3038	0	0	0	0	2.6243	0	0	0	0	0	0	0	0	0	0	0	0	0	0	0	0	0	0	0	0	0	0	0	0	0	0	0	0	0	0	0	0
RPS_02	2.26	3.04	4.02	8.1	1.81	3678.078613	7307.465	84.2898	0.6829	3.6459	5.3932	0.1745	0	0	0	0.1591	5.6546	0	0	0	0	0	0	0	0	0	0	0	0	0	0	0	0	0	0	0	0	0	0	0	0	0	0	0	0	0	0	0	0
RPS_02	3.42	4.71	9.17	16.93	1.9	3667.492188	7302.825	62.8202	0	5.7214	14.1064	0.7479	0	0	0	1.1529	14.9637	0	0.4874	0	0	0	0	0	0	0	0	0	0	0	0	0	0	0	0	0	0	0	0	0	0	0	0	0	0	0	0	0	0
RPS_02	6.67	7.16	34.98	26.04	1.15	3716.653809	7300.1425	54.1764	1.222	23.4197	3.6182	0.4293	5.7222	5.9779	0	0.3548	3.8552	0.3309	0.1692	0	0	0	0	0.5041	0.2202	0	0	0	0	0	0	0	0	0	0	0	0	0	0	0	0	0	0	0	0	0	0	0	0
RPS_02	2.78	3.19	6.05	9.4	1.32	3672.712891	7297.605	82.1438	0.8542	2.9378	6.9191	0	0	0	0	0.2089	6.9362	0	0	0	0	0	0	0	0	0	0	0	0	0	0	0	0	0	0	0	0	0	0	0	0	0	0	0	0	0	0	0	0
RPS_02	5.16	6.6	20.91	16.93	1.64	3672.422852	7501.5625	46.6475	2.1051	32.8422	0.1149	3.7941	4.8727	5.9497	0	0	0	0	0	0	0	0	0.1929	3.1064	0.3744	0	0	0	0	0	0	0	0	0	0	0	0	0	0	0	0	0	0	0	0	0	0	0	0
RPS_02	3.07	3.72	7.39	11.29	1.47	3602.233398	7501.2	71.087	0.5891	6.207	9.9999	0.6317	0	0	0	0.8675	10.2087	0	0.4091	0	0	0	0	0	0	0	0	0	0	0	0	0	0	0	0	0	0	0	0	0	0	0	0	0	0	0	0	0	0
RPS_02	2.59	3.02	5.25	9.4	1.36	3629.062012	7498.155	81.3564	0.7746	4.5255	6.3897	0.2518	0	0	0	0	6.702	0	0	0	0	0	0	0	0	0	0	0	0	0	0	0	0	0	0	0	0	0	0	0	0	0	0	0	0	0	0	0	0
RPS_02	1.51	1.65	1.8	4.63	1.19	3630.512207	7492.4275	90.9232	1.1031	4.2564	1.3916	0.4333	0	0	0	0.1986	1.6939	0	0	0	0	0	0	0	0	0	0	0	0	0	0	0	0	0	0	0	0	0	0	0	0	0	0	0	0	0	0	0	0
RPS_02	3.76	4.94	11.1	15.77	1.73	3603.538574	7487.57	64.1273	2.3509	19.3143	0.1017	0.5337	1.8909	3.9139	0	0	0.7218	0.2552	5.5487	0.479	0	0	0	0.7627	0	0	0	0	0	0	0	0	0	0	0	0	0	0	0	0	0	0	0	0	0	0	0	0	0
RPS_02	5.92	6.46	27.53	19.53	1.19	3661.401367	7485.3225	48.6591	1.8909	32.4722	0	0.1682	7.3276	8.044	0	0	0	0.4221	0	0	0	0	0	1.0158	0	0	0	0	0	0	0	0	0	0	0	0	0	0	0	0	0	0	0	0	0	0	0	0	0
RPS_02	2.07	2.58	3.35	6.51	1.56	3622.101074	7486.3375	78.0005	1.1761	6.989	5.8948	1.0859	0	0	0	0.3451	6.5087	0	0	0	0	0	0	0	0	0	0	0	0	0	0	0	0	0	0	0	0	0	0	0	0	0	0	0	0	0	0	0	0
RPS_02	3.37	3.9	8.9	11	1.34	3637.183105	7479.9575	70.9376	1.8683	17.4486	0	3.1906	0.827	1.5389	0	0	0.4427	0	3.4397	0	0	0	0	0.3064	0	0	0	0	0	0	0	0	0	0	0	0	0	0	0	0	0	0	0	0	0	0	0	0	0
RPS_02	3.17	3.94	7.91	10.56	1.54	3626.741699	7475.535	76.9874	0.9154	2.9544	9.2735	0.142	0	0	0	0	9.7272	0	0	0	0	0	0	0	0	0	0	0	0	0	0	0	0	0	0	0	0	0	0	0	0	0	0	0	0	0	0	0	0
RPS_02	2.69	3.5	5.67	9.69	1.69	3706.9375	7469.01	83.1684	1.2869	5.9705	4.3221	0.3723	0	0	0	0.6678	4.2119	0	0	0	0	0	0	0	0	0	0	0	0	0	0	0	0	0	0	0	0	0	0	0	0	0	0	0	0	0	0	0	0
RPS_02	1.94	3.3	2.95	7.38	2.9	3720.714355	7463.355	86.1281	0.8245	6.3986	1.7598	0.6094	0	0	0	1.8196	1.3174	0.2196	0.9229	0	0	0	0	0	0	0	0	0	0	0	0	0	0	0	0	0	0	0	0	0	0	0	0	0	0	0	0	0	0
RPS_02	1.4	2.11	1.55	5.35	2.25	3586.13623	7442.765	89.5083	0	3.358	3.4905	0.2644	0	0	0	0.1706	3.2082	0	0	0	0	0	0	0	0	0	0	0	0	0	0	0	0	0	0	0	0	0	0	0	0	0	0	0	0	0	0	0	0
RPS_02	1.8	2.09	2.53	5.64	1.35	3688.665039	7437.4	85.7993	0.8051	4.4934	3.8949	0.4313	0	0	0	0.2528	4.3233	0	0	0	0	0	0	0	0	0	0	0	0	0	0	0	0	0	0	0	0	0	0	0	0	0	0	0	0	0	0	0	0
RPS_02	1.39	1.56	1.53	4.49	1.25	3674.308105	7421.0875	86.675	0.8364	3.2047	4.2327	0.2609	0	0	0	0.2106	4.5797	0	0	0	0	0	0	0	0	0	0	0	0	0	0	0	0	0	0	0	0	0	0	0	0	0	0	0	0	0	0	0	0
RPS_02	2.67	3.09	5.61	9.26	1.34	3579.465332	7417.245	72.9952	0.5055	6.4417	7.9963	1.0169	0	0	0	1.4437	8.8042	0	0.7967	0	0	0	0	0	0	0	0	0	0	0	0	0	0	0	0	0	0	0	0	0	0	0	0	0	0	0	0	0	0
RPS_02	1.92	2.15	2.89	6.08	1.26	3707.372559	7410.865	79.6536	0.7654	6.2912	5.687	0.9781	0	0	0	0.5276	6.097	0	0	0	0	0	0	0	0	0	0	0	0	0	0	0	0	0	0	0	0	0	0	0	0	0	0	0	0	0	0	0	0
RPS_02	1.22	1.48	1.17	4.2	1.46	3580.480469	7396.5825	81.083	0.9377	10.4732	0	0.3413	2.3827	4.0317	0	0	0	0.2652	0	0	0	0	0	0.4852	0	0	0	0	0	0	0	0	0	0	0	0	0	0	0	0	0	0	0	0	0	0	0	0	0
RPS_02	2.26	3.52	4	8.1	2.44	3706.502441	7393.175	84.2666	0.9932	4.3702	4.974	0.286	0	0	0	0	5.11	0	0	0	0	0	0	0	0	0	0	0	0	0	0	0	0	0	0	0	0	0	0	0	0	0	0	0	0	0	0	0	0
RPS_02	3.3	4.57	8.56	12.01	1.91	3606.874023	7610.98	71.0455	0.9737	7.941	8.3929	0.9552	0	0	0	1.6171	8.3425	0	0.7321	0	0	0	0	0	0	0	0	0	0	0	0	0	0	0	0	0	0	0	0	0	0	0	0	0	0	0	0	0	0
RPS_02	3.74	5.45	10.97	13.17	2.13	3598.317871	7606.5575	58.2626	1.6791	24.7494	0.1296	0.2001	6.4637	7.1527	0	0	0	0.3531	0	0	0	0	0	1.0098	0	0	0	0	0	0	0	0	0	0	0	0	0	0	0	0	0	0	0	0	0	0	0	0	0
RPS_02	3.52	4.09	9.71	12.44	1.35	3657.48584	7604.745	63.4959	0	3.6684	14.9918	0.6163	0	0	0	0.6736	15.4902	0.1777	0.333	0	0	0	0	0.2562	0.2969	0	0	0	0	0	0	0	0	0	0	0	0	0	0	0	0	0	0	0	0	0	0	0	0
RPS_02	3.85	4.39	11.62	12.15	1.3	3611.587158	7599.1625	52.4048	0	6.0988	19.3243	1.3962	0	0	0	0.6131	20.1628	0	0	0	0	0	0	0	0	0	0	0	0	0	0	0	0	0	0	0	0	0	0	0	0	0	0	0	0	0	0	0	0
RPS_02	2.97	3.99	6.91	11.58	1.81	3617.750488	7590.68	78.8506	0.8129	5.6286	6.3218	0.5384	0	0	0	0.8572	6.6448	0	0.3456	0	0	0	0	0	0	0	0	0	0	0	0	0	0	0	0	0	0	0	0	0	0	0	0	0	0	0	0	0	0
RPS_02	3.3	4.38	8.56	13.6	1.76	3602.523438	7563.71	65.297	0	5.1756	13.1869	0.5888	0.1518	0.1381	0	0.8925	13.8266	0.2339	0.5088	0	0	0	0	0	0	0	0	0	0	0	0	0	0	0	0	0	0	0	0	0	0	0	0	0	0	0	0	0	0
RPS_02	2.61	2.98	5.36	8.54	1.3	3600.783203	7555.3	67.5343	0.5496	6.3315	11.9317	0.7746	0	0	0	0.2966	12.5817	0	0	0	0	0	0	0	0	0	0	0	0	0	0	0	0	0	0	0	0	0	0	0	0	0	0	0	0	0	0	0	0
RPS_02	1.99	2.29	3.1	6.8	1.33	3690.550293	7552.835	83.3326	0.8726	5.8971	4.1612	0.8656	0	0	0	0.6781	4.0184	0	0.1745	0	0	0	0	0	0	0	0	0	0	0	0	0	0	0	0	0	0	0	0	0	0	0	0	0	0	0	0	0	0
RPS_02	2.95	3.44	6.82	10.56	1.36	3657.34082	7547.615	76.6111	1.538	13.8899	0	0.9476	2.0623	4.1043	0	0	0	0	0.2418	0	0	0	0	0.6049	0	0	0	0	0	0	0	0	0	0	0	0	0	0	0	0	0	0	0	0	0	0	0	0	0
RPS_02	2.46	3.66	4.75	8.68	2.22	3633.702637	7544.425	86.0175	0.927	4.9775	3.802	0.2649	0	0	0	0.156	3.8551	0	0	0	0	0	0	0	0	0	0	0	0	0	0	0	0	0	0	0	0	0	0	0	0	0	0	0	0	0	0	0	0
RPS_02	1.74	2.09	2.39	5.35	1.43	3686.489746	7542.9025	81.855	0.8408	3.9526	6.0815	0.3953	0	0	0	0.1943	6.6805	0	0	0	0	0	0	0	0	0	0	0	0	0	0	0	0	0	0	0	0	0	0	0	0	0	0	0	0	0	0	0	0
RPS_02	2.53	4.42	5.02	11	3.05	3595.852539	7539.93	77.2792	1.1811	12.9582	0	0	3.5398	3.7459	0	0	0	0.9433	0	0	0	0	0	0.3525	0	0	0	0	0	0	0	0	0	0	0	0	0	0	0	0	0	0	0	0	0	0	0	0	0
RPS_02	6.23	7.13	30.5	23.29	1.31	3669.522461	7520.4275	55.1296	0	6.4426	17.7435	0.987	0	0	0	1.0887	18.3043	0	0.3044	0	0	0	0	0	0	0	0	0	0	0	0	0	0	0	0	0	0	0	0	0	0	0	0	0	0	0	0	0	0
RPS_02	5.24	6.88	21.56	17.51	1.72	3672.712891	7509.8425	48.8879	2.2821	32.0468	0	3.5361	4.6186	5.6517	0	0	0	0	0	0	0	0	0	2.7354	0.2414	0	0	0	0	0	0	0	0	0	0	0	0	0	0	0	0	0	0	0	0	0	0	0	0
RPS_02	3.12	4.12	7.64	12.15	1.74	3603.103516	7509.335	69.6485	0.7926	5.4973	10.5709	0.5933	0	0	0	0.9191	11.2756	0.2026	0.5002	0	0	0	0	0	0	0	0	0	0	0	0	0	0	0	0	0	0	0	0	0	0	0	0	0	0	0	0	0	0
RPS_02	8.08	9.78	51.23	29.23	1.47	3621.230957	7713.655	50.3701	2.1923	30.3747	0	0.2356	7.1023	7.9889	0	0	0	0.9848	0	0	0	0	0	0.7514	0	0	0	0	0	0	0	0	0	0	0	0	0	0	0	0	0	0	0	0	0	0	0	0	0
RPS_02	1.9	2.26	2.83	6.08	1.43	3701.281738	7712.06	83.5467	0.8007	5.6203	4.3091	0.8169	0	0	0	0.423	4.4833	0	0	0	0	0	0	0	0	0	0	0	0	0	0	0	0	0	0	0	0	0	0	0	0	0	0	0	0	0	0	0	0
RPS_02	3.88	5.62	11.81	14.61	2.1	3694.61084	7701.9825	68.2298	0.7691	7.7873	9.47	1.5868	0	0	0	1.1596	10.4989	0	0.4984	0	0	0	0	0	0	0	0	0	0	0	0	0	0	0	0	0	0	0	0	0	0	0	0	0	0	0	0	0	0
RPS_02	5.99	8.35	28.18	23.29	1.94	3658.791016	7692.2675	54.7145	0	8.0068	16.5242	1.5793	0.1017	0	0	1.1114	17.1107	0.271	0.3272	0	0	0	0	0	0.2532	0	0	0	0	0	0	0	0	0	0	0	0	0	0	0	0	0	0	0	0	0	0	0	0
RPS_02	4.45	5.95	15.53	14.32	1.79	3597.810303	7688.7875	62.5854	0.5123	6.1548	13.5912	0.8901	0	0.1173	0	1.4886	14.0256	0	0.6348	0	0	0	0	0	0	0	0	0	0	0	0	0	0	0	0	0	0	0	0	0	0	0	0	0	0	0	0	0	0
RPS_02	6.52	7.62	33.41	24.02	1.36	3680.833984	7686.0325	51.9322	2.1238	29.3508	0.7696	1.4401	3.815	7.4397	0	0	0.6066	0.5334	0.2753	0	0	0	0	1.7137	0	0	0	0	0	0	0	0	0	0	0	0	0	0	0	0	0	0	0	0	0	0	0	0	0
RPS_02	2.41	2.67	4.56	8.1	1.22	3650.959961	7679.435	84.2915	1.2886	10.3402	0	0.1274	0.7981	2.8828	0	0	0	0	0	0	0	0	0	0.2714	0	0	0	0	0	0	0	0	0	0	0	0	0	0	0	0	0	0	0	0	0	0	0	0	0
RPS_02	5.7	7.3	25.48	19.82	1.64	3622.681152	7651.8125	61.1628	2.308	24.233	0.1018	0.4871	0	0.2368	0	0	0.1957	0	10.983	0	0	0	0	0	0.2918	0	0	0	0	0	0	0	0	0	0	0	0	0	0	0	0	0	0	0	0	0	0	0	0
RPS_02	3.59	4.28	10.11	15.63	1.43	3682.574219	7651.015	63.2297	0.5749	7.8556	11.5836	1.3923	0	0.1153	0	1.4402	12.6051	0.2008	0.7737	0	0	0	0	0.2287	0	0	0	0	0	0	0	0	0	0	0	0	0	0	0	0	0	0	0	0	0	0	0	0	0
RPS_02	2.49	3.09	4.86	8.54	1.55	3655.890625	7626.655	71.6415	0.6704	5.4416	9.9408	0.95	0.139	0.1695	0	0.6004	10.4468	0	0	0	0	0	0	0	0	0	0	0	0	0	0	0	0	0	0	0	0	0	0	0	0	0	0	0	0	0	0	0	0
RPS_02	3.4	4.26	9.06	13.17	1.57	3705.052246	7849.1725	78.2514	1.0695	5.0677	6.8903	0.3508	0	0	0	0.9365	7.1109	0	0.3229	0	0	0	0	0	0	0	0	0	0	0	0	0	0	0	0	0	0	0	0	0	0	0	0	0	0	0	0	0	0
RPS_02	1.23	2.26	1.19	5.21	3.36	3701.571777	7848.8825	90.4036	0.7066	2.7709	2.8837	0	0	0	0	0	3.2352	0	0	0	0	0	0	0	0	0	0	0	0	0	0	0	0	0	0	0	0	0	0	0	0	0	0	0	0	0	0	0	0
RPS_02	4.18	4.54	13.73	14.18	1.18	3717.378906	7840.1825	61.9687	1.9604	22.3163	0	0.3395	5.3323	7.3321	0	0	0	0.1942	0	0	0	0	0	0.5565	0	0	0	0	0	0	0	0	0	0	0	0	0	0	0	0	0	0	0	0	0	0	0	0	0
RPS_02	4.48	6.54	15.74	16.64	2.13	3647.769531	7817.49	66.4902	0	4.103	13.6762	0.306	0	0	0	0.6782	14.5202	0	0.2261	0	0	0	0	0	0	0	0	0	0	0	0	0	0	0	0	0	0	0	0	0	0	0	0	0	0	0	0	0	0
RPS_02	2.23	3.44	3.91	14.18	2.37	3591.646973	7801.395	89.4591	1.4031	6.6399	0	0.2083	0.4665	0.9946	0	0.3448	0	0	0.4837	0	0	0	0	0	0	0	0	0	0	0	0	0	0	0	0	0	0	0	0	0	0	0	0	0	0	0	0	0	0
RPS_02	2.93	3.62	6.74	9.69	1.52	3680.253906	7786.75	72.5461	1.4612	15.3086	0.1007	0.8124	2.2724	4.6946	0	0	0	0.2681	1.2154	0	0	0	0	1.081	0.2396	0	0	0	0	0	0	0	0	0	0	0	0	0	0	0	0	0	0	0	0	0	0	0	0
RPS_02	1.4	2.05	1.55	4.77	2.12	3674.018066	7786.0975	89.3378	0.7912	2.7877	3.3334	0.1167	0	0	0	0	3.6331	0	0	0	0	0	0	0	0	0	0	0	0	0	0	0	0	0	0	0	0	0	0	0	0	0	0	0	0	0	0	0	0
RPS_02	1.41	1.97	1.57	5.21	1.94	3676.338379	7783.4875	89.1981	0.5552	2.4646	3.3591	0.2807	0	0	0	0.3362	3.8062	0	0	0	0	0	0	0	0	0	0	0	0	0	0	0	0	0	0	0	0	0	0	0	0	0	0	0	0	0	0	0	0
RPS_02	1.22	1.97	1.17	4.2	2.59	3670.682617	7783.27	92.9734	0.6162	2.7869	1.6836	0	0	0	0	0	1.94	0	0	0	0	0	0	0	0	0	0	0	0	0	0	0	0	0	0	0	0	0	0	0	0	0	0	0	0	0	0	0	0
RPS_02	7.36	8.33	42.58	26.48	1.28	3709.98291	7760.8675	51.0646	2.2584	30.8069	0	0.4643	5.2342	7.7582	0	0	0	0.416	0.3457	0	0	0	0.2008	1.2214	0.2295	0	0	0	0	0	0	0	0	0	0	0	0	0	0	0	0	0	0	0	0	0	0	0	0
RPS_02	4.16	4.79	13.61	14.47	1.33	3689.970215	7757.315	45.6102	1.9124	30.8739	0.128	5.04	3.6897	10.6487	0	0.197	0.268	0.5841	0.3055	0	0	0	0	0.7424	0	0	0	0	0	0	0	0	0	0	0	0	0	0	0	0	0	0	0	0	0	0	0	0	0
RPS_02	3.87	4.49	11.79	12.88	1.34	3626.886719	7749.485	59.0399	0	5.3126	16.5718	0.7694	0	0	0	0.9168	17.104	0	0.2855	0	0	0	0	0	0	0	0	0	0	0	0	0	0	0	0	0	0	0	0	0	0	0	0	0	0	0	0	0	0
RPS_02	4.8	6.82	18.11	17.22	2.02	3714.333496	7942.495	50.4016	1.5162	28.1246	0	0.4663	5.8577	11.499	0	0	0	1.0184	0	0	0	0	0	1.1161	0	0	0	0	0	0	0	0	0	0	0	0	0	0	0	0	0	0	0	0	0	0	0	0	0
RPS_02	4.24	4.66	14.09	13.31	1.21	3654.657959	7934.81	59.0217	0.5321	8.4487	14.0062	0.6913	0	0	0	2.1251	13.9994	0.2647	0.9108	0	0	0	0	0	0	0	0	0	0	0	0	0	0	0	0	0	0	0	0	0	0	0	0	0	0	0	0	0	0
RPS_02	2.92	3.62	6.68	9.98	1.54	3704.472168	7930.025	75.1641	0.5991	5.3907	8.1638	0.4967	0	0	0	1.4452	8.1379	0	0.6025	0	0	0	0	0	0	0	0	0	0	0	0	0	0	0	0	0	0	0	0	0	0	0	0	0	0	0	0	0	0
RPS_02	2.18	2.95	3.75	7.81	1.83	3700.70166	7925.82	79.2697	0.7276	3.8104	7.7402	0.2489	0	0	0	0.3856	7.8176	0	0	0	0	0	0	0	0	0	0	0	0	0	0	0	0	0	0	0	0	0	0	0	0	0	0	0	0	0	0	0	0
RPS_02	4.3	4.78	14.55	17.22	1.23	3583.960938	7922.485	63.9128	0.8315	9.9044	8.9878	1.0261	0.9976	2.8177	0	1.1087	8.9629	0.2139	0.3485	0	0	0	0	0.8881	0	0	0	0	0	0	0	0	0	0	0	0	0	0	0	0	0	0	0	0	0	0	0	0	0
RPS_02	2.29	3.63	4.1	10.13	2.52	3580.19043	7917.845	85.2953	1.0377	3.1681	4.9461	0.1366	0	0	0	0.1835	5.2326	0	0	0	0	0	0	0	0	0	0	0	0	0	0	0	0	0	0	0	0	0	0	0	0	0	0	0	0	0	0	0	0
RPS_02	7.02	8.63	38.67	28.21	1.51	3716.798828	7900.3725	51.2475	0	5.3129	20.8726	0.7434	0	0	0	1.1184	20.7051	0	0	0	0	0	0	0	0	0	0	0	0	0	0	0	0	0	0	0	0	0	0	0	0	0	0	0	0	0	0	0	0
RPS_02	2.14	3.02	3.6	8.97	1.99	3580.480469	7897.0375	85.0012	0.8303	2.8861	5.4055	0.1353	0	0	0	0	5.7415	0	0	0	0	0	0	0	0	0	0	0	0	0	0	0	0	0	0	0	0	0	0	0	0	0	0	0	0	0	0	0	0
RPS_02	3.65	4.35	10.47	12.59	1.42	3681.124023	7886.96	60.3505	0	5.1646	16.0756	0.5522	0	0	0	1.4247	15.9258	0	0.5066	0	0	0	0	0	0	0	0	0	0	0	0	0	0	0	0	0	0	0	0	0	0	0	0	0	0	0	0	0	0
RPS_02	1.69	1.97	2.24	5.35	1.36	3702.151855	7876.375	89.8304	0.9992	3.552	2.5959	0	0	0	0	0.2016	2.8209	0	0	0	0	0	0	0	0	0	0	0	0	0	0	0	0	0	0	0	0	0	0	0	0	0	0	0	0	0	0	0	0
RPS_02	2.11	3.12	3.5	8.54	2.18	3721.294434	7869.995	91.3869	0.8729	3.8161	1.517	0.1461	0.1681	0.3344	0	0.2608	1.4977	0	0	0	0	0	0	0	0	0	0	0	0	0	0	0	0	0	0	0	0	0	0	0	0	0	0	0	0	0	0	0	0
RPS_02	2.66	5.17	5.55	14.32	3.78	3641.243652	7866.225	87.8179	0.8674	3.5118	3.6167	0.2134	0	0	0	0.2507	3.7222	0	0	0	0	0	0	0	0	0	0	0	0	0	0	0	0	0	0	0	0	0	0	0	0	0	0	0	0	0	0	0	0
RPS_02	2.77	3.64	6.01	10.13	1.73	3623.26123	7864.63	68.3455	0.6796	5.4836	10.8509	0.5465	0	0	0	1.3362	11.1576	0.1879	0.7482	0	0	0.1848	0	0.254	0.2252	0	0	0	0	0	0	0	0	0	0	0	0	0	0	0	0	0	0	0	0	0	0	0	0
RPS_02	1.28	1.75	1.28	3.91	1.88	3637.328125	7862.3825	91.9433	0.8418	3.1281	2.0174	0	0	0	0	0	2.0694	0	0	0	0	0	0	0	0	0	0	0	0	0	0	0	0	0	0	0	0	0	0	0	0	0	0	0	0	0	0	0	0
RPS_02	2.16	2.78	3.66	6.95	1.66	3600.783203	7852.885	81.741	1.2267	9.838	0	0	0.5143	0.9951	0	0	0	0	5.427	0	0	0	0	0.258	0	0	0	0	0	0	0	0	0	0	0	0	0	0	0	0	0	0	0	0	0	0	0	0	0
RPS_02	1.81	2.69	2.57	6.66	2.21	3642.548828	7852.885	91.1391	0.8132	4.178	1.1423	0.3588	0	0	0	1.2653	0.7476	0	0.3557	0	0	0	0	0	0	0	0	0	0	0	0	0	0	0	0	0	0	0	0	0	0	0	0	0	0	0	0	0	0
RPS_02	2.03	2.46	3.24	6.95	1.47	3795.334473	7962.65	85.1913	0.8634	3.5984	4.6753	0.2546	0	0	0	0.453	4.9641	0	0	0	0	0	0	0	0	0	0	0	0	0	0	0	0	0	0	0	0	0	0	0	0	0	0	0	0	0	0	0	0
RPS_02	3.13	3.55	7.7	10.56	1.28	3787.938477	7953.515	67.8121	1.6642	18.4068	0	1.5217	3.1665	6.444	0	0	0	0.3475	0	0	0	0	0	0.6371	0	0	0	0	0	0	0	0	0	0	0	0	0	0	0	0	0	0	0	0	0	0	0	0	0
RPS_02	4.59	5.98	16.56	21.7	1.69	3819.625244	7949.6725	50.8969	1.7072	28.3609	0.8797	0	0.766	15.9112	0	0.3971	0.8617	0	0.2194	0	0	0	0	0	0	0	0	0	0	0	0	0	0	0	0	0	0	0	0	0	0	0	0	0	0	0	0	0	0
RPS_02	2.12	2.93	3.52	7.67	1.92	3769.230957	7950.325	86.9478	1.1194	3.498	3.9547	0.1709	0	0	0	0.1687	4.1407	0	0	0	0	0	0	0	0	0	0	0	0	0	0	0	0	0	0	0	0	0	0	0	0	0	0	0	0	0	0	0	0
RPS_02	1.35	2.2	1.42	4.77	2.68	3765.750488	7949.2375	85.3495	0.6707	7.7542	1.1538	0.7276	0	0	0	2.6885	0.2377	0.1838	1.2341	0	0	0	0	0	0	0	0	0	0	0	0	0	0	0	0	0	0	0	0	0	0	0	0	0	0	0	0	0	0
RPS_02	5.98	7.3	28.09	26.48	1.49	3840.290527	7932.8525	54.1936	1.9584	27.3016	0.1333	0.7983	4.9102	9.0265	0	0	0	0.2323	0.3733	0	0	0	0	1.0726	0	0	0	0	0	0	0	0	0	0	0	0	0	0	0	0	0	0	0	0	0	0	0	0	0
RPS_02	1.95	2.56	2.97	6.37	1.74	3808.241211	7933.505	87.4595	0.8415	4.1061	3.4325	0.2602	0	0	0	0.4353	3.465	0	0	0	0	0	0	0	0	0	0	0	0	0	0	0	0	0	0	0	0	0	0	0	0	0	0	0	0	0	0	0	0
RPS_02	2.93	4.08	6.76	14.03	1.94	3832.604492	7930.315	77.2287	1.1954	13.4012	0	0.3038	0.3118	1.1182	0	0.1741	0	0	6.2668	0	0	0	0	0	0	0	0	0	0	0	0	0	0	0	0	0	0	0	0	0	0	0	0	0	0	0	0	0	0
RPS_02	2.47	3.44	4.79	8.97	1.94	3860.738281	7929.3	83.8953	1.1832	6.3374	2.91	0.4706	0	0	0	1.5329	2.9991	0	0.6716	0	0	0	0	0	0	0	0	0	0	0	0	0	0	0	0	0	0	0	0	0	0	0	0	0	0	0	0	0	0
RPS_02	2.5	3.12	4.9	8.25	1.56	3731.960938	7924.08	79.0743	1.3818	11.987	0	0.1164	3.1806	3.4043	0	0	0	0.186	0	0	0	0	0	0.6696	0	0	0	0	0	0	0	0	0	0	0	0	0	0	0	0	0	0	0	0	0	0	0	0	0
RPS_02	1.59	1.76	1.99	5.21	1.22	3790.693848	7912.8425	89.6751	0.9635	5.3696	1.6599	0.3475	0	0	0	0.7154	1.269	0	0	0	0	0	0	0	0	0	0	0	0	0	0	0	0	0	0	0	0	0	0	0	0	0	0	0	0	0	0	0	0
RPS_02	2.84	3.48	6.32	9.84	1.51	3794.464355	7911.465	85.2944	1.08	4.0681	3.8895	0.2117	0	0	0	0.9256	4.0083	0	0.5223	0	0	0	0	0	0	0	0	0	0	0	0	0	0	0	0	0	0	0	0	0	0	0	0	0	0	0	0	0	0
RPS_02	1.82	1.97	2.6	5.79	1.17	3738.486816	7904.94	88.7681	1.1277	3.857	2.8788	0.1687	0	0	0	0.2047	2.9951	0	0	0	0	0	0	0	0	0	0	0	0	0	0	0	0	0	0	0	0	0	0	0	0	0	0	0	0	0	0	0	0
RPS_02	7.4	8.37	42.98	25.75	1.28	3806.210938	7895.4425	44.6236	1.8142	32.8077	0.2085	0.622	5.2928	10.2146	0	0	0	0.3917	1.1556	0.3031	0	0	0.2462	2.0799	0.2401	0	0	0	0	0	0	0	0	0	0	0	0	0	0	0	0	0	0	0	0	0	0	0	0
RPS_02	3.9	4.35	11.93	13.6	1.25	3851.74707	7894.645	66.9362	0	5.1722	12.3099	0.4165	0	0	0	1.5368	12.0451	0.2503	0.8392	0	0	0	0	0.2104	0.2833	0	0	0	0	0	0	0	0	0	0	0	0	0	0	0	0	0	0	0	0	0	0	0	0
RPS_02	5.77	6.98	26.13	23.15	1.47	3859.868164	7878.9125	61.2995	0.5803	7.7634	12.6675	1.3595	0	0	0	1.9302	12.964	0.2587	0.7738	0	0	0	0.1953	0.2077	0	0	0	0	0	0	0	0	0	0	0	0	0	0	0	0	0	0	0	0	0	0	0	0	0
RPS_02	2.73	3.3	5.84	9.26	1.47	3760.529785	7878.985	73.7927	0.5918	4.9379	9.2004	0.7289	0	0	0	1.1607	9.2747	0	0.3129	0	0	0	0	0	0	0	0	0	0	0	0	0	0	0	0	0	0	0	0	0	0	0	0	0	0	0	0	0	0
RPS_02	1.99	2.18	3.12	6.51	1.19	3727.465332	7875.36	88.049	1.0744	3.7598	3.362	0.136	0	0	0	0.2279	3.3909	0	0	0	0	0	0	0	0	0	0	0	0	0	0	0	0	0	0	0	0	0	0	0	0	0	0	0	0	0	0	0	0
RPS_02	1.75	2.66	2.41	6.22	2.3	3856.097656	7874.925	88.9583	0.5935	3.5263	3.1936	0.1151	0	0	0	0.1528	3.4604	0	0	0	0	0	0	0	0	0	0	0	0	0	0	0	0	0	0	0	0	0	0	0	0	0	0	0	0	0	0	0	0
RPS_02	1.36	1.56	1.44	4.2	1.32	3854.502441	7867.4575	91.6828	0.7906	3.0075	2.0872	0	0	0	0	0	2.4319	0	0	0	0	0	0	0	0	0	0	0	0	0	0	0	0	0	0	0	0	0	0	0	0	0	0	0	0	0	0	0	0
RPS_02	2.16	2.7	3.66	7.09	1.57	3758.064453	7856.365	80.04	1.6079	11.873	0	0.1062	0.2397	0.3079	0	0	0	0	0	0	0	0	0	5.8253	0	0	0	0	0	0	0	0	0	0	0	0	0	0	0	0	0	0	0	0	0	0	0	0	0
RPS_02	3.09	3.83	7.49	9.98	1.54	3926.222168	7961.49	69.4345	0.6446	6.8244	9.7609	0.5899	0	0	0	1.9364	10.1521	0	0.6573	0	0	0	0	0	0	0	0	0	0	0	0	0	0	0	0	0	0	0	0	0	0	0	0	0	0	0	0	0	0
RPS_02	3.51	6.84	9.65	17.36	3.81	3943.044434	7957.7925	80.1659	0	2.6496	8.323	0	0	0	0	0	8.8615	0	0	0	0	0	0	0	0	0	0	0	0	0	0	0	0	0	0	0	0	0	0	0	0	0	0	0	0	0	0	0	0
RPS_02	3.59	7.3	10.11	14.47	4.14	3950.150391	7953.2975	90.7421	1.7759	3.8929	1.809	0	0	0	0	0	1.7801	0	0	0	0	0	0	0	0	0	0	0	0	0	0	0	0	0	0	0	0	0	0	0	0	0	0	0	0	0	0	0	0
RPS_02	4.37	5.24	14.97	19.1	1.44	3960.011719	7954.53	76.7701	1.055	7.3798	5.9591	0.5929	0	0	0	1.9289	5.2892	0.2212	0.8038	0	0	0	0	0	0	0	0	0	0	0	0	0	0	0	0	0	0	0	0	0	0	0	0	0	0	0	0	0	0
RPS_02	4.07	6.35	13	25.75	2.43	3939.854004	7952.5725	61.2425	0.6114	9.0291	13.1759	0.8107	0	0	0	2.0419	12.6201	0	0.4684	0	0	0	0	0	0	0	0	0	0	0	0	0	0	0	0	0	0	0	0	0	0	0	0	0	0	0	0	0	0
RPS_02	1.94	2.5	2.95	6.37	1.66	3942.681885	7950.76	90.0524	1.0604	2.6387	2.9933	0	0	0	0	0	3.2552	0	0	0	0	0	0	0	0	0	0	0	0	0	0	0	0	0	0	0	0	0	0	0	0	0	0	0	0	0	0	0	0
RPS_02	1.81	2.32	2.57	6.22	1.64	3946.814941	7949.31	90.761	0.804	2.8214	2.6852	0	0	0	0	0	2.9284	0	0	0	0	0	0	0	0	0	0	0	0	0	0	0	0	0	0	0	0	0	0	0	0	0	0	0	0	0	0	0	0
RPS_02	1.8	3.66	2.55	8.54	4.12	3961.461914	7947.28	92.7848	1.2134	3.1341	1.3763	0	0	0	0	0	1.4914	0	0	0	0	0	0	0	0	0	0	0	0	0	0	0	0	0	0	0	0	0	0	0	0	0	0	0	0	0	0	0	0
RPS_02	4.69	5.62	17.25	15.63	1.44	3901.278809	7943.22	59.2704	1.6965	23.3055	0.1008	1.3336	3.9175	8.5241	0	0	0	0.5068	0.3024	0	0	0	0	1.0424	0	0	0	0	0	0	0	0	0	0	0	0	0	0	0	0	0	0	0	0	0	0	0	0	0
RPS_02	3.26	4.18	8.35	11	1.64	3978.13916	7924.37	76.2958	0.6557	5.2433	7.8862	0.376	0	0	0	0.8969	8.3633	0	0.2828	0	0	0	0	0	0	0	0	0	0	0	0	0	0	0	0	0	0	0	0	0	0	0	0	0	0	0	0	0	0
RPS_02	2.89	3.72	6.55	10.42	1.66	3971.90332	7920.165	68.5127	0	3.2595	13.3833	0.3233	0	0	0	0.3727	14.1485	0	0	0	0	0	0	0	0	0	0	0	0	0	0	0	0	0	0	0	0	0	0	0	0	0	0	0	0	0	0	0	0
RPS_02	4.2	4.76	13.88	14.03	1.28	3887.791992	7913.93	63.3191	1.8685	21.0196	0.1057	0.3664	5.144	6.5331	0	0	0	0.986	0	0	0	0	0	0.6576	0	0	0	0	0	0	0	0	0	0	0	0	0	0	0	0	0	0	0	0	0	0	0	0	0
RPS_02	2.82	3.2	6.26	9.4	1.29	3997.426758	7903.635	78.7725	1.0844	6.1485	5.78	0.8349	0	0	0	0.7978	6.2354	0	0.3465	0	0	0	0	0	0	0	0	0	0	0	0	0	0	0	0	0	0	0	0	0	0	0	0	0	0	0	0	0	0
RPS_02	1.76	2.46	2.43	5.79	1.96	4019.179688	7897.11	89.3923	0.8203	2.8988	3.3947	0	0	0	0	0	3.4939	0	0	0	0	0	0	0	0	0	0	0	0	0	0	0	0	0	0	0	0	0	0	0	0	0	0	0	0	0	0	0	0
RPS_02	1.39	1.51	1.53	4.2	1.17	3995.686523	7871.5175	91.6289	0.9184	3.4294	1.8442	0	0	0	0	0.176	2.003	0	0	0	0	0	0	0	0	0	0	0	0	0	0	0	0	0	0	0	0	0	0	0	0	0	0	0	0	0	0	0	0
RPS_02	1.95	2.15	2.97	6.08	1.22	3953.48584	7863.76	81.3903	0.6519	5.053	5.6955	0.3314	0	0	0	0.5539	6.1076	0	0.2165	0	0	0	0	0	0	0	0	0	0	0	0	0	0	0	0	0	0	0	0	0	0	0	0	0	0	0	0	0	0
RPS_02	3.4	3.79	9.09	11.58	1.24	3913.025391	7861.295	64.7773	0	4.1498	13.8398	0.7805	0	0	0	1.1327	15.1208	0	0.1991	0	0	0	0	0	0	0	0	0	0	0	0	0	0	0	0	0	0	0	0	0	0	0	0	0	0	0	0	0	0
RPS_02	1.61	1.97	2.03	5.06	1.5	3955.806152	7852.885	89.4624	0.9909	4.599	2.4645	0.1937	0	0	0	0	2.2894	0	0	0	0	0	0	0	0	0	0	0	0	0	0	0	0	0	0	0	0	0	0	0	0	0	0	0	0	0	0	0	0
RPS_02	1.57	1.88	1.95	4.92	1.43	4069.581543	7949.2375	89.7888	0.9647	3.4856	2.6294	0.1192	0	0	0	0.1805	2.8318	0	0	0	0	0	0	0	0	0	0	0	0	0	0	0	0	0	0	0	0	0	0	0	0	0	0	0	0	0	0	0	0
RPS_02	3.35	3.72	8.79	10.85	1.24	4057.399902	7936.26	58.9055	1.198	19.2883	2.9978	0	1.5042	12.7023	0	0.1686	2.8281	0	0	0	0	0	0	0.4073	0	0	0	0	0	0	0	0	0	0	0	0	0	0	0	0	0	0	0	0	0	0	0	0	0
RPS_02	1.66	1.93	2.18	5.35	1.34	4158.478516	7921.6875	82.5878	0.55	5.0744	4.7541	0.7815	0	0	0	0.7883	5.1185	0	0.3455	0	0	0	0	0	0	0	0	0	0	0	0	0	0	0	0	0	0	0	0	0	0	0	0	0	0	0	0	0	0
RPS_02	1.84	2.21	2.66	5.79	1.44	4026.220703	7907.55	90.1437	0.9324	3.8026	2.6435	0	0	0	0	0	2.4778	0	0	0	0	0	0	0	0	0	0	0	0	0	0	0	0	0	0	0	0	0	0	0	0	0	0	0	0	0	0	0	0
RPS_02	2.44	4.54	4.67	10.71	3.47	4024.625488	7904.215	91.4688	1.2182	2.6467	2.303	0	0	0	0	0	2.3633	0	0	0	0	0	0	0	0	0	0	0	0	0	0	0	0	0	0	0	0	0	0	0	0	0	0	0	0	0	0	0	0
RPS_02	5.84	6.53	26.75	22.57	1.25	4084.518555	7886.0175	48.0322	1.8296	29.9787	0	0.5768	7.3474	9.6426	0	0	0	0.679	0	0	0	0	0	1.9138	0	0	0	0	0	0	0	0	0	0	0	0	0	0	0	0	0	0	0	0	0	0	0	0	0
RPS_02	3.46	4.57	9.42	15.63	1.74	4126.719238	7886.09	69.8536	0.6239	4.347	11.6708	0.517	0	0	0	0.5661	12.0539	0.162	0.2057	0	0	0	0	0	0	0	0	0	0	0	0	0	0	0	0	0	0	0	0	0	0	0	0	0	0	0	0	0	0
RPS_02	4.2	5.37	13.84	20.55	1.64	4056.674805	7881.885	66.2875	0.595	4.764	13.2934	0.5179	0	0	0	0.3601	14.0061	0	0.176	0	0	0	0	0	0	0	0	0	0	0	0	0	0	0	0	0	0	0	0	0	0	0	0	0	0	0	0	0	0
RPS_02	1.62	2.07	2.07	5.5	1.63	4066.826172	7881.3775	93.0323	1.1692	3.8674	0.8012	0.1387	0	0	0	0.1978	0.7933	0	0	0	0	0	0	0	0	0	0	0	0	0	0	0	0	0	0	0	0	0	0	0	0	0	0	0	0	0	0	0	0
RPS_02	3.45	3.89	9.34	11	1.27	4091.914551	7879.855	72.9117	0.7762	5.7917	9.1619	0.7789	0	0	0	0.7376	9.5668	0	0.2752	0	0	0	0	0	0	0	0	0	0	0	0	0	0	0	0	0	0	0	0	0	0	0	0	0	0	0	0	0	0
RPS_02	2.74	3.25	5.88	9.26	1.41	4120.918457	7875.65	75.025	0.5918	3.9793	9.717	0.2614	0	0	0	0.3453	10.0802	0	0	0	0	0	0	0	0	0	0	0	0	0	0	0	0	0	0	0	0	0	0	0	0	0	0	0	0	0	0	0	0
RPS_02	2.69	3.44	5.67	9.69	1.64	4069.146484	7874.055	75.8031	1.175	13.6865	0	0.429	1.2495	5.419	0	0	0.2098	0.2006	1.1193	0	0	0	0	0.7082	0	0	0	0	0	0	0	0	0	0	0	0	0	0	0	0	0	0	0	0	0	0	0	0	0
RPS_02	2.51	2.98	4.96	8.25	1.41	4063.490723	7873.04	80.7612	0.8678	3.4601	7.1312	0.182	0	0	0	0.1521	7.4455	0	0	0	0	0	0	0	0	0	0	0	0	0	0	0	0	0	0	0	0	0	0	0	0	0	0	0	0	0	0	0	0
RPS_02	2.26	2.7	4	7.38	1.44	4127.299316	7867.965	86.4979	1.0416	4.4457	3.5806	0.3176	0	0	0	0.1525	3.9641	0	0	0	0	0	0	0	0	0	0	0	0	0	0	0	0	0	0	0	0	0	0	0	0	0	0	0	0	0	0	0	0
RPS_02	3.42	4.01	9.21	11.58	1.37	4080.022949	7864.92	75.8928	1.8944	15.2158	0	0.3204	2.6099	3.3444	0	0	0	0	0	0	0	0	0	0.7224	0	0	0	0	0	0	0	0	0	0	0	0	0	0	0	0	0	0	0	0	0	0	0	0	0
RPS_02	2.56	3.05	5.15	8.83	1.42	4299.372559	7962.1425	81.0179	0.9872	3.6682	6.8458	0.1515	0	0	0	0.2343	7.095	0	0	0	0	0	0	0	0	0	0	0	0	0	0	0	0	0	0	0	0	0	0	0	0	0	0	0	0	0	0	0	0
RPS_02	1.99	2.25	3.12	6.51	1.27	4171.755371	7956.85	80.7398	0.812	6.56	4.9755	0.751	0	0	0	0.7899	4.7804	0	0.3355	0	0	0	0	0	0.2559	0	0	0	0	0	0	0	0	0	0	0	0	0	0	0	0	0	0	0	0	0	0	0	0
RPS_02	2.37	2.97	4.4	8.97	1.57	4180.021484	7953.515	84.8147	0.9575	4.9614	4.4157	0.2243	0	0	0	0.1543	4.4721	0	0	0	0	0	0	0	0	0	0	0	0	0	0	0	0	0	0	0	0	0	0	0	0	0	0	0	0	0	0	0	0
RPS_02	1.8	2.05	2.55	6.08	1.29	4193.943359	7933.94	87.7921	1.1177	3.5621	3.4011	0.1534	0	0	0	0.2102	3.7635	0	0	0	0	0	0	0	0	0	0	0	0	0	0	0	0	0	0	0	0	0	0	0	0	0	0	0	0	0	0	0	0
RPS_02	1.46	2.19	1.67	5.5	2.25	4209.460449	7930.9675	89.14	0.7455	6.2043	0.6727	0.8538	0	0	0	0.9935	0.7979	0.2197	0.3727	0	0	0	0	0	0	0	0	0	0	0	0	0	0	0	0	0	0	0	0	0	0	0	0	0	0	0	0	0	0
RPS_02	3.24	3.76	8.25	11	1.35	4210.185547	7928.72	68.047	0.5268	4.4092	12.4465	0.5865	0	0	0	0.6072	13.1383	0	0.2384	0	0	0	0	0	0	0	0	0	0	0	0	0	0	0	0	0	0	0	0	0	0	0	0	0	0	0	0	0	0
RPS_02	6.03	8.78	28.53	29.23	2.12	4220.336914	7922.7025	62.2312	1.9042	23.9982	0.1113	0.5798	3.9176	6.2062	0	0	0	0	0.1617	0	0	0	0	0.8899	0	0	0	0	0	0	0	0	0	0	0	0	0	0	0	0	0	0	0	0	0	0	0	0	0
RPS_02	1.85	2.07	2.7	6.22	1.25	4293.426758	7923.355	88.8276	1.0948	3.4759	3.1492	0	0	0	0	0.1615	3.2909	0	0	0	0	0	0	0	0	0	0	0	0	0	0	0	0	0	0	0	0	0	0	0	0	0	0	0	0	0	0	0	0
RPS_02	1.51	1.69	1.78	4.49	1.26	4197.713867	7923.2825	91.8673	0.8298	3.1065	2.0026	0	0	0	0	0	2.1937	0	0	0	0	0	0	0	0	0	0	0	0	0	0	0	0	0	0	0	0	0	0	0	0	0	0	0	0	0	0	0	0
RPS_02	2.05	3.24	3.29	10.13	2.5	4198.583984	7913.64	90.6691	0.7949	4.3181	1.4338	0.3119	0	0.1175	0	0.4863	1.6563	0	0.2121	0	0	0	0	0	0	0	0	0	0	0	0	0	0	0	0	0	0	0	0	0	0	0	0	0	0	0	0	0	0
RPS_02	3.42	4.08	9.17	11.58	1.43	4254.416504	7908.275	69.6051	0	6.4377	10.0424	0.9008	0	0	0	1.2869	10.5095	0.2385	0.7575	0	0	0	0	0	0.2216	0	0	0	0	0	0	0	0	0	0	0	0	0	0	0	0	0	0	0	0	0	0	0	0
RPS_02	2.16	2.43	3.66	6.66	1.26	4187.5625	7908.71	80.7849	0.9047	3.2706	7.1116	0.1355	0	0	0	0.2236	7.5691	0	0	0	0	0	0	0	0	0	0	0	0	0	0	0	0	0	0	0	0	0	0	0	0	0	0	0	0	0	0	0	0
RPS_02	2.33	2.79	4.27	7.38	1.44	4196.84375	7903.345	89.3588	1.0634	3.7499	2.7424	0.1195	0	0	0	0.1623	2.8037	0	0	0	0	0	0	0	0	0	0	0	0	0	0	0	0	0	0	0	0	0	0	0	0	0	0	0	0	0	0	0	0
RPS_02	2.55	3.17	5.09	8.97	1.55	4179.731445	7899.575	72.469	0.6554	5.1098	9.1176	0.6298	0	0.1573	0	1.1333	9.8477	0.1982	0.682	0	0	0	0	0	0	0	0	0	0	0	0	0	0	0	0	0	0	0	0	0	0	0	0	0	0	0	0	0	0
RPS_02	1.62	1.93	2.07	5.35	1.41	4171.755371	7895.37	85.0123	0.7714	4.1346	4.5994	0.302	0	0	0	0.379	4.8012	0	0	0	0	0	0	0	0	0	0	0	0	0	0	0	0	0	0	0	0	0	0	0	0	0	0	0	0	0	0	0	0
RPS_02	2.05	2.66	3.29	6.95	1.69	4194.813477	7891.31	88.2862	1.0445	3.0303	3.5055	0.1421	0	0	0	0.1347	3.8566	0	0	0	0	0	0	0	0	0	0	0	0	0	0	0	0	0	0	0	0	0	0	0	0	0	0	0	0	0	0	0	0
RPS_02	2.93	3.52	6.74	11	1.45	4206.705078	7889.28	84.6288	1.2135	6.9325	2.224	0.6264	0	0	0	1.1133	2.5433	0	0.7182	0	0	0	0	0	0	0	0	0	0	0	0	0	0	0	0	0	0	0	0	0	0	0	0	0	0	0	0	0	0
RPS_02	2.87	3.8	6.47	10.13	1.75	4310.974121	7888.99	68.7617	0.5939	5.3067	11.6217	1.0443	0	0	0	0.5587	12.113	0	0	0	0	0	0	0	0	0	0	0	0	0	0	0	0	0	0	0	0	0	0	0	0	0	0	0	0	0	0	0	0
RPS_02	2.25	2.61	3.98	7.38	1.34	4286.175781	7886.525	75.356	0.6463	5.2809	8.5136	0.6342	0	0	0	0.5285	9.0406	0	0	0	0	0	0	0	0	0	0	0	0	0	0	0	0	0	0	0	0	0	0	0	0	0	0	0	0	0	0	0	0
RPS_02	2.31	2.75	4.19	7.81	1.42	4191.768066	7885.365	80.9854	0.7569	5.8443	5.6022	0.6041	0	0	0	0.259	5.9481	0	0	0	0	0	0	0	0	0	0	0	0	0	0	0	0	0	0	0	0	0	0	0	0	0	0	0	0	0	0	0	0
RPS_02	2.18	2.61	3.73	8.1	1.43	4197.858887	7860.28	85.0708	0.6122	4.745	3.7891	0.54	0	0	0	0.7606	4.2028	0	0.2795	0	0	0	0	0	0	0	0	0	0	0	0	0	0	0	0	0	0	0	0	0	0	0	0	0	0	0	0	0	0
RPS_02	2.29	2.78	4.1	7.81	1.48	4191.042969	7856.22	82.3818	0.7586	4.5117	5.0115	0.7784	0	0.1118	0	0.694	5.3857	0	0.3666	0	0	0	0	0	0	0	0	0	0	0	0	0	0	0	0	0	0	0	0	0	0	0	0	0	0	0	0	0	0
RPS_02	2.08	2.46	3.41	6.95	1.39	4216.276367	7854.335	91.3146	1.2891	3.5852	1.7309	0.1509	0	0	0	0.2215	1.708	0	0	0	0	0	0	0	0	0	0	0	0	0	0	0	0	0	0	0	0	0	0	0	0	0	0	0	0	0	0	0	0
RPS_02	2.99	3.52	7.03	9.69	1.39	4353.544922	7962.4325	70.6885	0	2.4703	13.0966	0.1473	0	0	0	0	13.5972	0	0	0	0	0	0	0	0	0	0	0	0	0	0	0	0	0	0	0	0	0	0	0	0	0	0	0	0	0	0	0	0
RPS_02	4.24	5.91	14.09	18.52	1.95	4359.635742	7955.98	70.1058	0.9625	9.9387	5.3748	0.8466	0.1815	0.854	0	2.006	5.3982	0.2213	3.6128	0	0	0	0	0.2774	0.2203	0	0	0	0	0	0	0	0	0	0	0	0	0	0	0	0	0	0	0	0	0	0	0	0
RPS_02	2.31	2.7	4.21	7.81	1.36	4430.622803	7954.385	81.0948	0.9424	3.9584	6.6927	0.1669	0	0	0	0.2746	6.8702	0	0	0	0	0	0	0	0	0	0	0	0	0	0	0	0	0	0	0	0	0	0	0	0	0	0	0	0	0	0	0	0
RPS_02	3.83	5.5	11.49	18.66	2.07	4397.195801	7941.625	66.9107	0.7975	8.6967	9.9719	1.7575	0	0	0	1.0266	10.6144	0	0.2247	0	0	0	0	0	0	0	0	0	0	0	0	0	0	0	0	0	0	0	0	0	0	0	0	0	0	0	0	0	0
RPS_02	1.81	2.37	2.57	6.08	1.72	4359.780762	7919.005	88.3709	0.5826	4.3634	2.7845	0.4602	0	0	0	0.4253	3.0132	0	0	0	0	0	0	0	0	0	0	0	0	0	0	0	0	0	0	0	0	0	0	0	0	0	0	0	0	0	0	0	0
RPS_02	4.52	5.42	16.04	15.34	1.44	4346.003906	7909.87	56.3992	1.4099	24.71	1.754	0.8437	5.4146	6.8433	0	0.1334	1.7077	0.1969	0	0	0	0	0	0.5873	0	0	0	0	0	0	0	0	0	0	0	0	0	0	0	0	0	0	0	0	0	0	0	0	0
RPS_02	2.53	4.6	5.05	18.81	3.29	4333.387207	7910.015	88.2647	1.2391	6.3641	1.2297	0.3609	0	0	0	0.9618	0.9974	0	0.5824	0	0	0	0	0	0	0	0	0	0	0	0	0	0	0	0	0	0	0	0	0	0	0	0	0	0	0	0	0	0
RPS_02	2.13	3.18	3.56	7.38	2.23	4452.593262	7910.16	87.6643	1.1011	3.6279	3.7603	0.1302	0	0	0	0	3.7162	0	0	0	0	0	0	0	0	0	0	0	0	0	0	0	0	0	0	0	0	0	0	0	0	0	0	0	0	0	0	0	0
RPS_02	1.85	2.09	2.68	5.79	1.28	4448.967773	7910.015	85.3005	0.6956	3.6055	4.9776	0.2055	0	0	0	0	5.2155	0	0	0	0	0	0	0	0	0	0	0	0	0	0	0	0	0	0	0	0	0	0	0	0	0	0	0	0	0	0	0	0
RPS_02	2.59	3.44	5.28	9.26	1.76	4458.249023	7909.6525	81.4632	0.6939	7.175	3.1826	1.4596	0	0	0	1.4942	3.6985	0.1544	0.6787	0	0	0	0	0	0	0	0	0	0	0	0	0	0	0	0	0	0	0	0	0	0	0	0	0	0	0	0	0	0
RPS_02	5.48	6.19	23.55	18.38	1.28	4398.645996	7904.65	51.238	0	4.3378	20.3334	0.9761	0	0	0	0.7648	21.7082	0.1855	0.2289	0	0	0	0	0	0.2273	0	0	0	0	0	0	0	0	0	0	0	0	0	0	0	0	0	0	0	0	0	0	0	0
RPS_02	3.37	4.57	8.94	11	1.83	4334.837402	7890.15	72.5063	1.0857	4.5224	10.5905	0.3971	0	0	0	0.503	10.3951	0	0	0	0	0	0	0	0	0	0	0	0	0	0	0	0	0	0	0	0	0	0	0	0	0	0	0	0	0	0	0	0
RPS_02	3.15	3.75	7.81	10.42	1.42	4343.103516	7889.425	87.986	1.3759	3.3665	3.5876	0	0	0	0	0	3.684	0	0	0	0	0	0	0	0	0	0	0	0	0	0	0	0	0	0	0	0	0	0	0	0	0	0	0	0	0	0	0	0
RPS_02	1.59	2.47	1.99	8.54	2.41	4428.52002	7887.54	91.0312	0.7272	3.9318	2.2403	0	0	0	0	0	2.0695	0	0	0	0	0	0	0	0	0	0	0	0	0	0	0	0	0	0	0	0	0	0	0	0	0	0	0	0	0	0	0	0
RPS_02	5.41	6.22	23.01	19.24	1.32	4437.65625	7883.9875	54.6509	1.7842	25.0605	2.2247	2.5648	3.1658	5.8621	0	0.4219	1.9967	0.1764	0.3806	0	0	0	0	1.7115	0	0	0	0	0	0	0	0	0	0	0	0	0	0	0	0	0	0	0	0	0	0	0	0	0
RPS_02	1.38	1.97	1.49	4.2	2.05	4430.260254	7883.1175	88.3302	0.7943	4.0045	3.3933	0.1544	0	0	0	0	3.3233	0	0	0	0	0	0	0	0	0	0	0	0	0	0	0	0	0	0	0	0	0	0	0	0	0	0	0	0	0	0	0	0
RPS_02	1.65	2.01	2.14	5.35	1.49	4380.808594	7874.2725	86.5535	0.7635	3.4199	4.422	0.1236	0	0	0	0	4.7175	0	0	0	0	0	0	0	0	0	0	0	0	0	0	0	0	0	0	0	0	0	0	0	0	0	0	0	0	0	0	0	0
RPS_02	1.23	1.62	1.19	4.05	1.72	4384.724121	7863.6875	91.0979	0.6223	3.8133	1.9465	0.2891	0	0	0	0.3083	1.9227	0	0	0	0	0	0	0	0	0	0	0	0	0	0	0	0	0	0	0	0	0	0	0	0	0	0	0	0	0	0	0	0
RPS_02	2.27	3.11	4.06	8.54	1.87	4542.005371	7965.115	86.7993	0.9088	3.2439	4.3005	0.1161	0	0	0	0.1353	4.4962	0	0	0	0	0	0	0	0	0	0	0	0	0	0	0	0	0	0	0	0	0	0	0	0	0	0	0	0	0	0	0	0
RPS_02	2.07	3.26	3.35	7.38	2.5	4538.959961	7961.925	83.9403	0.6882	2.9901	5.7513	0.2052	0	0	0	0.1578	6.2671	0	0	0	0	0	0	0	0	0	0	0	0	0	0	0	0	0	0	0	0	0	0	0	0	0	0	0	0	0	0	0	0
RPS_02	2.42	3.63	4.61	8.97	2.24	4481.532227	7953.95	85.7104	0.9037	3.2207	4.7774	0.1296	0	0	0	0.1373	5.121	0	0	0	0	0	0	0	0	0	0	0	0	0	0	0	0	0	0	0	0	0	0	0	0	0	0	0	0	0	0	0	0
RPS_02	2.01	2.75	3.16	8.1	1.87	4478.196777	7949.31	78.2969	0.6581	6.8384	5.5372	0.6575	0	0	0	1.9606	5.0696	0.1559	0.6078	0	0	0	0	0	0.2179	0	0	0	0	0	0	0	0	0	0	0	0	0	0	0	0	0	0	0	0	0	0	0	0
RPS_02	3.44	4.21	9.29	12.44	1.5	4546.645996	7929.88	72.8163	1.0944	11.9613	0.127	0	0.1892	0.2855	0	6.9915	0	0	6.5348	0	0	0	0	0	0	0	0	0	0	0	0	0	0	0	0	0	0	0	0	0	0	0	0	0	0	0	0	0	0
RPS_02	4.46	5.52	15.6	15.48	1.53	4551.57666	7925.24	54.0444	1.195	22.3852	0.1054	0.7627	7.5613	9.6588	0	0	0	2.9701	0	0	0	0	0	1.0789	0.2382	0	0	0	0	0	0	0	0	0	0	0	0	0	0	0	0	0	0	0	0	0	0	0	0
RPS_02	1.39	1.62	1.51	4.49	1.36	4530.838867	7917.99	92.9616	0.8354	3.3545	1.04	0.1988	0	0	0	0.3848	1.0439	0	0.1809	0	0	0	0	0	0	0	0	0	0	0	0	0	0	0	0	0	0	0	0	0	0	0	0	0	0	0	0	0	0
RPS_02	3.07	3.71	7.41	11	1.46	4509.375977	7905.085	73.2752	0.7944	6.7823	7.6071	0.7838	0	0	0	1.7031	8.2398	0.1673	0.6471	0	0	0	0	0	0	0	0	0	0	0	0	0	0	0	0	0	0	0	0	0	0	0	0	0	0	0	0	0	0
RPS_02	5.54	7.6	24.14	22.72	1.88	4589.861816	7869.1975	55.0582	0.8751	18.5169	4.5964	2.4053	3.5537	7.0511	0	0.3368	4.4102	1.0243	0	0.332	0	0	0	1.8399	0	0	0	0	0	0	0	0	0	0	0	0	0	0	0	0	0	0	0	0	0	0	0	0	0
RPS_02	3.47	5	9.46	12.59	2.07	4524.748047	7865.21	68.3493	0.6153	5.4161	11.4013	0.5463	0	0	0	1.0112	11.6862	0.1689	0.4804	0	0	0	0	0	0.325	0	0	0	0	0	0	0	0	0	0	0	0	0	0	0	0	0	0	0	0	0	0	0	0
RPS_02	4.28	5.71	14.36	19.53	1.78	4484.867676	7854.8425	68.466	1.7654	19.1322	0	0.7817	2.8669	5.7307	0	0	0	0.2409	0.3929	0	0	0	0	0.6231	0	0	0	0	0	0	0	0	0	0	0	0	0	0	0	0	0	0	0	0	0	0	0	0	0
RPS_02	4.4	5.49	15.2	15.48	1.56	4476.021484	7854.625	58.9695	2.1506	25.3329	0	0.1948	5.4051	6.4744	0	0	0	0.27	0	0	0	0	0	1.2026	0	0	0	0	0	0	0	0	0	0	0	0	0	0	0	0	0	0	0	0	0	0	0	0	0
RPS_02	2.48	3.31	4.84	8.97	1.77	4640.408691	7960.04	84.6999	0.6926	4.2159	4.8674	0.1609	0	0	0	0.3543	5.0091	0	0	0	0	0	0	0	0	0	0	0	0	0	0	0	0	0	0	0	0	0	0	0	0	0	0	0	0	0	0	0	0
RPS_02	1.53	2.07	1.84	5.06	1.83	4635.333008	7959.9675	88.4812	0.8617	2.9708	3.6092	0	0	0	0	0	4.0771	0	0	0	0	0	0	0	0	0	0	0	0	0	0	0	0	0	0	0	0	0	0	0	0	0	0	0	0	0	0	0	0
RPS_02	3.17	3.57	7.87	9.98	1.27	4721.474609	7957.72	61.7363	1.5083	21.1825	0	0.3641	5.0638	9.2969	0	0	0	0.2349	0	0	0	0	0	0.6132	0	0	0	0	0	0	0	0	0	0	0	0	0	0	0	0	0	0	0	0	0	0	0	0	0
RPS_02	1.57	3.24	1.93	5.93	4.27	4733.946289	7957.14	75.6516	0	9.0116	0.219	0	0.1975	14.9203	0	0	0	0	0	0	0	0	0	0	0	0	0	0	0	0	0	0	0	0	0	0	0	0	0	0	0	0	0	0	0	0	0	0	0
[truncated: 58,930 more rows]
[truncated: 71 more columns]
