# Supplementary material for: Composition and mixing state of atmospheric aerosols determined byelectron microscopy: method development and application to aged Saharandust deposition in the Caribbean boundary layer
Source: Copernicus journal article supplement (doi:10.5194/acp-2018-417), 2018-05-02
Supplement: Supplementary file 1 [file acp-2018-417-supplement.zip › sampling_times.txt]

sample name	sampling begin (UTC)	sampling end (UTC)
RPS_01	2013-06-14 21:19	2013-07-13 15:59
RPS_02	2013-06-15 16:25	2013-07-14 11:06
RPS_03	2013-06-16 13:08	2013-07-15 07:50
RPS_04	2013-06-17 14:39	2013-07-16 09:22
RPS_05	2013-06-18 13:49	2013-07-17 08:33
RPS_06	2013-06-19 13:04	2013-07-18 07:49
RPS_07	2013-06-20 13:27	2013-07-19 08:13
RPS_08	2013-06-21 17:46	2013-07-20 12:33
RPS_09	2013-06-22 19:02	2013-07-21 13:51
RPS_10	2013-06-24 13:10	2013-07-23 08:00
RPS_11	2013-06-25 13:23	2013-07-24 08:14
RPS_13	2013-06-26 12:55	2013-07-25 07:47
RPS_14	2013-06-27 13:16	2013-07-26 08:09
RPS_15	2013-06-28 13:26	2013-07-27 08:20
RPS_16	2013-06-29 13:09	2013-07-28 08:04
RPS_17	2013-06-30 13:26	2013-07-29 08:22
RPS_18	2013-07-01 13:05	2013-07-30 08:02
RPS_19	2013-07-02 12:25	2013-07-31 07:23
RPS_20	2013-07-03 11:53	2013-08-01 06:52
RPS_21	2013-07-04 13:36	2013-08-02 08:36
RPS_22	2013-07-05 12:56	2013-08-03 07:57
RPS_23	2013-07-06 12:18	2013-08-04 07:20
RPS_24	2013-07-07 14:10	2013-08-05 09:13
RPS_25	2013-07-08 14:26	2013-08-06 09:31
RPS_26	2013-07-10 14:06	2013-08-08 09:12
RPS_27	2013-07-11 12:51	2013-08-09 07:58
RPS_28	2013-07-12 11:17	2013-08-10 06:25
RPS_29	2013-07-13 13:13	2013-08-11 08:22
RPS_30	2013-07-14 13:13	2013-08-12 08:23
RPS_31	2016-08-06 20:50	2016-08-07 14:05
RPS_32	2016-08-07 14:10	2016-08-08 16:20
RPS_33	2016-08-08 16:20	2016-08-09 13:52
RPS_34	2016-08-09 13:52	2016-08-10 13:50
RPS_35	2016-08-10 13:50	2016-08-11 15:38
RPS_36	2016-08-11 15:38	2016-08-11 18:21
RPS_37	2016-08-11 18:21	2016-08-12 13:47
RPS_38	2016-08-12 13:47	2016-08-13 13:17
RPS_39	2016-08-13 13:17	2016-08-14 13:11
RPS_40	2016-08-14 13:11	2016-08-15 12:34
RPS_41	2016-08-15 12:34	2016-08-16 13:00
RPS_42	2016-08-16 13:00	2016-08-17 16:35
RPS_43	2016-08-17 16:35	2016-08-18 14:40
RPS_44	2016-08-18 14:40	2016-08-19 11:46
RPS_45	2016-08-19 11:46	2016-08-20 13:54
RPS_46	2016-08-20 13:54	2016-08-21 12:09
RPS_47	2016-08-21 12:09	2016-08-22 12:50
RPS_48	2016-08-22 12:50	2016-08-23 12:37
RPS_49	2016-08-23 12:37	2016-08-24 12:09
RPS_50	2016-08-24 12:09	2016-08-25 12:03
RPS_51	2016-08-25 12:03	2016-08-26 11:40
RPS_52	2016-08-26 11:40	2016-08-27 10:56
